# Supplementary material for: Sec17/Sec18 can support membrane fusion without help from completion of SNARE zippering
Source: eLife journal article supplement (doi:10.7554/elife.67578), 2021-05-04
Supplement: supp [file elife-67578-supp-v1.zip]

Archive with 16 entries (16 files):
- elife_poa_e67578_Transparent_Reporting_File.pdf
- elife_poa_e67578_Figure_1_source_data_1.zip
- elife_poa_e67578_Figure_2_source_data_1.xlsx
- elife_poa_e67578_Figure_3_source_data_1.xlsx
- elife_poa_e67578_Figure_4_source_data_1.xlsx
- elife_poa_e67578_Figure_5_source_data_1.xlsx
- elife_poa_e67578_Figure_6_source_data_1.xlsx
- elife_poa_e67578_Figure_1_figure_supplement_1.tif
- elife_poa_e67578_Figure_2_figure_supplement_1.tif
- elife_poa_e67578_Figure_2_figure_supplement_2.tif
- elife_poa_e67578_Figure_3_figure_supplement_1.tif
- elife_poa_e67578_Figure_4_figure_supplement_1.tif
- elife_poa_e67578_Figure_4_figure_supplement_2.tif
- elife_poa_e67578_Figure_5_figure_supplement_1.tif
- elife_poa_e67578_Figure_5_figure_supplement_2.tif
- elife_poa_e67578_Figure_6_figure_supplement_1.tif
