# Supplementary material for: Sec17/Sec18 can support membrane fusion without help from completion of SNARE zippering
Source: eLife journal article supplement (doi:10.7554/elife.67578), 2021-05-04
Supplement: supp [file elife-67578-supp-v1.zip › elife_poa_e67578_Figure_2_source_data_1.xlsx]

## Sheet: Figure 2B
		Normalized FRET
Time (min)		Trial 1							Trial 2							Trial 3
		U + N	N + N	C + N	U + C	N + C	C + C		U + N	N + N	C + N	U + C	N + C	C + C		U + N	N + N	C + N	U + C	N + C	C + C
0		0.00354	0.00313	0.00168	0.00236	0.00326	0.00126		0.00297	0.00302	0.00143	0.00226	0.00366	0.000789		0.00509	0.00242	-0.000554	0.00262	0.00291	0.000287
0.5		0.00525	0.00547	0.00342	0.00235	0.00325	0.00256		0.00583	0.0052	0.00117	0.00242	0.00451	0.00217		0.00509	0.003	0.000628	0.00269	0.0036	-0.000354
1		0.00762	0.00762	0.00331	0.00342	0.00257	0.00321		0.00898	0.00848	0.00342	0.00302	0.00382	0.00488		0.00767	0.00651	0.00405	0.00314	0.003	0.00192
1.5		0.00897	0.00781	0.00392	0.00456	0.00349	0.00378		0.0102	0.00848	0.00231	0.00391	0.00538	0.00387		0.00965	0.00718	0.0029	0.00295	0.00376	0.00307
2		0.0109	0.00898	0.00477	0.00575	0.00454	0.00526		0.0123	0.00924	0.00539	0.00565	0.00621	0.00663		0.00994	0.00905	0.00229	0.00452	0.00529	0.00325
2.5		0.0125	0.0101	0.0044	0.00569	0.00472	0.00554		0.0135	0.00995	0.00607	0.00567	0.00711	0.00583		0.0109	0.00856	0.00363	0.00501	0.00461	0.00387
3		0.0126	0.0107	0.0065	0.00676	0.00674	0.0053		0.015	0.0108	0.00517	0.00713	0.00645	0.00711		0.0114	0.00949	0.00359	0.00566	0.00567	0.00467
3.5		0.0128	0.0129	0.00451	0.00725	0.00686	0.00656		0.0164	0.0133	0.00671	0.00822	0.00703	0.00722		0.0133	0.0104	0.00403	0.00697	0.00561	0.00563
4		0.0144	0.0121	0.00503	0.00715	0.00735	0.00759		0.0162	0.0141	0.0065	0.0078	0.00708	0.00766		0.0138	0.0111	0.00478	0.00766	0.00612	0.00544
4.5		0.016	0.0149	0.00718	0.00878	0.00623	0.00694		0.0179	0.0145	0.00698	0.00823	0.00778	0.00804		0.015	0.0132	0.00531	0.00772	0.006	0.00732
5		0.0168	0.0144	0.00544	0.00931	0.00768	0.00722		0.0205	0.0156	0.00828	0.0093	0.00839	0.00798		0.0162	0.0132	0.00654	0.00921	0.00653	0.00751
5.5		0.0179	0.015	0.00704	0.00899	0.00763	0.00707		0.0188	0.0147	0.00845	0.009	0.00732	0.00923		0.0169	0.0142	0.00596	0.00876	0.00706	0.0085
6		0.0189	0.0166	0.00757	0.00978	0.00733	0.00795		0.021	0.0167	0.00864	0.00941	0.00827	0.00835		0.0181	0.0147	0.00696	0.00892	0.00755	0.00905
6.5		0.0195	0.0159	0.00716	0.00949	0.00815	0.00849		0.0222	0.0173	0.00789	0.00991	0.00881	0.00992		0.0182	0.0146	0.00807	0.00815	0.00784	0.00845
7		0.0202	0.0166	0.00791	0.00982	0.00826	0.00856		0.0218	0.018	0.00818	0.00949	0.00781	0.0111		0.0205	0.0163	0.00749	0.00938	0.00729	0.00817
7.5		0.0214	0.0179	0.0081	0.00992	0.008	0.00932		0.0244	0.0192	0.0102	0.00994	0.00911	0.011		0.0218	0.0165	0.00824	0.00903	0.00839	0.0101
8		0.0219	0.0176	0.0077	0.00919	0.00839	0.0094		0.0232	0.0189	0.00927	0.0106	0.00958	0.0122		0.0205	0.0179	0.00811	0.0102	0.00776	0.00987
8.5		0.023	0.0194	0.00964	0.00963	0.00888	0.00882		0.0234	0.0193	0.00945	0.0091	0.00887	0.0105		0.0204	0.0178	0.00775	0.00974	0.00887	0.0103
9		0.0228	0.019	0.00692	0.00992	0.0081	0.00976		0.0247	0.02	0.0106	0.00972	0.00952	0.011		0.022	0.0192	0.00861	0.0102	0.00812	0.00841
9.5		0.0241	0.0199	0.0092	0.0101	0.0087	0.00948		0.0261	0.0199	0.00886	0.0104	0.00934	0.013		0.0239	0.0197	0.00985	0.0113	0.00867	0.01
10		0.0238	0.0189	0.00822	0.0106	0.00926	0.00937		0.0274	0.0206	0.00923	0.0114	0.0101	0.0127		0.0234	0.0199	0.00872	0.0107	0.00806	0.0111
10.5		0.0245	0.0197	0.00989	0.0104	0.00909	0.00944		0.0262	0.02	0.0104	0.0106	0.00865	0.0119		0.0243	0.0209	0.00946	0.0107	0.009	0.011
11		0.0258	0.0199	0.00996	0.0106	0.00885	0.0105		0.0267	0.0204	0.0101	0.011	0.00967	0.0126		0.0244	0.0219	0.0101	0.00963	0.00841	0.0112
11.5		0.0257	0.0201	0.01	0.0109	0.00956	0.0104		0.0259	0.0193	0.0106	0.0107	0.0103	0.0119		0.0244	0.0211	0.00819	0.00976	0.00877	0.0105
12		0.0267	0.0223	0.0085	0.0115	0.00857	0.0101		0.0282	0.0215	0.0101	0.0114	0.00987	0.0111		0.0268	0.0212	0.0106	0.0104	0.00888	0.0118
12.5		0.0277	0.0219	0.0112	0.0106	0.0093	0.0101		0.0274	0.0206	0.0113	0.0115	0.00993	0.0124		0.0271	0.0223	0.00905	0.0104	0.00854	0.0109
13		0.0277	0.0207	0.0105	0.0108	0.00892	0.0106		0.0299	0.022	0.0107	0.0107	0.0104	0.0132		0.0268	0.0225	0.0105	0.0108	0.00834	0.0118
13.5		0.0279	0.0229	0.0105	0.0117	0.00908	0.01		0.0283	0.0222	0.012	0.0105	0.0103	0.013		0.0275	0.0225	0.0108	0.0105	0.00907	0.0119
14		0.028	0.0232	0.0103	0.0109	0.00936	0.00996		0.0289	0.0224	0.0111	0.0111	0.0102	0.013		0.0278	0.0222	0.00841	0.0101	0.00927	0.0116
14.5		0.0292	0.0225	0.0117	0.0116	0.00924	0.0102		0.0309	0.0225	0.0112	0.0108	0.0113	0.0141		0.0294	0.024	0.0109	0.0112	0.00942	0.0124
15		0.0281	0.0225	0.0112	0.0111	0.00928	0.0109		0.0294	0.0225	0.0112	0.0108	0.0102	0.0133		0.0289	0.0246	0.00997	0.0109	0.00893	0.0124
15.5		0.0289	0.0225	0.0112	0.0116	0.00906	0.0117		0.031	0.0223	0.0119	0.0127	0.0104	0.0142		0.0294	0.0244	0.00991	0.011	0.00877	0.011
16		0.0309	0.0219	0.0119	0.0125	0.00911	0.0104		0.0306	0.0232	0.00994	0.0107	0.011	0.0142		0.0297	0.0244	0.011	0.01	0.00862	0.0114
16.5		0.03	0.0227	0.0106	0.012	0.00931	0.0105		0.03	0.0221	0.0129	0.0119	0.00984	0.0145		0.0295	0.0251	0.0107	0.0113	0.00953	0.0113
17		0.029	0.0243	0.0123	0.0122	0.0101	0.0116		0.0308	0.0233	0.0114	0.0112	0.0105	0.0145		0.0306	0.0252	0.0112	0.0115	0.00936	0.0132
17.5		0.0296	0.0241	0.0106	0.0124	0.0103	0.0123		0.0301	0.0234	0.0113	0.0117	0.0108	0.0134		0.0304	0.0253	0.0112	0.0112	0.0102	0.0128
18		0.0304	0.0246	0.0117	0.0121	0.0105	0.0113		0.0311	0.0234	0.0111	0.0124	0.0112	0.0149		0.0302	0.0259	0.011	0.0105	0.0104	0.0123
18.5		0.0309	0.0244	0.0119	0.0114	0.0105	0.0119		0.0299	0.0238	0.0126	0.0124	0.0104	0.0151		0.0301	0.0256	0.00917	0.0103	0.0101	0.0117
19		0.0312	0.0249	0.0115	0.0123	0.0101	0.0119		0.0308	0.0241	0.0126	0.0116	0.0112	0.0144		0.0309	0.0247	0.0116	0.0109	0.00995	0.0134
19.5		0.0309	0.0249	0.012	0.0118	0.00928	0.0112		0.0314	0.0229	0.0122	0.0111	0.0127	0.0146		0.0305	0.0264	0.0108	0.0105	0.00866	0.013
20		0.0319	0.0246	0.0108	0.0116	0.0101	0.0126		0.0328	0.0256	0.0126	0.0121	0.0113	0.0144		0.0297	0.0259	0.0111	0.0107	0.00914	0.0135
20.5		0.0325	0.0246	0.014	0.0131	0.00943	0.0116		0.032	0.0248	0.0125	0.0114	0.0113	0.0139		0.0307	0.0254	0.0111	0.0119	0.00987	0.0127
21		0.0315	0.0245	0.0123	0.0114	0.0091	0.0126		0.033	0.025	0.012	0.0121	0.0108	0.0149		0.0319	0.0281	0.0101	0.0108	0.00933	0.0129
21.5		0.0302	0.0241	0.0126	0.0124	0.0105	0.0118		0.032	0.0251	0.011	0.0117	0.0113	0.0154		0.032	0.0272	0.0107	0.0115	0.00921	0.0132
22		0.0315	0.0269	0.0116	0.0129	0.0101	0.012		0.0324	0.0247	0.0131	0.0125	0.0113	0.0154		0.0318	0.0267	0.0106	0.0123	0.00878	0.0136
22.5		0.0321	0.0258	0.0109	0.0119	0.0104	0.0124		0.0333	0.0252	0.0122	0.0131	0.0111	0.0144		0.032	0.0268	0.0106	0.0122	0.00936	0.0134
23		0.0313	0.0245	0.0117	0.0122	0.0099	0.012		0.0346	0.0263	0.0119	0.0123	0.0112	0.0149		0.0314	0.0274	0.0116	0.0115	0.0102	0.0135
23.5		0.0317	0.026	0.0114	0.0121	0.0105	0.0122		0.0328	0.0237	0.0111	0.0116	0.0111	0.0138		0.0321	0.0267	0.0112	0.0129	0.00957	0.0144
24		0.0315	0.0251	0.0123	0.013	0.00988	0.0128		0.0332	0.0257	0.0136	0.0111	0.0117	0.0152		0.0331	0.0277	0.0122	0.0131	0.00999	0.0144
24.5		0.0313	0.0252	0.0122	0.0123	0.00939	0.0124		0.0342	0.026	0.0124	0.0127	0.0119	0.0146		0.0326	0.0267	0.0125	0.0116	0.0104	0.0133
25		0.0317	0.0264	0.0126	0.0126	0.0107	0.0119		0.0329	0.0263	0.0116	0.012	0.0114	0.0168		0.0323	0.0268	0.0123	0.0117	0.00965	0.0133
25.5		0.0316	0.0256	0.0115	0.0127	0.00962	0.0121		0.0333	0.0269	0.0133	0.0124	0.011	0.0163		0.0337	0.0269	0.0118	0.0108	0.00985	0.0132
26		0.0322	0.0259	0.0117	0.0122	0.0105	0.0117		0.0344	0.0255	0.0119	0.0123	0.0108	0.0145		0.0329	0.0273	0.0126	0.0118	0.00929	0.0136
26.5		0.0334	0.0266	0.0125	0.0116	0.0107	0.0132		0.0346	0.0266	0.0131	0.0122	0.0114	0.0158		0.0342	0.0276	0.0119	0.0117	0.00998	0.0136
27		0.0325	0.0244	0.0114	0.0121	0.0106	0.0126		0.0353	0.0272	0.0131	0.0132	0.011	0.0158		0.033	0.0286	0.0114	0.0117	0.0105	0.0134
27.5		0.0325	0.0265	0.013	0.0119	0.0106	0.0113		0.0339	0.0268	0.0127	0.0119	0.0108	0.0156		0.0332	0.0281	0.0118	0.012	0.0109	0.0141
28		0.0326	0.027	0.0128	0.0125	0.0103	0.012		0.0346	0.0263	0.0125	0.0121	0.0118	0.0156		0.0343	0.0286	0.0115	0.0114	0.0101	0.0149
28.5		0.0328	0.0259	0.0116	0.0122	0.0105	0.012		0.0351	0.0263	0.0127	0.0126	0.0106	0.017		0.0328	0.0288	0.0128	0.0121	0.0108	0.0149
29		0.0332	0.0261	0.0111	0.0123	0.0111	0.0119		0.0357	0.0258	0.0125	0.0126	0.012	0.0151		0.0327	0.028	0.0114	0.0123	0.0103	0.0138
29.5		0.0332	0.0257	0.0123	0.0123	0.0117	0.0128		0.0339	0.0264	0.0137	0.0122	0.0115	0.0155		0.0328	0.0288	0.0118	0.0114	0.01	0.0149
30		0.0331	0.0272	0.013	0.012	0.0105	0.0123		0.0348	0.0278	0.0129	0.0113	0.0116	0.0153		0.0342	0.0281	0.012	0.0114	0.0102	0.0146
30.5		0.0324	0.0261	0.0122	0.0131	0.0106	0.0121		0.0353	0.0274	0.0122	0.0129	0.0117	0.0161		0.0341	0.0292	0.0119	0.0126	0.0109	0.0149
31		0.033	0.0265	0.013	0.0122	0.0106	0.0122		0.0357	0.0265	0.0122	0.0116	0.0105	0.0158		0.0335	0.0293	0.0128	0.0128	0.00986	0.0148
31.5		0.0334	0.0268	0.0131	0.0125	0.0119	0.0137		0.035	0.028	0.0124	0.0115	0.0121	0.0165		0.0335	0.0289	0.0137	0.011	0.0113	0.0147
32		0.0329	0.0265	0.0128	0.0126	0.0105	0.0126		0.0348	0.0283	0.0137	0.0128	0.0117	0.0155		0.0339	0.0285	0.0127	0.0123	0.0107	0.0147
32.5		0.0333	0.0266	0.0123	0.0119	0.0105	0.0134		0.0346	0.0275	0.0121	0.0125	0.0126	0.016		0.0328	0.0291	0.0128	0.0109	0.00953	0.015
33		0.033	0.0265	0.0135	0.0126	0.0111	0.0129		0.0351	0.0277	0.013	0.0128	0.0114	0.0153		0.0327	0.0295	0.0114	0.0117	0.0108	0.0148
33.5		0.0334	0.0269	0.012	0.0125	0.0107	0.0123		0.0354	0.0273	0.0138	0.0132	0.0116	0.0169		0.0347	0.0297	0.0111	0.0117	0.0102	0.0149
34		0.0348	0.0266	0.0127	0.0126	0.011	0.0125		0.0357	0.0278	0.0144	0.012	0.0123	0.0167		0.0329	0.0301	0.0119	0.0123	0.00993	0.0146
34.5		0.0333	0.0269	0.0129	0.013	0.0108	0.0124		0.0342	0.0283	0.014	0.0142	0.0117	0.0169		0.034	0.0285	0.0129	0.0126	0.0115	0.0151
35		0.033	0.027	0.0122	0.0128	0.00999	0.013		0.0354	0.0267	0.0138	0.0114	0.0127	0.0151		0.0321	0.0281	0.0115	0.0126	0.011	0.0159
35.5		0.0332	0.0266	0.0122	0.0139	0.00999	0.0137		0.0349	0.0274	0.0136	0.0122	0.011	0.0155		0.034	0.0289	0.0134	0.0129	0.0113	0.0155
36		0.0337	0.0256	0.0125	0.0128	0.0111	0.0137		0.0354	0.0271	0.0137	0.0133	0.0122	0.0173		0.0335	0.0287	0.0131	0.0119	0.0109	0.0152
36.5		0.0332	0.0273	0.0126	0.0124	0.0107	0.0125		0.0347	0.0276	0.0127	0.0125	0.0119	0.015		0.0341	0.0285	0.0117	0.0129	0.0105	0.0148
37		0.0339	0.0266	0.0126	0.0122	0.011	0.0133		0.0347	0.028	0.014	0.0128	0.0122	0.0167		0.0341	0.03	0.0126	0.0124	0.01	0.0147
37.5		0.0336	0.0275	0.0129	0.0124	0.00997	0.0133		0.0352	0.028	0.0138	0.0135	0.0114	0.0163		0.0348	0.0298	0.0132	0.0117	0.00973	0.0149
38		0.0331	0.0273	0.0133	0.0134	0.0112	0.0128		0.0358	0.0276	0.0133	0.0126	0.0115	0.0164		0.0343	0.0298	0.0124	0.0124	0.0106	0.0146
38.5		0.034	0.0275	0.013	0.0138	0.011	0.0135		0.0355	0.0279	0.0138	0.0116	0.0128	0.0162		0.0338	0.0304	0.012	0.0124	0.0109	0.0151
39		0.0338	0.0264	0.0128	0.0127	0.0109	0.0132		0.0358	0.0276	0.0131	0.0128	0.0123	0.0163		0.0355	0.0293	0.0128	0.0124	0.0103	0.0139
39.5		0.0343	0.0266	0.0127	0.0116	0.0113	0.0123		0.0355	0.0269	0.0137	0.0121	0.0119	0.0154		0.034	0.0304	0.0135	0.0125	0.0101	0.0169
40		0.034	0.0276	0.0122	0.013	0.011	0.0138		0.0355	0.0276	0.0119	0.0138	0.0118	0.0177		0.0339	0.0308	0.0132	0.0131	0.00979	0.0148
40.5		0.0335	0.0265	0.0129	0.0131	0.0109	0.0134		0.0363	0.0275	0.0136	0.0125	0.0121	0.0176		0.036	0.0309	0.0116	0.0131	0.0114	0.0154
41		0.035	0.0276	0.0142	0.0123	0.0109	0.0134		0.0352	0.0281	0.0121	0.0125	0.0132	0.0169		0.0358	0.0313	0.0138	0.0122	0.0111	0.015
41.5		0.0342	0.0256	0.0127	0.0133	0.0112	0.0122		0.035	0.0278	0.0132	0.0127	0.0121	0.0174		0.0335	0.0291	0.0129	0.0129	0.0112	0.0161
42		0.034	0.0278	0.0122	0.0121	0.0108	0.0126		0.0364	0.0285	0.0136	0.0123	0.0113	0.0177		0.035	0.0297	0.013	0.0127	0.0108	0.0149
42.5		0.0343	0.0268	0.0128	0.0127	0.0112	0.0129		0.0357	0.028	0.0121	0.0128	0.0118	0.0165		0.0354	0.0296	0.0137	0.0118	0.0105	0.0153
43		0.0338	0.0278	0.0126	0.0123	0.0104	0.0125		0.0359	0.028	0.0122	0.0134	0.0115	0.0162		0.0351	0.0307	0.0131	0.013	0.0107	0.015
43.5		0.0346	0.0285	0.0129	0.0124	0.012	0.0137		0.0352	0.0283	0.0123	0.0128	0.0115	0.0164		0.0341	0.0311	0.0125	0.0134	0.0111	0.0157
44		0.0345	0.0278	0.0124	0.0128	0.0117	0.0137		0.0363	0.0285	0.0132	0.0129	0.0119	0.018		0.035	0.0305	0.0121	0.0124	0.0105	0.0153
44.5		0.0337	0.0274	0.013	0.0124	0.0112	0.0133		0.0362	0.0273	0.0125	0.0128	0.0113	0.0168		0.0356	0.0311	0.0136	0.0129	0.0112	0.0151
45		0.0343	0.0278	0.0136	0.0126	0.0109	0.0135		0.0358	0.0277	0.0116	0.0126	0.0126	0.016		0.0353	0.0303	0.0133	0.0131	0.0109	0.0153
45.5		0.0337	0.029	0.0131	0.0136	0.0107	0.0128		0.0359	0.0279	0.014	0.0135	0.0123	0.0158		0.0344	0.0304	0.0119	0.0123	0.0105	0.0152
46		0.0361	0.0271	0.0138	0.0124	0.0104	0.014		0.0356	0.0284	0.0128	0.013	0.0118	0.0164		0.0333	0.0312	0.0126	0.0124	0.0114	0.0141
46.5		0.0341	0.0276	0.0133	0.0126	0.0106	0.0136		0.0353	0.0284	0.0137	0.0124	0.0122	0.0154		0.0358	0.0305	0.0126	0.0131	0.0111	0.0156
47		0.0343	0.0288	0.0133	0.013	0.0109	0.0131		0.0352	0.0288	0.0136	0.0117	0.0125	0.016		0.0356	0.0308	0.0124	0.0119	0.0114	0.0159
47.5		0.0335	0.0287	0.0135	0.0133	0.0116	0.0136		0.0353	0.0288	0.013	0.0144	0.0114	0.0179		0.0349	0.0297	0.0132	0.0125	0.0104	0.0156
48		0.0334	0.0286	0.0143	0.0125	0.0115	0.0149		0.037	0.0298	0.0141	0.0133	0.0119	0.0175		0.0341	0.0307	0.0134	0.0129	0.0106	0.0162
48.5		0.0347	0.0282	0.0141	0.0133	0.0103	0.0135		0.0345	0.0272	0.0143	0.0121	0.0115	0.0164		0.035	0.0309	0.0136	0.013	0.0103	0.0159
49		0.0347	0.0281	0.0141	0.0128	0.0115	0.0144		0.0359	0.0284	0.0137	0.0133	0.0117	0.0171		0.0346	0.0307	0.0132	0.0129	0.0105	0.0157
49.5		0.0342	0.0283	0.0136	0.0137	0.0112	0.014		0.0351	0.0287	0.0134	0.0132	0.0123	0.0163		0.0361	0.0313	0.0147	0.013	0.0114	0.0146
50		0.0346	0.0289	0.0133	0.013	0.0123	0.0141		0.0361	0.0295	0.0148	0.0121	0.0125	0.0172		0.0349	0.0298	0.0152	0.013	0.0114	0.0157
50.5		0.0339	0.0292	0.0135	0.0135	0.0111	0.0132		0.0355	0.0293	0.0136	0.0126	0.0127	0.0174		0.0354	0.0324	0.0139	0.0128	0.0104	0.0163
51		0.0333	0.0283	0.0135	0.0128	0.0116	0.014		0.0356	0.0283	0.0143	0.014	0.0122	0.0169		0.0361	0.0312	0.0146	0.0133	0.0117	0.016
51.5		0.0342	0.0288	0.0134	0.013	0.0111	0.0138		0.0358	0.0296	0.0151	0.0144	0.0121	0.0178		0.0336	0.0306	0.0133	0.0125	0.0101	0.015
52		0.0341	0.0282	0.0137	0.0129	0.011	0.0132		0.0353	0.0306	0.0133	0.0126	0.0122	0.0179		0.0344	0.0302	0.0121	0.012	0.0107	0.0153
52.5		0.0335	0.028	0.0139	0.0129	0.011	0.0141		0.0365	0.0286	0.0138	0.0128	0.0123	0.0163		0.0337	0.03	0.0139	0.0132	0.0115	0.0156
53		0.0344	0.0285	0.0142	0.0134	0.0109	0.0129		0.036	0.0282	0.0126	0.0117	0.0126	0.0163		0.0349	0.031	0.0137	0.0129	0.0104	0.016
53.5		0.0348	0.0286	0.0133	0.0133	0.0109	0.0134		0.0361	0.0289	0.0148	0.0142	0.0122	0.0182		0.0347	0.0307	0.0127	0.0138	0.0109	0.0154
54		0.0354	0.0283	0.0136	0.0134	0.0107	0.0138		0.036	0.029	0.0126	0.0139	0.013	0.0173		0.0352	0.0314	0.0135	0.0132	0.0108	0.0153
54.5		0.0355	0.028	0.0137	0.0133	0.0118	0.0132		0.0359	0.0297	0.0151	0.0131	0.0127	0.0163		0.0359	0.0313	0.0122	0.013	0.0109	0.0155
55		0.035	0.0281	0.0126	0.0131	0.0112	0.0139		0.0371	0.029	0.0144	0.0138	0.0126	0.0172		0.0346	0.03	0.0127	0.0134	0.011	0.0158
55.5		0.0339	0.0285	0.0135	0.0126	0.0115	0.0144		0.036	0.0292	0.0144	0.0138	0.012	0.0181		0.035	0.0312	0.0137	0.0123	0.0113	0.0149
56		0.034	0.0288	0.0139	0.0128	0.0124	0.0143		0.0356	0.0286	0.0142	0.0135	0.0132	0.0163		0.0355	0.0301	0.0138	0.0123	0.0109	0.0174
56.5		0.0337	0.0287	0.0132	0.0134	0.0112	0.0144		0.036	0.0291	0.0145	0.0137	0.0122	0.0172		0.0348	0.0301	0.0133	0.0122	0.0109	0.0174
57		0.0338	0.0282	0.0137	0.0127	0.012	0.0144		0.0363	0.0301	0.0138	0.0136	0.0128	0.0167		0.0345	0.0309	0.0141	0.0134	0.0102	0.0163
57.5		0.0353	0.0286	0.0141	0.0127	0.0113	0.0141		0.0364	0.0287	0.0131	0.0145	0.0129	0.0173		0.0352	0.0306	0.0129	0.0132	0.0108	0.018
58		0.0343	0.0282	0.0129	0.0134	0.0106	0.0149		0.0356	0.0291	0.0151	0.0134	0.0122	0.0184		0.0349	0.0306	0.0139	0.0138	0.0103	0.0157
58.5		0.0336	0.0294	0.0143	0.0132	0.0108	0.0142		0.0358	0.0292	0.0137	0.0138	0.0125	0.0186		0.0353	0.0317	0.0145	0.0114	0.0113	0.0152
59		0.0351	0.029	0.0138	0.0127	0.0112	0.0145		0.0353	0.0282	0.0135	0.015	0.0126	0.0171		0.0354	0.0303	0.0137	0.0135	0.0106	0.0152
59.5		0.0348	0.028	0.0139	0.014	0.011	0.0136		0.0363	0.0288	0.0149	0.0131	0.0123	0.0168		0.0348	0.0307	0.0136	0.0119	0.0111	0.0158
60		0.0347	0.0288	0.0138	0.014	0.0116	0.014		0.0364	0.0303	0.0141	0.0129	0.0126	0.0181		0.0347	0.0315	0.0136	0.0137	0.0103	0.0152
60.5		NA	NA	NA	NA	NA	NA		NA	NA	NA	NA	NA	NA		NA	NA	NA	NA	NA	NA
61		0.0308	0.0268	0.0113	0.0131	0.00933	0.0159		0.0324	0.0277	0.0106	0.0132	0.0107	0.0195		0.0314	0.0293	0.0108	0.0126	0.0097	0.018
61.5		0.0291	0.0268	0.0108	0.0133	0.00963	0.0184		0.0307	0.0271	0.011	0.0135	0.0113	0.0211		0.0298	0.03	0.0108	0.0138	0.00976	0.0213
62		0.0298	0.027	0.0111	0.0134	0.01	0.019		0.0317	0.0269	0.0103	0.0134	0.0106	0.0232		0.0301	0.028	0.0111	0.0137	0.00934	0.0245
62.5		0.0303	0.0264	0.0107	0.014	0.00874	0.0188		0.0305	0.0271	0.0113	0.0131	0.0104	0.0239		0.0301	0.0277	0.00949	0.0135	0.00875	0.0217
63		0.0287	0.0257	0.0122	0.0142	0.00995	0.0201		0.0293	0.0274	0.0103	0.0127	0.0112	0.0249		0.0291	0.0267	0.00994	0.0135	0.00941	0.025
63.5		0.029	0.0261	0.0111	0.0134	0.00939	0.0206		0.0288	0.0271	0.0108	0.0154	0.0117	0.0244		0.0298	0.0283	0.0107	0.0138	0.00894	0.0242
64		0.0272	0.0256	0.0111	0.0131	0.00907	0.0193		0.0289	0.0262	0.0116	0.0132	0.00989	0.0254		0.0296	0.0285	0.0103	0.0138	0.00883	0.0253
64.5		0.0285	0.0255	0.0104	0.0137	0.00945	0.0196		0.0299	0.0265	0.0116	0.0138	0.0106	0.0256		0.0302	0.0281	0.011	0.015	0.00895	0.0244
65		0.0287	0.0254	0.0101	0.0135	0.0093	0.0198		0.0306	0.0261	0.0108	0.0138	0.00966	0.0249		0.0298	0.0281	0.00952	0.0142	0.00882	0.0245
65.5		0.0295	0.0256	0.0102	0.0144	0.00949	0.0207		0.03	0.0255	0.0118	0.0139	0.00974	0.0254		0.03	0.0269	0.00972	0.0132	0.0084	0.0254
66		0.0282	0.0264	0.0106	0.0133	0.01	0.0212		0.0302	0.0264	0.0104	0.0137	0.0101	0.025		0.0279	0.0281	0.0106	0.0149	0.00888	0.0247
66.5		0.0286	0.0268	0.0116	0.0139	0.0103	0.0203		0.0283	0.0276	0.012	0.0139	0.0103	0.0255		0.0284	0.0277	0.00974	0.0132	0.00892	0.0246
67		0.0292	0.0257	0.0104	0.0139	0.00891	0.02		0.0283	0.0255	0.0119	0.0142	0.0103	0.0256		0.0293	0.0271	0.0107	0.0134	0.00882	0.026
67.5		0.0275	0.0257	0.0115	0.0134	0.0091	0.0209		0.0307	0.0268	0.011	0.0137	0.0103	0.0265		0.0277	0.029	0.00979	0.0138	0.0081	0.026
68		0.0286	0.0255	0.0115	0.014	0.00953	0.021		0.0306	0.0265	0.011	0.0146	0.0101	0.0265		0.0281	0.0278	0.00905	0.0138	0.0094	0.0266
68.5		0.0271	0.0257	0.0101	0.0133	0.00973	0.0208		0.0291	0.0247	0.0107	0.0134	0.0104	0.0275		0.0283	0.0287	0.00991	0.014	0.00947	0.0255
69		0.0287	0.0255	0.0116	0.0139	0.00953	0.0215		0.0294	0.0263	0.0104	0.0143	0.0106	0.0261		0.0289	0.0274	0.0103	0.0138	0.00927	0.0264
69.5		0.0281	0.0258	0.0103	0.0129	0.0101	0.0212		0.0283	0.0257	0.011	0.0139	0.0116	0.0273		0.0278	0.0278	0.0102	0.0143	0.00918	0.025
70		0.0283	0.0251	0.0115	0.0136	0.00903	0.0218		0.029	0.0258	0.0111	0.0134	0.0107	0.027		0.0283	0.0284	0.011	0.0142	0.00824	0.0276
70.5		0.0275	0.0261	0.012	0.0138	0.00913	0.0216		0.0288	0.0265	0.0111	0.0144	0.0111	0.0263		0.0277	0.0283	0.0102	0.0147	0.00856	0.0259
71		0.0282	0.0262	0.0112	0.0137	0.00959	0.0207		0.0294	0.0264	0.0112	0.0141	0.00949	0.0271		0.0286	0.0278	0.00973	0.0141	0.00846	0.0267
71.5		0.0284	0.0252	0.0102	0.014	0.00905	0.021		0.0289	0.0254	0.0111	0.0153	0.01	0.0271		0.0289	0.0273	0.00977	0.0131	0.00995	0.0259
72		0.029	0.0257	0.0104	0.0137	0.00762	0.0209		0.0284	0.0262	0.0102	0.0148	0.0101	0.0279		0.0283	0.0281	0.0115	0.0137	0.00916	0.027
72.5		0.0283	0.0258	0.011	0.0137	0.00942	0.0224		0.0287	0.0258	0.0106	0.0142	0.0103	0.0262		0.0289	0.028	0.0108	0.0143	0.00944	0.0269
73		0.0282	0.0264	0.0111	0.0141	0.00885	0.0214		0.0285	0.0268	0.0115	0.0151	0.0099	0.0282		0.0288	0.0276	0.0104	0.0143	0.00929	0.0273
73.5		0.0272	0.027	0.0104	0.0129	0.00869	0.0207		0.0292	0.0265	0.0107	0.0146	0.0103	0.0278		0.0283	0.0281	0.0104	0.0137	0.00947	0.0269
74		0.028	0.0269	0.0105	0.0132	0.00969	0.0212		0.029	0.0276	0.011	0.0143	0.0109	0.0268		0.0298	0.028	0.0102	0.0135	0.00888	0.0268
74.5		0.0293	0.0267	0.0121	0.0145	0.00824	0.0222		0.0282	0.026	0.0106	0.0151	0.0109	0.0272		0.0298	0.0276	0.0113	0.0134	0.00856	0.0262
75		0.0278	0.0258	0.0105	0.0135	0.00922	0.0211		0.0281	0.0263	0.0111	0.0142	0.0111	0.0269		0.0295	0.0278	0.0115	0.0142	0.0091	0.0272
75.5		0.0275	0.0256	0.011	0.0138	0.00895	0.0214		0.0292	0.026	0.011	0.0152	0.0101	0.0267		0.0303	0.0281	0.0116	0.0155	0.00983	0.0264
76		0.0273	0.0268	0.0103	0.0149	0.00873	0.0205		0.0295	0.0271	0.0104	0.014	0.0103	0.028		0.0289	0.0278	0.00979	0.0144	0.00847	0.0267
76.5		0.028	0.0255	0.0114	0.0139	0.00883	0.0207		0.0286	0.0265	0.0106	0.0137	0.00994	0.0274		0.0283	0.0289	0.0112	0.0144	0.00881	0.028
77		0.0263	0.0253	0.0116	0.0143	0.00913	0.0214		0.0276	0.0264	0.0102	0.0145	0.0111	0.0286		0.0287	0.0279	0.00961	0.0134	0.00887	0.0265
77.5		0.0281	0.0259	0.0106	0.0145	0.00934	0.0229		0.028	0.0254	0.0109	0.014	0.0108	0.0274		0.0281	0.0269	0.0105	0.0146	0.0093	0.0271
78		0.0287	0.0258	0.0101	0.0138	0.0092	0.0232		0.0282	0.0259	0.0113	0.0134	0.0116	0.029		0.0291	0.0288	0.01	0.0144	0.00954	0.0269
78.5		0.028	0.0262	0.0117	0.0139	0.00937	0.0211		0.0279	0.0263	0.0107	0.0145	0.0108	0.0277		0.0289	0.0271	0.0104	0.014	0.0096	0.028
79		0.0273	0.0259	0.012	0.0141	0.00913	0.0213		0.0293	0.0252	0.0113	0.0143	0.01	0.0273		0.0279	0.0276	0.0103	0.0137	0.00823	0.0266
79.5		0.0272	0.0259	0.0106	0.0141	0.00933	0.0213		0.0286	0.0263	0.0115	0.0144	0.0104	0.0284		0.0297	0.0268	0.0112	0.0147	0.00897	0.0278
80		0.0288	0.0262	0.0114	0.0143	0.00841	0.0218		0.0285	0.0266	0.0105	0.014	0.0109	0.0282		0.0276	0.0285	0.0103	0.0146	0.00878	0.0267
80.5		0.0271	0.0255	0.011	0.014	0.00974	0.0209		0.0288	0.0265	0.00979	0.0143	0.0106	0.0285		0.0286	0.0269	0.0108	0.0138	0.00907	0.0271
81		0.0277	0.0259	0.0111	0.0138	0.00888	0.0223		0.0284	0.0262	0.0104	0.015	0.00948	0.0276		0.0285	0.028	0.0102	0.0148	0.00901	0.027
