# Supplementary material for: Sec17/Sec18 can support membrane fusion without help from completion of SNARE zippering
Source: eLife journal article supplement (doi:10.7554/elife.67578), 2021-05-04
Supplement: supp [file elife-67578-supp-v1.zip › elife_poa_e67578_Figure_3_source_data_1.xlsx]

## Sheet: Figure 3A. R&QaQb
	Replicate 1				Replicate 2				Replicate 3				Average				Standard Deviation
Time (min)	Buffer	Sec17/Sec18/ATP	Sec17/Sec18/ATP𝛾S	Time (min)	Buffer	Sec17/Sec18/ATP	Sec17/Sec18/ATP𝛾S	Time (min)	Buffer	Sec17/Sec18/ATP	Sec17/Sec18/ATP𝛾S	Time (min)	Buffer	Sec17/Sec18/ATP	Sec17/Sec18/ATP𝛾S	Time (min)	Buffer	Sec17/Sec18/ATP	Sec17/Sec18/ATP𝛾S
0	0.01743	0.0405743	0.108294	0	0	0.0167394	0.0210645	0	0.0138486	0.0208682	0.0281907	0	0.0104262	0.0260606	0.0525165	0	0.00920521	0.0127376	0.0484362
1	0.0139064	0.0749507	0.16921	1	-0.00403971	0.0440833	0.0740994	1	0.00375901	0.0443837	0.0717547	1	0.00454192	0.0544726	0.105021	1	0.00899866	0.0177352	0.0556011
2	0.0138125	0.102185	0.217366	2	-0.00287614	0.0702916	0.116377	2	-0.00784297	0.0606242	0.110855	2	0.00103114	0.0777002	0.148199	2	0.0113442	0.0217482	0.0599641
3	0.0130907	0.12602	0.25426	3	-0.00288585	0.0904404	0.152079	3	-0.00520666	0.0816244	0.128902	3	0.00166607	0.0993616	0.178414	3	0.00996186	0.0235039	0.0666992
4	0.0148833	0.141908	0.279915	4	0.00206844	0.11379	0.183202	4	-0.0050564	0.0987213	0.157028	4	0.00396513	0.11814	0.206715	4	0.0101043	0.0219197	0.0647296
5	0.0109015	0.164591	0.306739	5	-0.00331096	0.133621	0.211281	5	-0.00474854	0.107048	0.185374	5	0.000947322	0.135087	0.234465	5	0.00865046	0.0287997	0.063918
6	0.0100381	0.177314	0.329236	6	-0.00364011	0.151779	0.237078	6	-0.00385918	0.123146	0.206449	6	0.000846268	0.150746	0.257588	6	0.00796111	0.0270987	0.0639114
7	0.0116233	0.192815	0.346631	7	-0.00183645	0.172045	0.254616	7	-0.00667508	0.140833	0.233328	7	0.00103725	0.168564	0.278192	7	0.00948162	0.0261653	0.0602183
8	0.00606462	0.204208	0.36102	8	-0.000759115	0.189212	0.272174	8	-0.00705746	0.149222	0.250318	8	-0.000583982	0.180881	0.294504	8	0.00656279	0.0284242	0.0586318
9	0.00725036	0.21297	0.373795	9	0.00140163	0.20105	0.290485	9	-0.0041707	0.161739	0.267797	9	0.00149376	0.19192	0.310692	9	0.00571109	0.0268082	0.0558134
10	0.00386555	0.221749	0.379808	10	-0.0018486	0.2191	0.303623	10	-0.00634524	0.177245	0.280942	10	-0.00144276	0.206031	0.321458	10	0.00511748	0.0249648	0.0517895
11	0.00568059	0.231975	0.390437	11	-0.00207087	0.233195	0.317221	11	-0.0077428	0.188969	0.294827	11	-0.00137769	0.218047	0.334162	11	0.00673849	0.025189	0.0500055
12	0.00607023	0.237052	0.40189	12	-0.000572069	0.245884	0.329039	12	-0.0053105	0.202523	0.309859	12	6.25537e-05	0.228486	0.346929	12	0.00571684	0.0229141	0.0485537
13	0.00393703	0.240149	0.409154	13	-0.00197734	0.256122	0.338525	13	-0.00509549	0.214718	0.316905	13	-0.00104527	0.236996	0.354861	13	0.00458783	0.0208812	0.0482454
14	0.00602118	0.248701	0.419091	14	-0.000552636	0.267651	0.34553	14	-0.00515169	0.227757	0.329417	14	0.000105618	0.248036	0.364679	14	0.00561544	0.0199554	0.0478057
15	0.00298956	0.254163	0.423121	15	0.00111377	0.275813	0.356903	15	-0.0011459	0.23923	0.337068	15	0.000985811	0.256402	0.372364	15	0.0020707	0.0183937	0.0450614
16	0.0016861	0.26219	0.426049	16	0.000195548	0.284304	0.355061	16	-0.00327401	0.248468	0.341706	16	-0.000464123	0.264987	0.374272	16	0.00254501	0.0180807	0.0453346
17	0.00608565	0.266873	0.43487	17	-0.00105304	0.292754	0.36301	17	-0.00385307	0.257495	0.351927	17	0.000393176	0.272374	0.383269	17	0.00512477	0.0182616	0.04503
18	0.00553623	0.26979	0.441487	18	-0.00143564	0.298372	0.366685	18	-0.00418903	0.262966	0.357436	18	-2.9479e-05	0.277043	0.388536	18	0.0050128	0.0187846	0.0460895
19	0.000365812	0.277359	0.442352	19	-0.00218018	0.301257	0.369017	19	-0.0033693	0.266292	0.355751	19	-0.00172789	0.281636	0.38904	19	0.00190819	0.0178704	0.0466434
20	0.00270785	0.273766	0.447699	20	-0.00128503	0.30605	0.370277	20	-0.00294539	0.277198	0.358331	20	-0.000507525	0.285671	0.392102	20	0.00290571	0.0177316	0.048517
21	0.000744237	0.28148	0.450372	21	-0.0021073	0.307693	0.377098	21	-0.00413405	0.283361	0.362899	21	-0.00183237	0.290845	0.396789	21	0.00245074	0.0146213	0.0469434
22	0.00361186	0.283019	0.457503	22	-0.000895149	0.311921	0.374573	22	-0.00554139	0.283958	0.367078	22	-0.000941559	0.292966	0.399718	22	0.0045768	0.0164221	0.0501833
23	0.0048859	0.290848	0.465213	23	-0.00067288	0.316365	0.374533	23	-0.00420369	0.287924	0.366126	23	3.11009e-06	0.298379	0.401957	23	0.00458234	0.0156449	0.0549419
24	0.00183046	0.289109	0.468065	24	-0.00106883	0.322013	0.378768	24	-0.00284155	0.292037	0.363754	24	-0.000693309	0.301053	0.403529	24	0.00235853	0.0182108	0.0563917
25	0.0021346	0.287854	0.466802	25	-0.00154495	0.319471	0.376516	25	-0.00538746	0.293727	0.368029	25	-0.00159927	0.300351	0.403782	25	0.00376133	0.0168169	0.0547416
26	0.00341424	0.29185	0.475443	26	-0.00209394	0.321922	0.382384	26	-0.00354033	0.292516	0.366873	26	-0.000740012	0.302096	0.408233	26	0.00366966	0.0171729	0.0587197
27	0.00432527	0.297067	0.477048	27	3.03646e-05	0.325329	0.379825	27	-0.00228692	0.297218	0.365781	27	0.000689569	0.306538	0.407551	27	0.00335502	0.0162735	0.0605942
28	0.00455513	0.292475	0.482988	28	-0.00167977	0.328094	0.383667	28	-0.00194608	0.297361	0.366853	28	0.000309757	0.305977	0.411169	28	0.00367901	0.0193094	0.0627622
29	0.00476116	0.294742	0.474728	29	7.04459e-05	0.331013	0.383126	29	-0.00420002	0.295242	0.371488	29	0.000210527	0.306999	0.409781	29	0.00448223	0.0207984	0.0565463
30	0.00824968	0.29825	0.486487	30	-0.00158382	0.326043	0.388649	30	-0.00393493	0.295805	0.373492	30	0.000910313	0.306699	0.416209	30	0.00646388	0.0167967	0.0613326
31	0.00223972	0.29719	0.48392	31	-0.000874501	0.330496	0.386858	31	-0.00430997	0.301903	0.368253	31	-0.000981584	0.309863	0.41301	31	0.00327616	0.018023	0.0621098
32	0.00299937	0.296509	0.497624	32	-0.000222269	0.33078	0.387599	32	-0.00389217	0.299161	0.372717	32	-0.000371687	0.308817	0.419314	32	0.0034482	0.0190669	0.0682261
33	0.00698406	0.299043	0.498387	33	-0.00154252	0.329655	0.390101	33	-0.00518956	0.301336	0.371586	33	8.39932e-05	0.310012	0.420025	33	0.00624767	0.0170504	0.0684921
34	0.00361467	0.296488	0.524679	34	-0.00250447	0.331132	0.389611	34	-0.00427088	0.301509	0.375948	34	-0.00105356	0.30971	0.430079	34	0.00413815	0.0187214	0.08221
35	0.00406738	0.2989	0.544316	35	-0.00055628	0.3358	0.393762	35	-0.00424278	0.300939	0.376778	35	-0.000243894	0.31188	0.438286	35	0.00416388	0.0207404	0.0922173
36	0.0053302	0.301481	0.542133	36	-0.002032	0.337769	0.391362	36	-0.00299304	0.304875	0.371901	36	0.000101721	0.314708	0.435132	36	0.00455342	0.0200429	0.0931749
37	0.00454251	0.299178	0.546472	37	-0.000536846	0.346794	0.39521	37	-0.00372969	0.305739	0.379255	37	9.19921e-05	0.317237	0.440312	37	0.0041718	0.0258066	0.0922823
38	0.0070191	0.303929	0.547773	38	-0.000609721	0.350989	0.395283	38	-0.0031604	0.307186	0.393604	38	0.00108299	0.320701	0.445553	38	0.00529665	0.0262806	0.0885288
39	0.00691118	0.30744	0.562393	39	-0.00298423	0.349384	0.395903	39	-0.00328867	0.307502	0.408029	39	0.000212756	0.321442	0.455442	39	0.005803	0.0241983	0.0928204
40	0.00564415	0.304814	0.55705	40	-0.00164455	0.358086	0.399955	40	-0.00476442	0.306609	0.412696	40	-0.00025494	0.32317	0.456567	40	0.00534162	0.030252	0.0872536

## Sheet: Figure 3B. R&QaQctm
	Replicate 1				Replicate 2				Replicate 3				Average				Standard Deviation
Time (min)	Buffer	Sec17/Sec18/ATP	Sec17/Sec18/ATP𝛾S	Time (min)	Buffer	Sec17/Sec18/ATP	Sec17/Sec18/ATP𝛾S	Time (min)	Buffer	Sec17/Sec18/ATP	Sec17/Sec18/ATP𝛾S	Time (min)	Buffer	Sec17/Sec18/ATP	Sec17/Sec18/ATP𝛾S	Time (min)	Buffer	Sec17/Sec18/ATP	Sec17/Sec18/ATP𝛾S
0	0.0192818	0.00227172	0.0300619	0	0	0.00907537	0.00811114	0	0	0.016947	0.00253555	0	0.00642726	0.00943136	0.0135695	0	0.0111323	0.00734411	0.0145523
1	0.0143471	0.0101173	0.0628138	1	-0.000843094	0.0165445	0.0245466	1	-0.00176709	0.0247554	0.0191187	1	0.0039123	0.0171391	0.0354931	1	0.00904859	0.0073371	0.0238156
2	0.0150385	0.0209514	0.0893593	2	0.00216467	0.0254067	0.0397296	2	-0.000869933	0.0309043	0.0308622	2	0.00544443	0.0257541	0.053317	2	0.00844616	0.00498552	0.0315269
3	0.00958945	0.0276671	0.10755	3	-0.00208593	0.0346904	0.0558574	3	-0.00198365	0.0393264	0.0474652	3	0.00183996	0.0338946	0.0702908	3	0.00671145	0.00587027	0.032539
4	0.00798222	0.0365415	0.132826	4	0.000846728	0.0448172	0.06267	4	-0.00384602	0.0452823	0.0595935	4	0.00166097	0.0422137	0.0850297	4	0.00595601	0.00491778	0.041421
5	0.00783549	0.0418539	0.150856	5	1.69588e-05	0.0557302	0.0774132	5	-0.00574057	0.0564034	0.0698817	5	0.00070396	0.0513292	0.0993836	5	0.00681405	0.00821268	0.0447351
6	0.00359562	0.0485713	0.166068	6	-0.000472423	0.0609293	0.0901444	6	-0.00580615	0.0636586	0.0787073	6	-0.000894318	0.0577197	0.11164	6	0.00471507	0.00803944	0.0474819
7	0.00370862	0.0558165	0.187129	7	-0.00282606	0.0725654	0.0966893	7	-0.00804843	0.0683176	0.0902973	7	-0.00238862	0.0655665	0.124705	7	0.00589072	0.00870678	0.0541551
8	0.00264106	0.0634462	0.200004	8	0.000165954	0.0768996	0.10766	8	-0.00798408	0.0736647	0.0945938	8	-0.00172569	0.0713368	0.134086	8	0.00555942	0.00702227	0.0574593
9	0.00135258	0.06575	0.21126	9	0.00144634	0.0837921	0.114174	9	-0.00736288	0.0794931	0.102458	9	-0.00152132	0.0763451	0.14263	9	0.00505915	0.00942402	0.0597227
10	9.44442e-05	0.0755772	0.22657	10	-0.000265284	0.0903746	0.119264	10	-0.00859539	0.0823157	0.108438	10	-0.00292208	0.0827558	0.151424	10	0.00491652	0.00740847	0.0653029
11	-0.000377777	0.0802876	0.23892	11	-0.000213196	0.0974694	0.12812	11	-0.011475	0.090655	0.117409	11	-0.00402197	0.0894707	0.161483	11	0.00645499	0.00865187	0.067276
12	-0.000532935	0.0852325	0.246101	12	-0.00031616	0.0999538	0.132182	12	-0.0110913	0.0937734	0.123402	12	-0.00398014	0.0929866	0.167228	12	0.00615943	0.00739216	0.068447
13	-0.00174216	0.0895432	0.257905	13	0.000310103	0.104695	0.137429	13	-0.0116333	0.0990004	0.126181	13	-0.00435513	0.0977462	0.173838	13	0.0063861	0.0076534	0.0730207
14	-0.0013121	0.0936835	0.265349	14	-0.000678351	0.111368	0.142485	14	-0.0122471	0.10608	0.133663	14	-0.00474586	0.103711	0.180499	14	0.00650401	0.00907734	0.0736147
15	0.000865176	0.0992827	0.280231	15	0.00109021	0.113533	0.146634	15	-0.0119142	0.110235	0.137489	15	-0.00331962	0.107684	0.188118	15	0.00744402	0.00745992	0.0799031
16	0.00129355	0.106427	0.289173	16	0.00149358	0.11814	0.153413	16	-0.0124761	0.113882	0.142402	16	-0.00322964	0.112816	0.194996	16	0.00800825	0.00592878	0.0817453
17	0.00324652	0.106941	0.287888	17	-0.000156263	0.118359	0.163325	17	-0.0106273	0.114737	0.147302	17	-0.00251235	0.113346	0.199505	17	0.00723077	0.0058347	0.0769598
18	0.00157013	0.110063	0.301746	18	-0.0022434	0.124077	0.164282	18	-0.0121296	0.115355	0.152567	18	-0.00426761	0.116498	0.206198	18	0.00707061	0.00707644	0.0829534
19	-0.0026984	0.10811	0.309635	19	-0.000155052	0.126986	0.166662	19	-0.0123053	0.122232	0.154151	19	-0.00505291	0.119109	0.21015	19	0.00640818	0.00981799	0.0863838
20	0.000632439	0.116087	0.31697	20	-0.00189938	0.130038	0.171715	20	-0.0143929	0.125065	0.159203	20	-0.00521994	0.12373	0.215962	20	0.00804423	0.00707042	0.0876983
21	5.22816e-05	0.117096	0.323093	21	0.00186062	0.130988	0.170787	21	-0.0163728	0.128464	0.162181	21	-0.00481997	0.125516	0.218687	21	0.0100458	0.00740078	0.0905207
22	-0.00307449	0.123987	0.333501	22	0.00306712	0.135946	0.176288	22	-0.0128547	0.129451	0.166803	22	-0.00428737	0.129795	0.225531	22	0.00802991	0.00598732	0.0936252
23	-0.00489254	0.124297	0.330661	23	0.00215377	0.138201	0.175991	23	-0.0141206	0.133532	0.169726	23	-0.00561981	0.13201	0.225459	23	0.00816154	0.00707574	0.091161
24	-0.000193948	0.126257	0.344804	24	0.00108294	0.138718	0.177007	24	-0.0110035	0.134274	0.172017	24	-0.0033715	0.133083	0.231276	24	0.00664026	0.00631549	0.0983497
25	0.000199007	0.128783	0.346597	25	0.000226521	0.140808	0.180898	25	-0.0137902	0.138941	0.170799	25	-0.0044549	0.136177	0.232765	25	0.00808465	0.00647109	0.0987107
26	-0.00123115	0.131793	0.35977	26	0.00350441	0.141414	0.18691	26	-0.0143409	0.140705	0.176542	26	-0.00402255	0.137971	0.241074	26	0.00924434	0.00536168	0.102924
27	-0.00293283	0.132977	0.360097	27	0.00227974	0.146311	0.188815	27	-0.0144288	0.145545	0.182217	27	-0.00502728	0.141611	0.24371	27	0.0085489	0.00748673	0.100848
28	-0.00314533	0.133583	0.355196	28	0.000106598	0.142558	0.187546	28	-0.0158333	0.143632	0.183291	28	-0.00629067	0.139924	0.242011	28	0.00842258	0.00551797	0.0980442
29	-0.00134077	0.13856	0.368491	29	-2.90722e-05	0.144313	0.191353	29	-0.0152047	0.145667	0.187412	29	-0.00552483	0.142847	0.249085	29	0.00840859	0.00377395	0.103427
30	-0.00430564	0.138285	0.372262	30	-0.000232578	0.149301	0.188477	30	-0.0149361	0.15095	0.189263	30	-0.00649145	0.146179	0.250001	30	0.00759157	0.00688593	0.105882
31	-0.00182648	0.140968	0.37152	31	-0.000157474	0.145111	0.193156	31	-0.0156675	0.148835	0.189566	31	-0.00588381	0.144972	0.251414	31	0.00851389	0.00393551	0.10403
32	-0.0044355	0.141415	0.373228	32	0.0010042	0.148816	0.197409	32	-0.0160808	0.149742	0.18739	32	-0.00650402	0.146658	0.252675	32	0.0087283	0.00456392	0.104522
33	-0.00173541	0.146918	0.377694	33	-0.00282969	0.149552	0.195245	33	-0.016374	0.149521	0.19157	33	-0.00697972	0.148664	0.254836	33	0.00815411	0.0015119	0.106414
34	-0.00293114	0.147117	0.379337	34	4.11856e-05	0.150892	0.198704	34	-0.0162763	0.156531	0.193602	34	-0.00638875	0.151513	0.257214	34	0.00869087	0.00473769	0.105792
35	-0.00065605	0.141629	0.374028	35	0.000703789	0.152841	0.201684	35	-0.0139449	0.157041	0.190894	35	-0.00463239	0.150504	0.255535	35	0.00809349	0.00796731	0.102759
36	-0.00179107	0.145312	0.381851	36	-7.38918e-05	0.148117	0.202168	36	-0.0166339	0.15715	0.192625	36	-0.00616629	0.150193	0.258882	36	0.0091058	0.00618576	0.106602
37	-0.00465137	0.142786	0.385985	37	-0.00228217	0.15379	0.198867	37	-0.0156625	0.156807	0.193258	37	-0.00753202	0.151128	0.25937	37	0.00714017	0.00737979	0.109688
38	-0.00566328	0.146248	0.388137	38	-0.000811599	0.151707	0.20159	38	-0.0174407	0.159718	0.194079	38	-0.00797187	0.152558	0.261269	38	0.00855157	0.00677469	0.109935
39	-0.0065352	0.142211	0.393529	39	0.000493016	0.153664	0.201097	39	-0.0140736	0.160757	0.197512	39	-0.00670527	0.15221	0.264046	39	0.0072848	0.00935799	0.11215
40	-0.00536308	0.147071	0.391019	40	0.00140273	0.153064	0.200863	40	-0.0155351	0.163276	0.194817	40	-0.00649847	0.154471	0.262233	40	0.00852578	0.00819356	0.111573

## Sheet: Figure 3C. R&QbQctm
	Replicate 1				Replicate 2				Replicate 3				Average				Standard Deviation
Time (min)	Buffer	Sec17/Sec18/ATP	Sec17/Sec18/ATP𝛾S	Time (min)	Buffer	Sec17/Sec18/ATP	Sec17/Sec18/ATP𝛾S	Time (min)	Buffer	Sec17/Sec18/ATP	Sec17/Sec18/ATP𝛾S	Time (min)	Buffer	Sec17/Sec18/ATP	Sec17/Sec18/ATP𝛾S	Time (min)	Buffer	Sec17/Sec18/ATP	Sec17/Sec18/ATP𝛾S
0	0.00524834	0.0199827	0.00994175	0	0.00256503	0.00254924	0.00990063	0	0	0.0247752	0.0123443	0	0.00260446	0.0157691	0.0107289	0	0.00262439	0.0116968	0.00139916
1	0.00181279	0.0198633	0.0117394	1	0.00295124	0.00356942	0.0181665	1	-0.000862756	0.0253339	0.0170821	1	0.00130042	0.0162555	0.0156627	1	0.00195794	0.0113219	0.00344065
2	-4.03589e-05	0.0199693	0.0196481	2	0.00463576	0.00669434	0.0214724	2	-0.000645213	0.0223637	0.0190511	2	0.00131673	0.0163424	0.0200572	2	0.00289023	0.00844082	0.00126144
3	0.00493892	0.0199188	0.0179547	3	0.000839222	0.00533531	0.0305703	3	-0.00240039	0.0233068	0.0260941	3	0.00112592	0.016187	0.024873	3	0.00367805	0.00954926	0.00639582
4	0.00324385	0.0206184	0.0185685	4	0.00333867	0.010084	0.0352789	4	-0.00356845	0.023931	0.0351419	4	0.00100469	0.0182111	0.0296631	4	0.00396074	0.00723054	0.00960845
5	-0.00294284	0.0176839	0.0227893	5	0.00030484	0.0122228	0.0419526	5	-0.00306414	0.0257072	0.0383655	5	-0.00190071	0.018538	0.0343691	5	0.00191103	0.00678265	0.0101875
6	-0.00218947	0.0157047	0.0231273	6	0.0028808	0.0104192	0.0461487	6	-0.00588973	0.0251027	0.0435976	6	-0.0017328	0.0170755	0.0376246	6	0.00440306	0.00743713	0.0126196
7	-0.00361885	0.0161032	0.0305786	7	0.000908448	0.0119179	0.0565218	7	-0.00625931	0.0283066	0.0461624	7	-0.0029899	0.0187759	0.0444209	7	0.00362503	0.00851495	0.013059
8	-0.0066979	0.0153734	0.031258	8	0.002395	0.0158238	0.0605758	8	-0.0066054	0.0271731	0.0543932	8	-0.0036361	0.0194568	0.0487423	8	0.00522329	0.00668636	0.0154542
9	-0.00456729	0.0180438	0.0441375	9	1.9432e-05	0.0181204	0.066188	9	-0.00901568	0.0256108	0.0567046	9	-0.00452118	0.0205916	0.0556767	9	0.00451773	0.00434684	0.0110611
10	-0.00496415	0.0149294	0.0446538	10	-0.00141247	0.0192936	0.0700258	10	-0.00867824	0.0266799	0.0567305	10	-0.00501829	0.020301	0.0571367	10	0.00363319	0.00593967	0.0126909
11	-0.00478926	0.0135253	0.0535008	11	-0.000111734	0.0188709	0.0764165	11	-0.00816776	0.0271076	0.0635399	11	-0.00435625	0.0198346	0.0644857	11	0.00404543	0.00684225	0.0114871
12	-0.00588568	0.00988121	0.0497323	12	0.000340061	0.0194114	0.0806163	12	-0.00961021	0.0280519	0.0678413	12	-0.00505194	0.0191149	0.0660633	12	0.00502726	0.00908899	0.0155186
13	-0.00415697	0.00975677	0.0607469	13	0.00114163	0.0208384	0.0856188	13	-0.0119426	0.0290704	0.0718411	13	-0.00498599	0.0198886	0.0727356	13	0.0065814	0.00969181	0.0124601
14	-0.00574947	0.0154625	0.0573921	14	0.00184726	0.0220724	0.088049	14	-0.0108228	0.0264834	0.0747879	14	-0.00490833	0.0213394	0.0734097	14	0.00637676	0.00554688	0.0153749
15	-0.0059109	0.0115191	0.0683562	15	0.00100075	0.0218076	0.0915772	15	-0.0120761	0.0272114	0.0753107	15	-0.00566209	0.0201794	0.0784147	15	0.00654198	0.00797186	0.0119176
16	-0.005097	0.0097635	0.0663097	16	0.00161043	0.024669	0.0978367	16	-0.0112455	0.0279086	0.0796171	16	-0.00491069	0.0207803	0.0812545	16	0.00642999	0.00967739	0.0158272
17	-0.00614801	0.00910935	0.074701	17	0.00182175	0.0247674	0.0999075	17	-0.0132355	0.0285402	0.0797172	17	-0.00585393	0.0208056	0.0847752	17	0.00753294	0.0103034	0.0133427
18	-0.00386437	0.00842829	0.0729504	18	-0.00013481	0.0251293	0.105684	18	-0.0121478	0.0266911	0.0870543	18	-0.00538233	0.0200829	0.0885628	18	0.00614867	0.0101233	0.0164187
19	-0.00379374	0.00842997	0.0768686	19	0.000534381	0.0264446	0.105397	19	-0.0137077	0.0286737	0.0865883	19	-0.00565568	0.0211827	0.089618	19	0.00730132	0.0111003	0.0145035
20	-0.00619846	0.0100864	0.0798585	20	0.0020683	0.0259503	0.110848	20	-0.0126484	0.0284141	0.0863795	20	-0.00559285	0.0214836	0.0923619	20	0.00737702	0.00994686	0.0163378
21	-0.00219452	0.0105236	0.084367	21	-0.000426291	0.0253406	0.111706	21	-0.013149	0.0292818	0.0956263	21	-0.0052566	0.0217153	0.0972332	21	0.00689196	0.00989063	0.0137403
22	-0.00214911	0.012856	0.0885122	22	0.0039192	0.0294444	0.118527	22	-0.014652	0.0294252	0.0944693	22	-0.00429398	0.0239085	0.100503	22	0.00946958	0.00957178	0.015891
23	-0.00181111	0.00967605	0.0975694	23	0.00301804	0.0286465	0.115774	23	-0.0144592	0.0290581	0.0970069	23	-0.00441742	0.0224602	0.10345	23	0.00902542	0.0110733	0.0106764
24	-0.00342378	0.00991316	0.0982521	24	-0.00147076	0.0286987	0.120032	24	-0.0142454	0.0302397	0.100339	24	-0.00637997	0.0229505	0.106208	24	0.00688127	0.011317	0.0120174
25	-0.00293611	0.0112585	0.102539	25	-0.000179746	0.0272207	0.123115	25	-0.0152762	0.0286353	0.100766	25	-0.00613069	0.0223715	0.108807	25	0.00803927	0.00965013	0.0124235
26	-0.000277468	0.0119412	0.102969	26	-0.00109062	0.0286173	0.124777	26	-0.0170413	0.0297787	0.102224	26	-0.00613646	0.0234457	0.10999	26	0.00945261	0.00998013	0.0128111
27	-0.00325226	0.0110029	0.104108	27	0.000437221	0.0300067	0.127107	27	-0.0174801	0.0288381	0.106749	27	-0.00676504	0.0232825	0.112655	27	0.00946109	0.0106506	0.0125859
28	5.71751e-05	0.00785317	0.10686	28	-0.000732345	0.026209	0.131067	28	-0.0161674	0.0301606	0.105702	28	-0.00561419	0.0214076	0.114543	28	0.00914787	0.0119036	0.0143215
29	-0.00393668	0.0102562	0.106699	29	0.000446937	0.0294043	0.131463	29	-0.0151106	0.0299839	0.10937	29	-0.00620011	0.0232148	0.115844	29	0.00802194	0.0112262	0.0135921
30	-0.00375338	0.00983244	0.116214	30	7.52992e-05	0.0269571	0.131126	30	-0.0159313	0.030943	0.109658	30	-0.00653647	0.0225775	0.118999	30	0.00835836	0.0112161	0.011002
31	-0.00386269	0.00945576	0.114216	31	-0.0012813	0.0286222	0.135218	31	-0.0167817	0.03376	0.111774	31	-0.00730857	0.023946	0.120403	31	0.0083049	0.0128091	0.0128885
32	-0.00492715	0.00945408	0.115243	32	-0.000591463	0.0281024	0.135551	32	-0.0164888	0.0299295	0.115999	32	-0.0073358	0.0224953	0.122264	32	0.00821781	0.0113309	0.0115126
33	-0.00593613	0.00734532	0.121319	33	-0.00245451	0.027047	0.134569	33	-0.016825	0.0335375	0.114195	33	-0.00840521	0.0226433	0.123361	33	0.00749666	0.0136401	0.0103394
34	-0.00608243	0.0139121	0.121418	34	0.000842865	0.0297735	0.135367	34	-0.0174541	0.0330777	0.118969	34	-0.00756456	0.0255878	0.125251	34	0.0092381	0.0102455	0.00884577
35	-0.00450507	0.00574106	0.119298	35	0.000914521	0.0261592	0.14178	35	-0.0181092	0.0337291	0.115078	35	-0.00723326	0.0218764	0.125385	35	0.00980092	0.0144772	0.0143542
36	-0.00254598	0.0079238	0.123616	36	-0.0013651	0.0279615	0.138332	36	-0.0174504	0.0334102	0.119252	36	-0.0071205	0.0230985	0.127067	36	0.00896544	0.0134211	0.00999706
37	-0.00439071	0.00652133	0.122521	37	-0.00197964	0.0287777	0.14036	37	-0.0188224	0.0348168	0.11989	37	-0.00839759	0.0233719	0.12759	37	0.0091083	0.0149022	0.0111369
38	-0.00281335	0.00552749	0.128663	38	-0.00089266	0.0238844	0.140292	38	-0.0182922	0.0335189	0.121319	38	-0.00733273	0.020977	0.130091	38	0.00953961	0.0142204	0.00956708
39	-0.00494565	0.00847706	0.126769	39	-0.000127523	0.0275789	0.143775	39	-0.0194429	0.033273	0.117926	39	-0.00817203	0.0231097	0.12949	39	0.0100538	0.0129881	0.0131379
40	-0.00684588	0.00579991	0.126697	40	-0.00227355	0.0278437	0.144736	40	-0.017464	0.0356993	0.121063	40	-0.00886115	0.0231143	0.130832	40	0.00779317	0.0155006	0.0123665

## Sheet: Figure 3-supplement1
	t=30' Average				t=30' Stdev				t=30'
	Buffer	Sec17/Sec18/ATP	Sec17/Sec18/ATP𝛾S		Buffer	Sec17/Sec18/ATP	Sec17/Sec18/ATP𝛾S
R&Qab	0.000910313	0.306699	0.416209	Qab	0.00646388	0.0167967	0.0613326
R&Qac-tm	-0.00649145	0.146179	0.250001	Qac	0.00759157	0.00688593	0.105882
R&Qbc-tm	-0.00653647	0.0225775	0.118999	Qbc	0.00835836	0.0112161	0.011002
