# Supplementary material for: Sec17/Sec18 can support membrane fusion without help from completion of SNARE zippering
Source: eLife journal article supplement (doi:10.7554/elife.67578), 2021-05-04
Supplement: supp [file elife-67578-supp-v1.zip › elife_poa_e67578_Figure_4_source_data_1.xlsx]

## Sheet: Figure 4A_R&Qa_No 17&18
	Replicate 1								Replicate 2								Replicate 3								Average								Stdev
sQb	w.t.	3Δ	w.t.	3Δ	w.t.	None		sQb	w.t.	3Δ	w.t.	3Δ	w.t.	None		sQb	w.t.	3Δ	w.t.	3Δ	w.t.	None		sQb	w.t.	3Δ	w.t.	3Δ	w.t.	None		sQb	w.t.	3Δ	w.t.	3Δ	w.t.	None
Qc	w.t.	w.t.	3Δ	3Δ	None	w.t.		Qc	w.t.	w.t.	3Δ	3Δ	None	w.t.		Qc	w.t.	w.t.	3Δ	3Δ	None	w.t.		Qc	w.t.	w.t.	3Δ	3Δ	None	w.t.		Qc	w.t.	w.t.	3Δ	3Δ	None	w.t.
0	0.134672	0.00892314	0.00972266	0.0132079	0.0101043	0.0131589		0	0.0868625	0.000372927	0.0118999	0	0.0207193	0.00176331		0	0.0984481	0.0201884	0.018755	0.00403936	0.00492437	0		0	0.106661	0.00982814	0.0134592	0.00574908	0.011916	0.00497406		0	0.0249406	0.00993867	0.00471371	0.0067679	0.0080518	0.00714287
1	0.173452	0.00396727	0.00470843	0.00842242	0.00290279	0.00700662		1	0.123986	-0.00192937	0.0188561	0.00173095	0.0200424	0.00169436		1	0.154309	0.0171659	0.0134477	0.00103789	-0.00158909	-0.000831715		1	0.150583	0.00640125	0.0123374	0.00373042	0.0071187	0.00262309		1	0.0249425	0.00977753	0.00713886	0.00407814	0.0114154	0.00400085
2	0.211225	0.00171343	0.00408632	0.00618609	0.00142397	0.00630981		2	0.158719	-0.0011019	0.0113764	0.00231356	0.0171941	-0.00291587		2	0.193443	0.0165936	0.0109778	0.0020323	-0.00152317	-0.00312209		2	0.187796	0.00573505	0.0088135	0.00351065	0.00569829	9.06184e-05		2	0.0267043	0.00950857	0.00409871	0.00232126	0.0100641	0.00538697
3	0.242594	0.00376301	0.0043466	0.00465707	0.00288062	0.00334282		3	0.190681	-0.000515062	0.0120857	0.000481287	0.0175754	-0.00160711		3	0.220735	0.016351	0.0114701	-0.000276303	5.18945e-05	-0.00124126		3	0.218004	0.00653297	0.00930078	0.00162069	0.00683598	0.000164819		3	0.0260639	0.00876757	0.00430147	0.00265673	0.00940757	0.0027583
4	0.271616	0.00169592	0.00437578	0.0047236	0.002241	0.00473878		4	0.214121	-0.00191108	0.0104349	0.000826069	0.0178161	-0.00169295		4	0.246196	0.0150718	0.0111377	-0.000281913	-0.00256106	-0.00459757		4	0.243978	0.00495223	0.00864947	0.00175592	0.00583201	-0.000517248		4	0.0288117	0.00894749	0.00371776	0.00262912	0.0106526	0.00477792
5	0.29401	0.00454269	0.00565969	0.0062958	0.00233204	0.00722839		5	0.237058	0.000354633	0.0111076	0.00320577	0.0186647	-0.00183368		5	0.267007	0.0119175	0.0110605	-0.00108558	-0.0046663	-0.00266065		5	0.266025	0.00560494	0.00927595	0.00280533	0.00544347	0.000911355		5	0.0284885	0.00585417	0.00313186	0.00370695	0.0119726	0.00548631
6	0.32213	0.00246043	0.00545193	0.00494304	0.00182081	0.00679186		6	0.25204	-0.00214609	0.00873917	0.00119196	0.0158797	-0.00157896		6	0.282602	0.0134757	0.0113116	0.00271254	-0.00211365	0.000575047		6	0.28559	0.00459669	0.0085009	0.00294918	0.00519561	0.00192932		6	0.0351403	0.00802702	0.00293709	0.0018867	0.00945949	0.00434663
7	0.340144	0.00333699	0.00465591	0.00713735	0.00375717	0.00465941		7	0.271405	0.00106108	0.00793561	-8.58437e-05	0.0150466	-0.00261612		7	0.296287	0.00856119	0.0115781	-0.000980385	-0.00558918	-0.000357651		7	0.302612	0.00431975	0.00805654	0.00202371	0.00440485	0.000561879		7	0.0348031	0.00384542	0.00346267	0.00445107	0.0103331	0.00372391
8	0.353186	0.0044248	0.00439096	0.00625145	0	0.00476679		8	0.288958	0.00113004	0.00923594	0.00276529	0.0142458	-0.000748669		8	0.313802	0.0120171	0.0089497	-0.000116412	-0.00420906	-0.00206877		8	0.318649	0.00585731	0.00752553	0.00296678	0.00334559	0.000649785		8	0.032387	0.0055831	0.00271839	0.00318871	0.00967163	0.00362601
9	0.365012	0.00167491	0.00192236	0.00511344	0.00228885	0.00464424		9	0.303536	-0.000925986	0.00865614	0.000565724	0.0147975	-0.00107375		9	0.324506	0.0097225	0.00892305	-0.00133523	-0.00351761	-0.000489491		9	0.331018	0.00349048	0.00650051	0.00144798	0.00452291	0.001027		9	0.0312509	0.00555156	0.00396705	0.00331363	0.00935969	0.00314621
10	0.385319	0.00332882	0.00601801	0.00747583	0.00471077	0.00484733		10	0.315043	0.000782444	0.00899529	0.00102168	0.0129751	0.000374335		10	0.334598	0.00952615	0.00770142	-0.00134785	-0.00671823	-0.00278407		10	0.344987	0.0045458	0.00757158	0.00238322	0.00365586	0.00081253		10	0.0362712	0.0044971	0.00149288	0.00456669	0.00988894	0.00383452
11	0.397014	0.0024791	0.00458354	0.00671716	0.00110766	0.00406765		11	0.321797	-0.00174361	0.00495782	-5.34764e-05	0.0119041	0.00113426		11	0.345703	0.00841673	0.00892024	-0.000824702	-0.00392294	0.000987398		11	0.354838	0.00305074	0.00615387	0.00194633	0.00302961	0.0020631		11	0.0384315	0.00510423	0.00240305	0.00414962	0.00808668	0.00173754
12	0.408139	0.00317008	0.00472827	0.00790069	0.00431392	0.0050154		12	0.335722	0.00109767	0.00669018	0.000886582	0.0110091	0.000454549		12	0.353456	0.00898757	0.00812359	-0.000645175	-0.00617264	0.00273218		12	0.365773	0.00441844	0.00651401	0.00271403	0.00305013	0.00273404		12	0.0377471	0.0040904	0.0017045	0.0045566	0.00866031	0.00228043
13	0.410191	0.0032086	0.00400228	0.00516363	0.00102012	0.00447616		13	0.349019	0.000676898	0.00578108	0.00201662	0.0119112	-0.00239096		13	0.360597	0.00557235	0.00611794	-0.00407302	-0.0060969	-0.00229598		13	0.373269	0.00315261	0.00530043	0.00103575	0.00227813	-7.02592e-05		13	0.0324954	0.0024482	0.00113678	0.0046958	0.0090697	0.0039376
14	0.422739	0.00343853	0.00700429	0.00380036	0.00350389	0.00779097		14	0.357844	9.56946e-05	0.00546444	-0.000372927	0.0119224	-0.00063468		14	0.369717	0.00502816	0.00577712	-0.000855558	-0.00235208	-0.00245447		14	0.383433	0.00285413	0.00608195	0.000857291	0.00435808	0.00156727		14	0.0345531	0.00251763	0.000813923	0.00256017	0.00717548	0.00546614
15	0.425849	0.00347822	0.00401395	0.00642069	0.000556748	0.0038809		15	0.360082	-0.00035604	0.00536171	0.00153111	0.0102886	0.00118352		15	0.376437	0.0026354	0.00551765	0.000190747	-0.00312068	-0.0021417		15	0.387456	0.00191919	0.00496444	0.00271418	0.00257488	0.000974237		15	0.0342403	0.00201497	0.000826827	0.00327915	0.00692869	0.00301675
16	0.438468	0.00359377	0.00449717	0.00544259	0.00180447	0.00728441		16	0.371793	0.00313118	0.00466793	0.000115396	0.0125332	-0.000783851		16	0.378943	0.00620069	0.00660603	-0.00101825	-0.00243483	-0.00173636		16	0.396401	0.00430855	0.00525704	0.00151324	0.0039676	0.00158807		16	0.0366054	0.00165489	0.00117137	0.0034498	0.0077149	0.00495612
17	0.441228	0.0017286	0.0048625	0.00553713	0.00133876	0.00626663		17	0.372797	-0.00165214	0.00402621	-0.00024768	0.00918949	0.000657197		17	0.385607	0.00209822	0.0060394	-0.00287524	-0.00405198	-0.003512		17	0.399877	0.000724895	0.00497604	0.000804739	0.00215876	0.00113728		17	0.0363792	0.00206685	0.00101139	0.0043038	0.00665871	0.00490696
18	0.441298	0.00289929	0.00409916	0.00830803	0.00341636	0.00396727		18	0.385893	0.00013932	0.00293276	-0.000177316	0.011496	0.00308334		18	0.387712	0.00205194	0.00612355	-0.000350639	-0.00409826	-0.000861168		18	0.404968	0.00169685	0.00438516	0.00259336	0.0036047	0.00206315		18	0.0314762	0.00141383	0.00161451	0.00494981	0.00779885	0.00257081
19	0.44696	0.00570638	0.00430692	0.00534922	0.00424856	0.00737078		19	0.392992	0.000826069	0.00534482	0.00266256	0.0125008	0.00191389		19	0.394395	0.00295238	0.00506042	-0.00399307	-0.00454147	-0.00177984		19	0.411449	0.00316161	0.00490405	0.00133957	0.0040693	0.00250161		19	0.0307613	0.00244687	0.000536329	0.00480961	0.00852255	0.00460354
20	0.457062	0.0040443	0.00287245	0.0066623	0.00435711	0.00431042		20	0.39504	0.00101042	0.00464963	-0.00225445	0.0119703	0.000972426		20	0.39822	0.00595104	0.00667475	0.000614319	-0.006261	-0.00244325		20	0.416774	0.00366859	0.00473228	0.00167406	0.00335546	0.000946532		20	0.0349267	0.00249164	0.0019025	0.00455186	0.00915682	0.00337691
21	0.461682	0.00288178	0.00774312	0.00559666	0.00282226	0.00692492		21	0.399922	0.00102168	0.00459334	0.000765557	0.0104997	0.00164088		21	0.403076	0.00407582	0.00650645	0.00100002	-0.00407302	-0.00129175		21	0.42156	0.00265976	0.00628097	0.00245408	0.00308297	0.00242468		21	0.0347825	0.00153913	0.00158695	0.00272408	0.00728984	0.00416403
22	0.467012	0.00278024	0.00308721	0.00633432	0.00189434	0.0084551		22	0.405696	0.00194907	0.00644109	0.00257672	0.012567	0.00463415		22	0.404804	0.00208139	0.00273358	-9.81788e-05	-0.00421748	-0.00130578		22	0.425837	0.00227023	0.00408729	0.00293762	0.0034146	0.00392782		22	0.0356615	0.000446604	0.0020461	0.0032314	0.00849486	0.00491862
23	0.475738	0.00106331	0.00466758	0.00437928	0.00196904	0.00669265		23	0.409593	-0.00113145	-4.644e-05	-0.000879546	0.00500145	0.00353648		23	0.409668	0.000844338	0.00421608	0.00100002	-0.00426517	0.00045583		23	0.431666	0.000258732	0.00294574	0.00149992	0.000901775	0.00356165		23	0.0381675	0.0012089	0.00260112	0.00266482	0.0047246	0.00311849
24	0.472533	0.00512745	0.00533754	0.00327629	0.00542625	0.00584644		24	0.413456	0.00275685	0.00472985	0.000683935	0.00904595	0.0022643		24	0.417913	0.00379952	0.00348394	-0.000251057	-0.00458355	0.00164099		24	0.434634	0.00389461	0.00451711	0.00123639	0.00329622	0.00325058		24	0.0328972	0.00118816	0.000944934	0.00182742	0.00706	0.00226958
25	0.465902	0.00140996	0.00578574	0.00456487	0.00265885	0.00555231		25	0.404618	-0.00115115	0.00101324	-0.00253309	0.00684498	0.00241066		25	0.422014	0.00437597	0.000743354	-0.00200705	-0.00329179	0.00245307		25	0.430845	0.00154493	0.00251411	8.24003e-06	0.00207068	0.00347201		25	0.0315821	0.00276603	0.00283653	0.00395491	0.00509392	0.00180171
26	0.477403	0.0035926	0.00577757	0.00628063	0.00634599	0.00522083		26	0.410229	0.00186886	0.00218831	-0.000675491	0.00838453	0.00281736		26	0.421942	0.0030758	0.00143622	-0.00226092	-0.0057645	-0.00301689		26	0.436524	0.00284575	0.00313403	0.00111474	0.00298868	0.00167376		26	0.0358829	0.000884597	0.00232005	0.00454348	0.00764869	0.00423626
27	0.484609	0.00283626	0.00544959	0.00444698	0.00196904	0.0061394		27	0.411267	-0.00260768	0.00384045	-0.00170562	0.00734175	0.00132284		27	0.418919	0.000949529	0.00155543	-0.00176862	-0.00604501	-0.00322728		27	0.438265	0.000392705	0.00361516	0.000324248	0.00108859	0.00141165		27	0.0403169	0.00276436	0.00195683	0.00357053	0.00673667	0.00468397
28	0.490829	0.00308021	0.00421238	0.00588379	0.00334399	0.00574839		28	0.41422	0.000458771	0.00112582	-0.00171969	0.00370535	0.0061329		28	0.419587	0.00149091	0.00419364	2.10383e-05	-0.00326374	0.000392715		28	0.441545	0.00167663	0.00317728	0.00139505	0.00126187	0.00409134		28	0.0427653	0.00132055	0.00177664	0.00398361	0.00392345	0.00320886
29	0.486039	0.00127924	0.00384821	0.00611489	0.00206125	0.00361361		29	0.408399	-0.00154237	0.0053012	0.000740226	0.00875183	0.00763024		29	0.423909	0.00332125	-0.00012062	-0.0029664	-0.00398886	-0.00182332		29	0.439449	0.00101937	0.0030096	0.00129624	0.00227474	0.00314018		29	0.0410863	0.0024422	0.00280651	0.00456611	0.00637303	0.00474453
30	0.492689	0.00324945	0.00443297	0.00474228	0.00432209	0.00783999		30	0.41852	0.00157333	0.00374335	0.00100901	0.00666766	0.00866036		30	0.423333	0.00147829	0.00243764	-0.00184436	-0.00410247	-0.00328478		30	0.444847	0.00210036	0.00353799	0.00130231	0.00229576	0.00440519		30	0.0415021	0.000996276	0.0010134	0.0033031	0.00566378	0.00667233
31	0.483226	0.00177412	0.00153835	0.00535622	0.000905737	0.00344553		31	0.419363	-0.0020321	0.00234592	-0.00286943	0.00566005	0.00806368		31	0.420943	0.00201126	0.00244465	-0.00129035	-0.0047771	9.53737e-05		31	0.441177	0.000584428	0.00210964	0.000398813	0.00059623	0.00386819		31	0.0364236	0.00226908	0.000497209	0.00436524	0.00522546	0.00400093
32	0.501923	0.000620943	0.00552663	0.00454152	0.00359143	0.00588262		32	0.412484	-0.000121026	-0.00125107	-0.000381371	0.00677039	0.0101661		32	0.422676	0.00481076	0.004066	-0.00116131	-0.00489912	0.00294396		32	0.445695	0.00177023	0.00278052	0.000999612	0.0018209	0.00633091		32	0.0489611	0.00265919	0.00356702	0.00309207	0.00603287	0.0036319
33	0.49471	0.00148349	0.00246276	0.00630631	0.00218497	0.0040478		33	0.423095	0.00213906	0.00397836	-0.00101464	0.00753032	0.00803131		33	0.423236	0.00297341	0.000194955	-0.00191869	-0.00115009	0.00102807		33	0.447014	0.00219865	0.00221203	0.00112432	0.00285507	0.00436906		33	0.041306	0.000746746	0.00190413	0.00451044	0.00437883	0.00351265
34	0.51747	0.00200756	0.00278724	0.00698328	0.00534338	0.00825785		34	0.420665	0.00146356	0.00328598	-0.00248524	0.00710392	0.00922749		34	0.419877	-0.00135627	0.000781223	-0.00232263	-0.00442927	-0.00129456		34	0.452671	0.000704952	0.00228482	0.000725134	0.00267268	0.00539693		34	0.0561192	0.00180567	0.00132581	0.00542032	0.00621314	0.00581524
35	0.5361	0.00134693	0.00235772	0.00296115	0.00335333	0.00505158		35	0.4207	0.00247117	0.0030369	0.000855622	0.00467778	0.00652412		35	0.427653	0.00504358	0.00161855	0.00057645	-0.00429743	0.00167605		35	0.461484	0.0029539	0.00233772	0.00146441	0.00124456	0.00441725		35	0.0647128	0.00189501	0.000709386	0.00130371	0.00484497	0.0024855
36	0.573556	0.000212428	0.00413884	0.00497222	0.00233321	0.00621293		36	0.419799	0.000409517	0.00204477	0.000104138	0.00315089	0.00974537		36	0.423542	-0.000572242	0.00297341	-0.00195236	-0.0041754	-0.000890622		36	0.472299	1.65675e-05	0.00305234	0.00104133	0.000436229	0.00502256		36	0.0877107	0.000519359	0.00104927	0.00355615	0.00401466	0.00541699
37	0.592004	0.000311639	0.00168542	0.00393459	0.0012734	0.00360427		37	0.430285	-0.000298342	-0.00074304	-0.00117648	0.00367298	0.0119731		37	0.433667	0.00185558	0.00256948	-0.00111924	-0.00480094	-0.00156806		37	0.485319	0.000622959	0.00117062	0.000546289	4.84805e-05	0.00466977		37	0.0924077	0.0011102	0.00171521	0.00293449	0.00436774	0.00683316
38	0.565223	-0.000462206	0.00223166	0.00362295	0.00294598	0.00420304		38	0.436732	0.00323391	0.00152689	0.000436255	0.00613571	0.0146736		38	0.428814	-0.000166904	0.00354846	-0.00331283	-0.00403515	-0.00297482		38	0.476923	0.000868268	0.00243567	0.00024879	0.00168218	0.00530062		38	0.0765725	0.00205402	0.00102611	0.00347169	0.00520187	0.00887528
39	0.547023	-0.00127574	0.00117536	0.00371282	0.000122555	0.00768126		39	0.43042	0.000600906	-0.000136506	-0.00160007	0.00467778	0.00888693		39	0.452493	0.0025246	-0.000213188	-0.00352181	-0.00695667	0.000959347		39	0.476646	0.000616589	0.000275221	-0.000469687	-0.000718779	0.00584251		39	0.0619399	0.00190021	0.000780483	0.00374744	0.00586267	0.0042717
40	0.602813	0.000716653	0.00181147	0.00359143	0.00486483	0.00572972		40	0.437009	-0.000821848	0.001935	0.000213906	0.00563613	0.0119196		40	0.455178	-0.000523153	0.00207999	-0.00151055	-0.00385001	0.000248252		40	0.498333	-0.000209449	0.00194215	0.000764929	0.00221698	0.00596586		40	0.0909372	0.000815814	0.0001344	0.00259524	0.00526831	0.00583926

## Sheet: Figure 4B_R&Qa_17,18,&AMP-PNP
	Replicate 1								Replicate 2								Replicate 3								Average								Stdev
sQb	w.t.	3Δ	w.t.	3Δ	w.t.	None		sQb	w.t.	3Δ	w.t.	3Δ	w.t.	None		sQb	w.t.	3Δ	w.t.	3Δ	w.t.	None		sQb	w.t.	3Δ	w.t.	3Δ	w.t.	None		sQb	w.t.	3Δ	w.t.	3Δ	w.t.	None
Qc	w.t.	w.t.	3Δ	3Δ	None	w.t.		Qc	w.t.	w.t.	3Δ	3Δ	None	w.t.		Qc	w.t.	w.t.	3Δ	3Δ	None	w.t.		Qc	w.t.	w.t.	3Δ	3Δ	None	w.t.		Qc	w.t.	w.t.	3Δ	3Δ	None	w.t.
0	0.244733	0.0811431	0.154221	0.0345472	0.0023685	0		0	0.165257	0.0453425	0.152764	0.0238156	0	0.0033672		0	0.118014	0.00858152	0.0748824	0.00345163	0	0.00401673		0	0.176001	0.0450224	0.127289	0.0206048	0.000789501	0.00246131		0	0.0640392	0.0362819	0.0453913	0.0157945	0.00136746	0.00215616
1	0.332139	0.15501	0.210477	0.10915	-0.0017746	-0.00417985		1	0.245021	0.12331	0.232628	0.0977708	-0.00141859	0.00223205		1	0.200807	0.0861815	0.170057	0.0795324	-0.00357374	-0.000384777		1	0.259322	0.1215	0.204387	0.0954845	-0.00225564	-0.000777526		1	0.066824	0.0344499	0.0317265	0.0149407	0.0011553	0.00322394
2	0.393634	0.208426	0.268839	0.171622	-0.00440153	-0.00750974		2	0.303191	0.178745	0.291291	0.159949	-0.00312203	-6.37728e-05		2	0.264637	0.154642	0.231068	0.152137	-0.0077424	-0.000553738		2	0.320487	0.180604	0.263733	0.161236	-0.00508865	-0.00270908		2	0.0662147	0.0269401	0.0304348	0.00980562	0.00238559	0.0041647
3	0.44427	0.241993	0.314289	0.223209	-0.00190144	-0.00470974		3	0.352229	0.229965	0.337803	0.207626	0.00266003	0.00191177		3	0.311865	0.201014	0.280027	0.20253	-0.00691037	-0.00185147		3	0.369454	0.224324	0.310706	0.211122	-0.00205059	-0.00154982		3	0.0678622	0.0210636	0.0290543	0.0107737	0.00478694	0.00332104
4	0.48172	0.279017	0.352375	0.260987	-0.0021812	-0.00276444		4	0.379071	0.260104	0.378041	0.249672	0.00200247	-0.00025084		4	0.341977	0.244345	0.314729	0.23789	-0.00723409	-0.00381511		4	0.400923	0.261155	0.348382	0.249516	-0.00247094	-0.0022768		4	0.0723887	0.0173602	0.0318442	0.0115492	0.00462509	0.00183149
5	0.513276	0.31195	0.384403	0.296388	-0.00186114	-0.00405656		5	0.412029	0.296429	0.410119	0.286173	-0.000372717	-0.000834715		5	0.370126	0.271486	0.341089	0.272448	-0.00513131	-0.00335792		5	0.43181	0.293288	0.378537	0.285003	-0.00245505	-0.00274973		5	0.0735969	0.0204138	0.0348869	0.0120128	0.00243426	0.00169485
6	0.536135	0.340881	0.411478	0.324627	-0.00278933	-0.00468129		6	0.425919	0.321704	0.432615	0.304188	-0.000965095	0.00203931		6	0.394391	0.299861	0.366298	0.302229	-0.00719292	-0.00428366		6	0.452148	0.320815	0.403464	0.310348	-0.00364911	-0.00230855		6	0.0744235	0.0205245	0.0338772	0.0124049	0.0032017	0.0037706
7	0.557524	0.369166	0.434024	0.351651	-0.00353853	-0.00485673		7	0.435218	0.342753	0.451343	0.33162	0.000435072	-0.00267846		7	0.40792	0.322727	0.388135	0.318037	-0.00589518	-0.00430638		7	0.466888	0.344882	0.424501	0.33377	-0.00299955	-0.00394719		7	0.0796713	0.0232927	0.0326623	0.0169098	0.00319936	0.00113269
8	0.518693	0.385812	0.447496	0.374056	-0.0023768	-0.00554547		8	0.450339	0.369006	0.476075	0.352315	-0.00166801	0.00247864		8	0.414868	0.339768	0.403114	0.345442	-0.00663066	-0.00418711		8	0.4613	0.364862	0.442229	0.357271	-0.00355849	-0.00241798		8	0.0527731	0.0233002	0.0367646	0.0149372	0.00268408	0.00429464
9	0.524404	0.404217	0.458063	0.392307	-0.0034271	-0.00484725		9	0.46108	0.383053	0.486961	0.37403	-0.00172612	-0.000982101		9	0.431338	0.358584	0.414168	0.360269	-0.0071702	-0.00419989		9	0.472274	0.381952	0.453064	0.375536	-0.0041078	-0.00334308		9	0.0475321	0.0228367	0.036653	0.016072	0.00278514	0.00207013
10	0.532033	0.422972	0.48237	0.412338	-0.00224996	-0.00406249		10	0.464017	0.403493	0.495112	0.386694	-0.00326092	0.000333036		10	0.428984	0.368406	0.415734	0.371895	-0.00956121	-0.00510717		10	0.475011	0.398291	0.464405	0.390309	-0.00502403	-0.00294554		10	0.0523972	0.0276525	0.0426294	0.0204622	0.0039617	0.00288698
11	0.534012	0.436309	0.481963	0.421605	-0.00345081	-0.00426876		11	0.463424	0.407086	0.504266	0.395407	-0.00150646	-0.00100903		11	0.444571	0.386644	0.434158	0.387807	-0.00611952	-0.00538972		11	0.480669	0.410013	0.473462	0.401606	-0.00369226	-0.00355583		11	0.0471484	0.0249617	0.0358187	0.0177315	0.00231599	0.0022757
12	0.544133	0.450512	0.488086	0.433149	-0.00387282	-0.0061785		12	0.473064	0.427455	0.519887	0.41078	0.000916911	0.000279183		12	0.451109	0.396266	0.436358	0.401976	-0.00829613	-0.00391876		12	0.489435	0.424744	0.481444	0.415302	-0.00375068	-0.00327269		12	0.048625	0.0272243	0.0421586	0.016071	0.00460774	0.00327696
13	0.540577	0.451367	0.487295	0.44147	-0.00445961	-0.00630178		13	0.477991	0.437229	0.524718	0.427507	0.000826212	-0.000221079		13	0.456713	0.409597	0.4428	0.40714	-0.00888111	-0.00469116		13	0.49176	0.432731	0.484938	0.425372	-0.0041715	-0.00373801		13	0.0435944	0.021245	0.0410099	0.0172644	0.00486007	0.00315041
14	0.550723	0.461412	0.499403	0.454173	-0.00291736	-0.00247756		14	0.483248	0.445487	0.527881	0.429104	-0.00248572	0.00222213		14	0.453573	0.418318	0.447435	0.418216	-0.00620755	-0.00658522		14	0.495848	0.441739	0.491573	0.433831	-0.00387021	-0.00228022		14	0.0497858	0.0217903	0.040791	0.0184386	0.00203567	0.00440699
15	0.550133	0.465827	0.501779	0.453267	-0.0036464	-0.00626266		15	0.485541	0.450541	0.534684	0.439237	-0.00171903	-0.00390148		15	0.454953	0.420108	0.457856	0.423885	-0.00871073	-0.00279425		15	0.496875	0.445492	0.498106	0.438797	-0.00469205	-0.00431946		15	0.0485918	0.0232736	0.0385453	0.0146959	0.00361123	0.00177158
16	0.557142	0.472329	0.507362	0.465193	-0.00291262	-0.00523489		16	0.486693	0.457884	0.540034	0.446706	-0.000423735	-1.13374e-05		16	0.461649	0.425988	0.464856	0.430155	-0.00627428	-0.00456195		16	0.501828	0.452067	0.504084	0.447351	-0.00320354	-0.00326939		16	0.0495132	0.0237119	0.0376959	0.0175276	0.0029361	0.00284155
17	0.551873	0.471941	0.505162	0.461747	-0.00239458	-0.00170703		17	0.486552	0.453942	0.5409	0.444567	-0.00157023	-0.0020053		17	0.464077	0.431855	0.462892	0.439863	-0.00577308	-0.00527471		17	0.500834	0.452579	0.502985	0.448725	-0.00324596	-0.00299568		17	0.0456072	0.020078	0.0390491	0.0115193	0.00222702	0.00197933
18	0.56135	0.479489	0.510357	0.469773	-0.00484369	-0.00344132		18	0.491898	0.46486	0.547198	0.448983	-0.000572538	-0.000104871		18	0.468886	0.431645	0.464463	0.439388	-0.0101874	-0.00627144		18	0.507378	0.458664	0.507339	0.452715	-0.0052012	-0.00327254		18	0.0481369	0.0245165	0.0414498	0.0155323	0.00481737	0.00308675
19	0.569919	0.48287	0.513145	0.470397	-0.00226063	-0.00176867		19	0.487469	0.469059	0.553371	0.458551	-0.0015518	-0.000165809		19	0.46765	0.435994	0.466134	0.443655	-0.00758337	-0.00762171		19	0.508346	0.462641	0.510883	0.457534	-0.0037986	-0.0031854		19	0.0542365	0.0240882	0.0436624	0.0133998	0.00329681	0.00392466
20	0.59281	0.477135	0.512713	0.473092	-0.00271228	-0.00304183		20	0.493522	0.464761	0.558619	0.461729	-0.00210025	0.00161274		20	0.469067	0.436844	0.475424	0.444036	-0.00987642	-0.00440151		20	0.518466	0.45958	0.515585	0.459619	-0.00489632	-0.00194353		20	0.065534	0.0206389	0.0416716	0.0146429	0.00432374	0.00315397
21	0.578665	0.487787	0.514219	0.475025	-0.000199153	-0.00337494		21	0.500391	0.471878	0.570082	0.458325	-0.000840384	-0.000171478		21	0.475999	0.444101	0.475346	0.445467	-0.00572764	-0.00518384		21	0.518352	0.467922	0.519882	0.459606	-0.00225573	-0.00291009		21	0.0536378	0.0221101	0.0476213	0.0148205	0.00302381	0.00253831
22	0.583607	0.481791	0.515644	0.476173	-0.00519103	-0.00352549		22	0.504626	0.473394	0.568608	0.467406	3.11778e-05	0.00557516		22	0.47348	0.442555	0.47692	0.441758	-0.00833021	-0.00439157		22	0.520571	0.465913	0.520391	0.461779	-0.00449669	-0.000780633		22	0.0567686	0.0206603	0.0460278	0.0178844	0.00422372	0.00552129
23	0.585669	0.479824	0.513174	0.469888	-0.00475123	-0.00144979		23	0.494239	0.463291	0.579554	0.450936	-0.00488358	-0.0037626		23	0.493198	0.446206	0.489202	0.454041	-0.0048303	-0.00448102		23	0.524368	0.463107	0.52731	0.458288	-0.0048217	-0.00323113		23	0.05309	0.0168097	0.0468055	0.0101649	6.6592e-05	0.00158396
24	0.597538	0.487783	0.520064	0.480493	2.48942e-05	-0.0057387		24	0.514631	0.469318	0.590373	0.459632	-0.00454629	-0.00262035		24	0.484174	0.447614	0.482465	0.451136	-0.00669029	-0.00384777		24	0.532115	0.468238	0.530967	0.463754	-0.00373723	-0.00406894		24	0.0586694	0.0201067	0.0547741	0.0151063	0.00342992	0.00157089
25	0.625796	0.479027	0.526199	0.475918	-0.00243726	-0.00232583		25	0.518831	0.462183	0.605317	0.459232	-0.00618029	-0.0045222		25	0.48232	0.44475	0.489299	0.453977	-0.00828194	-0.00137867		25	0.542316	0.461986	0.540272	0.463043	-0.00563316	-0.00274223		25	0.074565	0.0171393	0.0592757	0.0114562	0.0029605	0.00161261
26	0.612308	0.490231	0.534302	0.483329	-0.000790686	-0.00232464		26	0.528304	0.468771	0.632567	0.462955	-0.00725168	-0.00207332		26	0.483463	0.445741	0.494992	0.448069	-0.00960807	-0.00624304		26	0.541358	0.468248	0.553954	0.464784	-0.00588348	-0.003547		26	0.0654068	0.0222499	0.0708612	0.0177007	0.00456514	0.00233822
27	0.628312	0.492532	0.540361	0.479586	-0.00358476	-0.00476546		27	0.535279	0.467066	0.628796	0.460542	-0.00613919	-0.00464833		27	0.524518	0.445399	0.515394	0.450392	-0.00636657	-0.00745275		27	0.562703	0.468332	0.561517	0.463507	-0.00536351	-0.00562218		27	0.0570734	0.0235924	0.0595874	0.0148211	0.00154463	0.0015864
28	0.666244	0.492445	0.554202	0.488131	-2.25233e-05	-0.00200102		28	0.54918	0.468696	0.662703	0.46497	-0.00375551	-0.00154614		28	0.537582	0.452927	0.525777	0.454119	-0.00747405	-0.00182308		28	0.584335	0.471356	0.580894	0.469073	-0.00375069	-0.00179008		28	0.0711716	0.0198928	0.0722599	0.0173731	0.00372576	0.000229229
29	0.704946	0.491444	0.565379	0.488738	-3.7934e-05	-0.00300508		29	0.551703	0.465367	0.639281	0.467183	-0.00996981	-0.00630784		29	0.52818	0.457165	0.553947	0.455843	-0.00494247	-0.00493111		29	0.594943	0.471325	0.586202	0.470588	-0.00498341	-0.00474801		29	0.0959889	0.0178995	0.0463218	0.0167097	0.00496607	0.00165897
30	0.731252	0.505992	0.572495	0.501324	0.000200339	-0.00116766		30	0.54656	0.467606	0.62848	0.473259	-0.00692431	-0.00524638		30	0.532712	0.453201	0.570745	0.454474	-0.00954843	-0.00430212		30	0.603508	0.4756	0.590573	0.476352	-0.00542413	-0.00357205		30	0.110846	0.0272882	0.0328396	0.0235773	0.00504455	0.00213512
31	0.808487	0.50144	0.577056	0.500367	-0.001579	-0.00495157		31	0.544095	0.472887	0.66023	0.47784	-0.0130578	-0.0047617		31	0.589974	0.461196	0.577062	0.459756	-0.00839978	-0.00341472		31	0.647519	0.478507	0.604783	0.479321	-0.00767887	-0.004376		31	0.141277	0.0207024	0.0480187	0.0203459	0.00577327	0.000837887
32	0.836241	0.505177	0.591539	0.50673	-0.000683997	-0.00454615		32	0.565693	0.477701	0.823534	0.480019	-0.0136346	-0.00957726		32	0.627486	0.462393	0.5409	0.467095	-0.00339484	-0.00586962		32	0.676474	0.481757	0.651991	0.484615	-0.00590449	-0.00666434		32	0.141771	0.0216789	0.150703	0.0202133	0.00683033	0.00260801
33	0.810472	0.508412	0.620262	0.513082	-0.00394039	-0.00845335		33	0.599171	0.483746	0.949858	0.496276	-0.00920029	-0.00783272		33	0.675119	0.471417	0.577759	0.458346	-0.00651139	-0.00617347		33	0.694921	0.487859	0.71596	0.489235	-0.00655069	-0.00748651		33	0.107033	0.0188373	0.203673	0.028039	0.00263017	0.00117871
34	0.838255	0.516805	0.601383	0.519947	0.00213497	-0.00611804		34	0.583969	0.481207	1.01245	0.497982	-0.0154642	-0.00867735		34	0.628612	0.468159	0.56668	0.464413	-0.00737182	-0.00913242		34	0.683612	0.488724	0.726838	0.494114	-0.00690035	-0.00797594		34	0.135772	0.0251794	0.247957	0.0279682	0.00880905	0.001625
35	0.94585	0.521707	0.611879	0.508635	-0.000915157	-0.0090188		35	0.606641	0.484136	0.950406	0.504329	-0.0130862	-0.0109958		35	0.635937	0.475556	0.602477	0.469902	-0.00684364	-0.00948312		35	0.729476	0.4938	0.721587	0.494289	-0.00694832	-0.00983259		35	0.187957	0.0245463	0.198219	0.021229	0.00608619	0.00103382
36	0.863882	0.5349	0.617851	0.519329	4.86029e-05	-0.0107685		36	0.65759	0.495975	1.00657	0.503955	-0.0136672	-0.0111914		36	0.693854	0.484	0.608317	0.47427	-0.00763165	-0.0142169		36	0.738442	0.504958	0.744245	0.499185	-0.00708342	-0.0120589		36	0.110137	0.0266125	0.227229	0.0229054	0.00687433	0.00188076
37	0.936912	0.532107	0.6153	0.522267	-0.00459594	-0.0136527		37	0.65129	0.49358	1.0246	0.506818	-0.0163329	-0.0136559		37	0.762644	0.500132	0.613654	0.477021	-0.0115405	-0.0118685		37	0.783615	0.508606	0.751185	0.502035	-0.0108231	-0.013059		37	0.143961	0.020614	0.236787	0.0229987	0.00590128	0.00103105
38	0.934827	0.533017	0.64419	0.523991	-0.00208163	-0.0127826		38	0.654346	0.496505	1.04379	0.523209	-0.0186217	-0.0114607		38	0.82046	0.493852	0.607089	0.475043	-0.0116597	-0.0133337		38	0.803211	0.507792	0.765024	0.507415	-0.0107877	-0.0125257		38	0.141034	0.0218864	0.242133	0.028037	0.00830443	0.00096259
39	0.957602	0.544606	0.612047	0.517474	-0.00619983	-0.01462		39	0.682468	0.489174	1.00991	0.5187	-0.0179315	-0.0140144		39	0.881693	0.478753	0.601142	0.477568	-0.0118869	-0.0129575		39	0.840588	0.504178	0.741035	0.50458	-0.0120061	-0.013864		39	0.142098	0.0353974	0.232921	0.0234016	0.00586674	0.00084141
40	0.864892	0.541172	0.619973	0.519864	-0.00230093	-0.0110601		40	0.695343	0.50693	1.0625	0.54194	-0.0216927	-0.0150858		40	0.918521	0.491819	0.629135	0.488417	-0.0142978	-0.0132471		40	0.826252	0.513307	0.770537	0.51674	-0.0127638	-0.013131		40	0.116498	0.025287	0.252892	0.0268978	0.00978646	0.00201535

## Sheet: Figure 4C_R&Qa_17,18,&ATPgammaS
	Replicate 1								Replicate 2								Replicate 3								Average								Stdev
sQb	w.t.	3Δ	w.t.	3Δ	w.t.	None		sQb	w.t.	3Δ	w.t.	3Δ	w.t.	None		sQb	w.t.	3Δ	w.t.	3Δ	w.t.	None		sQb	w.t.	3Δ	w.t.	3Δ	w.t.	None		sQb	w.t.	3Δ	w.t.	3Δ	w.t.	None
Qc	w.t.	w.t.	3Δ	3Δ	None	w.t.		Qc	w.t.	w.t.	3Δ	3Δ	None	w.t.		Qc	w.t.	w.t.	3Δ	3Δ	None	w.t.		Qc	w.t.	w.t.	3Δ	3Δ	None	w.t.		Qc	w.t.	w.t.	3Δ	3Δ	None	w.t.
0	0.169795	0.0336538	0.119578	0.017464	0	0.00903493		0	0.141337	0.03965	0.134944	0.0832037	0.0141322	0		0	0.108432	0.0380288	0.068539	0.00628352	0	0.0157011		0	0.139855	0.0371109	0.107687	0.0356504	0.00471075	0.00824534		0	0.0307087	0.00310172	0.0347627	0.04156	0.00815925	0.00788028
1	0.287673	0.144593	0.223399	0.131112	-0.00915752	-0.00219007		1	0.254451	0.149709	0.254107	0.153245	0.00944082	-0.00387533		1	0.230051	0.140814	0.203046	0.117548	-0.00297441	-0.000434119		1	0.257391	0.145039	0.226851	0.133969	-0.000897037	-0.00216651		1	0.0289232	0.00446438	0.0257051	0.0180192	0.0094716	0.00172073
2	0.366179	0.220712	0.293263	0.20504	-0.00872493	-0.00278179		2	0.321009	0.220252	0.333106	0.239689	0.00710572	-0.00571824		2	0.314893	0.226901	0.271687	0.202724	-0.00635074	-0.00155163		2	0.334027	0.222622	0.299352	0.215818	-0.00265665	-0.00335055		2	0.028012	0.0037135	0.031159	0.0207057	0.00853739	0.00214074
3	0.419518	0.275479	0.343294	0.265807	-0.00659497	-0.00155828		3	0.376265	0.275724	0.39843	0.310923	0.00880436	-0.00159398		3	0.365258	0.283634	0.322938	0.262398	-0.00487334	0.000653979		3	0.387014	0.278279	0.354887	0.27971	-0.000887981	-0.000832758		3	0.0286824	0.00463902	0.039058	0.0270855	0.00843784	0.00128768
4	0.454307	0.313249	0.39003	0.311422	-0.00577575	-0.00288316		4	0.403841	0.310683	0.438188	0.35703	0.00618498	-0.00790342		4	0.404383	0.317288	0.361551	0.304232	-0.00464507	-0.000684788		4	0.420844	0.31374	0.39659	0.324228	-0.00141195	-0.00382379		4	0.0289812	0.00332969	0.0387375	0.028634	0.00660338	0.0037001
5	0.48636	0.357042	0.426828	0.345396	-0.0063993	-0.0041385		5	0.434742	0.349855	0.471709	0.400329	0.00843097	-0.00198717		5	0.43153	0.35693	0.387308	0.334382	-0.00346875	-0.0021776		5	0.450877	0.354609	0.428615	0.360036	-0.000479027	-0.00276776		5	0.0307709	0.00411742	0.0422285	0.0353268	0.00785418	0.00119091
6	0.50565	0.38322	0.441322	0.381807	-0.00597967	-0.00229616		6	0.453373	0.371026	0.492962	0.433995	0.00537738	-0.00364762		6	0.454994	0.386404	0.414753	0.365453	-0.00397149	-0.00159784		6	0.471339	0.380217	0.449679	0.393751	-0.00152459	-0.00251387		6	0.0297249	0.00811669	0.0397687	0.0357983	0.00606103	0.00104209
7	0.521212	0.403776	0.465858	0.410559	-0.00496715	-0.000825108		7	0.467289	0.393892	0.50453	0.468662	0.0042657	-0.00704915		7	0.460564	0.406499	0.429264	0.387153	-0.00404151	-0.00169306		7	0.483022	0.401389	0.466551	0.422125	-0.00158099	-0.00318911		7	0.0332446	0.00663373	0.037638	0.0419673	0.00508448	0.00337094
8	0.529164	0.424127	0.477554	0.427292	-0.00503905	-0.00118226		8	0.479971	0.410405	0.531532	0.49615	0.00531373	-0.00416669		8	0.471529	0.425508	0.44203	0.40598	-0.00387906	-0.00139898		8	0.493555	0.420013	0.483705	0.44314	-0.00120146	-0.00224931		8	0.0311261	0.00834965	0.0450669	0.0471282	0.00567205	0.00166403
9	0.540712	0.442885	0.49282	0.447465	-0.00878622	-0.00363283		9	0.488692	0.434056	0.539272	0.513179	0.00936162	-0.00283861		9	0.476985	0.442189	0.451522	0.417208	-0.00331611	0.000464927		9	0.50213	0.43971	0.494538	0.459284	-0.00091357	-0.00200217		9	0.0339222	0.00490908	0.0439007	0.049065	0.00930941	0.00217316
10	0.545842	0.45147	0.502472	0.461127	-0.00792339	-0.00212878		10	0.493698	0.443601	0.545176	0.525934	0.00340435	-0.00341425		10	0.478132	0.453072	0.454101	0.428924	-0.00515621	0.000938257		10	0.50589	0.449381	0.500583	0.471995	-0.00322508	-0.00153492		10	0.0354636	0.00506902	0.0455668	0.0494097	0.00590562	0.0022362
11	0.555584	0.461453	0.506993	0.474489	-0.00687433	-0.00260498		11	0.495949	0.453299	0.544955	0.533725	0.00230116	-0.00595585		11	0.486194	0.461083	0.465331	0.444465	-0.00468428	-0.00125894		11	0.512576	0.458612	0.50576	0.484226	-0.00308582	-0.00327326		11	0.0375644	0.00460458	0.0398266	0.0454199	0.00479204	0.00241871
12	0.561329	0.469537	0.513191	0.480839	-0.00511213	-0.000426699		12	0.499355	0.456294	0.555692	0.542934	0.00168167	-0.0044142		12	0.490879	0.469325	0.470934	0.445622	-0.00386926	-0.00193953		12	0.517188	0.465052	0.513272	0.489798	-0.00243324	-0.00226014		12	0.0384616	0.00758552	0.0423791	0.049271	0.00361739	0.00201299
13	0.556666	0.473217	0.510243	0.476342	-0.00653721	-0.00156417		13	0.508594	0.463883	0.560469	0.559673	0.00101834	-0.00301258		13	0.49658	0.470074	0.477132	0.451335	-0.00189472	0.000459326		13	0.520613	0.469058	0.515948	0.495783	-0.0024712	-0.00137247		13	0.0317951	0.00474918	0.0419607	0.0567252	0.00381062	0.00174387
14	0.569016	0.479978	0.515998	0.491016	-0.00667394	0.000111979		14	0.508004	0.473764	0.56893	0.557011	0.00337465	-0.00348639		14	0.498819	0.475237	0.468588	0.45507	-0.00487474	-0.000221261		14	0.52528	0.476326	0.517839	0.501032	-0.00272468	-0.00119856		14	0.0381538	0.00324727	0.0501963	0.0517035	0.00535823	0.00198831
15	0.570573	0.480742	0.517155	0.487021	-0.00475026	6.95448e-05		15	0.512453	0.481609	0.567499	0.560782	0.000213568	-0.00512987		15	0.49927	0.478482	0.476685	0.458091	-0.00586621	0.00153202		15	0.527432	0.480278	0.520446	0.501965	-0.00346763	-0.0011761		15	0.0379378	0.0016146	0.0454962	0.0529514	0.00323647	0.00350127
16	0.572331	0.482628	0.520657	0.49608	-0.00391926	-0.00324032		16	0.516726	0.485623	0.577446	0.562847	0.00229408	-0.000773652		16	0.498842	0.474914	0.481348	0.46045	-0.00480752	0.00449803		16	0.5293	0.481055	0.526484	0.506459	-0.00214423	0.000161355		16	0.0383242	0.00552536	0.048313	0.0519813	0.00386927	0.003953
17	0.576166	0.48825	0.516797	0.491963	-0.00620481	-0.0011634		17	0.514685	0.479792	0.57942	0.564659	-0.000275799	-0.00478193		17	0.499479	0.474068	0.473947	0.461079	-0.00357658	0.0014578		17	0.53011	0.480703	0.523388	0.5059	-0.0033524	-0.00149585		17	0.0406036	0.00713519	0.0530445	0.0531776	0.00297086	0.00313312
18	0.577779	0.482372	0.528648	0.500971	-0.00632858	-0.00151113		18	0.52074	0.489298	0.596818	0.579632	0.00422185	-0.00465606		18	0.499931	0.477936	0.474907	0.467555	-0.0021902	-0.000560153		18	0.532817	0.483202	0.533458	0.516053	-0.00143231	-0.00224245		18	0.0403047	0.00572626	0.061098	0.0575409	0.00531589	0.00214365
19	0.580777	0.487286	0.527953	0.497222	-0.00288316	0.000564609		19	0.51776	0.49305	0.598361	0.578628	-0.000362075	-0.00352033		19	0.503292	0.484695	0.48131	0.471847	-0.00285958	-0.00104189		19	0.533943	0.488344	0.535875	0.515899	-0.00203494	-0.00133254		19	0.0411993	0.00427654	0.0589261	0.0557871	0.00144879	0.00205792
20	0.585798	0.491474	0.529171	0.502106	-0.00504848	0.000436128		20	0.525468	0.49192	0.610221	0.580768	0.00380744	-0.00690205		20	0.505362	0.486028	0.481435	0.469465	-0.00466048	-0.000960663		20	0.538876	0.489807	0.540276	0.517446	-0.00196717	-0.00247553		20	0.0418608	0.00328038	0.0651069	0.0572154	0.00500473	0.00389658
21	0.602865	0.49102	0.527966	0.501993	-0.0054186	0.00158892		21	0.52198	0.495074	0.595692	0.582907	0.000673233	-0.00508319		21	0.513291	0.488062	0.485149	0.476207	-0.00450503	0.0025501		21	0.546046	0.491385	0.536269	0.520369	-0.00308347	-0.000314724		21	0.0493986	0.00352025	0.0557375	0.0556726	0.00328531	0.00415749
22	0.601224	0.486284	0.532851	0.499246	-0.00392869	-0.000569324		22	0.538434	0.499713	0.605113	0.582509	0.00309037	-0.00259676		22	0.518549	0.488748	0.486668	0.481973	-0.00430338	0.00221681		22	0.552736	0.491582	0.541544	0.521243	-0.0017139	-0.000316424		22	0.0431531	0.00714872	0.0596992	0.0537568	0.00416483	0.00241673
23	0.578476	0.484555	0.534699	0.500179	-0.00494711	0.000551643		23	0.542419	0.486192	0.597835	0.584607	0.000227711	-0.00333222		23	0.517368	0.497367	0.491647	0.488367	-0.00142279	0.00215239		23	0.546088	0.489371	0.541394	0.524384	-0.0020474	-0.000209396		23	0.0307189	0.00697284	0.0534098	0.0524875	0.00264335	0.00282039
24	0.605667	0.495514	0.528882	0.504733	-0.00304111	0.000398409		24	0.573984	0.497849	0.612912	0.586233	0.00237046	-0.00393615		24	0.528684	0.497275	0.481899	0.495201	-0.00362699	0.00196894		24	0.569445	0.496879	0.541231	0.528722	-0.00143255	-0.000522934		24	0.0386916	0.00121676	0.066374	0.0500335	0.0033065	0.00305846
25	0.629048	0.496309	0.530951	0.504194	-0.00178931	0.00237395		25	0.593547	0.493088	0.621947	0.586636	0.000475223	-0.00301823		25	0.545587	0.507919	0.4873	0.510328	-0.00454004	0.00213839		25	0.589394	0.499106	0.546733	0.533719	-0.00195138	0.000498035		25	0.0418854	0.00780092	0.0686969	0.04593	0.00251156	0.00304746
26	0.637514	0.485882	0.538474	0.510673	-0.00230323	0.00337115		26	0.609767	0.491614	0.632194	0.588894	0.00251755	-0.00484841		26	0.566515	0.501975	0.4973	0.515522	-0.00388466	0.00107129		26	0.604599	0.493157	0.555989	0.538363	-0.00122345	-0.00013532		26	0.0357801	0.00815625	0.0691318	0.043828	0.0033349	0.00424055
27	0.642784	0.502091	0.54665	0.509051	-0.0027924	0.00349728		27	0.619657	0.495122	0.598301	0.613387	0.00151336	-0.00568854		27	0.591057	0.512717	0.50171	0.529821	-0.0072904	-0.000836029		27	0.617833	0.50331	0.548887	0.550753	-0.00285648	-0.0010091		27	0.0259115	0.0088606	0.0483341	0.0552279	0.00440223	0.00459535
28	0.669034	0.512782	0.560836	0.521852	-0.00136614	0.00369648		28	0.629484	0.50158	0.612206	0.618326	0.00121352	-0.00619488		28	0.611025	0.522371	0.499346	0.540992	-0.00908709	0.00236105		28	0.636514	0.512244	0.557463	0.56039	-0.00307991	-4.57819e-05		28	0.0296365	0.0104061	0.0565058	0.0510786	0.00535988	0.00536697
29	0.724604	0.511608	0.585612	0.531959	-0.00220304	0.00330515		29	0.655892	0.48795	0.592059	0.606921	0.00259251	-0.00384563		29	0.645934	0.524585	0.494181	0.547	-0.00456105	-0.000637175		29	0.675476	0.508048	0.557284	0.56196	-0.00139052	-0.000392553		29	0.0428358	0.0185754	0.0547435	0.0396571	0.00364534	0.00358166
30	0.745135	0.532242	0.61767	0.551418	0.00157713	0.00614587		30	0.652784	0.487879	0.587512	0.61039	0.00351467	-0.00497429		30	0.657998	0.50655	0.492928	0.565871	-0.00867818	-0.00358638		30	0.685306	0.50889	0.566037	0.575893	-0.00119546	-0.000804932		30	0.051879	0.0222738	0.0650847	0.0307369	0.00655224	0.00605944
31	0.738779	0.516365	0.629782	0.535847	-0.00151584	0.00387447		31	0.65718	0.504983	0.618916	0.655462	0.00265757	-0.00537596		31	0.690666	0.557841	0.50438	0.590808	-0.00847792	-0.00228543		31	0.695542	0.526397	0.58436	0.594039	-0.0024454	-0.00126231		31	0.0410174	0.0278205	0.0694768	0.0598726	0.00562564	0.00470932
32	0.70642	0.522621	0.608456	0.527904	-0.00151348	0.00289613		32	0.674	0.517776	0.696707	0.689992	0.0021088	-0.00651735		32	0.705403	0.591725	0.535186	0.621871	-0.00904228	0.000376703		32	0.695274	0.544041	0.61345	0.613256	-0.00281565	-0.00108151		32	0.0184311	0.0413671	0.0808762	0.0813866	0.00568844	0.00487321
33	0.791946	0.539676	0.613879	0.565609	-0.00306822	0.00328275		33	0.73207	0.544844	0.691802	0.688811	0.00442269	-0.00567156		33	0.739992	0.589211	0.538365	0.622812	-0.007303	-0.00323069		33	0.754669	0.55791	0.614682	0.625744	-0.00198284	-0.00187317		33	0.0325243	0.0272305	0.0767218	0.0616532	0.00593772	0.00462894
34	0.730084	0.584174	0.664659	0.580844	-0.00180699	0.00535966		34	0.775789	0.517262	0.674854	0.65816	0.00345668	-0.00983118		34	0.742206	0.591031	0.551446	0.617615	-0.0124788	-0.00760688		34	0.74936	0.564156	0.630319	0.618873	-0.00360971	-0.00402613		34	0.0236777	0.0407553	0.0684964	0.0386734	0.00811926	0.00820407
35	0.638154	0.628371	0.686609	0.584622	-0.00206041	0.00263681		35	0.784465	0.546689	0.750383	0.704267	0.00355569	-0.0110419		35	0.756515	0.620586	0.588244	0.669169	-0.0122786	-0.00415634		35	0.726378	0.598549	0.675079	0.652686	-0.00359443	-0.00418713		35	0.077672	0.0450801	0.0816824	0.061502	0.00802781	0.00683939
36	0.613608	0.661977	0.680411	0.557756	-0.00255548	0.00531723		36	0.687891	0.607126	0.725151	0.759721	0.00425862	-0.0104733		36	0.748032	0.649424	0.602937	0.700944	-0.0115952	-0.00544889		36	0.683177	0.639509	0.6695	0.672807	-0.00329734	-0.00353499		36	0.0673358	0.0287381	0.0618336	0.103881	0.00795289	0.00806737
37	0.592954	0.63645	0.681741	0.60018	-0.00392398	0.00324503		37	0.619851	0.607876	0.685032	0.750409	0.00282871	-0.0126967		37	0.740935	0.685234	0.640156	0.711378	-0.00989791	-0.00638715		37	0.651247	0.643187	0.668976	0.687322	-0.00366439	-0.0052796		37	0.0788277	0.0391168	0.0250131	0.0779499	0.00636728	0.00802835
38	0.524198	0.643143	0.692324	0.630009	-0.00159482	0.00502962		38	0.649974	0.657453	0.747027	0.829604	0.00594312	-0.0152015		38	0.750629	0.661795	0.656267	0.743646	-0.0120615	-0.00908009		38	0.641601	0.65413	0.69854	0.73442	-0.00257107	-0.00641732		38	0.113448	0.00975961	0.0456979	0.100117	0.00904193	0.0103751
39	0.581631	0.634731	0.652454	0.64957	-0.00302932	0.00386268		39	0.728461	0.62881	0.775014	0.870768	0.00803778	-0.0146287		39	0.750012	0.625596	0.648364	0.717425	-0.0143413	-0.0106093		39	0.686701	0.629712	0.691944	0.745921	-0.00311096	-0.0071251		39	0.091629	0.00463364	0.0719701	0.113319	0.0111898	0.0097256
40	0.723752	0.709639	0.632181	0.651526	-7.66172e-05	0.00883455		40	0.704801	0.589273	0.825217	0.915416	0.00348639	-0.0144632		40	0.809832	0.602708	0.62812	0.74661	-0.0160078	-0.00931675		40	0.746128	0.633873	0.695173	0.771184	-0.00419934	-0.0049818		40	0.0559768	0.0659578	0.11264	0.13365	0.0103804	0.0122389

## Sheet: Figure 4D_R&Qa_17,18,&ATP
	Replicate 1								Replicate 2								Replicate 3								Average								Stdev
sQb	w.t.	3Δ	w.t.	3Δ	w.t.	None		sQb	w.t.	3Δ	w.t.	3Δ	w.t.	None		sQb	w.t.	3Δ	w.t.	3Δ	w.t.	None		sQb	w.t.	3Δ	w.t.	3Δ	w.t.	None		sQb	w.t.	3Δ	w.t.	3Δ	w.t.	None
Qc	w.t.	w.t.	3Δ	3Δ	None	w.t.		Qc	w.t.	w.t.	3Δ	3Δ	None	w.t.		Qc	w.t.	w.t.	3Δ	3Δ	None	w.t.		Qc	w.t.	w.t.	3Δ	3Δ	None	w.t.		Qc	w.t.	w.t.	3Δ	3Δ	None	w.t.
0	0.138158	0.0067674	0.0539926	0	0.00464131	0.0113665		0	0.129495	0.00551955	0.045092	0.0496632	0	0.00546986		0	0.117005	0.00323447	0.0492713	0	0.00506357	0.00161017		0	0.128219	0.00517381	0.049452	0.0165544	0.00323496	0.00614885		0	0.0106345	0.00179166	0.00445306	0.0286731	0.0028095	0.00491349
1	0.22267	0.0183111	0.0998953	-0.000555776	0.00375334	0.00587836		1	0.222467	0.0177582	0.0951583	0.0213329	-0.000759506	0.00284211		1	0.226994	0.0146992	0.130637	0.00404097	0.00402826	0.000855935		1	0.224044	0.0169228	0.108564	0.0082727	0.0023407	0.00319214		1	0.00255673	0.00194548	0.0192626	0.0115416	0.00268837	0.00252944
2	0.283605	0.0376821	0.145219	0.00360991	0.00342957	0.00793695		2	0.288079	0.0324174	0.140193	0.011536	-0.00278533	0.00309055		2	0.298484	0.0428674	0.189708	0.0115551	0.00178532	-0.00164266		2	0.290056	0.0376556	0.158374	0.00890033	0.000809853	0.00312828		2	0.00763387	0.00522501	0.0272527	0.00458165	0.00322023	0.00478992
3	0.329067	0.0561703	0.189014	0.00690449	0.00464026	0.00345488		3	0.341199	0.0526529	0.190038	0.0180251	0.00138699	0.00225297		3	0.348296	0.0704776	0.237337	0.0239746	0.00231922	-0.00173023		3	0.339521	0.059767	0.205463	0.0163014	0.00278215	0.00132587		3	0.00972373	0.00944094	0.0276084	0.00866464	0.00167531	0.00271403
4	0.361265	0.0819101	0.227971	0.0120025	0.00779669	0.00294235		4	0.376522	0.0760599	0.218515	0.0220796	-0.00153605	0.00213514		4	0.379493	0.0994353	0.280667	0.0334436	0.00194351	-0.00438702		4	0.372427	0.0858018	0.242384	0.0225086	0.00273472	0.000230154		4	0.0097795	0.0121639	0.0334896	0.010727	0.00471641	0.00401891
5	0.383654	0.100489	0.261463	0.015972	0.00714178	0.00218198		5	0.403356	0.0961492	0.255187	0.0259709	-0.00148636	0.0046848		5	0.402469	0.131423	0.310562	0.0471612	0.00117232	-0.000247176		5	0.396493	0.109354	0.275737	0.0297013	0.00227591	0.00220654		5	0.0111274	0.0192351	0.0303217	0.0159257	0.00441867	0.00246608
6	0.405635	0.124933	0.291663	0.0216183	0.0079127	0.00215456		6	0.414844	0.117129	0.278029	0.0322087	-0.00149062	0.00198607		6	0.424692	0.155704	0.343329	0.0657629	0.00554945	-0.00089972		6	0.415057	0.132588	0.30434	0.0398633	0.00399051	0.0010803		6	0.00953045	0.0203953	0.0344462	0.0230463	0.00489166	0.00171682
7	0.424559	0.149352	0.320862	0.0271265	0.0112558	0.00330724		7	0.434993	0.134511	0.3058	0.0412604	-0.00443921	0.00166524		7	0.42775	0.18283	0.367655	0.0781231	0.00179238	-0.00266244		7	0.429101	0.155564	0.331439	0.0488367	0.00286965	0.000770012		7	0.00534618	0.0247512	0.0322554	0.0263289	0.00790276	0.00308388
8	0.434852	0.16423	0.345373	0.034436	0.00961588	0.00215772		8	0.454119	0.162942	0.333418	0.0502268	-0.00070556	0.00478418		8	0.444041	0.2062	0.382374	0.0899226	0.000891245	0.000439267		8	0.444338	0.177791	0.353722	0.0581951	0.00326719	0.00246039		8	0.00963697	0.0246114	0.0255236	0.0285886	0.0055558	0.00218821
9	0.433016	0.182761	0.367282	0.0396415	0.00887977	0.00407183		9	0.460465	0.178318	0.353501	0.0584564	-0.0015545	0.00313882		9	0.453152	0.224203	0.399651	0.114492	0.00284182	-0.000812149		9	0.448878	0.195094	0.373478	0.0708633	0.00338903	0.00213283		9	0.0142149	0.0253067	0.0236906	0.038937	0.00523861	0.00259274
10	0.440478	0.206386	0.385199	0.0493302	0.0105977	0.00261858		10	0.469135	0.19644	0.3746	0.0649612	-0.00161555	0.00307494		10	0.454883	0.2452	0.406257	0.130971	-1.27119e-05	-0.0015226		10	0.454832	0.216008	0.388685	0.081754	0.00298982	0.0013903		10	0.0143287	0.025765	0.0161138	0.0433335	0.0066372	0.00253295
11	0.446999	0.218764	0.399885	0.0528831	0.0141865	0.00465608		11	0.46883	0.211129	0.384753	0.0724072	-0.00377624	0.00158716		11	0.464881	0.26105	0.416847	0.146177	0.00282345	-0.00551132		11	0.460237	0.230314	0.400495	0.0904891	0.00441125	0.000243973		11	0.0116327	0.0268905	0.0160558	0.0492052	0.00908604	0.00521508
12	0.45304	0.234296	0.411005	0.0633986	0.013694	0.00334837		12	0.483783	0.229181	0.403644	0.0850761	-0.000506811	0.00196762		12	0.468761	0.272467	0.422658	0.163515	0.00236159	-0.00139125		12	0.468528	0.245315	0.412436	0.103996	0.00518294	0.00130825		12	0.0153727	0.0236533	0.00958732	0.0526715	0.00750906	0.00243764
13	0.452728	0.24583	0.413439	0.068524	0.0124749	0.00433442		13	0.485495	0.24729	0.420116	0.0935996	-0.00106331	0.00308771		13	0.470313	0.282307	0.433835	0.177717	0.000610171	-0.00245763		13	0.469512	0.258476	0.422463	0.11328	0.00400726	0.00165483		13	0.0163982	0.0206516	0.0103985	0.0571948	0.00738079	0.00361564
14	0.45902	0.263661	0.42023	0.0789361	0.0122302	0.00361518		14	0.490194	0.261996	0.431861	0.102374	-0.00225155	0.0012365		14	0.480925	0.305942	0.436795	0.194806	0.00357346	-0.00497883		14	0.476713	0.277199	0.429629	0.125372	0.00451739	-4.23799e-05		14	0.0160083	0.0249055	0.00850499	0.0612626	0.00728689	0.00443744
15	0.459941	0.269133	0.434471	0.0854103	0.0123821	0.00488809		15	0.49881	0.273666	0.437371	0.112912	-0.00078222	0.00252696		15	0.480679	0.314865	0.440911	0.20594	0.00427826	-0.0028404		15	0.47981	0.285888	0.437584	0.134754	0.00529272	0.00152488		15	0.0194487	0.0251971	0.00322543	0.0631636	0.00664054	0.00396049
16	0.46501	0.278121	0.432665	0.0929359	0.0125814	0.00473306		16	0.506768	0.286831	0.4456	0.122163	-0.00182565	0.0031232		16	0.489352	0.327072	0.449188	0.215379	0.00345481	-0.00144351		16	0.487043	0.297341	0.442484	0.143493	0.00473686	0.00213759		16	0.0209746	0.0261129	0.00869083	0.0639477	0.0072886	0.00320407
17	0.465623	0.284859	0.434993	0.10156	0.0106431	0.0034591		17	0.506998	0.29804	0.448435	0.132123	-0.00459821	0.0044818		17	0.496387	0.33209	0.451863	0.227057	0.00536442	-0.00406781		17	0.489669	0.304996	0.445097	0.15358	0.00380309	0.00129103		17	0.0214902	0.0243717	0.00891681	0.0654421	0.00773966	0.00466898
18	0.465186	0.295771	0.436675	0.111531	0.0116217	0.00514752		18	0.512231	0.308643	0.459301	0.146005	-0.00243468	0.00440656		18	0.497153	0.338548	0.457337	0.240674	0.00249718	-0.00319492		18	0.491523	0.314321	0.451104	0.16607	0.00389475	0.00211972		18	0.0240224	0.021946	0.012535	0.066869	0.00713166	0.0046175
19	0.469972	0.304801	0.438492	0.118829	0.0124707	0.00646156		19	0.515784	0.317279	0.469162	0.153457	-0.00352922	0.00217489		19	0.506709	0.348738	0.457071	0.247114	0.00424719	-0.00472176		19	0.497488	0.323606	0.454908	0.173133	0.00439622	0.00130489		19	0.0242583	0.0226418	0.015449	0.0663673	0.008001	0.00564219
20	0.480273	0.314373	0.44147	0.127033	0.0149733	0.00669463		20	0.522197	0.324616	0.473228	0.165971	-0.00188102	0.00183559		20	0.50676	0.34967	0.462956	0.25816	0.00756499	-0.00230933		20	0.503077	0.329553	0.459218	0.183722	0.00688575	0.00207363		20	0.0212031	0.0181592	0.0162055	0.0673415	0.00844765	0.0045067
21	0.483556	0.319877	0.443128	0.134205	0.015064	0.00504312		21	0.532053	0.330205	0.473364	0.172821	-0.00476572	-0.000722596		21	0.51365	0.36481	0.469921	0.267001	0.00434323	-0.00272317		21	0.509753	0.338298	0.462138	0.191342	0.00488049	0.00053245		21	0.0244823	0.0235343	0.0165527	0.0683079	0.00992576	0.00403239
22	0.479367	0.324123	0.451284	0.139973	0.0152011	0.00534895		22	0.530949	0.341451	0.479555	0.18413	-0.00163684	0.00400764		22	0.518657	0.358295	0.46471	0.276505	0.00540397	-0.00353532		22	0.509658	0.34129	0.465183	0.200203	0.00632273	0.00194042		22	0.0269426	0.0170864	0.0141414	0.0696705	0.00845647	0.00478932
23	0.482742	0.328815	0.451695	0.14589	0.0137499	0.00476259		23	0.527594	0.341755	0.474595	0.189796	-0.00647639	0.000499713		23	0.523455	0.369209	0.4742	0.284769	0.00305227	-0.00704522		23	0.511264	0.346593	0.46683	0.206818	0.00344194	-0.000594304		23	0.0247871	0.0206268	0.0131086	0.0709873	0.0101188	0.00597944
24	0.493222	0.331742	0.452435	0.153884	0.0158254	0.00535001		24	0.538912	0.350425	0.482975	0.200982	-0.00592557	-0.000337874		24	0.524737	0.37236	0.467657	0.288457	0.0061455	-0.00503391		24	0.518957	0.351509	0.467689	0.214441	0.00534844	-7.25967e-06		24	0.0233871	0.0203308	0.0152702	0.0682887	0.0108974	0.00519985
25	0.494218	0.335014	0.463703	0.160585	0.0165794	0.00353503		25	0.535946	0.353477	0.482014	0.204862	-0.00734237	-0.000653033		25	0.516555	0.375901	0.48261	0.29498	0.00199294	-0.00621329		25	0.515573	0.354797	0.476109	0.220142	0.00374334	-0.00111043		25	0.0208812	0.0204753	0.010748	0.0684881	0.0120566	0.00489023
26	0.488778	0.3367	0.466389	0.166703	0.0165615	0.00420576		26	0.544545	0.36407	0.485929	0.218787	-0.00942923	0.000133446		26	0.521466	0.375878	0.476254	0.294809	0.00454804	-0.00671188		26	0.518263	0.358883	0.476191	0.226767	0.00389344	-0.000790892		26	0.0280207	0.0200975	0.00977017	0.0644243	0.0130077	0.0055172
27	0.485661	0.342974	0.481269	0.171535	0.010642	0.00477419		27	0.549302	0.36126	0.475105	0.219347	-0.0105181	-0.00239635		27	0.514749	0.380487	0.494397	0.30444	0.00620764	-0.00851697		27	0.516571	0.361574	0.48359	0.231774	0.00211052	-0.00204638		27	0.0318595	0.0187584	0.00985344	0.0673186	0.0111592	0.00665249
28	0.501128	0.342579	0.492071	0.178219	0.0150808	0.0018793		28	0.543371	0.377665	0.487171	0.227904	-0.00776968	-0.00246307		28	0.542809	0.390713	0.499548	0.308514	0.00471188	-0.00968364		28	0.529103	0.370319	0.49293	0.238212	0.00400768	-0.00342247		28	0.0242285	0.0248938	0.00623286	0.0657562	0.0114415	0.00584087
29	0.505064	0.338082	0.500126	0.179348	0.0145472	0.00304781		29	0.547161	0.369256	0.497687	0.234236	-0.0128463	-0.00112435		29	0.51585	0.389956	0.498951	0.312309	0.00409747	-0.00897601		29	0.522692	0.365765	0.498921	0.241964	0.00193279	-0.00235085		29	0.0218667	0.0261127	0.00121993	0.0668164	0.0138245	0.00610502
30	0.492501	0.347297	0.509651	0.190128	0.0142298	0.00756573		30	0.539911	0.377084	0.498869	0.245349	-0.0108162	-0.000556498		30	0.525405	0.394964	0.506242	0.312824	0.00589832	-0.0098263		30	0.519273	0.373115	0.504921	0.249434	0.00310396	-0.000939022		30	0.0242926	0.0240803	0.005511	0.0614499	0.0127547	0.00870232
31	0.478627	0.347486	0.511681	0.187657	0.0102961	0.00302566		31	0.557206	0.373781	0.504823	0.244785	-0.011005	0.000220044		31	0.521929	0.410921	0.524623	0.316701	0.00451272	-0.0106978		31	0.519254	0.377396	0.513709	0.249715	0.00126793	-0.00248402		31	0.039358	0.0318716	0.0100544	0.0646631	0.011015	0.00725032
32	0.506525	0.35347	0.530042	0.195069	0.00950093	0.00247305		32	0.564513	0.372891	0.505976	0.252018	-0.0146123	-0.00462944		32	0.534059	0.40796	0.53717	0.319697	0.004839	-0.0107585		32	0.535033	0.378107	0.524396	0.255595	-9.0802e-05	-0.00430497		32	0.0290062	0.0276173	0.0163453	0.062391	0.0127902	0.00662174
33	0.516312	0.346621	0.534971	0.197384	0.00940285	0.00405601		33	0.562179	0.381793	0.514565	0.260397	-0.015386	-0.0051618		33	0.518154	0.406829	0.514202	0.323661	0.006089	-0.0128334		33	0.532215	0.378414	0.521246	0.260481	3.52722e-05	-0.00464639		33	0.0259661	0.0302458	0.0118878	0.0631383	0.0134576	0.00845648
34	0.502777	0.353668	0.553335	0.20318	0.00878169	0.00335891		34	0.556505	0.373876	0.528814	0.265653	-0.0134922	-0.00283786		34	0.529569	0.409542	0.518284	0.321378	0.00516527	-0.0132571		34	0.529617	0.379029	0.533478	0.263404	0.000151573	-0.00424535		34	0.0268639	0.0282913	0.0179849	0.0591311	0.0119534	0.00839695
35	0.490531	0.360859	0.582241	0.202709	0.0034011	0.00100398		35	0.559973	0.3777	0.546688	0.266171	-0.0152469	-0.00259794		35	0.54454	0.429063	0.556555	0.327118	0.00604945	-0.0142585		35	0.531681	0.389208	0.561828	0.265333	-0.00193212	-0.00528416		35	0.036463	0.0355284	0.0183533	0.062209	0.0116067	0.00797796
36	0.503329	0.357228	0.615039	0.204423	0.0046276	-0.000837356		36	0.562381	0.375118	0.551159	0.26948	-0.0161526	-0.00737644		36	0.542168	0.434058	0.532938	0.320679	0.00218645	-0.0152698		36	0.535959	0.388801	0.566379	0.264861	-0.00311286	-0.00782787		36	0.0300117	0.040201	0.0431146	0.0582652	0.0113585	0.00722681
37	0.50643	0.362831	0.625007	0.20694	0.00106937	-0.0014079		37	0.544274	0.368535	0.559472	0.26724	-0.0189919	-0.00873645		37	0.558398	0.44372	0.52855	0.323149	0.00227543	-0.0158588		37	0.536367	0.391696	0.57101	0.265776	-0.00521571	-0.00866772		37	0.026871	0.0451448	0.0492529	0.0581186	0.0119458	0.0072257
38	0.51917	0.36788	0.648694	0.208658	0.0010641	-0.00047879		38	0.551888	0.371629	0.600578	0.274815	-0.0190402	-0.00762629		38	0.54337	0.450076	0.557801	0.325303	0.000494352	-0.0184916		38	0.538143	0.396528	0.602358	0.269592	-0.00582725	-0.00886555		38	0.016974	0.0464118	0.0454729	0.0584979	0.0114463	0.00907011
39	0.49856	0.358877	0.693292	0.204873	0.000325873	-0.00250469		39	0.550406	0.372858	0.635309	0.276	-0.0211867	-0.0054003		39	0.531743	0.45589	0.597841	0.321693	0.000340396	-0.0167331		39	0.526903	0.395875	0.642147	0.267522	-0.00684014	-0.0082127		39	0.0262599	0.0524425	0.0480914	0.0588698	0.0124245	0.00751958
40	0.505383	0.367846	0.744827	0.212913	-0.00307523	-0.000143426		40	0.570425	0.374182	0.665636	0.280235	-0.0210319	-0.00847382		40	0.535664	0.469024	0.640554	0.327449	0.0012387	-0.0182515		40	0.537157	0.403684	0.683672	0.273532	-0.00762282	-0.00895624		40	0.0325464	0.0566746	0.0544261	0.0575613	0.0118113	0.00906365

## Sheet: Figure 4E_R&Qb_No 17&18
	Replicate 1								Replicate 2								Replicate 3								Replicate 4								Average								Stdev
sQa	w.t.	3Δ	w.t.	3Δ	w.t.	None		sQa	w.t.	3Δ	w.t.	3Δ	w.t.	None		sQa	w.t.	3Δ	w.t.	3Δ	w.t.	None		sQa	w.t.	3Δ	w.t.	3Δ	w.t.	None		sQa	w.t.	3Δ	w.t.	3Δ	w.t.	None		sQa	w.t.	3Δ	w.t.	3Δ	w.t.	None
Qc	w.t.	w.t.	3Δ	3Δ	None	w.t.		Qc	w.t.	w.t.	3Δ	3Δ	None	w.t.		Qc	w.t.	w.t.	3Δ	3Δ	None	w.t.		Qc	w.t.	w.t.	3Δ	3Δ	None	w.t.		Qc	w.t.	w.t.	3Δ	3Δ	None	w.t.		Qc	w.t.	w.t.	3Δ	3Δ	None	w.t.
0	0	0.0349168	0.016356	0.0193881	0.012194	0.0165581		0	0.00284541	0	0.0164166	0.00550066	0.030131	0.0139115		0	0.0128776	0.00603541	0.0108212	0	0.00247646	0.00118154		0	0.0124174	0	0.000222123	0.0110118	0.00228214	0.00976626		0	0.0070351	0.0102381	0.010954	0.00897515	0.0117709	0.0103543		0	0.00658661	0.0166967	0.00762041	0.0082705	0.0130856	0.00672374
1	-0.00934811	0.0290896	0.014549	0.0188242	0.0117804	0.0183534		1	0.00409105	0.000886003	0.0122042	0.00514929	0.0264644	0.012309		1	0.0107222	0.00386209	0.00935685	-0.000389073	0.00204681	-0.00200623		1	0.00695389	-0.00252456	-0.000967311	0.0075295	0.000366623	0.00788896		1	0.00310475	0.00782828	0.0087857	0.00777849	0.0101645	0.00913628		1	0.00873475	0.0144124	0.00683983	0.00807655	0.0119749	0.00857775
2	-0.00989613	0.0274	0.0131821	0.0175832	0.0105013	0.0147892		2	0.00174858	-0.000613175	0.0123972	0.00451269	0.0276025	0.0150634		2	0.00890213	0.0039325	0.00853574	-0.00133669	-0.000184989	0.00147872		2	0.00446157	-0.00233349	-0.00276221	0.00714974	-0.00130886	0.00621467		2	0.00130404	0.00709647	0.00783821	0.00697725	0.00915249	0.0093865		2	0.00802792	0.0137914	0.00735294	0.00791017	0.0134021	0.00668356
3	-0.00925078	0.022251	0.00951632	0.0153256	0.00917566	0.0141544		3	0.00583687	0.000784037	0.0122153	0.00360326	0.0270155	0.0154203		3	0.00771582	0.00536109	0.00863838	-0.00166132	-0.000689829	-0.000778146		3	0.00355755	-0.00330199	-0.00199911	0.00519959	0.000524259	0.00727633		3	0.00196487	0.00627352	0.00709271	0.00561678	0.0090064	0.00901823		3	0.00766797	0.011224	0.00624939	0.00710539	0.0127844	0.00744693
4	-0.0125336	0.0245383	0.00823196	0.0131991	0.00745119	0.013471		4	0.00432667	-0.000800572	0.0128036	0.00275446	0.024589	0.015616		4	0.0075738	0.00604376	0.00629439	-0.000476197	-0.00101445	0.000554966		4	0.0040842	-0.00152859	-0.00437798	0.00748412	-0.000415585	0.00770266		4	0.000862763	0.00706321	0.005738	0.00574036	0.00765254	0.00933614		4	0.00907152	0.0121391	0.0072752	0.00595075	0.0119317	0.00674068
5	-0.0113402	0.0184434	0.00901379	0.0133123	0.00778868	0.0127685		5	0.00966887	0.000362393	0.0103992	0.00556129	0.0282515	0.0129042		5	0.00817173	0.00588025	0.0118524	-0.00196685	-0.000217213	-0.00152049		5	0.00517093	-0.00484253	-0.00418571	0.00392537	-0.00243261	0.00561757		5	0.00291782	0.00496087	0.00676991	0.00520802	0.00834759	0.00744245		5	0.0096876	0.00999792	0.00739513	0.00629623	0.0139767	0.00687658
6	-0.011957	0.0161296	0.00793256	0.00881384	0.00565478	0.0104304		6	0.0124867	-0.000358259	0.00936573	0.00287572	0.0263417	0.0130668		6	0.00815621	0.00656531	0.00776117	-0.00147275	0.00112664	0.000201697		6	0.00137215	-0.00268936	-0.00328408	0.00558055	0.00101866	0.00348351		6	0.00251451	0.00491182	0.00544385	0.00394934	0.00853545	0.00679561		6	0.0106771	0.00844836	0.00586292	0.00435415	0.0120658	0.00597186
7	-0.0123146	0.0146559	0.00456403	0.00847318	0.00570345	0.00969194		7	0.0155057	-0.00166177	0.0128395	0.00191393	0.0213881	0.0123999		7	0.00805119	0.00393489	0.00585638	-0.000988198	0.000512001	-0.00122451		7	0.000743993	-0.00562593	-0.00256517	0.00480789	-0.00103896	0.0071796		7	0.00299658	0.00282577	0.00517368	0.0035517	0.00664114	0.00701174		7	0.0118538	0.00880816	0.00631115	0.00404524	0.0102454	0.0058901
8	-0.0138635	0.0158122	0.00512686	0.0061753	0.00345952	0.00790823		8	0.0192275	-0.00138205	0.00884763	0.00246786	0.0211607	0.0149394		8	0.00820514	0.00442899	0.00806551	-3.93847e-05	-0.000924944	0.000512001		8	0.00137215	-0.00503838	-0.00347277	0.00471474	-0.000383342	0.00608928		8	0.00373533	0.0034552	0.00464181	0.00332963	0.00582799	0.00736223		8	0.0138479	0.0091138	0.00564187	0.00271473	0.0104065	0.00595141
9	-0.0137249	0.0105172	0.0010241	0.00608219	0.00329554	0.00741099		9	0.0242886	0.00233144	0.0108897	0.00486819	0.0201976	0.0125942		9	0.0108248	0.00453163	0.00748548	-0.000227954	-6.44477e-05	0.00101923		9	-0.00141156	-0.00553397	-0.00513272	0.00472908	-0.000395284	0.00434693		9	0.00499425	0.00296156	0.00356664	0.00386288	0.00575834	0.00634284		9	0.0163065	0.00663634	0.0070976	0.00279411	0.00976949	0.00491748
10	-0.0133969	0.00834834	0.00439581	0.00342672	0.00202281	0.00442649		10	0.0296914	0.00065589	0.0108236	0.00404833	0.0245408	0.0122814		10	0.0129086	0.00485506	0.00644835	-0.00123405	-0.00186421	-0.000434425		10	6.09048e-05	-0.004126	-0.00306315	0.00426572	-0.00152262	0.00608092		10	0.00731602	0.00243332	0.00465114	0.00262668	0.00579419	0.0055886		10	0.0183811	0.00538628	0.00579955	0.00259826	0.0126207	0.00524924
11	-0.0140814	0.00808068	0.00206619	0.0039684	0.00156789	0.00253275		11	0.0306601	0.0020407	0.00923207	0.00381271	0.0215727	0.0108484		11	0.0124468	0.00260297	0.0077922	-0.000712505	-0.0015551	-0.00052871		11	-0.00269295	-0.0057967	-0.00539903	0.0034859	-0.00107001	0.0048891		11	0.00658313	0.00173191	0.00342286	0.00263863	0.00512888	0.00443538		11	0.0193834	0.00571083	0.00664591	0.00224312	0.0110481	0.00481645
12	-0.0134604	0.00379489	0.00148326	0.00201118	0.00130869	0.001369		12	0.0372218	0.00238932	0.0134582	0.00354677	0.0218125	0.01131		12	0.0141296	0.0042249	0.00655815	0.000432038	0.000550192	0.00159329		12	-0.00118943	-0.00421437	-0.0050539	0.00379759	-0.000283028	0.00389552		12	0.00917538	0.00154868	0.00411141	0.00244689	0.00584709	0.00454194		12	0.02184	0.00392118	0.00783705	0.00155816	0.0106634	0.00465426
13	-0.0141068	0.004381	0.000626311	0.000825206	-0.00103786	0.0014621		13	0.0406294	0.00161079	0.00945392	0.00407865	0.0207722	0.0144751		13	0.0167827	0.00283928	0.00647938	0.00022318	-0.00014083	0.000390266		13	-0.00205882	-0.00370683	-0.00370444	0.00258786	-0.00130169	0.00526528		13	0.0103116	0.00128106	0.00321379	0.00192872	0.00457295	0.00539817		13	0.023877	0.00351309	0.00589237	0.0017496	0.0108109	0.00640259
14	-0.0139671	0.00315271	-0.00166734	-0.00257084	-0.00111403	0.000221113		14	0.0444517	0.00285919	0.0105397	0.00353299	0.0215466	0.0122153		14	0.0160952	0.00388715	0.0066214	-0.00138324	-0.000646864	0.00019215		14	-0.00252456	-0.00359816	-0.00316466	0.00346202	-0.00199194	0.00384058		14	0.0110138	0.00157522	0.00308228	0.000760233	0.00444843	0.00411728		14	0.0255033	0.00347591	0.00657576	0.00319783	0.0114124	0.00566394
15	-0.0128965	0.00183027	-0.00366899	-0.00252852	-0.00189374	-0.00353146		15	0.0515797	0.00174445	0.0123655	0.00551031	0.0194866	0.011609		15	0.0182291	0.00177112	0.00645432	-0.00110277	0.00072444	-0.00189285		15	-0.000619795	-0.00367339	-0.00511003	0.00289954	-0.00248396	0.00238126		15	0.0140731	0.00041811	0.00251019	0.00119464	0.00395832	0.00214148		15	0.0280907	0.0027279	0.00834531	0.00368201	0.0104456	0.006786
16	-0.0159254	0.00300142	-0.0031178	-0.00391021	-0.000954277	-0.00204186		16	0.0554048	0.000451958	0.0141471	0.00580105	0.0210877	0.0113651		16	0.0172302	0.00435022	0.00544464	-0.000675507	-0.00110635	0.000942846		16	-0.00256278	-0.00414511	-0.0035074	0.00160144	-0.0012587	0.00342739		16	0.0135367	0.000914624	0.00324164	0.000704192	0.00444209	0.00342337		16	0.031058	0.00374045	0.00836211	0.00408164	0.0110978	0.00574725
17	-0.0118893	0.00120607	-0.0037092	-0.00200694	-0.00612874	-0.00458624		17	0.0576384	0.00118226	0.011197	0.00581069	0.0190594	0.00895649		17	0.019166	0.00219241	0.00388357	-0.000694603	-0.000617027	-0.000151571		17	-0.00201702	-0.00560801	-0.0017543	0.00408062	-0.00164562	0.00357666		17	0.0157245	-0.000256818	0.00240427	0.00179744	0.002667	0.00194883		17	0.0307999	0.00359838	0.00668751	0.00374178	0.0111872	0.00574096
18	-0.0117306	0.00106536	-0.00524747	-0.00556909	-0.00550984	-0.00375575		18	0.063755	0.00246097	0.00992241	0.00527882	0.0186998	0.0123476		18	0.021553	0.000519162	0.00306604	-0.000412943	0.00128299	0.000989391		18	-0.00253889	-0.00454158	-0.00206121	0.00358622	-0.000428722	0.00221884		18	0.0177596	-0.000124023	0.00141994	0.000720751	0.00351105	0.00295001		18	0.0337227	0.00305643	0.00662255	0.00482473	0.0105287	0.00677396
19	-0.0125093	0.000260257	-0.00432704	-0.00546012	-0.00662493	-0.00562727		19	0.0670717	0.00387747	0.009024	0.00613037	0.0186226	0.0120541		19	0.0218084	0.00267816	0.00578478	-0.000595544	-0.00109442	0.000648057		19	-0.00240872	-0.00473624	-0.00436006	0.00145574	-0.00143186	0.00285536		19	0.0184905	0.000519911	0.00153042	0.000382613	0.00236785	0.00248255		19	0.0354443	0.00381339	0.0069104	0.00480564	0.0111282	0.00732319
20	-0.011189	0.00178689	-0.00695607	-0.00740358	-0.0038023	-0.00586002		20	0.0692309	0.00433907	0.00811044	0.00614139	0.0177628	0.0107395		20	0.0233503	0.000844981	0.00439318	-0.00310423	-0.00154316	-0.000636122		20	-0.0040842	-0.00476251	-0.00370444	0.00232155	-0.000648457	0.00259263		20	0.019327	0.000552108	0.000460779	-0.000511218	0.00294222	0.001709		20	0.0364504	0.00383826	0.00698426	0.00595847	0.0099691	0.00695511
21	-0.010642	0.000627369	-0.00753689	-0.0066408	-0.0059034	-0.00710841		21	0.0762679	0.00317886	0.00925687	0.00620064	0.0188183	0.0116379		21	0.0221891	0.00211245	0.00292043	-0.00262803	-0.00110755	-0.000342527		21	-0.0039397	-0.00496672	-0.00604868	0.00262726	-0.00110345	0.00473624		21	0.0209688	0.00023799	-0.000352064	-0.00011023	0.00267597	0.00223081		21	0.0394933	0.00362413	0.00789755	0.00566594	0.0109966	0.00792915
22	-0.00805846	-0.000123781	-0.00864033	-0.00742686	-0.00841605	-0.00807962		22	0.076053	0.00231766	0.00569357	0.00459261	0.0149932	0.0123227		22	0.0252432	-0.000819918	0.00367113	-0.00240008	-0.00183676	0.000295982		22	-0.00379401	-0.00598061	-0.0033414	0.00291507	-0.00183311	0.00127183		22	0.0223609	-0.00115166	-0.000654259	-0.000579814	0.00072681	0.00145274		22	0.0387323	0.0034891	0.00658286	0.00545171	0.0100041	0.00837444
23	-0.00586531	7.72309e-05	-0.0100083	-0.010862	-0.0079516	-0.0090212		23	0.081267	0.002771	0.00536562	0.00540834	0.0163463	0.00824824		23	0.0274201	0.000315078	0.00328564	-0.000403395	-0.000397427	0.00108487		23	-0.00139962	-0.00347635	-0.00435768	0.00104613	-0.00283267	0.00378804		23	0.0253555	-7.82601e-05	-0.00142867	-0.00120274	0.00129114	0.00102499		23	0.0400871	0.00257191	0.00708463	0.00689698	0.0105189	0.00731982
24	-0.00556274	0.000793468	-0.00919894	-0.00938619	-0.00968983	-0.00816108		24	0.0882503	0.00373279	0.00618273	0.00831989	0.015514	0.012433		24	0.0269117	0.000188569	0.00305052	-0.0022867	-0.00030911	-0.00196565		24	-0.000967311	-0.0068273	-0.00619318	0.00164921	-0.00255083	0.00238603		24	0.027158	-0.00052812	-0.00153971	-0.00042595	0.00074106	0.00117307		24	0.0431818	0.00447569	0.00732632	0.00740595	0.0106299	0.00866477
25	-0.0060695	-0.00168427	-0.0106822	-0.0108631	-0.00936927	-0.00883817		25	0.0934658	0.00390503	0.00672977	0.0056357	0.0176016	0.0137034		25	0.0279285	0.000668346	0.000682668	-0.00129492	-0.000490518	-0.00217451		25	-0.00209465	-0.00489268	-0.00467534	0.00202419	-0.00189999	0.00307032		25	0.0283075	-0.000500894	-0.00198627	-0.00112453	0.00146045	0.00144026		25	0.0460138	0.00371786	0.00743735	0.00708246	0.0114443	0.00951762
26	-0.00376844	-0.00489411	-0.0109784	-0.0114809	-0.0106706	-0.00925501		26	0.0975348	0.00353023	0.00508728	0.00556405	0.0147465	0.0099789		26	0.0300457	0.00145843	0.00125434	-0.000717279	-0.000812757	-0.00112903		26	-0.000434693	-0.00270369	-0.00578595	0.00254367	-0.00312286	0.00264518		26	0.0308443	-0.000652285	-0.00260569	-0.00102263	3.50845e-05	0.000560011		26	0.0469917	0.00383623	0.00717167	0.00742905	0.0106728	0.00800523
27	-0.00121136	-0.00263537	-0.0117941	-0.0106113	-0.0110207	-0.00958403		27	0.10212	0.00604494	0.0106568	0.00753861	0.0164992	0.0122001		27	0.0317799	0.000436812	0.00310781	-0.000829465	-0.00198952	-0.00105026		27	-0.00108434	-0.00527483	-0.00293895	0.000531424	-0.00361965	0.00315749		27	0.0329012	-0.000357112	-0.000242102	-0.000842686	-3.26722e-05	0.00118083		27	0.0486869	0.00486453	0.00949966	0.00747352	0.011701	0.00905891
28	-0.00048137	-0.00482957	-0.0114936	-0.0123093	-0.0111562	-0.0104621		28	0.103449	0.00514102	0.00605872	0.0062158	0.0160624	0.0113858		28	0.0346275	-0.00227357	0.00039146	-0.0018654	-0.00214587	-0.00164103		28	-0.000730857	-0.0036304	-0.00615974	0.00138409	-0.00294492	0.000709361		28	0.034216	-0.00139813	-0.0028008	-0.00164371	-4.61311e-05	-2.01073e-06		28	0.0490528	0.00448274	0.00764917	0.00784738	0.0114852	0.00898681
29	0.00286072	-0.00439475	-0.012339	-0.011719	-0.0105743	-0.0107118		29	0.108808	0.00325878	0.00754963	0.00855689	0.0144778	0.0102297		29	0.0333994	-0.000712505	0.00133311	-0.00188092	-0.00271874	-0.00299085		29	-0.000150471	-0.00603793	-0.00682611	0.000761907	-0.00278371	0.00245172		29	0.0362293	-0.0019716	-0.00257058	-0.00107028	-0.000399727	-0.000255316		29	0.0507036	0.00413719	0.00877854	0.00836842	0.0105818	0.00883336
30	0.00170331	-0.00385308	-0.0142158	-0.013216	-0.0114979	-0.0108874		30	0.112236	0.000788171	0.00546621	0.00583963	0.014956	0.00836398		30	0.0345714	-0.00115648	0.00226164	-0.00359952	-0.00147872	-0.000676701		30	6.44874e-05	-0.00435409	-0.00436365	0.000214958	-0.00257591	0.00303688		30	0.0371438	-0.00214387	-0.00271289	-0.00269023	-0.000149138	-4.08193e-05		30	0.0525241	0.00240682	0.00869262	0.00801701	0.0110244	0.00812745
31	0.0043408	-0.0033241	-0.0136371	-0.0122755	-0.0132774	-0.0112535		31	0.117541	0.00451545	0.00640182	0.0056977	0.0193446	0.0100547		31	0.039621	-0.000331786	-0.00172935	-0.00230579	-0.000521549	0.000538257		31	0.00355278	-0.00383461	-0.00508495	0.00113689	-0.0029091	0.00209703		31	0.0412638	-0.000743763	-0.00351239	-0.00193667	0.000659157	0.000359123		31	0.0535609	0.00383147	0.00829564	0.00763233	0.0136321	0.00879222
32	0.0037293	-0.00405409	-0.0161518	-0.0144411	-0.00961154	-0.0124691		32	0.120309	0.00273931	0.00501425	0.00917971	0.0158048	0.0120044		32	0.0389073	0.000121735	0.000165893	-0.00399576	-0.00165893	-0.00347421		32	3.34379e-05	-0.00726439	-0.0043326	0.000328408	-0.00504554	0.00215555		32	0.0407448	-0.00211436	-0.00382607	-0.00223219	-0.000127814	-0.000445822		32	0.0558612	0.00442883	0.00906032	0.00981421	0.0111103	0.0102552
33	0.00705446	-0.00676035	-0.0150653	-0.0126637	-0.0126913	-0.0124733		33	0.122661	0.00455816	0.00700673	0.00688823	0.0143717	0.0127389		33	0.0401605	-0.00128299	0.00160284	-0.00328086	-0.00197162	0.00104429		33	0.00161577	-0.00484133	-0.00546232	0.00134946	-0.00279804	0.000531424		33	0.042873	-0.00208162	-0.00297952	-0.00192673	-0.000772298	0.00046032		33	0.0558529	0.0049743	0.00953858	0.00827756	0.0112093	0.0103019
34	0.00919047	-0.00470262	-0.0168056	-0.0149098	-0.0134921	-0.0127611		34	0.12405	0.00452923	0.00632328	0.0065906	0.0127499	0.0113169		34	0.0404254	-0.00127463	0.00249317	-0.00306723	-0.00157658	-0.00510808		34	0.00166592	-0.00629946	-0.00302971	0.000151665	-0.00286372	0.001445		34	0.043833	-0.00193687	-0.00275473	-0.00280869	-0.00129563	-0.00127682		34	0.0560493	0.00479342	0.0101235	0.00901136	0.0107791	0.0102074
35	0.0090011	-0.00518822	-0.0156821	-0.0152938	-0.0130203	-0.0136847		35	0.128663	0.00507488	0.00805119	0.00707011	0.0132239	0.0127664		35	0.0429222	-0.00247646	-0.000366397	-0.00156942	-0.00165058	0.000173054		35	0.00483894	-0.00549576	-0.00209465	0.0014844	-0.0014844	0.00275385		35	0.0463564	-0.00202139	-0.00252299	-0.00207718	-0.000732837	0.000502167		35	0.0574611	0.00492153	0.0098287	0.00950956	0.0107576	0.0109065
36	0.0109308	-0.00585473	-0.0178382	-0.0154218	-0.0137651	-0.0130541		36	0.132114	0.00311686	0.0104322	0.004656	0.0137806	0.0109779		36	0.0435929	-0.000628962	-0.00114335	-0.0017019	-0.00167445	-0.00232608		36	0.00598419	-0.00607256	-0.00618243	-0.00168623	-0.00296761	0.00232513		36	0.0481554	-0.00235985	-0.00368294	-0.00353849	-0.00115664	-0.000519297		36	0.0584063	0.00443429	0.0117233	0.00846891	0.0113379	0.010011
37	0.0146823	-0.0051385	-0.0186253	-0.0127156	-0.0137312	-0.0128182		37	0.138288	0.00666638	0.00742837	0.00666776	0.0152756	0.0110371		37	0.0458951	-0.0027617	0.000301949	-0.00393011	-0.000768598	-0.00328922		37	0.00489626	-0.00541694	-0.00612391	7.52353e-05	-0.00278251	-0.00150829		37	0.0509405	-0.00166269	-0.00425473	-0.00247568	-0.000501675	-0.00164464		37	0.0607997	0.00567911	0.0110645	0.00810516	0.0119613	0.00980475
38	0.0159043	-0.00662387	-0.0165845	-0.0134403	-0.0144877	-0.0131155		38	0.141103	0.00637564	0.00721617	0.00748073	0.0145398	0.0130158		38	0.0498909	-0.00223061	-0.00218167	-0.00548402	-0.00308991	3.10304e-05		38	0.00700882	-0.00651323	-0.006272	0.00139364	-0.00386686	0.00131124		38	0.0534768	-0.00224802	-0.00445551	-0.00251248	-0.00172615	0.000310656		38	0.0612705	0.00610213	0.00986258	0.00900683	0.0120261	0.010689
39	0.0164057	-0.00790188	-0.016904	-0.0140909	-0.0146929	-0.0126828		39	0.141314	0.00555164	0.00852244	0.00803052	0.0163669	0.0122125		39	0.049929	-0.00358759	-0.000916589	-0.00183318	-0.00467365	-0.00159687		39	0.00681894	-0.00470519	-0.00580625	0.00105449	-0.00394567	0.002558		39	0.0536169	-0.00266075	-0.00377611	-0.00170977	-0.00173632	0.000122714		39	0.0613164	0.00577211	0.0105814	0.00923441	0.013027	0.0103123
40	0.0205117	-0.00908573	-0.0184613	-0.0135471	-0.0147024	-0.0134138		40	0.141285	0.00474418	0.00491367	0.00821379	0.0134664	0.0109269		40	0.0532911	-0.00271635	-0.00305052	-0.00489802	-0.00306604	-0.000661185		40	0.00754622	-0.00685358	-0.0069312	-0.000378565	-0.00538709	0.0021245		40	0.0556585	-0.00347787	-0.00588235	-0.00265249	-0.00242228	-0.000255902		40	0.0602429	0.00608346	0.00972804	0.00907345	0.0117254	0.0100667

## Sheet: Figure 4F_R&Qb_17,18,&AMP-PNP
	Replicate 1								Replicate 2								Replicate 3								Replicate 4								Average								Stdev
sQa	w.t.	3Δ	w.t.	3Δ	w.t.	None		sQa	w.t.	3Δ	w.t.	3Δ	w.t.	None		sQa	w.t.	3Δ	w.t.	3Δ	w.t.	None		sQa	w.t.	3Δ	w.t.	3Δ	w.t.	None		sQa	w.t.	3Δ	w.t.	3Δ	w.t.	None		sQa	w.t.	3Δ	w.t.	3Δ	w.t.	None
Qc	w.t.	w.t.	3Δ	3Δ	None	w.t.		Qc	w.t.	w.t.	3Δ	3Δ	None	w.t.		Qc	w.t.	w.t.	3Δ	3Δ	None	w.t.		Qc	w.t.	w.t.	3Δ	3Δ	None	w.t.		Qc	w.t.	w.t.	3Δ	3Δ	None	w.t.		Qc	w.t.	w.t.	3Δ	3Δ	None	w.t.
0	0.0705634	0.000556108	0.0102864	0	0.0154527	0.0235609		0	0.0605216	0.0170763	0.0294465	0	0.0101034	0.0017791			0.0707755	0.00945471	0.0264605	0.00486938	0.00847964	0.00211842			0.073069	0.0136486	0.0521619	0.0158424	0.0191444	0.0339275		0	0.0687324	0.0101839	0.0295888	0.00517795	0.013295	0.0153465		0	0.00559018	0.00713527	0.0172427	0.00747101	0.00490731	0.0160394
1	0.121126	0.00884933	0.0403087	0.00179418	0.0116955	0.0209815		1	0.0921944	0.0206652	0.038172	-0.00124969	0.00142663	0.000266099			0.100606	0.0196816	0.0533937	0.00609866	0.0020492	0.00376183			0.101692	0.0217287	0.075824	0.0165147	0.0185031	0.0319738		1	0.103905	0.0177312	0.0519246	0.00578947	0.0084186	0.0142458		1	0.0122405	0.00597996	0.0172955	0.00775971	0.0082035	0.0148884
2	0.163087	0.0183333	0.0667728	6.99169e-05	0.0127055	0.0189851		2	0.136059	0.0307394	0.0557429	0.000369195	-0.00032322	0.00045			0.129428	0.0318467	0.0776022	0.00477152	0.0013713	0.0030183			0.125461	0.0336541	0.0981904	0.0149312	0.0177161	0.0298135		2	0.138509	0.0286433	0.0745771	0.00503546	0.00786743	0.0130667		2	0.0169587	0.00697757	0.0180958	0.00693845	0.00875005	0.013852
3	0.192942	0.0284314	0.0946976	-0.00234813	0.0102348	0.0193293		3	0.167124	0.0427654	0.0751361	-8.49846e-05	0.000813623	0.00133328			0.146173	0.0445333	0.0985978	0.00515701	0.00412346	0.00591367			0.145221	0.0447256	0.119304	0.0190286	0.0162222	0.0281559		3	0.162865	0.0401139	0.0969339	0.00543811	0.0078485	0.0136831		3	0.022455	0.00783814	0.0181047	0.00959009	0.00681121	0.0123048
4	0.21897	0.0387286	0.113487	-0.00371097	0.00827601	0.0141781		4	0.190119	0.0542327	0.0886654	0.00132632	0.00026192	-0.000298143			0.165672	0.0578227	0.115919	0.0110361	0.00269964	0.00410556			0.165472	0.0534433	0.135584	0.0188912	0.0160789	0.0285178		4	0.185058	0.0510568	0.113414	0.00688566	0.00682911	0.0116258		4	0.0253972	0.00843691	0.0192376	0.0100756	0.00701978	0.0127878
5	0.239491	0.0523957	0.136247	-0.00291392	0.00609138	0.00980558		5	0.219062	0.0668885	0.106688	0.00426038	0.00277802	0.00190449			0.1833	0.0648415	0.130571	0.0130745	0.00412346	0.00397427			0.177389	0.0626065	0.150855	0.0198669	0.0160096	0.028255		5	0.204811	0.0616831	0.13109	0.00857197	0.00725061	0.0109848		5	0.029555	0.00643375	0.0183756	0.00997269	0.00599574	0.0119896
6	0.261681	0.0607169	0.152258	-0.00402184	0.00283002	0.0114223		6	0.232399	0.0782499	0.123132	0.0059935	-0.00100728	0.000307895			0.196654	0.0772035	0.140812	0.016754	0.00149781	0.00367829			0.189365	0.0706686	0.162566	0.0193164	0.0147151	0.0285894		6	0.220025	0.0717098	0.144692	0.00951051	0.00450891	0.0109995		6	0.033539	0.00805982	0.0168978	0.0107101	0.00698759	0.0126161
7	0.280758	0.0687703	0.166557	-0.00438971	0.00286982	0.00778874		7	0.250645	0.089029	0.140169	0.00546131	0.00157709	0.000502942			0.211454	0.0876071	0.156808	0.018666	0.0032379	0.00541957			0.198768	0.0775736	0.177576	0.0239941	0.0145216	0.024959		7	0.235406	0.080745	0.160277	0.0109329	0.0055516	0.00966757		7	0.0374392	0.00947216	0.0158645	0.0128467	0.00602226	0.0106363
8	0.295374	0.0791664	0.184207	-0.00556539	0.00141555	0.0061387		8	0.2689	0.100106	0.151567	0.00700357	-0.00105465	-0.000424923			0.221164	0.0942965	0.166868	0.0232286	0.00089272	0.00478345			0.215863	0.086136	0.185788	0.0215603	0.0113796	0.0250629		8	0.250325	0.0899263	0.172108	0.0115568	0.00315831	0.00889003		8	0.0383511	0.00918101	0.016155	0.0135426	0.00558299	0.011147
9	0.31354	0.0863377	0.1996	-0.00471132	0.000279668	0.0038422		9	0.282602	0.108385	0.168129	0.00588902	-0.0011661	0.00131796			0.230298	0.103082	0.173799	0.0279512	0.00354104	0.00410556			0.224718	0.0923137	0.198044	0.0253316	0.012999	0.0242055		9	0.262789	0.0975294	0.184893	0.0136151	0.0039134	0.00836779		9	0.0427131	0.0100187	0.0162621	0.0156881	0.00636898	0.010633
10	0.324626	0.0938909	0.212114	-0.00427891	-0.00148977	0.000221583		10	0.298008	0.118838	0.177917	0.00971054	0.00153948	0.00316951			0.241871	0.10735	0.181573	0.0308203	0.00267816	0.00607002			0.234156	0.0996366	0.208731	0.0279732	0.0120173	0.0217884		10	0.274665	0.104929	0.195084	0.0160563	0.0036863	0.00781237		10	0.043808	0.0107883	0.017828	0.01647	0.0058259	0.0096184
11	0.338636	0.101688	0.219956	-0.00421438	-0.00257402	0.00164896		11	0.307431	0.129401	0.192884	0.0127937	0.00246455	-0.00116889			0.245991	0.117473	0.193061	0.0345451	0.00382509	0.00430606			0.245347	0.107955	0.21419	0.0284413	0.0116149	0.0205667		11	0.284351	0.114129	0.205023	0.0178914	0.00383263	0.00633821		11	0.0464482	0.0120733	0.0141123	0.0173522	0.00587312	0.00974551
12	0.348457	0.107401	0.227795	-0.00463926	-0.00512545	-5.16309e-05		12	0.323396	0.143433	0.20683	0.0137146	-9.61301e-05	0.0027014			0.257215	0.121242	0.200763	0.0386149	0.00158852	0.0069687			0.249628	0.112259	0.219996	0.0292116	0.0109318	0.0208509		12	0.294674	0.121084	0.213846	0.0192255	0.00182469	0.00761735		12	0.0488188	0.0159646	0.0122852	0.0189347	0.00670794	0.0092831
13	0.351127	0.112553	0.235879	-0.00482212	-0.00390889	-0.00174254		13	0.33049	0.145952	0.217042	0.0132534	0.000206192	0.00110062			0.263998	0.125051	0.210654	0.0433017	0.00551147	0.00608911			0.258507	0.121179	0.229538	0.0329268	0.00978775	0.021214		13	0.301031	0.126184	0.223279	0.0211649	0.00289913	0.00666529		13	0.0467516	0.0141763	0.0114923	0.0213408	0.00599663	0.010225
14	0.365636	0.117724	0.248703	-0.00492323	-0.0040498	-0.00433808		14	0.345462	0.158748	0.224961	0.0128369	0.000884676	0.00194211			0.267787	0.132436	0.213534	0.0444749	0.00320448	0.00293237			0.264678	0.123726	0.237358	0.0367793	0.0115838	0.0212307		14	0.310891	0.133159	0.231139	0.022292	0.0029058	0.00544177		14	0.0522361	0.0180975	0.0152235	0.0225982	0.00652848	0.0110073
15	0.366446	0.12643	0.256338	-0.00649259	-0.00464141	-0.00642375		15	0.352042	0.167902	0.23536	0.0156302	-0.000103096	0.00169691			0.274014	0.13882	0.219018	0.0497751	0.00224373	0.00441228			0.270299	0.127673	0.242782	0.0364891	0.0103872	0.0201881		15	0.3157	0.140206	0.238375	0.0238505	0.00197162	0.00496839		15	0.0506458	0.0192857	0.0155549	0.0246313	0.00629639	0.011142
16	0.37087	0.129792	0.26177	-0.00560088	-0.00786619	-0.00761987		16	0.360198	0.176257	0.249824	0.0226491	0.00305945	0.00177771			0.277363	0.142372	0.232589	0.0538962	0.0026889	0.0039874			0.271604	0.134029	0.245465	0.0385479	0.0102834	0.0180959		16	0.320009	0.145612	0.247412	0.0273731	0.00204138	0.00406028		16	0.0528009	0.0210875	0.0120481	0.0254162	0.00747319	0.0106245
17	0.37465	0.136713	0.274356	-0.00709388	-0.00702611	-0.0103671		17	0.365924	0.180715	0.25151	0.0193862	0.000890249	-0.000755109			0.277474	0.145859	0.232026	0.0560086	0.000432038	0.00417239			0.273413	0.14135	0.250016	0.0414785	0.00892673	0.0188029		17	0.322865	0.15116	0.251977	0.0274449	0.000805726	0.00296327		17	0.0548989	0.0200543	0.0173487	0.0275118	0.00651754	0.0121639
18	0.38025	0.143049	0.278444	-0.0053438	-0.0111286	-0.00893968		18	0.370084	0.186846	0.266403	0.0234767	-9.61301e-05	-0.00112152			0.275266	0.147246	0.238045	0.0584015	0.0014632	0.00265787			0.279285	0.141762	0.253938	0.0435135	0.00915721	0.0184482		18	0.326221	0.154726	0.259207	0.030012	-0.000151085	0.00276121		18	0.0566937	0.0215412	0.0172958	0.0275741	0.00836181	0.0115192
19	0.387658	0.147446	0.286798	-0.00636244	-0.00945492	-0.00874499		19	0.372301	0.195529	0.269095	0.0241551	-0.00107972	0.00350945			0.282076	0.154512	0.239189	0.0596654	0.00225328	0.00667153			0.281557	0.146353	0.259577	0.0462351	0.0102559	0.0178164		19	0.330898	0.16096	0.263665	0.0309233	0.000493631	0.0048131		19	0.0570207	0.0233278	0.019836	0.0288478	0.00816184	0.0109249
20	0.390898	0.153419	0.290548	-0.00637427	-0.00933552	-0.00794041		20	0.376069	0.200409	0.275098	0.0272522	0.000122601	-0.000420743			0.287344	0.153838	0.24461	0.0637316	0.0032188	0.0042619			0.284964	0.152054	0.260751	0.048024	0.00922528	0.0160526		20	0.334819	0.16493	0.267752	0.0331584	0.000807791	0.00298833		20	0.056527	0.0236649	0.0196484	0.0302953	0.00774647	0.0100558
21	0.390407	0.156349	0.296609	-0.00470917	-0.012727	-0.00791782		21	0.383707	0.20452	0.285689	0.0300943	2.64706e-05	0.00291177			0.281874	0.156448	0.248239	0.0662797	0.00261371	0.00686368			0.285324	0.157453	0.264951	0.0513224	0.00715094	0.0183276		21	0.335328	0.168693	0.273872	0.0357468	-0.000733978	0.0050463		21	0.0598107	0.0238903	0.0215502	0.0307869	0.00852038	0.010837
22	0.396916	0.160425	0.301853	-0.00376261	-0.0101724	-0.00774142		22	0.378896	0.209334	0.290193	0.0323736	-0.000652013	0.000891642			0.286098	0.159015	0.248459	0.0691774	0.00100849	0.00163864			0.286516	0.158871	0.268552	0.0536105	0.00876073	0.0172098		22	0.337107	0.171911	0.277264	0.0378497	-0.000263792	0.00299966		22	0.0591181	0.0249583	0.0236461	0.0315774	0.00777585	0.0103858
23	0.402786	0.165434	0.306267	-0.0037981	-0.0108791	-0.00973136		23	0.383623	0.218293	0.298664	0.0314917	0.00160496	-0.000890249			0.285127	0.160431	0.249074	0.0747999	0.000961941	0.00438602			0.289453	0.160334	0.270422	0.0534517	0.0079009	0.016264		23	0.340247	0.176123	0.281107	0.0389863	-0.000102819	0.00250709		23	0.0616735	0.0282144	0.0263413	0.0335586	0.00783661	0.0108644
24	0.399067	0.170399	0.307374	-0.00161669	-0.0131874	-0.0117278		24	0.393079	0.224188	0.303494	0.0371438	0.000986379	-0.000143499			0.285954	0.164638	0.250358	0.0780079	0.00137608	0.00397547			0.288998	0.164912	0.272462	0.0555798	0.0100971	0.0169411		24	0.341775	0.181034	0.283422	0.0422787	-0.000181974	0.00226132		24	0.0627585	0.0288913	0.0270183	0.033698	0.0096366	0.0118309
25	0.406033	0.172818	0.314158	-0.00258262	-0.0128238	-0.0106833		25	0.389473	0.230066	0.308592	0.0375339	0.000699382	0.000441641			0.286952	0.164478	0.255278	0.0774303	0.00324745	0.00321403			0.29162	0.164965	0.272336	0.0577114	0.0091381	0.0156704		25	0.34352	0.183082	0.287591	0.0425233	6.52736e-05	0.0021607		25	0.0630162	0.0315552	0.0284233	0.0341985	0.0092911	0.0108251
26	0.403525	0.180841	0.31578	-0.00146395	-0.0138253	-0.0124699		26	0.388336	0.231852	0.312388	0.0405014	0.00101842	0.00159381			0.284036	0.165339	0.256777	0.0797015	0.00230102	0.00275215			0.29002	0.169985	0.279577	0.0611615	0.00756652	0.0156752		26	0.341479	0.187004	0.291131	0.0449751	-0.000734825	0.00188781		26	0.0632271	0.0305959	0.0281254	0.0348546	0.00917537	0.0115047
27	0.408993	0.182108	0.321061	0.000454998	-0.0150106	-0.0128109		27	0.394324	0.23839	0.322618	0.0437671	0.00201734	0.00135279			0.284877	0.166431	0.259037	0.0811456	0.00193462	0.00318061			0.29133	0.175618	0.279584	0.0620381	0.0101233	0.0160454		27	0.344881	0.190637	0.295575	0.0468514	-0.000233833	0.00194197		27	0.065887	0.0324787	0.0314728	0.0344909	0.0105735	0.0118101
28	0.415437	0.183976	0.323437	0.000944416	-0.0151332	-0.0141264		28	0.393114	0.245296	0.327334	0.0445905	0.00202013	0.00432307			0.284017	0.165745	0.259901	0.083369	-0.000847368	0.00405304			0.292996	0.175233	0.280525	0.0664543	0.00737784	0.0153862		28	0.346391	0.192563	0.297799	0.0488395	-0.00164566	0.00240897		28	0.0675569	0.0359355	0.0329863	0.0356584	0.0096162	0.0122229
29	0.417715	0.191487	0.329771	0.00382284	-0.0151107	-0.0114674		29	0.391737	0.25374	0.32931	0.0470369	-0.000220124	0.00192678			0.285083	0.167227	0.258334	0.0856832	0.00190956	0.00247288			0.290458	0.17477	0.28287	0.068654	0.0089733	0.0143902		29	0.346248	0.196806	0.300071	0.0512992	-0.00111198	0.00183061		29	0.0683871	0.0392864	0.0354724	0.0353818	0.0101259	0.0105673
30	0.428625	0.195013	0.333969	0.000272138	-0.0155624	-0.0112469		30	0.394705	0.251463	0.330895	0.0475802	-0.00234892	0.000390093			0.289418	0.168964	0.257082	0.0869328	0.00162432	0.00204204			0.292352	0.179937	0.284822	0.0690397	0.00763937	0.0139854		30	0.351275	0.198844	0.301692	0.0509562	-0.00216191	0.00129265		30	0.0711041	0.0366683	0.0372797	0.0374237	0.00983208	0.0103235
31	0.435284	0.199263	0.331819	0.00244386	-0.01486	-0.0128238		31	0.401558	0.259015	0.342275	0.0530109	0.00155898	0.00138204			0.287071	0.170439	0.257204	0.0883781	0.000194537	0.0023046			0.294863	0.180681	0.285163	0.0704453	0.00721303	0.0150793		31	0.354694	0.202349	0.304115	0.0535695	-0.00147337	0.00148553		31	0.0749303	0.0396162	0.0399314	0.0370161	0.0094275	0.0114051
32	0.441804	0.199833	0.337138	0.00366042	-0.0151257	-0.0100831		32	0.407419	0.261737	0.347686	0.0513419	0.00357353	0.00094319			0.291752	0.16801	0.259402	0.0914787	0.00111471	0.00192866			0.289144	0.183106	0.28929	0.0741163	0.00837858	0.0168611		32	0.35753	0.203172	0.308379	0.0551493	-0.000514723	0.00241245		32	0.0787283	0.0411502	0.0413734	0.0380577	0.0101971	0.0110649
33	0.436219	0.206663	0.343238	0.00340979	-0.0165746	-0.0121537		33	0.397424	0.268178	0.349238	0.0519158	-0.00223886	0.00128591			0.2904	0.169349	0.255857	0.0892254	0.000766211	0.00289298			0.290775	0.186117	0.288644	0.0760987	0.00585283	0.0129727		33	0.353705	0.207577	0.309244	0.0551624	-0.00304861	0.00124948		33	0.0745826	0.0431865	0.0448316	0.0378043	0.0096159	0.0103244
34	0.488709	0.208657	0.343007	0.00247506	-0.0140684	-0.01311		34	0.400787	0.273124	0.347991	0.0551996	-0.00175263	0.000785759			0.293754	0.170747	0.259343	0.0907256	-0.000158732	0.00277364			0.292714	0.187195	0.290675	0.0793159	0.00529752	0.0141084		34	0.368991	0.209931	0.310254	0.056929	-0.00267055	0.00113946		34	0.0945557	0.0448972	0.0427087	0.0392072	0.00817622	0.0111659
35	0.478875	0.21147	0.343685	0.00561809	-0.0151677	-0.0111889		35	0.408286	0.277948	0.35747	0.0587843	0.0013709	0.000536378			0.293125	0.169897	0.255422	0.0910896	0.000149184	0.00146559			0.2955	0.187909	0.291393	0.0770063	0.00647859	0.0149933		35	0.368946	0.211806	0.311993	0.0581246	-0.00179225	0.00145161		35	0.0908755	0.0472664	0.0472483	0.0374192	0.00932887	0.0107082
36	0.477652	0.215469	0.348741	0.00686261	-0.0136564	-0.0120225		36	0.413159	0.28088	0.360381	0.0610914	0.00110062	-0.000838701			0.296468	0.169071	0.256405	0.0936568	-0.0015921	0.00350524			0.29269	0.189648	0.297187	0.0828233	0.00601166	0.014432		36	0.369992	0.213767	0.315678	0.0611085	-0.00203405	0.00126902		36	0.0909861	0.048602	0.0481204	0.0386158	0.00836328	0.0109449
37	0.498786	0.213703	0.349986	0.00914943	-0.0164122	-0.0137414		37	0.413389	0.28694	0.3604	0.063588	0.00271672	0.00323359			0.296634	0.168047	0.254289	0.0943574	0.000548999	0.00103355			0.293686	0.190251	0.296567	0.0840665	0.00663623	0.0147151		37	0.375624	0.214735	0.31531	0.0627903	-0.00162756	0.00131021		37	0.0992444	0.0516199	0.049364	0.0379787	0.0101733	0.0116907
38	0.50133	0.227756	0.34771	0.00738753	-0.0159292	-0.0135144		38	0.428898	0.289725	0.371813	0.0649561	0.000915326	0.00286022			0.295694	0.169631	0.255473	0.0914441	-0.000723246	0.000365204			0.292789	0.19647	0.29648	0.083713	0.00581222	0.0141813		38	0.379678	0.220896	0.317869	0.0618752	-0.00248123	0.00097307		38	0.102996	0.0516695	0.0521256	0.0379895	0.0093854	0.0113765
39	0.553823	0.225815	0.354539	0.011063	-0.0165757	-0.0130949		39	0.433162	0.291786	0.370816	0.0655886	0.0024144	0.000455573			0.298329	0.169719	0.25646	0.09227	-0.000313884	-0.000612253			0.300398	0.193531	0.29955	0.0858482	0.0057752	0.0140236		39	0.396428	0.220213	0.320341	0.0636925	-0.00217499	0.00019301		39	0.12243	0.0529639	0.0523776	0.0368827	0.0099182	0.0110841
40	0.54388	0.224325	0.355346	0.0119891	-0.0143642	-0.0151505		40	0.415466	0.295436	0.372318	0.0657293	-0.00148932	0.00016161			0.299108	0.168516	0.255552	0.0916207	-0.00253494	0.000347301			0.307507	0.196961	0.298366	0.0849753	0.0065395	0.0147879		40	0.39149	0.221309	0.320395	0.0635786	-0.00296223	3.65924e-05		40	0.114579	0.0544174	0.0535643	0.036103	0.00861469	0.0122251

## Sheet: Figure 4G_R&Qb_17,18,&ATPgammaS
	Replicate 1								Replicate 2								Replicate 3								Replicate 4								Average								Stdev
sQa	w.t.	3Δ	w.t.	3Δ	w.t.	None		sQa	w.t.	3Δ	w.t.	3Δ	w.t.	None		sQa	w.t.	3Δ	w.t.	3Δ	w.t.	None		sQa	w.t.	3Δ	w.t.	3Δ	w.t.	None		sQa	w.t.	3Δ	w.t.	3Δ	w.t.	None		sQa	w.t.	3Δ	w.t.	3Δ	w.t.	None
Qc	w.t.	w.t.	3Δ	3Δ	None	w.t.		Qc	w.t.	w.t.	3Δ	3Δ	None	w.t.		Qc	w.t.	w.t.	3Δ	3Δ	None	w.t.		Qc	w.t.	w.t.	3Δ	3Δ	None	w.t.		Qc	w.t.	w.t.	3Δ	3Δ	None	w.t.		Qc	w.t.	w.t.	3Δ	3Δ	None	w.t.
0	0.0867228	0.0190709	0.0326986	0.0342445	0.00709764	0		0	0.0580835	0	0.0789697	0.0686117	0.0238088	0.0116532		0	0.0628381	0.0173699	0.0430598	0.0138871	0.000518649	0		0	0.0280334	0	0.0177932	0.0205841	0.00555666	0.00212737		0	0.0589195	0.00911022	0.0431303	0.0343318	0.00924544	0.00344515		0	0.0241041	0.0105425	0.0260464	0.0243728	0.0101072	0.00556319
1	0.131518	0.00824547	0.0591189	-0.00233253	0.00898051	-0.0020282		1	0.102689	0.0123797	0.109008	0.0314766	0.0195853	0.0126648		1	0.102175	0.0152257	0.0903793	0.0134296	-0.00267008	0.00194493		1	0.0664822	0.00758755	0.0637628	0.0202577	0.00367585	0.00285159		1	0.100716	0.0108596	0.0805674	0.0157078	0.00739291	0.00385828		1	0.0266254	0.00360156	0.023435	0.0141421	0.00942083	0.00624179
2	0.1863	0.0177578	0.0693115	-0.00191341	-0.0081507	-0.00281589		2	0.162554	0.0380844	0.132112	0.0164288	0.0182998	0.0106334		2	0.139686	0.0291332	0.107686	0.00665359	5.52265e-05	0.000595485		2	0.0980545	0.0228722	0.0959581	0.0232022	0.004462	0.00227627		2	0.146649	0.0269619	0.101267	0.0110928	0.00366658	0.0026723		2	0.0375727	0.00875339	0.0260891	0.0110148	0.0110673	0.00571456
3	0.229232	0.0253735	0.109286	0.00209875	-0.0103653	-0.00350248		3	0.197629	0.055248	0.169385	0.0174667	0.0162697	0.00818812		3	0.16712	0.0457083	0.132002	0.0101293	-0.00112734	0.00151633		3	0.126382	0.035515	0.11881	0.0223791	0.00620821	0.00246089		3	0.180091	0.0404612	0.132371	0.0130185	0.00274632	0.00216571		3	0.0438758	0.0128878	0.0263755	0.00885054	0.011281	0.00479259
4	0.268951	0.0360674	0.134843	0.00055707	-0.00876358	-0.00311812		4	0.240258	0.0754755	0.203535	0.0181697	0.0153508	0.00995943		4	0.190597	0.0586121	0.151101	0.0114787	-0.00193773	-0.00119457		4	0.147696	0.0482888	0.13872	0.0242468	0.00338522	0.00267411		4	0.211876	0.0546109	0.15705	0.0136131	0.00200868	0.00208021		4	0.0536497	0.0166851	0.0317563	0.0101465	0.0101902	0.00577874
5	0.294932	0.0417002	0.160954	0.00226408	-0.0100104	-0.00392687		5	0.268611	0.0958953	0.202432	0.0225301	0.0180714	0.00776052		5	0.212002	0.069386	0.170043	0.0126817	-0.00276733	-0.000350568		5	0.162453	0.0602752	0.15494	0.027881	0.00490034	0.00342333		5	0.2345	0.0668142	0.172092	0.0163392	0.00254851	0.0017266		5	0.0591959	0.0225521	0.021158	0.0112994	0.0120066	0.00501874
6	0.325943	0.0510103	0.184575	0.00406587	-0.00930696	-0.00508629		6	0.297811	0.11063	0.224522	0.0228927	0.0155266	0.00802068		6	0.230315	0.0828025	0.186255	0.015467	-0.00290779	0.000380582		6	0.180553	0.0717935	0.167404	0.0195609	0.00286469	0.00219527		6	0.258655	0.0790591	0.190689	0.0154966	0.00154413	0.00137756		6	0.0657368	0.0248346	0.0241104	0.00820331	0.0105644	0.00540293
7	0.343109	0.0581522	0.20336	0.0045387	-0.00925115	-0.00562967		7	0.318446	0.127124	0.245128	0.0295545	0.0131824	0.00971449		7	0.247513	0.0906278	0.197624	0.0177865	-0.00157515	0.00158836		7	0.193934	0.0812273	0.183822	0.0222481	0.00389502	0.00321726		7	0.27575	0.0892829	0.207484	0.0185319	0.00156277	0.00222261		7	0.0679492	0.0286809	0.0264016	0.0105146	0.00943825	0.00630286
8	0.360038	0.0666398	0.224315	0.00754097	-0.00944807	-0.00398584		8	0.340857	0.138946	0.265758	0.0276462	0.0128807	0.00800961		8	0.259923	0.10035	0.214243	0.0229082	-0.00284776	-0.000937649		8	0.205275	0.0931006	0.195273	0.0229342	0.00336497	0.00345907		8	0.291523	0.0997592	0.224897	0.0202574	0.000987456	0.0016363		8	0.0720309	0.0298731	0.0297828	0.00876533	0.00949931	0.00523371
9	0.370443	0.0717893	0.243228	0.00608143	-0.0105654	-0.00473772		9	0.354133	0.156907	0.282272	0.0330998	0.0135809	0.00978091		9	0.272396	0.111987	0.227824	0.0233068	-0.00168801	-0.000577477		9	0.21731	0.100999	0.204535	0.0261753	0.00376757	0.00421425		9	0.303571	0.110421	0.239465	0.0221658	0.00127378	0.00216999		9	0.0717431	0.0353298	0.0326713	0.0114839	0.0101098	0.00625487
10	0.383838	0.078193	0.26016	0.00979242	-0.0114699	-0.00764839		10	0.370599	0.171931	0.307502	0.0359533	0.0128765	0.0102971		10	0.282564	0.117321	0.234956	0.0267896	-0.00407475	0.00210581		10	0.228594	0.111776	0.215321	0.0301977	0.00300286	0.00383427		10	0.316399	0.119806	0.254485	0.0256833	8.36749e-05	0.00214719		10	0.0738021	0.0388129	0.0398256	0.0112487	0.0103756	0.00742119
11	0.391828	0.0840259	0.276362	0.0119143	-0.0111561	-0.00614883		11	0.378781	0.1808	0.317022	0.0373523	0.0131519	0.0122621		11	0.290448	0.129423	0.245405	0.0284272	-0.00363294	0.000548663		11	0.23446	0.117899	0.224696	0.0322322	0.00480029	0.0020833		11	0.323879	0.128037	0.265871	0.0274815	0.000790783	0.00218631		11	0.0747099	0.0401067	0.0401691	0.0110035	0.0105067	0.00760896
12	0.395057	0.0923683	0.288021	0.0123377	-0.0109403	-0.00667957		12	0.398967	0.196234	0.335795	0.0413834	0.013729	0.0110706		12	0.30147	0.13688	0.254618	0.032598	-0.00280935	0.000316952		12	0.243743	0.124841	0.233793	0.0363797	0.00217145	0.00329469		12	0.334809	0.137581	0.278057	0.0306747	0.000537705	0.00200068		12	0.0756099	0.0433865	0.0445032	0.0127432	0.0103219	0.0073512
13	0.401816	0.0957928	0.301537	0.0129906	-0.0102473	-0.00634575		13	0.398924	0.205331	0.339227	0.0427133	0.0115162	0.0119646		13	0.308226	0.143703	0.266019	0.0379418	-0.000874019	0.00101449		13	0.249884	0.134733	0.242086	0.0402569	0.00381283	0.0046645		13	0.339712	0.14489	0.287217	0.0334756	0.00105193	0.00282446		13	0.0739894	0.0453441	0.0424117	0.013795	0.00910141	0.00762226
14	0.404859	0.103421	0.313286	0.0159644	-0.0106349	-0.0077379		14	0.41044	0.218835	0.354202	0.0491993	0.0134965	0.0123645		14	0.312944	0.154691	0.26997	0.0393813	-0.00310589	-0.000160877		14	0.257079	0.141412	0.243111	0.0407512	0.0031315	0.00299095		14	0.34633	0.15459	0.295142	0.0363241	0.00072181	0.00186417		14	0.0744225	0.0480254	0.0488473	0.0142505	0.0102082	0.00832321
15	0.404291	0.10806	0.324267	0.0190288	-0.0100125	-0.00731351		15	0.41516	0.223126	0.366112	0.0488451	0.0117695	0.0114415		15	0.313852	0.161237	0.276763	0.040876	-0.00337242	-0.000366175		15	0.262304	0.146649	0.251555	0.0431907	0.00335544	0.00354959		15	0.348902	0.159768	0.304674	0.0379851	0.000434997	0.00182785		15	0.0734525	0.0478268	0.0508564	0.0130733	0.00932105	0.00782656
16	0.407932	0.112879	0.329514	0.0206684	-0.0112467	-0.00758836		16	0.427497	0.239303	0.387149	0.0559095	0.0136543	0.0143033		16	0.322174	0.169905	0.284662	0.0419673	-0.0037554	0.000782775		16	0.269023	0.155963	0.258445	0.045193	0.00427142	0.00414278		16	0.356657	0.169513	0.314942	0.0409346	0.000730894	0.00291012		16	0.0741982	0.0524781	0.0563764	0.0147667	0.0106948	0.00905662
17	0.40909	0.119568	0.339783	0.0222786	-0.0105801	-0.0067933		17	0.419213	0.242812	0.378925	0.0525925	0.0106071	0.0113087		17	0.327268	0.1725	0.290693	0.0456687	-0.00191492	-0.000853609		17	0.266291	0.160264	0.260513	0.0501243	0.00280632	0.00281466		17	0.355466	0.173786	0.317478	0.042666	0.000229588	0.0016191		17	0.0723109	0.0512795	0.0523949	0.0138903	0.00886529	0.00757627
18	0.408862	0.124012	0.350344	0.0228093	-0.0108286	-0.00633522		18	0.430007	0.252629	0.393296	0.0557891	0.0105005	0.0125998		18	0.323484	0.183494	0.292411	0.0476016	-0.00317552	-0.000165679		18	0.272613	0.169399	0.2655	0.051294	0.0023656	0.00401175		18	0.358742	0.182383	0.325388	0.0443735	-0.000284513	0.00252766		18	0.0736024	0.0532653	0.0574697	0.0147608	0.00899771	0.0079468
19	0.417805	0.131763	0.350238	0.0265445	-0.0118522	-0.00670906		19	0.437241	0.259457	0.401345	0.0588335	0.00787123	0.0119508		19	0.331235	0.188199	0.298567	0.051854	-0.000451416	-0.00177925		19	0.275166	0.167547	0.268816	0.0540265	0.00217383	0.00377353		19	0.365362	0.186741	0.329742	0.0478146	-0.000564643	0.00180899		19	0.0757557	0.053792	0.0583979	0.0144768	0.00828825	0.00800307
20	0.41282	0.132012	0.353992	0.0278071	-0.0127621	-0.00739355		20	0.43464	0.264245	0.412409	0.0606574	0.0119508	0.0111592		20	0.334749	0.193395	0.302884	0.0531531	-0.00316352	-0.000252121		20	0.280985	0.17375	0.26812	0.0564421	0.00248114	0.00377948		20	0.365799	0.19085	0.334351	0.0495149	-0.000373418	0.00182326		20	0.070964	0.0552197	0.0628636	0.0147942	0.0103489	0.0077512
21	0.413842	0.138329	0.363439	0.0317961	-0.0112909	-0.00690808		21	0.440014	0.271755	0.419367	0.0649348	0.0118304	0.0122912		21	0.336452	0.199838	0.305061	0.0563394	-0.00435209	-0.000385385		21	0.281607	0.177823	0.271321	0.0596725	0.0022048	0.00287422		21	0.367978	0.196936	0.339797	0.0531857	-0.000401963	0.00196798		21	0.072449	0.0559953	0.0652836	0.0146922	0.00984205	0.00799401
22	0.413403	0.143486	0.364746	0.0335758	-0.0122187	-0.00878043		22	0.440326	0.275076	0.420471	0.0653002	0.00748791	0.00916926		22	0.338786	0.204523	0.308681	0.0574499	-0.00227029	0.000705938		22	0.28263	0.18554	0.274389	0.0600119	0.00213571	0.00428452		22	0.368786	0.202156	0.342072	0.0540845	-0.00121634	0.00134482		22	0.0717208	0.0548976	0.0641779	0.0140577	0.0083499	0.0075893
23	0.414099	0.147542	0.368467	0.0345815	-0.0123345	-0.00693336		23	0.441158	0.284622	0.429184	0.0704037	0.0122386	0.00911114		23	0.34397	0.214773	0.310409	0.0622258	-0.00351408	-0.000630302		23	0.28407	0.186352	0.281266	0.0629004	0.00278965	0.00448464		23	0.370824	0.208323	0.347331	0.0575279	-0.000205089	0.00150803		23	0.0708685	0.0578508	0.0655095	0.0157402	0.0103583	0.00689195
24	0.377186	0.150231	0.373716	0.0370393	-0.0132075	-0.00719873		24	0.4463	0.292688	0.434993	0.0730898	0.0129471	0.0111883		24	0.342763	0.215049	0.311004	0.06182	-0.00434008	-0.00152593		24	0.283229	0.191659	0.283001	0.0686501	0.00299333	0.00547566		24	0.36237	0.212407	0.350679	0.0601498	-0.000401783	0.00198482		24	0.0680969	0.0598566	0.0678084	0.0160891	0.0110938	0.00803228
25	0.381082	0.154833	0.373296	0.0381945	-0.0123619	-0.00806329		25	0.452117	0.296315	0.441023	0.0755405	0.0117888	0.0114512		25	0.350594	0.221205	0.31213	0.0667496	-0.00518528	-0.00243117		25	0.285874	0.194389	0.280393	0.0681033	0.00345073	0.00424641		25	0.367417	0.216685	0.35171	0.062147	-0.0005769	0.00130079		25	0.0690241	0.0596776	0.0709351	0.0164293	0.0104763	0.0084325
26	0.38472	0.160796	0.37895	0.0391054	-0.0120702	-0.00856982		26	0.452216	0.301398	0.4431	0.0797488	0.0101158	0.0114194		26	0.351207	0.222397	0.311924	0.0673463	-0.000949655	-0.00165199		26	0.279779	0.196857	0.281903	0.0701283	0.00232748	0.00204518		26	0.366981	0.220362	0.353969	0.0640822	-0.000144141	0.000810686		26	0.0717233	0.0596422	0.0719481	0.0174784	0.00920606	0.0083292
27	0.381563	0.161798	0.378828	0.0389085	-0.0116405	-0.00856666		27	0.440241	0.305004	0.452417	0.0788576	0.0115785	0.0101324		27	0.350497	0.229472	0.315851	0.0725412	-0.00446734	-0.00177445		27	0.27987	0.197085	0.281437	0.072445	0.00151394	0.00408441		27	0.363043	0.22334	0.357133	0.0656881	-0.00075386	0.000968928		27	0.0667774	0.061056	0.0752413	0.0181034	0.00982412	0.00800269
28	0.381336	0.165935	0.382013	0.0446509	-0.0129695	-0.00910056		28	0.440257	0.304169	0.457025	0.0858058	0.0128807	0.0111066		28	0.33892	0.2311	0.315796	0.0703225	-0.00294981	-0.000929245		28	0.283435	0.198111	0.282505	0.0735933	0.00308267	0.00342571		28	0.360987	0.224829	0.359335	0.0685931	1.10092e-05	0.00112563		28	0.0663303	0.0592071	0.0771497	0.0172964	0.010837	0.00844014
29	0.385066	0.17088	0.377287	0.0443265	-0.0113004	-0.00917533		29	0.451989	0.309258	0.461411	0.086268	0.011447	0.0106029		29	0.339178	0.236536	0.314443	0.0748163	-0.00441091	-0.0022871		29	0.28931	0.199403	0.286136	0.0766247	0.0025002	0.00282419		29	0.366386	0.229019	0.359819	0.0705089	-0.000441019	0.000491168		29	0.0691807	0.0598668	0.0777047	0.0181643	0.00972391	0.00834366
30	0.385183	0.174552	0.390853	0.0466275	-0.0123461	-0.00719452		30	0.46545	0.304726	0.463305	0.0865295	0.0105365	0.0119604		30	0.336459	0.239619	0.318191	0.0793556	-0.00299423	-0.0018693		30	0.286531	0.201413	0.281881	0.0777063	0.00391289	0.00554713		30	0.368406	0.230078	0.363557	0.0725547	-0.000222739	0.00211094		30	0.0762084	0.0564747	0.0804651	0.0177041	0.00978981	0.00839154
31	0.385236	0.172103	0.392597	0.047571	-0.011272	-0.00975662		31	0.471997	0.309939	0.474872	0.0865835	0.0118317	0.012907		31	0.329941	0.242465	0.315763	0.0813822	-0.00582759	-0.00296782		31	0.283676	0.199737	0.27941	0.0800671	0.000581276	0.0021643		31	0.367712	0.231061	0.365661	0.073901	-0.00117164	0.000586711		31	0.0809757	0.0600251	0.0867596	0.0177774	0.00993068	0.00955505
32	0.385521	0.17941	0.394004	0.0483924	-0.0109971	-0.00754308		32	0.484772	0.314293	0.477499	0.0895006	0.0121653	0.012031		32	0.338295	0.24458	0.32109	0.0841999	-0.00473747	-0.00373859		32	0.290864	0.203623	0.28316	0.0834166	0.00337926	0.00154133		32	0.374863	0.235476	0.368938	0.0763774	-4.75205e-05	0.00057267		32	0.0828386	0.0590282	0.0857537	0.0188514	0.0100463	0.00849872
33	0.402741	0.184491	0.393372	0.0491969	-0.011133	-0.00951441		33	0.486779	0.311396	0.486479	0.0925146	0.00994559	0.00905855		33	0.355547	0.245749	0.31905	0.0824903	-0.0050148	-0.00398111		33	0.274903	0.202807	0.286527	0.0817871	0.00342214	0.00311244		33	0.379992	0.236111	0.371357	0.0764972	-0.000695011	-0.000331131		33	0.0886233	0.0563754	0.0888252	0.0188482	0.00926975	0.00811746
34	0.418776	0.185398	0.389585	0.05031	-0.0133391	-0.00797905		34	0.501778	0.30893	0.5098	0.0947799	0.0123023	0.00740626		34	0.34837	0.248171	0.316789	0.0833848	-0.00380943	-0.00224748		34	0.285198	0.20118	0.282427	0.0851747	0.000602716	0.00147939		34	0.388531	0.23592	0.37465	0.0784124	-0.0010609	-0.000335218		34	0.0931493	0.0554977	0.100568	0.0193915	0.0106403	0.00646292
35	0.414484	0.188504	0.388858	0.051798	-0.0121966	-0.00922166		35	0.498936	0.316416	0.510649	0.0922101	0.0107178	0.00945156		35	0.353346	0.249778	0.319579	0.0889962	-0.00441331	-0.00224868		35	0.291994	0.20325	0.281448	0.0849353	0.00296355	0.00174383		35	0.38969	0.239487	0.375133	0.0794849	-0.000732139	-6.87379e-05		35	0.0883453	0.0575508	0.100691	0.0186964	0.00982755	0.0077985
36	0.411493	0.191697	0.386748	0.0529479	-0.0115005	-0.00833182		36	0.499547	0.31726	0.518311	0.0950664	0.0128073	0.00859774		36	0.358362	0.252511	0.319231	0.088061	-0.00358492	-0.00273731		36	0.304426	0.201981	0.275945	0.0891412	0.00236441	0.00149131		36	0.393457	0.240862	0.375059	0.0813041	2.15885e-05	-0.000245023		36	0.0831437	0.0574491	0.105827	0.0191533	0.0102426	0.00713716
37	0.402928	0.196253	0.393251	0.0542221	-0.012641	-0.0086846		37	0.489271	0.314794	0.527237	0.0956614	0.0114166	0.00894646		37	0.383807	0.253644	0.318957	0.0927889	-0.00472546	-0.0016652		37	0.299362	0.20075	0.288604	0.0878143	0.000358533	0.00116136		37	0.393842	0.24136	0.382012	0.0826217	-0.00139782	-6.04938e-05		37	0.0779241	0.0554595	0.106329	0.0192085	0.0100793	0.00729311
38	0.416208	0.195273	0.405141	0.0539663	-0.013476	-0.00782635		38	0.496344	0.317914	0.51828	0.0973677	0.0109544	0.00926613		38	0.39824	0.251967	0.318055	0.0933447	-0.00391628	-0.00460781		38	0.301307	0.194705	0.289905	0.0905098	0.00109704	0.00285635		38	0.403025	0.239965	0.382846	0.0837971	-0.00133522	-7.79213e-05		38	0.0801076	0.0584978	0.102754	0.0200853	0.0101819	0.00766984
39	0.430456	0.201857	0.399778	0.054993	-0.0136856	-0.00920165		39	0.508115	0.31845	0.529707	0.098757	0.0112547	0.00653445		39	0.381233	0.253694	0.315593	0.0965995	-0.005842	-0.00527293		39	0.296161	0.200563	0.29179	0.0902526	0.00286111	-0.000576511		39	0.403991	0.243641	0.384217	0.0851505	-0.00135295	-0.00212916		39	0.0888582	0.0556748	0.107489	0.0204265	0.0107851	0.00676689
40	0.419935	0.200737	0.388779	0.0551215	-0.0127031	-0.00872883		40	0.510757	0.315856	0.515295	0.0971601	0.014032	0.00567786		40	0.411345	0.25384	0.314019	0.0967304	-0.00457299	-0.00515407		40	0.300722	0.197048	0.288045	0.0936378	7.14683e-06	0.000720639		40	0.410689	0.24187	0.376534	0.0856624	-0.000809222	-0.0018711		40	0.0860081	0.0557323	0.101887	0.020421	0.0112036	0.00636423

## Sheet: Figure 4H_R&Qb_17,18,&ATP
	Replicate 1								Replicate 2								Replicate 3								Replicate 4								Average								Stdev
sQa	w.t.	3Δ	w.t.	3Δ	w.t.	None		sQa	w.t.	3Δ	w.t.	3Δ	w.t.	None		sQa	w.t.	3Δ	w.t.	3Δ	w.t.	None		sQa	w.t.	3Δ	w.t.	3Δ	w.t.	None		sQa	w.t.	3Δ	w.t.	3Δ	w.t.	None		sQa	w.t.	3Δ	w.t.	3Δ	w.t.	None
Qc	w.t.	w.t.	3Δ	3Δ	None	w.t.		Qc	w.t.	w.t.	3Δ	3Δ	None	w.t.		Qc	w.t.	w.t.	3Δ	3Δ	None	w.t.		Qc	w.t.	w.t.	3Δ	3Δ	None	w.t.		Qc	w.t.	w.t.	3Δ	3Δ	None	w.t.		Qc	w.t.	w.t.	3Δ	3Δ	None	w.t.
0	0.0434917	0.00876242	0.00653454	0	0.0267007	0.0488949		0	0.0345801	0.0286238	0.0630028	0.00643064	0	0.0410857			0.0675132	0.00850247	0.0115832	0.000222106	0.00977628	0.0155511			0.059863	0.00805329	0.00532796	0.00242397	0.00939094	0.018041		0	0.051362	0.0134855	0.0216121	0.00226918	0.011467	0.0308931		0	0.0150189	0.0100964	0.0277265	0.00298225	0.0111164	0.0166183
1	0.0836527	0.0110939	-0.00435848	-0.00281895	0.0283565	0.0235973		1	0.0596869	0.0231278	0.0319535	0.0039746	-0.00202058	0.0161092			0.105145	0.00263286	0.0137322	0.000358972	0.00740635	0.0137106			0.0985989	0.00713611	0.00898833	0.00426189	0.01108	0.0192774		1	0.0867709	0.0109977	0.0125789	0.00144413	0.0112056	0.0181736		1	0.0201724	0.00879454	0.0150163	0.00335134	0.0126956	0.00427456
2	0.0935487	0.0101116	-0.00399897	-0.00239389	0.0271131	0.0237295		2	0.0913464	0.0235245	0.0306887	0.00546126	-0.00226882	0.0139305			0.131467	0.00590083	0.0151741	0.00340003	0.00654073	0.0116108			0.122148	0.00774597	0.0104558	0.00309577	0.00888232	0.0174204		2	0.109627	0.0118207	0.0130799	0.00239079	0.0100668	0.0166728		2	0.020219	0.00799057	0.0142949	0.0033584	0.0123367	0.00527574
3	0.117955	0.00917057	-0.00235476	-0.00349355	0.0263972	0.020201		3	0.117251	0.0251096	0.0303115	0.00626561	1.38681e-06	0.0129362			0.15702	0.00545541	0.0205731	0.00112974	0.00801744	0.0143985			0.144542	0.0108274	0.0111776	0.00445724	0.00940999	0.0164913		3	0.134192	0.0126408	0.0149269	0.00208976	0.0109565	0.0160068		3	0.0198232	0.00861068	0.0139198	0.0042871	0.0110975	0.00315393
4	0.142784	0.00769554	-0.00140313	-0.00474548	0.0229375	0.0216391		4	0.143382	0.0217272	0.0276322	0.00583154	-0.00268764	0.0122025			0.178183	0.00620697	0.0266648	-9.24443e-05	0.0083392	0.0111137			0.166943	0.0101556	0.0153037	0.00403796	0.00859764	0.0166462		4	0.157823	0.0114463	0.0170494	0.00125789	0.00929668	0.0154004		4	0.0176297	0.00704464	0.0135154	0.00470853	0.0105056	0.00479843
5	0.166877	0.00472644	-0.0015205	-0.00348932	0.00577535	0.0186943		5	0.166023	0.0226452	0.0299107	0.00508682	-0.00195124	0.0151953			0.200559	0.00926604	0.0306219	0.00272891	0.00856971	0.0100464			0.184351	0.0104046	0.0188021	0.00335067	0.00772215	0.0142043		5	0.179453	0.0117606	0.0194536	0.00191927	0.00502899	0.0145351		5	0.0164108	0.00765977	0.0149935	0.00374124	0.00479828	0.00355867
6	0.187752	0.00568019	6.55569e-05	-0.00522446	0.00549409	0.0165669		6	0.181579	0.0222028	0.0306832	0.00620043	-0.00141177	0.0131927			0.216417	0.00925283	0.0353762	0.00035537	0.00560789	0.0111798			0.200473	0.00926587	0.0200397	0.00266339	0.00968872	0.0145891		6	0.196555	0.0116004	0.0215412	0.000998681	0.00484473	0.0138821		6	0.0154015	0.00726686	0.0156891	0.00479482	0.00460479	0.00227198
7	0.209744	0.00440077	-7.19011e-05	-0.0065779	0.00229661	0.0176422		7	0.200592	0.0222722	0.0309578	0.00651385	-0.0044267	0.0135214			0.229178	0.01254	0.0395241	0.000456219	0.00579518	0.0103574			0.215869	0.011367	0.0245077	0.00181053	0.00797586	0.0127297		7	0.213846	0.012645	0.0237294	0.000550675	0.00291024	0.0135627		7	0.011995	0.00735514	0.0170179	0.00541517	0.00542189	0.00303382
8	0.226079	0.00408779	0.00182819	-0.00737833	0.00398523	0.0157865		8	0.21625	0.0226965	0.0312962	0.00496756	-0.00320076	0.0127989			0.243298	0.0127573	0.0417224	0.00122459	0.00562229	0.0085517			0.228381	0.00953625	0.026878	0.00199516	0.00816287	0.0151298		8	0.228502	0.0122695	0.0254312	0.000202243	0.00364241	0.0130667		8	0.0111792	0.00781819	0.0169213	0.00530512	0.00487514	0.00327165
9	0.246744	0.00210945	0.000640766	-0.00905637	0.00112504	0.0124357		9	0.231011	0.0203362	0.0297013	0.00376658	-0.00147695	0.0122858			0.252453	0.0115015	0.0459652	-0.000190891	0.00678925	0.0096058			0.240499	0.0130191	0.0286612	0.00223934	0.00855118	0.0144032		9	0.242677	0.0117416	0.0262421	-0.000810336	0.00374713	0.0121826		9	0.00918257	0.00749077	0.0188171	0.0057338	0.00470814	0.00197027
10	0.265494	0.00472327	0.00144119	-0.00746926	0.00210099	0.0128967		10	0.246476	0.0192947	0.0316318	0.00489405	-0.000798803	0.011584			0.262386	0.0118569	0.0510317	0.00199055	0.00805346	0.0102973			0.252463	0.012096	0.0314353	0.00313031	0.00698484	0.0115243		10	0.256705	0.0119927	0.028885	0.000636415	0.00408512	0.0115756		10	0.00879646	0.00594959	0.0204751	0.00553422	0.00416115	0.00106177
11	0.28426	0.00435531	0.00314885	-0.00776638	-0.0015501	0.0130025		11	0.265354	0.0208562	0.0299371	0.00580519	-0.00220087	0.0113926			0.271714	0.0125484	0.0526957	0.0027085	0.0089815	0.00608091			0.254981	0.0108132	0.0342071	0.00239895	0.00914913	0.0118721		11	0.269077	0.0121433	0.0299972	0.000786565	0.00359492	0.010587		11	0.012248	0.00679465	0.0204433	0.00590573	0.00632263	0.00307895
12	0.295894	0.00155222	0.00368916	-0.00618667	-0.000358448	0.0125002		12	0.279957	0.020608	0.03354	0.00782161	0.000320353	0.0118295			0.280787	0.0135989	0.0592688	0.00163158	0.00642428	0.00540019			0.260116	0.0122342	0.0373267	0.00306956	0.0081462	0.0145367		12	0.279189	0.0119983	0.0334562	0.00158402	0.00363309	0.0110666		12	0.0146741	0.00787116	0.0228572	0.00581665	0.00428429	0.00394913
13	0.309512	0.00275868	0.00514305	-0.0125256	-0.0015427	0.0104331		13	0.29348	0.0196483	0.0313974	0.00699369	-0.00111222	0.00780497			0.279266	0.0115699	0.0596746	0.000310949	0.00586961	0.00506403			0.270181	0.0134956	0.0373493	0.00275391	0.00915985	0.0111931		13	0.28811	0.0118681	0.0333911	-0.000616764	0.00309364	0.0086238		13	0.0171906	0.00698215	0.0224233	0.00840558	0.00528173	0.00278193
14	0.319354	0.00140313	0.00570239	-0.00888191	-0.00299553	0.00869581		14	0.302977	0.0193002	0.0321366	0.00770928	-0.00324791	0.0100072			0.284197	0.0159653	0.0666511	0.00120778	0.00711821	0.00451897			0.276086	0.0126987	0.042152	0.00202017	0.0072052	0.010999		14	0.295653	0.0123418	0.0366605	0.000513831	0.00201999	0.00855524		14	0.0194037	0.00777456	0.0252221	0.0068994	0.00593814	0.00285139
15	0.32238	-0.000757077	0.00750944	-0.00989487	-0.00257787	0.00835216		15	0.317053	0.0196996	0.0342833	0.00691464	-0.00204277	0.00850115			0.295669	0.0142448	0.0655814	0.00220306	0.0054266	0.00485633			0.279006	0.0133693	0.0431466	0.00394029	0.00943143	0.0124057		15	0.303527	0.0116392	0.0376302	0.000790778	0.00255935	0.00852884		15	0.0200117	0.00872584	0.024015	0.00738464	0.00585995	0.00308488
16	0.335953	0.000419776	0.00762892	-0.0105039	-0.00184934	0.00652291		16	0.331771	0.0245091	0.0326039	0.00826816	0.000298164	0.00958147			0.29666	0.0169041	0.0672826	-0.000621898	0.00553105	0.00504002			0.277592	0.0161221	0.0475848	0.00391646	0.00887398	0.0124974		16	0.310494	0.0144888	0.0387751	0.000264705	0.00321346	0.00841046		16	0.0281351	0.0101134	0.0251559	0.00804446	0.00488343	0.00331649
17	0.33654	-0.000238966	0.00856787	-0.00919806	-0.00302936	0.00520543		17	0.332722	0.0166195	0.0311658	0.00458064	-0.000355024	0.0083805			0.304935	0.015515	0.0734344	0.00173963	0.00677605	0.00466063			0.288217	0.0153657	0.046371	0.00324704	0.00789963	0.0108429		17	0.315604	0.0118153	0.0398848	9.23133e-05	0.00282282	0.00727237		17	0.0230592	0.00805563	0.02723	0.00630138	0.0053463	0.00289081
18	0.3457	0.000364793	0.00830352	-0.0103009	-0.00309175	0.00412057		18	0.354123	0.0191616	0.0299912	0.00958563	-0.000198314	0.00960921			0.303692	0.0161453	0.0781899	0.00186209	0.00591403	0.00530654			0.285826	0.0164103	0.0513404	0.00609148	0.00801398	0.00912055		18	0.322335	0.0130205	0.0419563	0.00180958	0.00265949	0.00703922		18	0.0328478	0.00854664	0.0298698	0.00866926	0.0051803	0.00273602
19	0.354064	-0.00116628	0.00999849	-0.0106329	-0.00330322	0.00521178		19	0.356628	0.0183281	0.0320908	0.00569286	0.000761359	0.00968271			0.303688	0.0149532	0.0769845	0.00192212	0.00797182	0.00433408			0.290799	0.0166354	0.0527674	0.002231	0.00926587	0.01237		19	0.326295	0.0121876	0.0429603	-0.000196732	0.00367396	0.00789963		19	0.0339721	0.00900858	0.0286266	0.00716437	0.00596952	0.00379039
20	0.354351	-0.000291834	0.00991496	-0.0115211	-0.0034079	0.00481843		20	0.357689	0.016908	0.0343499	0.00837634	0.00171132	0.00755534			0.311397	0.0175992	0.0820245	0.000936449	0.00384664	0.00559468			0.294167	0.0155658	0.0517847	0.00343167	0.00762805	0.0110025		20	0.329401	0.0124453	0.0445185	0.000305839	0.00244453	0.00724275		20	0.031561	0.00853328	0.0303332	0.00846912	0.00460519	0.00275845
21	0.360334	-0.000897707	0.0117357	-0.011851	-0.00538201	0.00241609		21	0.36564	0.0198536	0.0337647	0.00840407	0.00290537	0.00811146			0.313692	0.0186257	0.0835853	0.00133144	0.00826236	0.00382263			0.295176	0.0142722	0.0540967	0.00389383	0.00713611	0.00995911		21	0.33371	0.0129635	0.0457956	0.000444586	0.00323046	0.00607732		21	0.0347078	0.00954603	0.0305602	0.00870285	0.00618747	0.00354468
22	0.370022	-0.00354007	0.0129063	-0.0122803	-0.00416815	0.00495906		22	0.375991	0.016657	0.0314695	0.00631276	-0.000808511	0.00681479			0.312479	0.0152389	0.0840547	1.56075e-05	0.00498599	0.00534376			0.299131	0.0167867	0.0581692	0.00370206	0.00753871	0.0107893		22	0.339406	0.0112856	0.0466499	-0.000562466	0.00188701	0.00697674		22	0.0392556	0.00990864	0.031096	0.00822793	0.0053378	0.00266457
23	0.369306	-0.00209888	0.0126779	-0.0111045	-0.00392073	4.22948e-05		23	0.383321	0.0177845	0.0316442	0.00822101	0.000192767	0.00653604			0.318429	0.0181167	0.0887897	0.000675924	0.00676044	0.00361493			0.297556	0.0152632	0.062586	0.00447034	0.00877035	0.0112622		23	0.342153	0.0122664	0.0489245	0.000565696	0.00295071	0.00536387		23	0.040759	0.00966121	0.033607	0.00836771	0.0058653	0.00474491
24	0.373581	-0.00064711	0.0134635	-0.0106488	-0.00561569	0.0020016		24	0.388631	0.0193973	0.0349379	0.0096633	0.000721142	0.00943725			0.318959	0.0168957	0.0898811	0.000555866	0.00619617	0.00231951			0.298583	0.0172608	0.0621167	0.00290161	0.00586874	0.00994243		24	0.344939	0.0132267	0.0500998	0.000618001	0.00179259	0.0059252		24	0.0430243	0.00931477	0.0331615	0.00844544	0.00553887	0.00435386
25	0.374697	-0.0016569	0.0141032	-0.00995302	-0.00544863	0.00217818		25	0.396658	0.0188717	0.0367727	0.00794088	0.00213985	0.00985052			0.32065	0.0185285	0.0962105	0.00037578	0.00583119	0.00140707			0.297582	0.0152168	0.063284	0.00304098	0.00818193	0.00962916		25	0.347397	0.01274	0.0525926	0.000351153	0.00267609	0.00576623		25	0.0460757	0.00973841	0.0353484	0.00755018	0.00596008	0.0046
26	0.381854	-0.00106794	0.0134561	-0.0122517	-0.00407193	-0.00213906		26	0.402447	0.0212709	0.0342986	0.00888946	-0.000355024	0.0105384			0.325544	0.0201168	0.0948695	0.0012426	0.00380582	0.0037626			0.303715	0.0182316	0.0637736	0.00510045	0.00704797	0.00958747		26	0.35339	0.0146378	0.0515994	0.000745191	0.00160671	0.00543735		26	0.0464031	0.0105452	0.0354718	0.00920987	0.00484901	0.00587227
27	0.39497	-0.000102565	0.0152325	-0.0118986	-0.00430244	0.00111975		27	0.407331	0.0174613	0.0329229	0.00863844	0.00233816	0.00916682			0.327409	0.0214447	0.100458	-0.000243717	0.0037626	0.00398591			0.297337	0.0179409	0.0681212	0.00323275	0.00847376	0.0115802		27	0.356762	0.0141861	0.0541837	-6.77763e-05	0.00256802	0.00646318		27	0.0529467	0.00968984	0.0378805	0.00869273	0.00527765	0.00476736
28	0.399108	-0.00226594	0.0151468	-0.0126948	-0.00237062	0.000474759		28	0.405846	0.0175251	0.0374037	0.00865231	-0.00133411	0.00929857			0.327674	0.0196498	0.102108	0.00107451	0.00559828	0.00295582			0.301616	0.0198062	0.0677734	0.000937426	0.00950409	0.00903717		28	0.358561	0.0136788	0.0556079	-0.000507632	0.00284941	0.00544158		28	0.0518865	0.0106806	0.0377656	0.00888862	0.00567426	0.00442165
29	0.398595	-0.00208408	0.0176179	-0.010763	-0.00488716	-0.00115148		29	0.420579	0.0187497	0.0375271	0.0077287	-0.000406336	0.0100863			0.324674	0.0175848	0.100238	-0.0012618	0.00455258	0.00230631			0.308487	0.0176384	0.0687549	0.00371159	0.00843207	0.0102998		29	0.363084	0.0129722	0.0560346	-0.000146122	0.00192279	0.00538522		29	0.0548419	0.0100519	0.0362131	0.00797615	0.00580479	0.0057289
30	0.411317	-0.00341319	0.0173144	-0.00995196	-0.00498444	-0.00196036		30	0.416027	0.016216	0.0330532	0.00700339	-0.00115521	0.00964249			0.325803	0.0193881	0.102511	-0.000153674	0.00491035	0.00203498			0.304985	0.0181005	0.0724093	0.00172119	0.00827603	0.00972088		30	0.364533	0.0125729	0.056322	-0.000345262	0.00176168	0.0048595		30	0.0574059	0.0107367	0.0385368	0.00708516	0.00595453	0.00580226
31	0.414443	-0.00430455	0.0194842	-0.010708	-0.00646793	-0.00115465		31	0.419445	0.0191144	0.0358102	0.0103831	-0.0003259	0.00987964			0.324517	0.0185501	0.104413	-0.000886025	0.00519729	0.00253081			0.312262	0.0185234	0.0691087	0.00486461	0.00824863	0.010108		31	0.367667	0.0129708	0.057204	0.000913413	0.00166302	0.00534095		31	0.0571568	0.0115201	0.0376425	0.00901075	0.00647893	0.00558015
32	0.41947	-0.00224374	0.0194059	-0.0110929	-0.00469049	-0.00259373		32	0.425887	0.0175778	0.0364052	0.00964665	0.000679537	0.00937484			0.327404	0.0192776	0.103697	0.0010445	0.00561989	0.000838002			0.313014	0.0188069	0.0730752	0.00246923	0.00785318	0.0107048		32	0.371444	0.0133547	0.0581459	0.00051688	0.00236553	0.00458097		32	0.0595092	0.0104236	0.0377326	0.00860676	0.00557779	0.00647992
33	0.43294	-0.000753905	0.0171241	-0.0134624	-0.00548881	-0.00182396		33	0.430834	0.0182352	0.0348963	0.00866063	-0.00154213	0.0108892			0.331324	0.019627	0.109539	-0.000122459	0.00657435	0.000444213			0.316391	0.0196645	0.0752597	0.00111729	0.00665846	0.00924443		33	0.377872	0.0141932	0.0592049	-0.000951742	0.00155047	0.00468848		33	0.0626737	0.00998691	0.0414448	0.00919934	0.00606758	0.00631484
34	0.449908	-0.00310549	0.0198426	-0.0112303	-0.00604075	-0.00174043		34	0.435757	0.0204901	0.035752	0.00576913	-0.00293865	0.00930134			0.332655	0.0236273	0.108872	0.00170602	0.00606651	0.000202897			0.317039	0.0167426	0.0754896	0.00218217	0.00915747	0.0126606		34	0.38384	0.0144386	0.059989	-0.000393252	0.00156114	0.0051061		34	0.0686597	0.0120299	0.0401205	0.00744887	0.00721202	0.00696628
35	0.474205	-0.00220462	0.0197453	-0.0101973	-0.00310127	-0.0027407		35	0.443996	0.0183239	0.0320672	0.00884785	-0.00107478	0.00949549			0.325088	0.022859	0.113135	0.000440611	0.00466544	0.00350688			0.327445	0.0200135	0.0758362	0.00334948	0.00683833	0.0111109		35	0.392683	0.0147479	0.0601959	0.000610168	0.00183193	0.00534315		35	0.0776828	0.0114556	0.0427186	0.00800402	0.00468608	0.00630423
36	0.462335	-0.00239811	0.0225896	-0.0116067	-0.00286441	-0.00209676		36	0.447647	0.0207217	0.0362762	0.00689106	0.00013036	0.0089061			0.33067	0.0231471	0.114477	-0.000737153	0.00719505	0.00114775			0.320701	0.0170893	0.0768832	0.00255618	0.00708846	0.00986858		36	0.390338	0.01464	0.0625566	-0.000724164	0.00288736	0.00445642		36	0.0750056	0.0116283	0.0415894	0.00789901	0.00506259	0.00585897
37	0.479679	-0.00334235	0.0212637	-0.00964533	-0.00502462	-0.00350941		37	0.453279	0.0209616	0.0376394	0.0067191	0.00132995	0.0126158			0.334621	0.0229814	0.112911	0.000902833	0.00405434	-2.64127e-05			0.328419	0.0172489	0.0775836	0.00519217	0.00656555	0.0108465		37	0.399	0.0144624	0.0623493	0.000792194	0.00173131	0.00498162		37	0.0787011	0.0121049	0.041179	0.0073811	0.00498565	0.0079552
38	0.511104	-0.000390169	0.0232516	-0.00867466	-0.00389641	-0.00264131		38	0.455867	0.0230862	0.0377102	0.00724331	0.00315222	0.0118226			0.334891	0.0233704	0.114196	0.00101689	0.00657435	0.00259925			0.332236	0.0190261	0.0760613	0.00104225	0.00773525	0.00967443		38	0.408524	0.0162731	0.0628048	0.000156946	0.00339135	0.00536373		38	0.0894533	0.0112847	0.0408698	0.00657615	0.00523353	0.00663379
39	0.532192	-0.00361303	0.0230464	-0.00968128	-0.00399263	-0.00286336		39	0.462842	0.0190867	0.036487	0.00644312	-0.00100821	0.0127032			0.323421	0.0241592	0.113366	0.000651912	0.00552985	0.00108652			0.339591	0.0195835	0.0791774	0.00214286	0.00667752	0.0100615		39	0.414512	0.0148041	0.0630191	-0.000110846	0.00180163	0.00524697		39	0.100159	0.0124885	0.0412214	0.00683639	0.00513623	0.00734534
40	0.552789	-0.00170871	0.0217184	-0.0113636	-0.00219193	-0.00308858		40	0.465365	0.0206122	0.0372054	0.00695902	-0.000445166	0.0100197			0.322172	0.0219753	0.119262	0.000762365	0.0043749	0.000937649			0.319868	0.0189558	0.0817192	0.00101604	0.00608314	0.00856905		40	0.415049	0.0149586	0.0649761	-0.000656533	0.00195524	0.00410946		40	0.114294	0.01118	0.044233	0.00769085	0.00390962	0.00623675

## Sheet: Figure 4I_R&Qc_No 17&18
	Replicate 1								Replicate 2								Replicate 3								Replicate 4								Replicate 5								Average								Stdev
sQa	w.t.	3Δ	w.t.	3Δ	w.t.	None		sQa	w.t.	3Δ	w.t.	3Δ	w.t.	None		sQa	w.t.	3Δ	w.t.	3Δ	w.t.	None		sQa	w.t.	3Δ	w.t.	3Δ	w.t.	None		sQa	w.t.	3Δ	w.t.	3Δ	w.t.	None		sQa	w.t.	3Δ	w.t.	3Δ	w.t.	None		sQa	w.t.
sQb	w.t.	w.t.	3Δ	3Δ	None	w.t.		sQb	w.t.	w.t.	3Δ	3Δ	None	w.t.		sQb	w.t.	w.t.	3Δ	3Δ	None	w.t.		sQb	w.t.	w.t.	3Δ	3Δ	None	w.t.		sQb	w.t.	w.t.	3Δ	3Δ	None	w.t.		sQb	w.t.	w.t.	3Δ	3Δ	None	w.t.		sQb	w.t.
0	0.0161222	0	0.000814739	0.00445284	0.00130571	0.00416955		0	0.0148263	0.00356095	0.00609853	0.0104452	0	0.00730218		0	0.0018901	0.00911696	0.000168199	0.000416221	0.000875205	0		0	0.00736582	0	0.0043889	0.0101566	0.00853477	0.00601903		0	0.0128037	0.00642875	0.00108222	0.0117585	0	0.013862		0	0.0106016	0.00382133	0.00251052	0.00744589	0.00214314	0.00627055		0	0.00590626
1	0.0196762	-0.00084456	-0.00306299	0.0021098	-0.00436658	0.00434953		1	0.00127244	-0.00176641	-0.000608602	0.00444676	-0.00530964	-0.00618294		1	0.00342812	0.00661963	-0.00332692	-0.00173188	-0.00173901	-0.00169767		1	0.000532312	-0.00109782	0.00305516	0.00813642	0.00588032	0.00492596		1	0.0127857	0.00820215	-0.000387447	0.00910141	0.000230794	0.014137		1	0.00753897	0.0022226	-0.00086616	0.0044125	-0.00106082	0.00310638		1	0.00836814
2	0.0244358	-0.000691197	-0.00447734	-0.000353586	-0.00287448	0.00649661		2	0.00390068	-6.46119e-05	0.000541906	0.00448948	-0.00695203	-0.00455722		2	0.00543653	0.00425201	-0.00450146	-0.00070273	-0.0062818	-0.00353503		2	0.000787205	-0.00110967	0.00212095	0.00639841	0.00608305	0.0061779		2	0.0155589	0.00826075	-0.000412559	0.00817345	3.70705e-05	0.0122524		2	0.0100238	0.00212946	-0.0013457	0.00360101	-0.00199764	0.00336693		2	0.00977487
3	0.0318419	-0.00228872	-0.00431226	-0.000354651	-0.00528462	0.00251025		3	0.00889976	-0.0020457	0.000884766	0.00404345	-0.00645285	-0.00552744		3	0.00878483	0.00152662	-0.00600527	0.00125151	-0.00633027	-0.0015366		3	0.0029449	-0.00363134	0.00453828	0.00614589	0.0040937	0.00625733		3	0.0186034	0.00773339	-0.000902847	0.00829303	-0.00136204	0.0121627		3	0.014215	0.00025885	-0.00115947	0.00387585	-0.00306722	0.00277325		3	0.0113437
4	0.034874	-0.00426966	-0.0061835	-0.000353586	-0.00666808	0.00218435		4	0.0145543	-0.00254279	0.000434567	0.0037454	-0.00574108	-0.00520126		4	0.0174941	-0.000846697	-0.00666809	0.00117027	-0.00649134	-0.00739505		4	0.00428813	-0.00314763	0.00076705	0.00641264	0.00556141	0.00548198		4	0.0210297	0.00730289	0.00153065	0.00710558	-0.00135846	0.011865		4	0.0184481	-0.000700777	-0.00202386	0.00361606	-0.00293951	0.001387		4	0.0111024
5	0.0434133	0.00100112	-0.00287768	0.00350072	-0.00167634	0.00129506		5	0.0180997	-0.00122241	0.0011578	0.00625172	-0.00558372	-0.00812338		5	0.0234167	0.00362768	-0.00533533	-0.00316015	-0.00282802	-0.00742356		5	0.00261414	-0.00162657	0.000725556	0.00328041	0.00609372	0.00301841		5	0.0276929	0.0068712	0.000194919	0.00728735	-0.000756956	0.0101597		5	0.0230473	0.0017302	-0.00122695	0.00343201	-0.000950262	-0.000214751		5	0.0148196
6	0.0485872	-0.00582352	-0.00633047	-0.000254539	-0.00400234	0.0020246		6	0.0226861	-0.00285022	0.000584633	0.00266889	-0.00868717	-0.00703436		6	0.030846	-0.000922244	-0.00820326	-0.00462262	-0.0066182	-0.00840567		6	0.00510379	-0.00282516	0.001821	0.00544997	0.00354361	0.00275996		6	0.0305772	0.00522336	-0.00112527	0.00674564	-0.00258298	0.0103331		6	0.02756	-0.00143956	-0.00265067	0.00199747	-0.00366942	-6.44727e-05		6	0.0157328
7	0.0543884	-0.00233985	-0.00633899	0.000389797	-0.000637946	0.00133021		7	0.0290284	-0.00218534	0.00111299	0.00577443	-0.0078962	-0.00688221		7	0.0391604	0.000192431	-0.00733946	-0.00273395	-0.00478227	-0.00642007		7	0.00304449	-0.00335036	0.00161827	0.00551755	0.0052176	0.00367757		7	0.0328397	0.00574354	-0.000138715	0.00667748	-0.00405862	0.0111283		7	0.0316923	-0.000387915	-0.00221718	0.00312506	-0.00243149	0.000566767		7	0.0187082
8	0.0639075	-3.94057e-05	-0.0051451	0.00117791	-0.00790244	0.00184674		8	0.0317328	-0.00348904	0.00118177	0.0029909	-0.00765442	-0.00678425		8	0.0442278	-0.00477372	-0.00715843	-0.000420497	-0.00486067	-0.00476944		8	0.00404154	-0.00386015	0.000455251	0.00437823	0.00539069	0.00429643		8	0.0349396	0.00436236	0.000327656	0.00588943	-0.00245742	0.00859438		8	0.0357698	-0.00155999	-0.00206777	0.0028032	-0.00349685	0.000636774		8	0.0217194
9	0.067864	-0.00288087	-0.00474146	0.000380212	-0.00289365	0.00110975		9	0.0369392	-0.00453117	-0.000626318	0.00229789	-0.00847666	-0.00557746		9	0.048916	-0.00156226	-0.00468819	-0.00491483	-0.00704725	-0.00678925		9	0.00677778	-0.00228574	0.00164436	0.0041103	0.00498642	0.00414942		9	0.0387231	0.00360302	0.000605087	0.00706492	-0.00331004	0.0108868		9	0.039844	-0.0015314	-0.00156131	0.0017877	-0.00334824	0.000755846		9	0.0221951
10	0.072434	-0.00219287	-0.00360189	-0.00146547	-0.00287874	0.00410671		10	0.0427439	-0.00357971	-0.000733657	-0.000662793	-0.0076711	-0.00764087		10	0.0594512	-0.00103913	-0.00488775	-1.85304e-05	-0.004453	-0.00499608		10	0.00701964	-0.00167162	0.00155188	0.00365386	0.00512276	0.00146415		10	0.0407058	0.00507627	-0.00124246	0.00571604	-0.0029764	0.00859438		10	0.0444709	-0.000681412	-0.00178277	0.00144462	-0.0025713	0.000305658		10	0.0246277
11	0.0757729	-0.00305021	-0.00279035	-0.000582565	-0.00610681	0.00135683		11	0.0458588	-0.0017737	0.00141208	-0.00171326	-0.00745954	-0.00772737		11	0.0614454	-0.00485354	-0.00890884	-0.00570309	-0.00795097	-0.00690043		11	0.0115176	-0.00533023	-0.000288088	0.00432133	0.00368706	0.00531956		11	0.0450156	0.0048383	-0.0021764	0.00480362	-0.00304337	0.00719766		11	0.047922	-0.00203388	-0.00255032	0.000225208	-0.00417473	-0.000150751		11	0.0239611
12	0.0832514	-0.0024538	-0.00569572	-0.00124181	-0.00519835	0.00344959		12	0.0479754	-0.00553265	-0.0031764	-0.00343172	-0.00912278	-0.00771278		12	0.0681933	-0.00759176	-0.0110954	-0.00435037	-0.00459126	-0.00837574		12	0.0121803	-0.00171786	-0.000427983	0.0021411	0.00535157	0.00307176		12	0.0462066	0.00410407	0.00063259	0.00366281	-0.00471991	0.00694654		12	0.0515614	-0.0026384	-0.00395259	-0.000643999	-0.00365615	-0.000524126		12	0.0268015
13	0.0854933	-0.00244635	-0.00529314	-0.00236754	-0.00480856	0.00274881		13	0.0581465	-0.00510434	-4.48115e-05	-0.00367662	-0.00684052	-0.00624547		13	0.0701604	-0.00247452	-0.00482075	-0.00349227	-0.00563894	-0.00481363		13	0.0104826	-0.00249321	0.00114168	0.00280857	0.00505755	0.00351634		13	0.048438	0.00312947	-0.00239404	0.0027492	-0.00355279	0.00797734		13	0.0545442	-0.00187779	-0.00228221	-0.000795733	-0.00315665	0.000636679		13	0.0282551
14	0.0890238	-0.00186165	-0.00030992	-0.00106608	-0.00293626	0.00277118		14	0.0593043	-0.00527733	-0.00143188	-0.00384545	-0.00554724	-0.00788369		14	0.0794441	-0.00427625	-0.00623049	-0.00572162	-0.00358349	-0.0026527		14	0.0125064	-0.00317371	-0.000113813	0.00500894	0.00464498	0.00438535		14	0.0509648	0.00322633	-0.00327536	0.00252438	-0.00354562	0.00881322		14	0.0582487	-0.00227252	-0.00227229	-0.000619964	-0.00219353	0.00108667		14	0.0297611
15	0.0965556	-0.00366473	-0.00260716	-0.00294691	-0.00528462	0.000908461		15	0.0630997	-0.00568793	0.000180288	-0.00254279	-0.00839954	-0.00735637		15	0.0877671	-0.00623904	-0.00818188	-0.00559333	-0.00870644	-0.0048122		15	0.0138792	-0.0028797	0.000686433	0.00326145	0.00472797	0.00404154		15	0.055424	0.00278507	-0.00280301	0.00232468	-0.00554384	0.00588345		15	0.0633451	-0.00313727	-0.00254507	-0.00109938	-0.00464129	-0.000267026		15	0.0324386
16	0.104545	-0.00509505	-0.00357101	0.00151446	-0.00451035	-0.00195644		16	0.0649995	-0.00344527	-1.6674e-05	-0.00424979	-0.00705728	-0.00685615		16	0.0862006	-0.00766873	-0.00383579	-0.00257002	-0.00546932	-0.00475804		16	0.0156694	-0.00456911	0.0012057	0.0057096	0.00557682	0.00407236		16	0.055149	0.00485743	-0.00443292	0.00292618	-0.00265353	0.00598749		16	0.0653128	-0.00318415	-0.00213014	0.000666085	-0.00282273	-0.000702156		16	0.0337022
17	0.102424	-0.0032941	-0.00449225	-0.000398317	-0.00533787	0.0036413		17	0.0697391	-0.0061944	-0.00208738	-0.00430503	-0.00824635	-0.00837974		17	0.0872938	-0.00608652	-0.00854394	-0.00426627	-0.00664814	-0.00654408		17	0.0175046	-0.00329938	-4.38653e-05	0.00485008	0.00462008	0.00482281		17	0.0584542	0.0034057	-0.0026619	0.00170166	-0.00195278	0.00774056		17	0.0670831	-0.00309374	-0.00356587	-0.000483575	-0.00351301	0.00025617		17	0.0323921
18	0.105692	-0.004865	-0.00511528	0.00029927	-0.00433356	-0.000759358		18	0.0710668	-0.00481984	0.000310554	-0.00499804	-0.00815985	-0.00866529		18	0.0924952	-0.00171477	-0.00661963	-0.00176609	-0.00518138	-0.00377165		18	0.0178793	-0.00365623	0.000891533	0.00509786	0.0030765	0.00396922		18	0.0602587	-0.000764131	-0.00315817	0.00226728	-0.00417581	0.00398568		18	0.0694785	-0.003164	-0.0027382	0.000180056	-0.00375482	-0.00104828		18	0.0338793
19	0.105478	-0.0041131	-0.00605143	-0.00283082	-0.00439427	-0.00164652		19	0.0768339	-0.00494593	-0.00069093	-0.00206133	-0.00746997	-0.00793371		19	0.103226	-0.000775426	-0.00790535	-0.00507163	-0.00731381	-0.00991946		19	0.0212356	-0.0033634	-0.000468292	0.00240785	0.00518441	0.00228455		19	0.0644393	-0.0021465	-0.00256743	0.00249927	-0.00483232	0.00609272		19	0.0742426	-0.00306887	-0.00353669	-0.00101133	-0.00376519	-0.00222448		19	0.0343812
20	0.110361	-0.00700995	-0.0040737	-0.00143564	-0.00309494	0.000957451		20	0.0795007	-0.00761378	-0.00244587	-0.00546804	-0.00858087	-0.00733345		20	0.103385	-0.00982539	-0.00827311	-0.00420925	-0.00520419	-0.00398974		20	0.0228787	-0.00353175	0.000112627	0.00332309	0.00428695	0.00500539		20	0.0626013	-0.00222782	-0.00385414	-0.000625416	-0.00511095	0.0049531		20	0.0757455	-0.00604174	-0.00370684	-0.00168305	-0.0035408	-8.14489e-05		20	0.0351568
21	0.115153	-0.00452739	-0.00444965	-0.00132701	-0.00577879	-0.00199797		21	0.0875574	-0.00553057	4.16851e-06	-0.00235625	-0.00746267	-0.00716775		21	0.103405	-0.00558763	-0.00477657	-0.00233483	-0.00521132	-0.00377022		21	0.0213506	-0.00193126	0.00156137	0.00320572	0.00366927	0.0035685		21	0.0651449	-0.00298836	-0.00369749	0.00181048	-0.00424039	0.00410885		21	0.0785222	-0.00411304	-0.00227163	-0.000200378	-0.00380478	-0.00105172		21	0.0370478
22	0.117711	-0.00542946	-0.00442622	-0.00416316	-0.00215453	0.00166356		22	0.0862006	-0.00213428	-0.000826407	-0.00228851	-0.00595888	-0.00799207		22	0.112622	-0.00711995	-0.00980828	-0.00554201	-0.00436034	-0.00715416		22	0.0218639	-0.00290578	0.00145823	0.00375463	0.00409014	0.00404154		22	0.0641392	-0.00177699	-0.00329808	0.00224815	-0.0053824	0.00407178		22	0.0805074	-0.00387329	-0.00338015	-0.00119818	-0.0027532	-0.00107387		22	0.0392265
23	0.117805	-0.00558815	-0.00326322	-0.00028649	-0.00380851	3.62106e-05		23	0.0863736	-0.00555871	-0.00346299	-0.00291379	-0.00825052	-0.0077701		23	0.116763	-0.00751621	-0.00807355	-0.00246454	-0.00760316	-0.00570024		23	0.0285243	-0.00244579	0.00015175	0.00350448	0.00349263	0.00348077		23	0.0692083	-0.0022613	-0.00288672	0.00106428	-0.00338657	0.00407297		23	0.0837348	-0.00467403	-0.00350694	-0.000219211	-0.00391123	-0.00117608		23	0.037141
24	0.124214	-0.00185846	-0.00454656	0.00102029	-0.0019181	0.000346131		24	0.0911788	-0.00673839	0.000918114	-0.000351197	-0.00611312	-0.00719484		24	0.117829	-0.00872069	-0.0125294	-0.00617347	-0.00911268	-0.00655121		24	0.0278533	-0.00161827	0.000607001	0.00303263	0.00414824	0.0026663		24	0.0676393	-0.000478329	-0.00370825	0.00127236	-0.00503202	0.00196952		24	0.0857429	-0.00388283	-0.00385182	-0.000239878	-0.00360554	-0.00175282		24	0.0394273
25	0.127978	-0.00390968	-0.00267959	-0.000620906	-0.00563927	0.00103839		25	0.0945657	-0.00520647	-0.0049897	-0.00420498	-0.00614334	-0.00802855		25	0.121638	-0.00373031	-0.00568028	-0.00849975	-0.00375739	-0.00424774		25	0.0288871	-0.0014357	0.000768236	0.00336696	0.0041186	0.00319505		25	0.0694725	-0.00253275	-0.00556656	-0.000255906	-0.00448912	0.00157968		25	0.0885082	-0.00336298	-0.00362958	-0.00204292	-0.00318211	-0.00129263		25	0.0406484
26	0.130965	-0.00629	-0.00418446	-0.00248149	-0.00294478	-0.000154428		26	0.0965333	-0.00622046	-0.00336711	-0.00393924	-0.00652893	-0.00808899		26	0.124085	-0.006775	-0.0110484	-0.00355356	-0.00471242	-0.00493764		26	0.0307614	-0.000582105	0.000282161	0.00380206	0.00261176	0.00410674		26	0.0707951	-0.00321557	-0.00466251	-0.00130106	-0.00667987	0.00145532		26	0.0906281	-0.00461663	-0.00459606	-0.00149466	-0.00365085	-0.0015238		26	0.0411057
27	0.135605	-0.00372543	-0.00204803	-0.00408009	-0.00231535	-0.00191064		27	0.0990792	-0.00501576	-0.00556704	-0.00367246	-0.00812025	-0.00779824		27	0.12593	-0.00534246	-0.0083344	-0.00443589	-0.00475091	-0.00454707		27	0.032484	-0.00324011	-0.000315356	0.00446478	0.00388149	0.0037001		27	0.0742953	-0.00271691	-0.00494592	-0.00174471	-0.00749064	-0.00026906		27	0.0934786	-0.00400813	-0.00424215	-0.00189367	-0.00375913	-0.00216498		27	0.0416754
28	0.1358	-0.000188508	-0.00626124	0.00166143	-0.000763618	-0.00058363		28	0.102907	-0.00606622	-0.00554099	-0.00384962	-0.00879659	-0.00694786		28	0.131383	-0.00756325	-0.00776851	-0.00705866	-0.00679923	-0.00621766		28	0.0336411	-0.0019692	0.00112983	0.00344521	0.00322469	0.00260347		28	0.0749363	-0.0038087	-0.00612381	-0.0016024	-0.00476775	0.00156175		28	0.0957336	-0.00391918	-0.00491295	-0.00148081	-0.0035805	-0.00191679		28	0.0424727
29	0.135849	-0.00247084	-0.00536663	0.000515469	0.000240694	-0.00387773		29	0.10463	-0.00736575	-0.00567647	-0.00446343	-0.00816402	-0.00708646		29	0.134428	-0.00634595	-0.0072796	-0.00770437	-0.00570309	-0.00483216		29	0.0350804	-0.00103736	0.000525198	0.0025845	0.00329464	0.00234146		29	0.0754086	-0.00397252	-0.00453576	-0.000724669	-0.00491125	0.00116354		29	0.0970792	-0.00423848	-0.00446665	-0.0019585	-0.0030486	-0.00245827		29	0.0426279
30	0.145359	-0.00713349	-0.00549549	-8.52015e-05	-0.00402896	-0.00143138		30	0.10524	-0.00626006	-0.00519604	-0.00543573	-0.00688012	-0.00882369		30	0.132585	-0.00607369	-0.00743782	-0.00286651	-0.0046269	-0.00399686		30	0.0369642	-0.0022893	0.00179492	0.00325907	0.00469833	0.0041352		30	0.0757901	-0.00601499	-0.00329091	0.00014589	-0.00592172	0.000579974		30	0.0991877	-0.00555431	-0.00392507	-0.000996496	-0.00335187	-0.00190735		30	0.0438834
31	0.142793	-0.00459981	-0.00312902	0.00155493	-0.00364449	-0.0021982		31	0.113618	-0.0092395	-0.00710835	-0.00365474	-0.00800666	-0.00874345		31	0.140295	-0.00731523	-0.007807	-0.00297342	-0.00436605	-0.00696885		31	0.0387532	-0.00293661	-0.00121519	0.00243749	0.00408422	0.00297454		31	0.0803127	-0.00457642	-0.00580094	-0.00246818	-0.00512052	0.000291781		31	0.103154	-0.00573351	-0.0050121	-0.00102078	-0.0034107	-0.00292883		31	0.0439586
32	0.146829	-0.00104904	-0.00278396	0.000988337	-0.00438894	0.000203418		32	0.111583	-0.00820258	-0.00430294	-0.00443946	-0.00858504	-0.00816923		32	0.142713	-0.00659967	-0.00630033	0.000421923	-0.00173758	-0.00132136		32	0.0388374	-0.00263666	0.00285125	0.0051607	0.00425138	0.00394195		32	0.0804586	-0.00371781	-0.00448314	-0.000820335	-0.00645625	-0.00124844		32	0.104084	-0.00444115	-0.00300383	0.000262232	-0.00338329	-0.00131873		32	0.0452515
33	0.150332	-0.00272645	-0.00214069	-0.000306725	-0.00271473	-0.00121306		33	0.118159	-0.00737722	-0.00406325	-0.00459995	-0.00543886	-0.00712294		33	0.144469	-0.00702302	-0.00741216	-0.00578291	-0.00373459	-0.00271257		33	0.0404237	-0.0017226	-0.000471849	0.00178781	0.00541085	0.0053492		33	0.0809082	-0.00502485	-0.00222304	-0.000469959	-0.00514084	0.00295368		33	0.106858	-0.00477483	-0.0032622	-0.00187435	-0.00232364	-0.000549136		33	0.0461496
34	0.149276	-0.00229724	-0.008272	-0.000531444	-0.00252196	-0.00287022		34	0.117423	-0.00734908	-0.00452283	-0.00487611	-0.0083662	-0.00705312		34	0.144348	-0.00640582	-0.0122885	-0.00600812	-0.00677215	-0.0079082		34	0.0414112	-0.000467106	0.00169059	0.0029947	0.00385541	0.0022312		34	0.0822846	-0.00491125	-0.00575311	-0.00112288	-0.00654952	0.00133454		34	0.106948	-0.0042861	-0.00582917	-0.00190877	-0.00407088	-0.00285316		34	0.0452865
35	0.147704	-0.00547632	-0.00296501	-0.00226529	-0.00611534	-0.00148251		35	0.119327	-0.00909985	-0.00478753	-0.00511059	-0.00912382	-0.00697912		35	0.148061	-0.0063488	-0.00533248	-0.00457273	-0.00330126	-0.00508161		35	0.0439317	-0.00371788	0.00103617	0.000962666	0.00325196	0.00452287		35	0.0825501	-0.00409689	-0.00530467	-0.00293335	-0.00810768	0.00122811		35	0.108315	-0.00574795	-0.0034707	-0.00278386	-0.00467923	-0.00155845		35	0.044893
36	0.151415	-0.00199371	-0.0037052	-0.00238351	-0.000985142	-0.00115235		36	0.120748	-0.00699371	-0.00635281	-0.00457494	-0.00607456	-0.0083985		36	0.149346	-0.0052213	-0.0096914	-0.00617775	-0.00264129	-0.0042962		36	0.0466383	-0.00354479	3.79376e-05	0.00390994	0.00359103	0.00498286		36	0.0821411	-0.00508464	-0.00540632	-0.00435399	-0.00675401	-0.0019456		36	0.110058	-0.00456763	-0.00502356	-0.00271605	-0.0025728	-0.00216196		36	0.0451931
37	0.151871	-0.00312157	-0.00469141	-0.00231109	-0.00273177	0.00170935		37	0.124174	-0.00667378	-0.00800562	-0.00596618	-0.00749498	-0.00668629		37	0.147371	-0.00585988	-0.0107662	-0.00431046	-0.00470672	-0.0035279		37	0.0458037	-0.00331835	-0.000782462	0.00240192	0.00251574	0.00264259		37	0.0822583	-0.00500691	-0.00708047	-0.00133215	-0.00646821	0.00063857		37	0.110295	-0.0047961	-0.00626522	-0.00230359	-0.00377719	-0.00104474		37	0.0453898
38	0.155731	-0.00344427	-0.00367538	-0.000352521	-0.00497257	-0.000427072		38	0.123767	-0.00841726	-0.00576505	-0.00429669	-0.00734387	-0.00722298		38	0.149091	-0.00580144	-0.00880907	-0.00271684	-0.00673366	-0.00640296		38	0.0472868	-0.00393958	-0.00331124	0.000263192	0.00285125	0.00195023		38	0.0855444	-0.00657822	-0.00463023	-0.00129508	-0.00805746	-6.57703e-05		38	0.112284	-0.00563615	-0.00523819	-0.00167959	-0.00485126	-0.00243371		38	0.0455904
39	0.153373	-0.00354332	-0.00527078	-0.000368496	-0.00442196	-0.00130997		39	0.126307	-0.0056723	-0.00611624	-0.0034484	-0.00817653	-0.00610582		39	0.152767	-0.0061079	-0.00707291	-0.00336683	-0.00467536	-0.00176751		39	0.0503277	-0.0051109	0.0014025	0.00301959	0.00271135	0.00162065		39	0.0854081	-0.00528195	-0.0063845	-0.00253873	-0.00493636	-0.00145771		39	0.113637	-0.00514327	-0.00468838	-0.00134057	-0.00389977	-0.00180407		39	0.0449322
40	0.158072	-0.00217051	-0.00524948	-0.00370413	-0.00444432	0.00232813		40	0.128508	-0.00735533	-0.00612041	-0.00469895	-0.00562644	-0.00356407		40	0.151593	-0.00806072	-0.0114418	-0.00467536	-0.00228352	-0.003679		40	0.0504688	-0.00218141	5.09786e-05	0.00211621	0.00291527	0.00198224		40	0.0847145	-0.00553188	-0.00687718	-0.00388523	-0.00707927	0.000639765		40	0.114671	-0.00505997	-0.00592758	-0.00296949	-0.00330366	-0.000458587		40	0.0459828
[truncated: 5 more columns]

## Sheet: Figure 4J_R&Qc_17,18,&AMP-PNP
	Replicate 1								Replicate 2								Replicate 3								Replicate 4								Replicate 5								Average								Stdev
sQa	w.t.	3Δ	w.t.	3Δ	w.t.	None		sQa	w.t.	3Δ	w.t.	3Δ	w.t.	None		sQa	w.t.	3Δ	w.t.	3Δ	w.t.	None		sQa	w.t.	3Δ	w.t.	3Δ	w.t.	None		sQa	w.t.	3Δ	w.t.	3Δ	w.t.	None		sQa	w.t.	3Δ	w.t.	3Δ	w.t.	None		sQa	w.t.
sQb	w.t.	w.t.	3Δ	3Δ	None	w.t.		sQb	w.t.	w.t.	3Δ	3Δ	None	w.t.		sQb	w.t.	w.t.	3Δ	3Δ	None	w.t.		sQb	w.t.	w.t.	3Δ	3Δ	None	w.t.		sQb	w.t.	w.t.	3Δ	3Δ	None	w.t.		sQb	w.t.	w.t.	3Δ	3Δ	None	w.t.		sQb	w.t.
0	0.0784499	0.00109476	0.00695725	0.00429597	0.00428319	0		0	0.0510808	0.000253397	0.00843613	0	0.000349333	0.00380825		0	0.0330927	0.00165372	0.00405912	0.0123546	0	0.00236002			0.0430639	0.0113256	0.0120013	0.00793369	0.00992779	0.0227305			0.0408685	0.00899139	0.0186393	0.00651604	0.0089041	0.0151212		0	0.0493112	0.00466376	0.0100186	0.00622007	0.00469288	0.008804		0	0.0175039
1	0.118567	0.00267619	0.0129976	0.00293497	-0.00379971	-0.00158037		1	0.0862946	0.00494801	0.0194073	-0.000289894	-0.00322533	-0.00249434		1	0.0922875	0.00712119	0.0283685	0.0130709	-0.00121972	0.00333296			0.0682438	0.0181318	0.0204507	0.00577955	0.00833441	0.00886317			0.065964	0.0151774	0.0312959	0.00635221	0.00746672	0.0144228		1	0.0862714	0.00961091	0.022504	0.00556954	0.00151127	0.00450885		1	0.0213108
2	0.144928	0.00870801	0.0219218	0.00228004	-0.00235991	-0.00155375		2	0.114595	0.0193822	0.0372191	-0.00342138	-0.00370814	-0.0022545		2	0.130034	0.0136169	0.0507574	0.0137247	-0.000242526	0.00434845			0.0849102	0.0284449	0.0268515	0.00647191	0.00985073	0.0104447			0.0876419	0.0297138	0.0395614	0.00651724	0.00909663	0.0135523		2	0.112422	0.0199732	0.0352622	0.0051145	0.00252736	0.00490743		2	0.0261843
3	0.169538	0.0143756	0.0334764	0.002509	-0.00358991	-0.00387638		3	0.13301	0.0383109	0.0505667	-0.0041628	-0.00182904	-0.00329937		3	0.157572	0.0400069	0.073518	0.0106527	0.00416265	0.00730273			0.098231	0.0397112	0.0332404	0.00479673	0.00961599	0.0106818			0.100678	0.0378849	0.0454281	0.00713787	0.0100222	0.0144587		3	0.131806	0.0340579	0.0472459	0.0041867	0.00367638	0.00505349		3	0.0323472
4	0.184761	0.0229761	0.0389353	0.000781666	-0.00334498	-0.00424166		4	0.15066	0.0525782	0.0658258	-0.00284889	-0.0012649	-0.00386143		4	0.180619	0.0623958	0.0861506	0.0120455	0.00208345	0.0050817			0.108786	0.0511339	0.041065	0.00631661	0.00888332	0.0122716			0.115442	0.0514778	0.0518306	0.00852383	0.00742726	0.0127475		4	0.148054	0.0481124	0.0567615	0.00496373	0.00275683	0.00439954		4	0.0354266
5	0.199107	0.0332751	0.0502897	0.00383804	-0.00298929	-0.00446423		5	0.16309	0.0677445	0.0750711	-0.00362368	-0.00377697	-0.00309394		5	0.192203	0.0748072	0.0984329	0.00946135	-0.00070914	0.00126227			0.125106	0.0581785	0.0480266	0.00856796	0.00942156	0.0108928			0.12758	0.0633475	0.05943	0.00706612	0.00631993	0.0133717		5	0.161417	0.0594706	0.0662501	0.00506196	0.00165322	0.00359372		5	0.0347652
6	0.207409	0.0384539	0.0552768	0.00109263	-0.00406701	-0.00461971		6	0.171631	0.0806594	0.0823914	-0.00365913	-0.00389167	-0.00391044		6	0.204269	0.0925357	0.112115	0.0144097	-0.00154734	0.00331878			0.133201	0.0675988	0.0471766	0.00544404	0.00907775	0.0111477			0.137563	0.0688196	0.064602	0.00844371	0.00618839	0.0123732		6	0.170815	0.0696135	0.0723124	0.0051462	0.00115202	0.00366191		6	0.0352827
7	0.216451	0.0465922	0.0615695	0.000539925	-0.00458883	-0.00342485		7	0.180708	0.0917379	0.0917901	-0.00109597	-0.00242343	-0.00510026		7	0.219303	0.105327	0.120118	0.00791826	-0.00299257	0.00040421			0.139559	0.0738218	0.0540433	0.00874461	0.00982346	0.00939429			0.143409	0.0774822	0.0673404	0.00899379	0.00783623	0.0119367		7	0.179886	0.0789923	0.0789723	0.00502012	0.00153097	0.00264202		7	0.0382368
8	0.222696	0.0589274	0.0694352	0.00182318	-0.00418734	-0.00499776		8	0.190003	0.0971385	0.0963324	-0.00429627	-0.00396988	-0.00580727		8	0.232446	0.125797	0.130709	0.0124979	0.00330034	0.0056561			0.147598	0.080628	0.0556212	0.00814354	0.00579141	0.011271			0.15285	0.0875032	0.0707808	0.0107337	0.00588345	0.0113484		8	0.189119	0.0899989	0.0845757	0.00578041	0.00136359	0.00349409		8	0.0388743
9	0.228958	0.0671264	0.0783796	0.00222253	-0.00184022	0.00111712		9	0.198767	0.110428	0.103484	0.000220028	-0.0034683	-0.00377175		9	0.236688	0.130988	0.140011	0.00994498	0.00181398	9.50248e-05			0.154453	0.0856737	0.0571328	0.0090078	0.0107351	0.00988511			0.159253	0.092241	0.0715676	0.0087044	0.00748585	0.00981771		9	0.195624	0.0972914	0.090115	0.00601995	0.00294529	0.00342864		9	0.0381615
10	0.232134	0.0761198	0.0821165	0.00198398	-0.00412238	-0.00241422		10	0.204778	0.116821	0.109957	0.000512007	-0.00484165	-0.00454341		10	0.237793	0.14436	0.143007	0.0145374	0.0020948	0.00169343			0.155329	0.0905167	0.0604855	0.0104482	0.00691886	0.00995268			0.161665	0.0979738	0.0757578	0.00941472	0.00720723	0.0101788		10	0.19834	0.105158	0.0942648	0.00737927	0.00145137	0.00297347		10	0.0385195
11	0.238498	0.0798694	0.0861611	0.00282529	-0.00256225	-0.00232689		11	0.212649	0.124311	0.114695	-0.000342033	-0.00181653	-0.00112412		11	0.252592	0.15397	0.147548	0.0145913	-0.00227492	0.00119845			0.16411	0.0956999	0.0650226	0.00932079	0.00746777	0.0110837			0.166587	0.104037	0.0811533	0.00937645	0.00668824	0.01123		11	0.206887	0.111577	0.098916	0.00715435	0.00150046	0.00401222		11	0.0405443
12	0.24935	0.0916775	0.0923527	0.00425657	-0.0046474	-0.00292539		12	0.21158	0.128889	0.116005	-0.000666339	-0.00580205	-0.00641625		12	0.254841	0.158691	0.148639	0.0122979	0.00346911	0.0014665			0.166937	0.100548	0.0658739	0.00928048	0.0055211	0.00931249			0.170431	0.108134	0.0801752	0.00806942	0.0055821	0.0118733		12	0.210628	0.117588	0.100609	0.00664761	0.000824574	0.00266214		12	0.0417726
13	0.244648	0.0934719	0.0934932	0.000732679	-0.00301378	-0.00426189		13	0.224323	0.13559	0.123229	0.000740377	-0.00213041	-0.00243699		13	0.262644	0.167537	0.156354	0.0127716	0.0010084	0.000670847			0.17113	0.101642	0.0700411	0.0116385	0.00696984	0.010587			0.174502	0.110359	0.0829363	0.0103869	0.005954	0.00846523		13	0.215449	0.12172	0.105211	0.00725403	0.00175761	0.00260483		13	0.0412296
14	0.248071	0.0992002	0.0945624	0.00315542	-0.00299568	-0.00379012		14	0.229344	0.138588	0.123052	0.00193749	-0.0012065	-0.00251207		14	0.269781	0.173	0.165706	0.0121688	0.00315709	0.000660919			0.175783	0.106523	0.0745829	0.0113825	0.0082372	0.00817792			0.175109	0.113474	0.0843115	0.00891606	0.00413755	0.00859677		14	0.219618	0.126157	0.108443	0.00751205	0.00226593	0.00222668		14	0.0427876
15	0.248581	0.103049	0.101577	0.00564418	-0.00177632	-0.00207344		15	0.231748	0.145672	0.129954	0.00118356	-0.00297506	-0.00323785		15	0.271448	0.183343	0.168632	0.0125631	-0.00549584	-0.00139842			0.176846	0.113039	0.0724133	0.00896512	0.00975707	0.00983887			0.180506	0.11713	0.088821	0.0118889	0.00504877	0.0107062		15	0.221826	0.132446	0.11228	0.00804897	0.000911723	0.00276707		15	0.0418544
16	0.253635	0.107574	0.106527	0.00446955	-0.00378373	-0.00308513		16	0.236491	0.148436	0.127944	0.00130452	-0.00529317	-0.0040971		16	0.275609	0.182185	0.16926	0.0164804	-0.00140693	0.000882171			0.180463	0.113699	0.0734365	0.00943104	0.00691412	0.00901729			0.184713	0.119653	0.0905083	0.00963594	0.00401797	0.00980695		16	0.226182	0.134309	0.113535	0.0082643	8.96497e-05	0.00250483		16	0.0421688
17	0.231066	0.107226	0.104329	0.00321718	-0.00235032	-0.00378906		17	0.241679	0.151092	0.133332	0.00248183	-0.00341929	-0.00350376		17	0.274925	0.187905	0.167899	0.0159713	-0.00262949	0.00108782			0.182756	0.116372	0.07505	0.0110825	0.00704927	0.0103653			0.183761	0.123286	0.0948372	0.00966584	0.00398927	0.0102602		17	0.222837	0.137176	0.11509	0.00848372	0.000527887	0.00288409		17	0.0395896
18	0.233293	0.113245	0.110805	0.00272412	-0.00522673	-0.00287321		18	0.240134	0.155894	0.136382	0.00333065	-0.00282803	-0.00349541		18	0.287507	0.197535	0.172793	0.0165485	-0.00352301	0.00076729			0.181691	0.11873	0.0759546	0.01129	0.00565033	0.0101542			0.183889	0.125036	0.094537	0.00971367	0.00590378	0.00863743		18	0.225303	0.142088	0.118094	0.00872139	-4.73204e-06	0.00263807		18	0.0440745
19	0.235637	0.117527	0.107133	0.002837	-0.00514686	-0.00602011		19	0.248058	0.162383	0.138812	0.00173206	-0.00122944	-0.000867597		19	0.285123	0.197806	0.176644	0.0158394	0.000711977	-3.68753e-05			0.184835	0.121576	0.079235	0.00933501	0.00812101	0.0104708			0.184372	0.128384	0.0958823	0.0107815	0.00372738	0.00981053		19	0.227605	0.145535	0.119541	0.008105	0.00123681	0.00267135		19	0.0432708
20	0.242417	0.123129	0.114375	0.00248983	-0.00384763	-0.00278695		20	0.244746	0.162687	0.139513	0.00410544	-0.00220653	-0.00314191		20	0.293156	0.205429	0.180445	0.0178278	-0.000212742	-0.000992797			0.185068	0.123486	0.081056	0.0109936	0.00812101	0.00817792			0.185903	0.128463	0.0976079	0.0104945	0.00523771	0.00800723		20	0.230258	0.148639	0.122599	0.00918224	0.00141836	0.0018527		20	0.0456164
21	0.23656	0.124199	0.117306	0.0024057	-0.0030649	-0.00479755		21	0.250376	0.170684	0.148702	0.00421181	-0.00287496	-0.00175605		21	0.299791	0.209215	0.185071	0.0164918	-0.00182958	0.00374568			0.189479	0.126442	0.0805106	0.0140796	0.00970728	0.010747			0.189514	0.13345	0.100565	0.00989424	0.00540751	0.00685565		21	0.233144	0.152798	0.126431	0.00941662	0.00146907	0.00295895		21	0.0462616
22	0.245256	0.125316	0.119185	0.00384017	-0.00250154	-0.00466124		22	0.253273	0.173168	0.147409	0.00378739	-0.00271333	-0.00123779		22	0.294856	0.207592	0.182605	0.0157982	0.00243661	0.00156153			0.190532	0.127327	0.083152	0.0123024	0.00708721	0.00936939			0.188878	0.135288	0.0998477	0.0107887	0.00454293	0.00857047		22	0.234559	0.153738	0.12644	0.00930339	0.00177038	0.00272047		22	0.0450708
23	0.241916	0.129716	0.11916	0.00171029	-0.00197972	-0.00547592		23	0.252571	0.169891	0.151304	0.00484373	-0.00124091	-0.00323472		23	0.30256	0.211176	0.186437	0.0182221	-0.00307767	0.00121121			0.188704	0.12786	0.0830121	0.00961125	0.00780328	0.00981872			0.189231	0.135651	0.101327	0.00951397	0.00529869	0.00853937		23	0.234996	0.154859	0.128248	0.00878026	0.00136073	0.00217173		23	0.0478517
24	0.245	0.134773	0.127646	0.00217461	-0.00229601	-0.00619902		24	0.255587	0.175658	0.149598	0.00706904	-0.00364245	-0.00178212		24	0.297426	0.212561	0.183453	0.0180476	9.50248e-05	0.00165655			0.189933	0.13146	0.0836962	0.0112437	0.00715716	0.0090078			0.19106	0.138021	0.10341	0.00869842	0.00363291	0.00763533		24	0.235801	0.158494	0.129561	0.00944669	0.000989328	0.00206371		24	0.0457695
25	0.251504	0.134978	0.122014	0.00446103	-0.00271666	-0.0033109		25	0.255798	0.178588	0.149316	0.00602625	-0.00207097	-0.00273835		25	0.308299	0.213926	0.18688	0.0139587	-0.00229194	0.00265644			0.195642	0.133538	0.0855978	0.0117476	0.00683588	0.00988037			0.190003	0.137254	0.105818	0.00949364	0.0048957	0.00736986		25	0.240249	0.159657	0.129925	0.00913745	0.000930401	0.00277148		25	0.048769
26	0.249649	0.135656	0.125812	0.00495197	-0.00406381	-0.00160486		26	0.259763	0.179327	0.153331	0.00696789	-0.00308873	-0.00180715		26	0.302375	0.217788	0.185449	0.0194829	-0.00232173	-0.00207778			0.192667	0.13179	0.0873679	0.0118389	0.00700541	0.00961955			0.191116	0.142765	0.104486	0.00860395	0.00392948	0.00766881		26	0.239114	0.161465	0.131289	0.0103691	0.000292124	0.00235971		26	0.047435
27	0.253067	0.134903	0.129287	0.000873251	-0.00374965	-0.0030042		27	0.256085	0.182066	0.153836	0.00565085	-0.00294899	-0.0059324		27	0.304598	0.218635	0.186356	0.0223266	-0.00401941	-0.000692121			0.194128	0.136664	0.0896512	0.0116836	0.00594553	0.0092129			0.19147	0.144209	0.106794	0.00964312	0.00339733	0.00705894		27	0.23987	0.163296	0.133185	0.0100355	-0.000275039	0.00132863		27	0.0475966
28	0.246996	0.13884	0.130502	0.00110541	-0.00297331	-0.0033322		28	0.254756	0.182908	0.153574	0.006727	-0.00347769	-0.00169661		28	0.306102	0.21583	0.191403	0.0155642	-0.00393715	-0.00131616			0.190546	0.138493	0.0875872	0.0115793	0.00789694	0.0084826			0.189655	0.143351	0.105592	0.011749	0.00487059	0.00890769		28	0.237611	0.163884	0.133732	0.00934497	0.000475877	0.00220906		28	0.0489589
29	0.258893	0.135981	0.126786	0.00305105	-0.00387106	-0.00368895		29	0.261383	0.183086	0.153498	0.00535574	-0.00327121	-0.00374151		29	0.305723	0.218964	0.186592	0.0146636	-0.00647445	0.000802747			0.190936	0.13585	0.0893963	0.0117927	0.00694732	0.0100155			0.19283	0.146217	0.110433	0.0117956	0.0037501	0.00725984		29	0.241953	0.16402	0.133341	0.00933173	-0.000583861	0.00212953		29	0.0493632
30	0.258768	0.134824	0.127632	-0.000613405	-0.00550468	-0.00199463		30	0.260822	0.183562	0.155133	0.00788449	-0.00229413	-0.00198025		30	0.304867	0.22011	0.188368	0.0193709	-0.00100272	1.84377e-05			0.194819	0.135095	0.0883696	0.0130197	0.00776653	0.0101696			0.19283	0.145236	0.115006	0.00809333	0.00254471	0.00520781		30	0.242421	0.163765	0.134902	0.009551	0.000301944	0.0022842		30	0.0480377
31	0.254003	0.136571	0.128192	0.00270921	-0.0041735	-0.00549403		31	0.261426	0.186595	0.15614	0.00801693	-0.0033244	-0.00229204		31	0.303869	0.216796	0.18804	0.0175952	-0.00160833	-0.00120979			0.191931	0.137569	0.0922701	0.0109711	0.00582105	0.00991949			0.192545	0.145269	0.110439	0.0114715	0.00521977	0.00583203		31	0.240755	0.16456	0.135016	0.0101528	0.000386917	0.00135113		31	0.0482032
32	0.260431	0.140102	0.130293	0.00141105	-0.00568359	-0.00450576		32	0.261042	0.183503	0.153782	0.00727864	-0.00219402	-0.00246931		32	0.31226	0.221436	0.188421	0.0175938	-0.00315709	-0.000236853			0.190429	0.13801	0.0894971	0.0116741	0.00817199	0.00771911			0.194425	0.147368	0.111678	0.0105364	-0.000479525	0.00618599		32	0.243718	0.166084	0.134734	0.00969879	-0.000668446	0.00133864		32	0.0513492
33	0.266837	0.139872	0.131229	0.00334711	-0.00446636	-0.00731081		33	0.264231	0.183501	0.15708	0.00820463	-0.00112725	-0.00287079		33	0.320136	0.220978	0.193632	0.0182589	-0.00765162	-0.000997051			0.192923	0.141374	0.0901065	0.00987681	0.00621346	0.00956382			0.190718	0.151256	0.114687	0.0117645	0.00442694	0.00637135		33	0.246969	0.167396	0.137347	0.0102904	-0.000520967	0.000951304		33	0.0550708
34	0.267066	0.1421	0.13022	0.0019925	-0.00761752	-0.00562182		34	0.262788	0.181583	0.153648	0.00702315	-0.00270394	-0.00169035		34	0.315414	0.218675	0.181469	0.0131574	-0.00704886	-0.00443496			0.194873	0.137262	0.0899085	0.0111003	0.00554244	0.00910265			0.191381	0.152609	0.116295	0.00970291	0.00376804	0.00632471		34	0.246304	0.166446	0.134308	0.00859525	-0.00161197	0.000736044		34	0.0527747
35	0.26518	0.135815	0.12473	0.0014185	-0.0100147	-0.00550574		35	0.268966	0.180186	0.153539	0.010018	-0.00441932	-0.00339322		35	0.319839	0.221463	0.187172	0.0153827	-0.00664606	0.00108357			0.195213	0.140273	0.088928	0.00972269	0.00658098	0.00756617			0.188395	0.152099	0.116981	0.010595	0.00454891	0.00643831		35	0.247519	0.165967	0.13427	0.00942738	-0.00199004	0.00123782		35	0.0553032
36	0.275321	0.13549	0.127153	0.00400204	-0.00932142	-0.00417244		36	0.270177	0.181296	0.154028	0.0090326	-0.00406999	-0.00055789		36	0.322025	0.21718	0.187761	0.0131858	-0.00940178	-0.00104102			0.194236	0.140139	0.0906163	0.00969779	0.0053326	0.00874105			0.188367	0.151474	0.116834	0.00847839	0.00240719	0.00606641		36	0.250025	0.165116	0.135278	0.00887932	-0.00301068	0.00180722		36	0.0573239
37	0.269403	0.136178	0.128729	0.000729484	-0.0093129	-0.00119912		37	0.270087	0.183092	0.155666	0.00767489	-0.00546628	-0.00194479		37	0.325948	0.215641	0.187792	0.0134552	-0.00838204	-0.00133177			0.18694	0.13984	0.0890573	0.0089177	0.00657743	0.00907775			0.190239	0.154334	0.118396	0.0108868	0.00354322	0.00585116		37	0.248523	0.165817	0.135928	0.00833282	-0.00260811	0.00209065		37	0.0593405
38	0.275718	0.138123	0.130908	-0.000936082	-0.00877404	-0.00492535		38	0.277972	0.18058	0.154173	0.010139	-0.00381138	0.000899923		38	0.332289	0.219802	0.183969	0.0123632	-0.00977621	-0.0033202			0.186819	0.139933	0.0896536	0.00898409	0.00900306	0.00857271			0.186337	0.15152	0.120038	0.0102817	0.00153544	0.00533337		38	0.251827	0.165992	0.135748	0.00816637	-0.00236463	0.00131209		38	0.063725
39	0.272809	0.136936	0.128394	-0.00140785	-0.00944921	-0.00702008		39	0.28002	0.184075	0.155066	0.0114665	-0.00445895	-0.00360386		39	0.321492	0.218099	0.188977	0.0126312	-0.00682619	-0.00400664			0.185695	0.139339	0.0887561	0.00796689	0.00480266	0.00727927			0.188439	0.156109	0.118317	0.01247	0.00364487	0.0059277		39	0.249691	0.166912	0.135902	0.00862535	-0.00245736	-0.000284725		39	0.0601185
40	0.274468	0.134366	0.128702	-0.00469319	-0.0106324	-0.00718941		40	0.280087	0.17837	0.154932	0.0116489	-0.00487502	-0.00316694		40	0.331532	0.213511	0.185001	0.0108442	-0.0129858	-0.00694532			0.185867	0.137084	0.0911237	0.00730061	0.00775823	0.00883116			0.183632	0.155148	0.121366	0.00909663	0.0030051	0.00587149		40	0.251117	0.163696	0.136225	0.00683943	-0.00354596	-0.000519804		40	0.0645424
[truncated: 5 more columns]

[truncated: 2 more sheets: Figure 4K_R&Qb_17,18,&ATPgammaS, Figure 4L_R&Qc_17,18,&ATP]
