# Supplementary material for: Sec17/Sec18 can support membrane fusion without help from completion of SNARE zippering
Source: eLife journal article supplement (doi:10.7554/elife.67578), 2021-05-04
Supplement: supp [file elife-67578-supp-v1.zip › elife_poa_e67578_Figure_5_source_data_1.xlsx]

## Sheet: Figure5A_without 18_Sec17 w.t. 
	Replicate 1						Replicate 2						Replicate 3						Replicate 4						Average						Stdev
	100nM	500nM	1000nM	2000nM	0nM		100nM	500nM	1000nM	2000nM	0nM		100nM	500nM	1000nM	2000nM	0nM		100nM	500nM	1000nM	2000nM	0nM		100nM	500nM	1000nM	2000nM	0nM		100nM	500nM	1000nM	2000nM	0nM
Time (min)	w.t.	w.t.	w.t.	w.t.	Buffer	Time (min)	w.t.	w.t.	w.t.	w.t.	Buffer	Time (min)	w.t.	w.t.	w.t.	w.t.	Buffer	Time (min)	w.t.	w.t.	w.t.	w.t.	Buffer	Time (min)	w.t.	w.t.	w.t.	w.t.	Buffer	Time (min)	w.t.	w.t.	w.t.	w.t.	Buffer
0	0	0.010694	0.00271232	0.00892582	0	0	0.00170784	0.0101507	0	0.00846416	0.0190178	0	0.00557658	0.0103558	0.00428365	0.0157216	0.018388	0	0.00944285	0.00527239	0.00300746	0.00617398	0.0182017	0	0.0139019	0.00371689	0.0087057	0.00190659	0.00785465	0	0.00927448	0.00503181	0.00298572	0.00165774	0.0014737
1	0.00250149	0.0126954	0.00782371	0.0139712	0.00278075	1	-0.00607431	0.0109499	-0.00340027	0.0136465	0.0165846	1	0.00366057	0.0112203	0.00711211	0.026562	0.015159	1	0.00625148	-0.00400186	0.00113262	0.00880912	0.0150536	1	0.0123945	0.000892885	0.00654781	0.00185202	0.0121423	1	0.00644709	0.00631838	0.00917787	0.00564647	0.00289117
2	0.00285124	0.0103495	0.0111468	0.018343	0.00260781	2	-0.00984623	0.0102446	-0.00208971	0.0182951	0.0192215	2	0.00116663	0.00910286	0.00899013	0.0364628	0.0153245	2	0.00451368	-0.00449682	0.00324001	0.0195184	0.00902616	2	0.011545	-0.000827103	0.00536575	0.00409903	0.0187188	2	0.00728999	0.0078549	0.0085414	0.00665994	0.000692853
3	0.00207762	0.0103421	0.0155793	0.0212292	0.00337296	3	-0.00716352	0.010903	0.00271327	0.0207738	0.0196196	3	0.00465214	0.0075957	0.0136087	0.0470166	0.0164887	3	0.00244592	-0.00530731	0.00834282	0.0321543	0.00716192	3	0.0116608	-0.000879997	0.0053126	0.00887847	0.0247191	3	0.00765026	0.00544481	0.00920138	0.00644973	0.0064431
4	0.00449768	0.00971678	0.0203167	0.0278932	0.00477119	4	-0.00937444	0.0113061	0.00670718	0.0276222	0.0171722	4	0.00501065	0.00896737	0.0190235	0.059364	0.0164216	4	0.00368031	-0.00682953	0.00905372	0.0493713	0.00908999	4	0.0118637	-0.000398818	0.00473113	0.0120259	0.0349622	4	0.0059708	0.00778386	0.0100433	0.00727531	0.0124794
5	0.00335968	0.0126891	0.0248226	0.034993	0.00624594	5	-0.0086475	0.0119813	0.0105359	0.0291303	0.0180973	5	-0.000139085	0.00884507	0.0264006	0.0679325	0.0131555	5	0.00466783	-0.00654894	0.0144397	0.0638436	0.00661758	5	0.0110291	-0.000206661	0.00604051	0.0165994	0.0426556	5	0.00568101	0.00733918	0.0109085	0.00738414	0.018582
6	0.00203899	0.012141	0.0284568	0.0397733	0.0037723	6	-0.00894357	0.0115059	0.0131558	0.0324132	0.0151844	6	0.00382003	0.00704656	0.0284701	0.0739857	0.0145703	6	0.00241099	-0.00618644	0.020539	0.0732575	0.00600821	6	0.0098838	-0.00149786	0.00582017	0.0207172	0.0484814	6	0.00584324	0.00645085	0.0104029	0.00765205	0.0217701
7	0.00287108	0.0118372	0.0372538	0.0438193	0.00432468	7	-0.00763532	0.0139503	0.0212693	0.0390378	0.0139168	7	0.00526843	0.00729356	0.0411368	0.0831301	0.0135128	7	0.00607926	-0.00785198	0.0236561	0.0795267	0.0067368	7	0.00962278	0.000438342	0.00597852	0.0273931	0.0541279	7	0.00482942	0.00717364	0.0120241	0.00862262	0.0221255
8	0.00310285	0.0103129	0.0407246	0.0483073	0.00460349	8	-0.00855122	0.0114193	0.0235409	0.0393981	0.0151216	8	0.00047001	0.00650341	0.0458914	0.0912047	0.0154984	8	0.00327085	-0.00991493	0.031153	0.0932989	0.00524589	8	0.0101173	-0.000725836	0.00393909	0.0318062	0.0603348	8	0.00600365	0.0067775	0.0120107	0.00861042	0.0288932
9	0.00531933	0.0138428	0.047091	0.0524402	0.0044274	9	-0.00869805	0.0110341	0.0287473	0.0454398	0.0141241	9	0.00299152	0.00734152	0.0502739	0.0951173	0.0147322	9	0.000886358	-0.00878771	0.0359606	0.0989837	0.00626111	9	0.00988621	-0.000830788	0.00536307	0.0372663	0.0656212	9	0.00530357	0.00716472	0.0123351	0.00924133	0.0291039
10	0.0013468	0.0135045	0.0519971	0.0570739	0.00377964	10	-0.0080698	0.0139106	0.0364658	0.050621	0.0135212	10	0.00327329	0.00642428	0.0588857	0.102526	0.0145164	10	0.00203766	-0.00756054	0.0397995	0.107214	0.00578421	10	0.00940035	-0.00156178	0.0066182	0.0427541	0.0716364	10	0.0054106	0.00564668	0.0122808	0.00817636	0.0309799
11	0.00190222	0.0103818	0.0580294	0.0612414	0.00442635	11	-0.00858251	0.0137806	0.0387937	0.0545311	0.0135698	11	0.00363179	0.00604419	0.0659605	0.109335	0.0120009	11	0.000451609	-0.00875279	0.0432166	0.113458	0.00385132	11	0.00846207	-0.00207623	0.00513656	0.0466799	0.0764103	11	0.00503843	0.0056811	0.012148	0.0100747	0.0322595
12	0.00409155	0.0129449	0.0634184	0.0667708	0.0044295	12	-0.00889062	0.0131115	0.0467109	0.056543	0.0148089	12	0.000851294	0.00709572	0.072851	0.109917	0.013556	12	0.00246037	-0.0105821	0.0517896	0.11713	0.00517243	12	0.00949169	-0.000779567	0.00515809	0.0539729	0.0801478	12	0.00544893	0.00707157	0.0136317	0.00856508	0.0324329
13	0.00441937	0.0128635	0.0675576	0.0708335	0.006443	13	-0.0101086	0.0119789	0.0462321	0.0598547	0.0125711	13	0.00355505	0.00758012	0.0754036	0.114247	0.0102995	13	0.00253262	-0.00801456	0.0564032	0.123151	0.00663805	13	0.00898791	-0.0010522	0.00560928	0.056731	0.084613	13	0.00297534	0.00789961	0.0118069	0.0106665	0.033823
14	0.00127998	0.0121139	0.0705171	0.0734096	0.00615161	14	-0.0100003	0.0132896	0.0549285	0.061413	0.0123946	14	0.00295435	0.00510057	0.0839781	0.119801	0.0108018	14	0.00224239	-0.00888285	0.0586299	0.12991	0.00652605	14	0.00896853	-0.00215931	0.00550687	0.0613585	0.0882443	14	0.00310912	0.00680752	0.0124757	0.00814466	0.0365789
15	0.00298488	0.0144504	0.0755793	0.0761775	0.00494099	15	-0.00781464	0.0131091	0.0602389	0.0649198	0.0105679	15	0.00514733	0.00577082	0.0872655	0.126098	0.0112934	15	0.00390431	-0.00905145	0.0639737	0.136331	0.00792664	15	0.00868225	-0.000308485	0.00616934	0.0665973	0.0924762	15	0.0028834	0.00651676	0.0131986	0.00799964	0.0383944
16	0.00249627	0.0126181	0.0797258	0.0821333	0.00529946	16	-0.00870286	0.0111497	0.0607212	0.0712189	0.0100988	16	0.000309344	0.00522767	0.0936356	0.125445	0.0123833	16	0.0041825	-0.0102955	0.070126	0.139703	0.00467506	16	0.00811417	-0.000674696	0.00449078	0.070191	0.0976849	16	0.00373786	0.00700353	0.0128263	0.00950245	0.0367953
17	0.00397044	0.0135045	0.0864087	0.0817142	0.00573654	17	-0.0100244	0.0095297	0.067985	0.0734821	0.00895686	17	0.00341837	0.00801296	0.0986228	0.128693	0.0119913	17	0.0028337	-0.0103846	0.0759288	0.140558	0.00364539	17	0.00758251	-0.00107341	0.00421654	0.0767742	0.0985848	17	0.00366217	0.00777256	0.0128002	0.00924089	0.0365822
18	0.00244825	0.0109801	0.0933932	0.0835413	0.00442635	18	-0.0100424	0.0108885	0.0758387	0.0795274	0.0123579	18	0.00384521	0.00763407	0.107278	0.132604	0.0127083	18	0.00310466	-0.00755331	0.0780712	0.147207	0.00556623	18	0.00876469	-0.0014965	0.00477175	0.0824344	0.103425	18	0.00437852	0.00740825	0.0106739	0.00955605	0.037969
19	0.00204108	0.0136559	0.0925017	0.0867617	0.00337086	19	-0.011116	0.0136651	0.079093	0.0802886	0.0102291	19	0.003133	0.00590391	0.111706	0.134943	0.0139145	19	0.00128257	-0.00872388	0.0843801	0.149049	0.000893584	19	0.00710201	-0.00259744	0.00619904	0.0853249	0.105366	19	0.00601815	0.00738701	0.0129236	0.0067541	0.0379684
20	0.00350794	0.0131412	0.097589	0.0905478	0.00381004	20	-0.00904467	0.0115661	0.0848846	0.0860778	0.0105442	20	0.00208867	0.00561854	0.114158	0.136941	0.00991458	20	0.00279155	-0.00963794	0.088419	0.153884	0.00414397	20	0.00710321	-0.000915062	0.00502312	0.0902975	0.11017	20	0.00362154	0.00704955	0.0127213	0.00655723	0.0379236
21	0.00130921	0.0133834	0.0992977	0.0950076	0.00553215	21	-0.0108945	0.0119356	0.0905768	0.0849516	0.00777699	21	0.00214143	0.0068715	0.119849	0.139303	0.0110848	21	0.00214605	-0.00731005	0.0936097	0.153806	0.00614068	21	0.00763366	-0.00247976	0.00600298	0.0944947	0.111255	21	0.00248839	0.00729941	0.0115521	0.00442728	0.0371916
22	0.000502178	0.013255	0.103229	0.0939726	0.00377859	22	-0.00829245	0.0125903	0.0907396	0.0899844	0.00949823	22	0.00319415	0.00621805	0.126609	0.142334	0.0129637	22	0.00325159	-0.00897317	0.0987041	0.160256	0.00506886	22	0.00782734	-0.0015129	0.00562405	0.0975577	0.114738	22	0.00421011	0.00603006	0.0126459	0.00632336	0.0394704
23	0.00336908	0.0114342	0.106491	0.0976655	0.00473346	23	-0.00999668	0.0122088	0.0974324	0.0938646	0.0101427	23	0.00288961	0.0061593	0.130513	0.145463	0.0101028	23	0.00321546	-0.0085312	0.103286	0.161161	0.0044631	23	0.00736051	-0.00113738	0.00503727	0.102403	0.117564	23	0.0031915	0.00767276	0.011757	0.0045933	0.0378041
24	0.00134575	0.0136684	0.110251	0.101425	0.00377964	24	-0.00933834	0.012872	0.0999039	0.0939699	0.0107575	24	0.00147718	0.00317497	0.137654	0.147439	0.0119937	24	-0.00053591	-0.00636347	0.108048	0.162213	0.00483041	24	0.0078403	-0.00284283	0.00672564	0.106068	0.119203	24	0.00413557	0.00570341	0.0113425	0.00545033	0.0374339
25	0.00030068	0.0123362	0.109907	0.104347	0.00275559	25	-0.00848502	0.0110666	0.106578	0.098968	0.00687787	25	0.0043476	0.00646984	0.142266	0.146958	0.00850095	25	0.00310225	-0.00776406	0.104861	0.164525	0.00329976	25	0.00535854	-0.00169403	0.00521294	0.107115	0.122613	25	0.00278071	0.00604569	0.0112563	0.00256552	0.036396
26	0.00173204	0.013089	0.115311	0.108566	0.00330378	26	-0.0116528	0.0119994	0.106751	0.099181	0.00532839	26	0.00171578	0.00314739	0.144279	0.148574	0.0122574	26	0.00317331	-0.0078857	0.108265	0.164356	0.00176067	26	0.00566257	-0.00224914	0.00573422	0.110109	0.124034	26	0.00463295	0.0081756	0.0118078	0.004568	0.0352336
27	0.00142823	0.0130785	0.119503	0.108685	0.00159005	27	-0.00960432	0.0125879	0.113499	0.100651	0.00810394	27	0.00333564	0.0073607	0.148858	0.14736	0.0110812	27	0.0015716	-0.00652726	0.112552	0.170628	0.000862272	27	0.00540937	-0.0022015	0.00637974	0.115185	0.126655	27	0.00498979	0.00641143	0.0111805	0.00376978	0.0382932
28	0.000502178	0.0142531	0.118794	0.110429	0.00322307	28	-0.0101868	0.01331	0.113236	0.103523	0.00724984	28	0.00247835	0.00329127	0.15359	0.150306	0.0123114	28	0.00222071	-0.00652365	0.117209	0.170662	0.00244712	28	0.00630786	-0.00248798	0.00701316	0.116413	0.128204	28	0.0045222	0.00672255	0.0117327	0.00286347	0.0369307
29	0.00015556	0.0121473	0.120953	0.115029	0.00209002	29	-0.00971264	0.0135508	0.118891	0.10398	0.00596927	29	0.00333923	0.00559456	0.156344	0.149517	0.00883788	29	0.00246157	-0.00948379	0.118141	0.171651	0.00089238	29	0.00444739	-0.00236517	0.00540475	0.119328	0.13022	29	0.00364178	0.00646672	0.0129129	0.00145647	0.0363029
30	-0.00116409	0.0134534	0.12317	0.11955	0.00185838	30	-0.0101724	0.0122702	0.121589	0.105423	0.00533905	30	0.00425168	0.00405984	0.163759	0.149769	0.00890862	30	0.00308299	-0.00885034	0.123582	0.173685	-0.000531092	30	0.00389374	-0.00275117	0.0056244	0.12278	0.132886	30	0.00412148	0.00676871	0.0125494	0.00105236	0.036032
31	-0.00066087	0.0132665	0.124775	0.118241	-6.07929e-05	31	-0.0108596	0.0135243	0.122375	0.111747	0.00532958	31	-0.00150595	0.00249034	0.165407	0.151378	0.0122886	31	0.00405003	-0.0101678	0.121818	0.174492	0.00244953	31	0.00500173	-0.00249015	0.00554097	0.122989	0.134827	31	0.00533382	0.0076213	0.0136048	0.00157136	0.0345044
32	-0.000931274	0.0142687	0.125459	0.122715	0.000515691	32	-0.00988234	0.0130344	0.126885	0.113312	0.00512938	32	0.0025311	0.00212944	0.167171	0.15402	0.00912084	32	0.00200755	-0.00968009	0.126309	0.17148	0.00237486	32	0.00428519	-0.00293535	0.00587436	0.126217	0.135836	32	0.00373964	0.00619311	0.0134847	0.000717101	0.0312245
33	-0.00265079	0.0148805	0.125491	0.128538	-0.00137518	33	-0.0133847	0.0133016	0.12874	0.114395	0.00469936	33	-0.00161506	0.00442313	0.16707	0.154001	0.0110201	33	0.00269159	-0.00704029	0.127393	0.174572	-0.00110313	33	0.00331028	-0.00444796	0.00704729	0.127208	0.139168	33	0.00585383	0.00818742	0.0122257	0.00163249	0.0314649
34	-0.00297026	0.0134659	0.125725	0.127696	0.000854245	34	-0.0134304	0.0124146	0.130323	0.111948	0.00455366	34	-0.00266299	0.00508259	0.168519	0.153503	0.00894339	34	0.000753886	-0.00905386	0.130831	0.169855	0.000505802	34	0.00371427	-0.00521559	0.00560888	0.12896	0.1365	34	0.00393795	0.00735389	0.0127092	0.00281262	0.0299409
35	-0.00549264	0.0132258	0.125899	0.126791	-0.00276188	35	-0.0127624	0.0140767	0.131782	0.111351	0.0031025	35	-0.00299991	0.00121939	0.168974	0.154075	0.00862925	35	0.001515	-0.00898762	0.130843	0.177033	-0.000955003	35	0.00200372	-0.00558002	0.00610495	0.129508	0.138391	35	0.00505206	0.00713912	0.0130775	0.00316048	0.0343436
36	-0.00461565	0.0124198	0.129647	0.13431	-0.00330692	36	-0.0128744	0.0125458	0.135144	0.113039	0.00303853	36	-0.00290399	0.00393754	0.175971	0.152323	0.00874315	36	0.00264462	-0.00892259	0.130492	0.172691	0.000391395	36	0.00221654	-0.00494846	0.00534766	0.131761	0.140013	36	0.00506992	0.00776484	0.0123586	0.00296027	0.0302319
37	-0.00440476	0.0127048	0.12624	0.13254	-0.0034914	37	-0.0119091	0.0137614	0.136714	0.116034	0.000498722	37	-0.00365217	0.0060346	0.179292	0.148489	0.0110596	37	0.000417889	-0.0111698	0.132802	0.173394	-0.00343705	37	0.00115748	-0.00529866	0.00509879	0.131919	0.140656	37	0.00686072	0.00621193	0.0140989	0.00529295	0.0295289
38	-0.00595723	0.0136037	0.125204	0.135809	-0.00496825	38	-0.0109559	0.0105286	0.138112	0.11299	0.00369363	38	-0.00378047	-0.000661851	0.178393	0.148221	0.00979348	38	0.000162579	-0.00985592	0.133606	0.172745	-0.00338406	38	0.0012837	-0.00558352	0.00475881	0.132307	0.140515	38	0.00680928	0.00556866	0.0127498	0.00655163	0.030154
39	-0.00782291	0.0144692	0.129423	0.124616	-0.00615266	39	-0.0117731	0.0147724	0.13826	0.113017	0.00262155	39	-0.00490513	0.000599503	0.177706	0.150002	0.00896737	39	-0.000496168	-0.00897438	0.13292	0.173371	-0.00213762	39	0.000824661	-0.0066974	0.00675573	0.133534	0.137001	39	0.00650617	0.0057221	0.0136235	0.00444998	0.0320269
40	-0.00868006	0.0150455	0.128168	0.140884	-0.00625119	40	-0.013168	0.0151479	0.137218	0.110393	0.00193447	40	-0.00547226	0.000268577	0.176352	0.15026	0.00866042	40	0.000219181	-0.0119165	0.133729	0.171725	-0.00333227	40	0.000252859	-0.00720963	0.0060923	0.133038	0.141001	40	0.00654906	0.00681366	0.0155961	0.00456428	0.0306663

## Sheet: Figure5B_withSec18_Sec17 w.t. 
	Replicate 1						Replicate 2						Replicate 3						Replicate 4						Average						Stdev
	100nM	500nM	1000nM	2000nM	0nM		100nM	500nM	1000nM	2000nM	0nM		100nM	500nM	1000nM	2000nM	0nM		100nM	500nM	1000nM	2000nM	0nM		100nM	500nM	1000nM	2000nM	0nM		100nM	500nM	1000nM	2000nM	0nM
Time (min)	w.t.	w.t.	w.t.	w.t.	Buffer	Time (min)	w.t.	w.t.	w.t.	w.t.	Buffer	Time (min)	w.t.	w.t.	w.t.	w.t.	Buffer	Time (min)	w.t.	w.t.	w.t.	w.t.	Buffer	Time (min)	w.t.	w.t.	w.t.	w.t.	Buffer	Time (min)	w.t.	w.t.	w.t.	w.t.	Buffer
0	0.00431105	0.0104857	0.0255124	0.0272336	0.00135306	0	0.00439456	0.0773344	0.00584098	0.0304987	0.018044	0	0.00617868	0.0411491	0.00557658	0.0103558	0.0179689	0	0.0122036	0.0187726	0.0174753	0.0159144	0.0203057	0	0.0144179	0.00696973	0.0355309	0.0162762	0.0245489	0	0.00877715	0.00453285	0.0364392	0.00989039	0.00765384
1	0.00609711	0.0756148	0.140071	0.086416	0.00721528	1	-0.00202099	0.106763	0.118328	0.0981479	0.0172539	1	0.00937616	0.11435	0.00366057	0.0112203	0.0221216	1	0.0112079	0.0925916	0.137795	0.0996037	0.0197731	1	0.016591	0.00509468	0.0916563	0.132064	0.0947225	1	0.00655889	0.00667118	0.0155949	0.0119506	0.00723039
2	0.00757081	0.142306	0.203638	0.127186	0.00713385	2	0.00545585	0.149962	0.198883	0.152687	0.0157494	2	0.0240202	0.19915	0.00116663	0.00910286	0.0208455	2	0.0154905	0.178539	0.220646	0.160817	0.0186659	2	0.0155987	0.00950572	0.156936	0.207722	0.146897	2	0.00601701	0.00528976	0.0190965	0.0114419	0.0175474
3	0.0108012	0.189185	0.254241	0.155515	0.00959776	3	0.0216883	0.207871	0.258611	0.193501	0.0152922	3	0.0408271	0.267797	0.00465214	0.0075957	0.0201041	3	0.0255144	0.240771	0.277586	0.197677	0.0156237	3	0.0151544	0.0193347	0.212609	0.263479	0.182231	3	0.00430563	0.00763377	0.0261169	0.0124109	0.0232309
4	0.0169172	0.227158	0.291751	0.178004	0.00615455	4	0.0390741	0.261719	0.298709	0.232782	0.0173119	4	0.061061	0.32377	0.00501065	0.00896737	0.0190611	4	0.036684	0.293043	0.318352	0.230815	0.0162463	4	0.0146935	0.0308918	0.26064	0.302937	0.213867	4	0.00580968	0.0121612	0.032956	0.0137953	0.0310738
5	0.0242962	0.262614	0.326056	0.201637	0.00854538	5	0.0544378	0.302191	0.337816	0.262292	0.0165964	5	0.084317	0.362624	-0.000139085	0.00884507	0.0170568	5	0.047544	0.333097	0.36064	0.252499	0.013468	5	0.0139167	0.0420926	0.2993	0.341504	0.238809	5	0.00391978	0.0157929	0.0353304	0.0175841	0.0325624
6	0.0257311	0.295423	0.351366	0.217144	0.00723616	6	0.0735482	0.339367	0.367866	0.289465	0.0140507	6	0.101162	0.401354	0.00382003	0.00704656	0.0183065	6	0.0594057	0.370759	0.392797	0.274938	0.0150503	6	0.0136609	0.052895	0.335183	0.370676	0.260516	6	0.00465265	0.0245644	0.0378417	0.0208579	0.0382567
7	0.0308136	0.317824	0.377189	0.236249	0.00755355	7	0.0887385	0.375663	0.401102	0.312503	0.016138	7	0.120024	0.437679	0.00526843	0.00729356	0.0173825	7	0.0666405	0.40428	0.425258	0.29907	0.0148247	7	0.0139747	0.0620642	0.365923	0.401183	0.282607	7	0.00440631	0.0292323	0.0440435	0.0240347	0.0407058
8	0.0358238	0.343155	0.393192	0.249998	0.00737711	8	0.107084	0.409892	0.420103	0.338492	0.0131824	8	0.140956	0.474339	0.00047001	0.00650341	0.0165233	8	0.0800089	0.434167	0.444909	0.314115	0.0131141	8	0.0125492	0.0743056	0.395738	0.419401	0.300868	8	0.00379756	0.0359708	0.0471283	0.0258656	0.0457099
9	0.0394766	0.363714	0.415433	0.264558	0.00589876	9	0.120271	0.436912	0.440943	0.355137	0.0155729	9	0.151582	0.49812	0.00299152	0.00734152	0.0174414	9	0.0905295	0.461064	0.466328	0.337088	0.0143017	9	0.0133037	0.0834258	0.420564	0.440901	0.318928	9	0.00510225	0.0408631	0.0506921	0.0254478	0.0479424
10	0.0469468	0.379879	0.421829	0.27722	0.00749508	10	0.133818	0.468413	0.458131	0.371353	0.014489	10	0.167372	0.523303	0.00327329	0.00642428	0.0176468	10	0.101362	0.478181	0.484596	0.347576	0.0147264	10	0.0135893	0.0940423	0.442158	0.454852	0.33205	10	0.00430912	0.0438958	0.0541555	0.0315117	0.0489495
11	0.0506143	0.391918	0.435367	0.291473	0.00711401	11	0.148534	0.488532	0.472755	0.387473	0.0139263	11	0.179936	0.536536	0.00363179	0.00604419	0.0172046	11	0.110379	0.490665	0.497524	0.368339	0.0115654	11	0.0124526	0.103176	0.457038	0.468549	0.349095	11	0.00424427	0.0493558	0.056406	0.0312909	0.0508109
12	0.0573277	0.402325	0.443155	0.305775	0.0076924	12	0.157921	0.510268	0.477039	0.405987	0.0147141	12	0.195346	0.554695	0.000851294	0.00709572	0.0144482	12	0.115934	0.506198	0.509809	0.37531	0.0142753	12	0.0127825	0.110394	0.47293	0.476668	0.362357	12	0.00339819	0.0505248	0.0611797	0.0333288	0.0513462
13	0.0620926	0.409588	0.446193	0.318126	0.00767988	13	0.170475	0.524541	0.488175	0.422457	0.0124491	13	0.202629	0.565021	0.00355505	0.00758012	0.0128632	13	0.126807	0.514801	0.51548	0.39492	0.0122528	13	0.0113112	0.119791	0.482977	0.483283	0.378501	13	0.00243425	0.0545305	0.0637428	0.0349018	0.0540688
14	0.0632435	0.417364	0.456317	0.327318	0.0104413	14	0.178081	0.541857	0.490838	0.434082	0.01241	14	0.217457	0.5754	0.00295435	0.00510057	0.0128356	14	0.132417	0.524189	0.519228	0.404638	0.0125395	14	0.0120566	0.12458	0.49447	0.488794	0.388679	14	0.00109148	0.0578182	0.0673576	0.0315048	0.0551424
15	0.0690261	0.421758	0.457258	0.339095	0.00859444	15	0.189001	0.54983	0.500156	0.447669	0.0113841	15	0.223335	0.580456	0.00514733	0.00577082	0.012683	15	0.14255	0.528808	0.527945	0.414117	0.0137571	15	0.0116047	0.133526	0.500132	0.49512	0.400294	15	0.00222903	0.0604942	0.0686829	0.0356118	0.0555915
16	0.0733372	0.427568	0.464697	0.348135	0.00517943	16	0.198114	0.559511	0.504785	0.457821	0.0104388	16	0.235962	0.590827	0.000309344	0.00522767	0.0165366	16	0.147427	0.53557	0.532708	0.424527	0.013354	16	0.0113772	0.139626	0.50755	0.50073	0.410161	16	0.00482423	0.0627529	0.0702928	0.0341863	0.0562365
17	0.0756253	0.436853	0.465289	0.357543	0.00686345	17	0.205323	0.569846	0.505053	0.472497	0.0128768	17	0.246614	0.599525	0.00341837	0.00801296	0.0151403	17	0.15253	0.540067	0.538239	0.434529	0.0124687	17	0.0118373	0.144493	0.515589	0.50286	0.421523	17	0.00351796	0.0652212	0.0697937	0.0365242	0.05857
18	0.0800433	0.438861	0.470844	0.363991	0.00831256	18	0.213333	0.580763	0.509758	0.482412	0.0112088	18	0.252099	0.606832	0.00384521	0.00763407	0.0153926	18	0.158703	0.54	0.542002	0.442025	0.0115666	18	0.0116201	0.150693	0.519875	0.507535	0.429476	18	0.00290653	0.0670047	0.0730604	0.0356313	0.0601993
19	0.0824739	0.432633	0.470581	0.373734	0.00769032	19	0.223845	0.584827	0.510553	0.491045	0.0126173	19	0.267365	0.613028	0.003133	0.00590391	0.0159141	19	0.161072	0.548765	0.539441	0.453372	0.0147911	19	0.0127532	0.155797	0.522075	0.506858	0.439384	19	0.00364215	0.0708331	0.0795303	0.0345783	0.0598935
20	0.0837548	0.441323	0.468378	0.379431	0.00625164	20	0.231385	0.590443	0.517024	0.500334	0.0102315	20	0.267107	0.611731	0.00208867	0.00561854	0.0167889	20	0.166551	0.553803	0.550381	0.455501	0.0133156	20	0.0116469	0.160564	0.528523	0.511928	0.445088	20	0.00448467	0.0739971	0.077708	0.0412383	0.0611201
21	0.0884652	0.443315	0.471174	0.390383	0.0046334	21	0.237715	0.598437	0.513878	0.505445	0.0088692	21	0.27763	0.616303	0.00214143	0.0068715	0.016396	21	0.176012	0.548877	0.55049	0.454653	0.0158156	21	0.0114285	0.167397	0.53021	0.511847	0.450161	21	0.00567585	0.0749968	0.0792275	0.0396969	0.0576623
22	0.0903382	0.440422	0.466729	0.395183	0.00830629	22	0.244122	0.598323	0.513834	0.514948	0.0117514	22	0.283728	0.616864	0.00319415	0.00621805	0.0153241	22	0.177959	0.549213	0.546392	0.467157	0.0145404	22	0.0124806	0.170806	0.52932	0.508985	0.459096	22	0.00317727	0.077141	0.0808082	0.0400526	0.0602881
23	0.0903026	0.440457	0.468793	0.398737	0.00652936	23	0.2474	0.601555	0.514776	0.523713	0.00908006	23	0.289751	0.615266	0.00288961	0.0061593	0.0155909	23	0.185638	0.558521	0.547453	0.46847	0.013907	23	0.0112768	0.174447	0.533511	0.51034	0.46364	23	0.00419894	0.0791445	0.0834101	0.0395171	0.0626279
24	0.0932877	0.442174	0.468652	0.403681	0.00742931	24	0.255046	0.615538	0.516005	0.528312	0.00936319	24	0.292758	0.621901	0.00147718	0.00317497	0.0165666	24	0.184842	0.564304	0.548535	0.477311	0.0136143	24	0.0117434	0.177725	0.540672	0.511064	0.469768	24	0.00412474	0.0811135	0.0890653	0.0401701	0.0626569
25	0.0933538	0.444972	0.470728	0.409089	0.00806095	25	0.259694	0.633848	0.51316	0.534963	0.00977662	25	0.299923	0.620123	0.0043476	0.00646984	0.014775	25	0.187771	0.558627	0.546021	0.477045	0.0129557	25	0.0113921	0.180273	0.545816	0.509969	0.473699	25	0.00303289	0.083423	0.095087	0.0377477	0.0630034
26	0.0901202	0.443034	0.465574	0.409105	0.00892749	26	0.261793	0.619586	0.508979	0.539335	0.00806959	26	0.300875	0.618006	0.00171578	0.00314739	0.0169127	26	0.19472	0.554091	0.541304	0.479761	0.0126942	26	0.011651	0.182211	0.538904	0.505286	0.476067	26	0.00404217	0.0865175	0.0892501	0.0380001	0.0651935
27	0.0976344	0.447506	0.463681	0.408382	0.00483699	27	0.266189	0.632674	0.509947	0.544293	0.0075223	27	0.303349	0.626221	0.00333564	0.0073607	0.0157988	27	0.196639	0.547307	0.535125	0.479354	0.0112871	27	0.00986129	0.186821	0.542496	0.502918	0.477343	27	0.00476099	0.0847052	0.0926777	0.0362371	0.0679781
28	0.0946818	0.447255	0.465205	0.402401	0.00768614	28	0.277041	0.648012	0.506741	0.547825	0.00867611	28	0.30245	0.623473	0.00247835	0.00329127	0.0158072	28	0.197935	0.543048	0.536723	0.464271	0.0118041	28	0.0109934	0.189886	0.546105	0.50289	0.471499	28	0.00365775	0.0914457	0.100413	0.0359144	0.0729808
29	0.0958872	0.449295	0.464791	0.403824	0.00445069	29	0.275677	0.669545	0.506839	0.559732	0.00552148	29	0.301396	0.618801	0.00333923	0.00559456	0.01878	29	0.204421	0.547955	0.537024	0.454733	0.0105397	29	0.00982297	0.191995	0.555598	0.502885	0.472763	29	0.00653466	0.090537	0.110324	0.0362785	0.079502
30	0.0962854	0.450012	0.464702	0.401736	0.00411556	30	0.278998	0.695346	0.503224	0.560912	0.00695487	30	0.309775	0.599014	0.00425168	0.00405984	0.0137536	30	0.203731	0.553309	0.538965	0.446761	0.0130373	30	0.00946534	0.193005	0.566222	0.502297	0.469803	30	0.00469294	0.0918271	0.123176	0.0371405	0.0820511
31	0.0971879	0.447956	0.460666	0.405964	0.00350898	31	0.28077	0.698211	0.5053	0.567146	0.00903623	31	0.311606	0.600408	-0.00150595	0.00249034	0.0134941	31	0.206118	0.555202	0.542319	0.44647	0.011557	31	0.00939907	0.194692	0.567123	0.502762	0.473193	31	0.00433015	0.0923228	0.125553	0.0408859	0.0838478
32	0.0918077	0.454533	0.464901	0.404825	0.00406023	32	0.283483	0.733431	0.500683	0.579248	0.00827097	32	0.314271	0.600414	0.0025311	0.00212944	0.0118539	32	0.209685	0.552715	0.527749	0.45108	0.010217	32	0.00860053	0.194992	0.580226	0.497778	0.478384	32	0.00336256	0.0966787	0.14147	0.0315248	0.0903602
33	0.0964007	0.460042	0.465653	0.399565	0.00325006	33	0.286556	0.770271	0.505307	0.573697	0.00567075	33	0.312929	0.61445	-0.00161506	0.00442313	0.0135962	33	0.213731	0.55959	0.538539	0.446881	0.0121676	33	0.00867116	0.198896	0.596634	0.503166	0.473381	33	0.00499573	0.0959416	0.158398	0.03649	0.0900399
34	0.0938003	0.476789	0.465667	0.394123	0.00177485	34	0.286608	0.749319	0.499355	0.586844	0.00601428	34	0.310828	0.62228	-0.00266299	0.00508259	0.0154443	34	0.214186	0.559869	0.551808	0.437876	0.0102374	34	0.00836772	0.198198	0.595326	0.50561	0.472948	34	0.00584746	0.0973932	0.139682	0.04341	0.101034
35	0.0949113	0.495001	0.465143	0.393776	0.00245869	35	0.287984	0.79589	0.499754	0.602396	0.00810513	35	0.31185	0.607872	-0.00299991	0.00121939	0.0124066	35	0.212008	0.559289	0.538383	0.450963	0.00923217	35	0.00805065	0.198301	0.616727	0.501093	0.482378	35	0.00414903	0.0972633	0.158455	0.0366388	0.1078
36	0.0929796	0.493932	0.473709	0.386322	0.000990783	36	0.291395	0.84486	0.493261	0.629202	0.00500499	36	0.307834	0.62524	-0.00290399	0.00393754	0.0117481	36	0.216828	0.558943	0.554945	0.440895	0.00993514	36	0.00691976	0.200401	0.632578	0.507305	0.485473	36	0.00487254	0.100222	0.186693	0.0424	0.127429
37	0.0920121	0.494941	0.478901	0.385304	-0.00072038	37	0.288287	0.950503	0.493073	0.643811	0.0030101	37	0.308685	0.606778	-0.00365217	0.0060346	0.0125965	37	0.214593	0.546328	0.55332	0.444542	0.0137715	37	0.00716442	0.198297	0.663924	0.508431	0.491219	37	0.00713183	0.0991471	0.249511	0.0395152	0.135427
38	0.0938695	0.495355	0.492275	0.407974	-0.000207762	38	0.2913	0.887386	0.485075	0.673817	0.00388553	38	0.302651	0.602703	-0.00378047	-0.000661851	0.0110344	38	0.220456	0.541506	0.547451	0.454448	0.0101175	38	0.00620741	0.201875	0.641416	0.508267	0.51208	38	0.00532709	0.100018	0.214263	0.0341251	0.141983
39	0.0907533	0.507448	0.501671	0.415436	-0.00051053	39	0.290956	0.838102	0.485185	0.712326	0.00552622	39	0.30108	0.61796	-0.00490513	0.000599503	0.0163467	39	0.221032	0.530069	0.564935	0.452281	0.00769547	39	0.00726447	0.200914	0.625206	0.517264	0.526681	39	0.00697961	0.101606	0.18472	0.0420996	0.161825
40	0.0898079	0.522736	0.502002	0.434156	0.00034975	40	0.287071	0.794307	0.491021	0.70615	0.00390804	40	0.304079	0.641351	-0.00547226	0.000268577	0.0145431	40	0.220202	0.540614	0.620269	0.441435	0.00802057	40	0.00670536	0.199027	0.619219	0.537764	0.527247	40	0.00609312	0.100322	0.151894	0.0716621	0.154978

## Sheet: Figure5C_without 18_Sec17 FSMS
	Replicate 1							Replicate 2						Replicate 3						Replicate 4						Average						Stdev
	100nM	500nM	1000nM	2000nM	0nM			100nM	500nM	1000nM	2000nM	0nM		100nM	500nM	1000nM	2000nM	0nM		100nM	500nM	1000nM	2000nM	0nM		100nM	500nM	1000nM	2000nM	0nM		100nM	500nM	1000nM	2000nM	0nM
Time (min)	FSMS	FSMS	FSMS	FSMS	Buffer	Time (min)	Time (min)	FSMS	FSMS	FSMS	FSMS	Buffer	Time (min)	FSMS	FSMS	FSMS	FSMS	Buffer	Time (min)	FSMS	FSMS	FSMS	FSMS	Buffer	Time (min)	FSMS	FSMS	FSMS	FSMS	Buffer	Time (min)	w.t.	w.t.	w.t.	w.t.	Buffer
0	0.00195964	0.0146853	0	0.0068997	0	0	0	0	0.0136374	0.0162617	0.00781905	0.0190178	0	0.00762448	0.0361728	0.0108308	0	0.018388	0	0.0182896	0	0.00839222	0	0.0182017	0	0.0139019	0.00674974	0.00944091	0.00821796	0.00490625	0	0.00927448	0.0100417	0.00819284	0.00813224	0.00427373
1	0.00834597	0.0165917	0.00342471	0.00746123	0.00278075	1	1	-0.00452534	0.0122774	-2.87245e-05	0.00892375	0.0165846	1	0.00477684	0.0175307	0.00699767	0.00357774	0.015159	1	0.01528	-0.0056963	0.00516065	-0.00701983	0.0150536	1	0.0123945	0.00636689	0.00772427	0.00285221	0.00312172	1	0.00644709	0.0100499	0.011821	0.00264163	0.00881323
2	0.00670893	0.0182632	0.00352319	0.00704008	0.00260781	2	2	-0.00293666	0.0120078	0.00252177	0.00736904	0.0192215	2	0.00594108	0.0160199	0.00164793	0.00108416	0.0153245	2	0.0158906	-0.000759908	0.00517992	-0.00818257	0.00902616	2	0.011545	0.0065543	0.00983703	0.00374163	0.00207552	2	0.00728999	0.00941459	0.00969556	0.00134247	0.00888529
3	0.00631115	0.0170365	0.00354623	0.00696256	0.00337296	3	3	-0.00352279	0.0133835	0.000147213	0.0117902	0.0196196	3	0.00244238	0.0176722	0.00511123	0.000693865	0.0164887	3	0.0114926	-0.00479187	0.00202546	-0.00687524	0.00716192	3	0.0116608	0.00476031	0.00854268	0.0019063	0.00395918	3	0.00765026	0.00762686	0.0116916	0.00170264	0.0096884
4	0.00791165	0.020321	0.0053534	0.0066996	0.00477119	4	4	-0.0060358	0.0144895	0.00185034	0.00919663	0.0171722	4	0.00408501	0.0165127	0.0042704	0.00249358	0.0164216	4	0.0107182	-0.00413433	0.00267491	-0.0101128	0.00908999	4	0.0118637	0.00419801	0.0102254	0.00329288	0.0019278	4	0.0059708	0.00897315	0.0127731	0.00183147	0.010502
5	0.00952676	0.0186933	0.00355566	0.00599036	0.00624594	5	5	-0.00737655	0.0126469	0.00160498	0.00835405	0.0180973	5	0.00691587	0.0169851	0.0052871	0.003385	0.0131555	5	0.0089527	-0.00326965	0.00156518	-0.0112671	0.00661758	5	0.0110291	0.00370097	0.00935686	0.00224194	0.00102575	5	0.00568101	0.00959771	0.0113451	0.00113789	0.0107114
6	0.00749717	0.018258	0.00467977	0.0063717	0.0037723	6	6	-0.0069505	0.0147688	0.00248587	0.00931991	0.0151844	6	0.00439676	0.0156662	0.00254658	0.00100707	0.0145703	6	0.0088684	-0.0044908	0.00090489	-0.0115575	0.00600821	6	0.0098838	0.00313836	0.00951197	0.00269018	0.00137802	6	0.00584324	0.00876406	0.0122516	0.00189572	0.0112991
7	0.0046762	0.0189523	0.00371385	0.0066797	0.00432468	7	7	-0.00579509	0.01762	0.000187906	0.00904104	0.0139168	7	0.00358743	0.0187069	0.00355003	0.00151783	0.0135128	7	0.0120429	-0.00332866	0.00283878	-0.0123745	0.0067368	7	0.00962278	0.00364134	0.0110812	0.00224685	0.00111543	7	0.00482942	0.00896391	0.0124971	0.00183599	0.0117421
8	0.00726748	0.0189282	0.00317118	0.00618836	0.00460349	8	8	-0.00480216	0.0127239	0.00158344	0.00941686	0.0151216	8	0.00215342	0.0156542	0.00486067	0.00145037	0.0154984	8	0.0131003	-0.00358397	0.00334364	-0.0124865	0.00524589	8	0.0101173	0.00518853	0.00935606	0.00269942	0.00103957	8	0.00600365	0.00913049	0.0116278	0.000970305	0.0118246
9	0.00723094	0.0190754	0.00447967	0.00627322	0.0044274	9	9	-0.00520776	0.0132114	0.00158942	0.0108315	0.0141241	9	0.00338719	0.0166014	0.00617853	-3.13203e-05	0.0147322	9	0.0101365	-0.00561561	0.00262792	-0.0119853	0.00626111	9	0.00988621	0.00405324	0.0088904	0.002899	0.00170649	9	0.00530357	0.00815077	0.0129002	0.00146407	0.0120745
10	0.00811732	0.0194711	0.00138183	0.00392233	0.00377964	10	10	-0.00466616	0.0135917	0.0041483	0.0105826	0.0135212	10	0.00448668	0.0144133	0.00219724	-0.000290315	0.0145164	10	0.00867812	-0.0067922	0.00278697	-0.00886334	0.00578421	10	0.00940035	0.0040431	0.00875687	0.00277236	0.00188053	10	0.0054106	0.00754765	0.013783	0.00138329	0.00988245
11	0.00582986	0.0180607	0.00568864	0.00690704	0.00442635	11	11	-0.00288731	0.0151238	0.000604412	0.0105156	0.0135698	11	0.00362819	0.0162945	0.00407886	0.000303566	0.0120009	11	0.00993058	-0.00591427	0.000890431	-0.0118539	0.00385132	11	0.00846207	0.00429104	0.00909006	0.00239449	0.00185622	11	0.00503843	0.00654604	0.0130768	0.0028564	0.0120097
12	0.00975958	0.0197113	0.0045771	0.00888496	0.0044295	12	12	-0.00554595	0.0152321	0.00258042	0.00974599	0.0148089	12	0.00317377	0.0160931	0.0050763	0.000239721	0.013556	12	0.00755211	-0.00751357	0.00379186	-0.0109033	0.00517243	12	0.00949169	0.00392191	0.00914327	0.0036498	0.0025759	12	0.00544893	0.00827337	0.0145981	0.00100589	0.0116812
13	0.00763289	0.018163	0.00254784	0.00727266	0.006443	13	13	-0.0060707	0.0151406	0.000885673	0.0113175	0.0125711	13	0.00734152	0.0173472	-3.01157e-05	-0.00124558	0.0102995	13	0.00852999	-0.0067356	0.00118564	-0.0126841	0.00663805	13	0.00898791	0.00336406	0.00885601	0.00153972	0.00196867	13	0.00297534	0.00818305	0.013587	0.00088585	0.0128498
14	0.00770076	0.0188886	0.00557235	0.00636855	0.00615161	14	14	-0.00650639	0.0140093	0.00253733	0.00888904	0.0123946	14	0.00624083	0.0141938	0.00390901	0.000970929	0.0108018	14	0.0107736	-0.00669465	0.00286408	-0.0124925	0.00652605	14	0.00896853	0.00398932	0.00873441	0.00365792	0.000921684	14	0.00310912	0.00921848	0.0135828	0.00166598	0.0116852
15	0.00696263	0.0194576	0.00525492	0.00592121	0.00494099	15	15	-0.00358056	0.0117226	0.0035379	0.0114659	0.0105679	15	0.0051893	0.0129685	0.00327538	-0.000374639	0.0112934	15	0.00869257	-0.00390913	-0.00105189	-0.0118166	0.00792664	15	0.00868225	0.00402488	0.00909033	0.00258031	0.00185683	15	0.0028834	0.00664306	0.0119037	0.00326063	0.0121617
16	0.00933571	0.0190441	0.00323613	0.00696466	0.00529946	16	16	-0.00692402	0.0143283	0.0015619	0.00803928	0.0100988	16	0.0037457	0.0146902	0.00402586	-0.000916721	0.0123833	16	0.00708244	-0.00555539	0.00360872	-0.0106551	0.00467506	16	0.00811417	0.00316471	0.00927233	0.00280225	0.00144963	16	0.00373786	0.00880943	0.0130559	0.00109021	0.0104967
17	0.00730403	0.0197603	0.00480968	0.00570435	0.00573654	17	17	-0.00623438	0.0153344	0.00347447	0.0099339	0.00895686	17	0.00493271	0.0144516	0.00431979	-0.000763733	0.0119913	17	0.00754729	-0.00473286	0.00222307	-0.00879105	0.00364539	17	0.00758251	0.00287231	0.0101206	0.0035024	0.0022824	17	0.00366217	0.00788757	0.0130525	0.00129353	0.0098203
18	0.00645627	0.0186255	0.00546864	0.0071438	0.00442635	18	18	-0.00419196	0.0143042	0.00190539	0.00773527	0.0123579	18	0.00477085	0.0149492	0.00461854	-0.00174189	0.0127083	18	0.00642489	-0.00657904	0.00279901	-0.0107418	0.00556623	18	0.00876469	0.0028964	0.00878354	0.00339101	0.00137909	18	0.00437852	0.00613872	0.0134787	0.00185392	0.0105012
19	0.0071328	0.0179312	0.00599979	0.00714904	0.00337086	19	19	-0.00613088	0.013434	0.00409923	0.0107944	0.0102291	19	0.00457421	0.0140895	0.0021081	-0.0016925	0.0139145	19	0.00836621	-0.00319739	0.000944652	-0.0111334	0.000893584	19	0.00710201	0.00312271	0.00938927	0.00368122	0.00227002	19	0.00601815	0.00803754	0.0111299	0.00255336	0.0117499
20	0.00800457	0.0188322	0.00467034	0.00634341	0.00381004	20	20	-0.00517526	0.0112387	0.00283415	0.00944079	0.0105442	20	0.005314	0.0129121	0.00403429	-0.00296218	0.00991458	20	0.00685483	-0.00653569	0.00180496	-0.0114515	0.00414397	20	0.00710321	0.00322804	0.00784508	0.00310315	0.00144423	20	0.00362154	0.00730015	0.01302	0.00145151	0.0112749
21	0.0106199	0.0182653	0.00583112	0.00641151	0.00553215	21	21	-0.00713344	0.0139287	0.00441999	0.0072673	0.00777699	21	0.00546507	0.0135008	0.00268993	-0.00473539	0.0110848	21	0.00649474	-0.00902375	0.00304361	-0.0117853	0.00614068	21	0.00763366	0.00332706	0.0077234	0.00443157	0.000631183	21	0.00248839	0.00929089	0.0146646	0.00139379	0.0107615
22	0.00928768	0.0193448	0.00566664	0.00738476	0.00377859	22	22	-0.00470467	0.0128647	0.00689987	0.008907	0.00949823	22	0.00635953	0.0120021	0.00185512	-0.00228999	0.0129637	22	0.00809886	-0.00681267	0.00357618	-0.0120515	0.00506886	22	0.00782734	0.00422729	0.00846562	0.0053809	0.0014134	22	0.00421011	0.00775811	0.0136223	0.00168017	0.0116858
23	0.0065659	0.0185722	0.0041151	0.00476568	0.00473346	23	23	-0.00381645	0.0107537	0.00335359	0.0104809	0.0101427	23	0.00230569	0.0145368	0.0026032	-0.00370423	0.0101028	23	0.00910444	-0.00963915	0.00405333	-0.0120805	0.0044631	23	0.00736051	0.00395129	0.00656226	0.00384067	0.00105536	23	0.0031915	0.00684576	0.0145653	0.000422956	0.0117294
24	0.00885858	0.0204066	0.00392548	0.00516168	0.00377964	24	24	-0.00432676	0.0127721	0.00269532	0.0105048	0.0107575	24	0.00698061	0.0117359	0.00443182	-0.00311396	0.0119937	24	0.00546026	-0.00571797	0.00619567	-0.0105562	0.00483041	24	0.0078403	0.00333069	0.00915356	0.00427215	0.00170341	24	0.00413557	0.00684577	0.0134329	0.00177574	0.0109481
25	0.010385	0.0194837	0.0050873	0.00542254	0.00275559	25	25	-0.00185708	0.0120295	0.0037689	0.00790523	0.00687787	25	0.00431043	0.0100621	0.00143591	-0.002396	0.00850095	25	0.00688132	-0.00786763	0.00199895	-0.013083	0.00329976	25	0.00535854	0.0051364	0.00788183	0.00361838	8.16057e-05	25	0.00278071	0.00630479	0.0141395	0.00154967	0.0114682
26	0.00981178	0.0186662	0.0073638	0.00844391	0.00330378	26	26	-0.00551466	0.0128262	0.00292631	0.00966939	0.00532839	26	0.00454184	0.0118402	0.00472936	-0.00495945	0.0122574	26	0.00562163	-0.00656098	0.000797653	-0.0113623	0.00176067	26	0.00566257	0.00330625	0.00831048	0.00369592	0.00225032	26	0.00463295	0.00792122	0.0132059	0.00335005	0.0118048
27	0.00882413	0.0175867	0.00695208	0.0070537	0.00159005	27	27	-0.00555318	0.013091	0.00494421	0.0103348	0.00810394	27	0.00388358	0.0105009	0.00264175	-0.00228277	0.0110812	27	0.00675969	-0.00728355	0.00139529	-0.0112696	0.000862272	27	0.00540937	0.00334355	0.00779804	0.00443053	0.00203966	27	0.00498979	0.00777362	0.0132531	0.00281379	0.0116423
28	0.00995586	0.0195129	0.00385109	0.00523711	0.00322307	28	28	-0.00729591	0.0115709	0.00308789	0.00906019	0.00724984	28	0.00258266	0.0104026	0.00223097	-0.00626406	0.0123114	28	0.0059215	-0.00843486	0.00146277	-0.0110442	0.00244712	28	0.00630786	0.00286048	0.00754965	0.00280058	0.00108436	28	0.0045222	0.00902404	0.0144013	0.00121981	0.0106762
29	0.00659826	0.0188959	0.00584474	0.00532092	0.00209002	29	29	-0.00569399	0.0119801	0.00250502	0.00790044	0.00596927	29	0.00170499	0.0118246	0.00132629	-0.00446434	0.00883788	29	0.00656459	-0.00621776	0.00234958	-0.0131528	0.00089238	29	0.00444739	0.00248962	0.00821942	0.00356645	2.28415e-05	29	0.00364178	0.00708724	0.0129723	0.00197459	0.0114831
30	0.00583716	0.0194179	0.00493015	0.00630255	0.00185838	30	30	-0.0063066	0.0118405	0.00361929	0.00821402	0.00533905	30	0.00196277	0.0108654	0.00176719	-0.00430292	0.00890862	30	0.00652365	-0.00758101	0.000179532	-0.0107599	-0.000531092	30	0.00389374	0.00201807	0.00789246	0.00290966	0.00125223	30	0.00412148	0.00721754	0.0139257	0.00245353	0.0104466
31	0.00755146	0.0174207	0.00474787	0.00721504	-6.07929e-05	31	31	-0.00676635	0.00787602	0.00408008	0.00731757	0.00532958	31	0.00334763	0.00996854	0.00136243	-0.00438484	0.0122886	31	0.00817955	-0.00708605	0.00207727	-0.0103852	0.00244953	31	0.00500173	0.00298822	0.00607021	0.00363507	0.00138249	31	0.00533382	0.00845354	0.0123528	0.0013898	0.0101912
32	0.00735936	0.0198209	0.00445034	0.00440739	0.000515691	32	32	-0.0054954	0.012003	0.00296581	0.00907097	0.00512938	32	0.000726598	0.00993976	0.00263452	-0.0039307	0.00912084	32	0.00500985	-0.00747744	0.00041449	-0.0129962	0.00237486	32	0.00428519	0.00229127	0.00811548	0.00261021	0.000160718	32	0.00373964	0.00684502	0.0140582	0.00204129	0.0116304
33	0.00922191	0.017287	0.00432462	0.00934802	-0.00137518	33	33	-0.00412938	0.0140719	0.00327101	0.00804646	0.00469936	33	-5.75523e-05	0.0116891	0.00110103	-0.00506907	0.0110201	33	0.00404521	-0.00841799	0.0018134	-0.0128396	-0.00110313	33	0.00331028	0.00304591	0.00764698	0.00313634	0.0015183	33	0.00585383	0.0067315	0.0140052	0.00126102	0.0124513
34	0.00864247	0.0157868	0.00395586	0.00925059	0.000854245	34	34	-0.00494177	0.0129273	0.000108914	0.0081829	0.00455366	34	0.0012062	0.00919038	0.00401141	-0.006717	0.00894339	34	0.00580468	-0.00855769	0.000821751	-0.0143216	0.000505802	34	0.00371427	0.00316846	0.0067188	0.00162884	0.00103729	34	0.00393795	0.00716555	0.0133069	0.00204653	0.0133119
35	0.00772895	0.0163411	0.00483796	0.0070757	-0.00276188	35	35	-0.00474319	0.0127865	0.00126388	0.00768381	0.0031025	35	-0.000557538	0.0116783	0.00312721	-0.00578943	0.00862925	35	0.00606963	-0.00890332	0.0013977	-0.012807	-0.000955003	35	0.00200372	0.00301846	0.00674144	0.00249985	0.000650829	35	0.00505206	0.00677279	0.0136648	0.00202597	0.0116588
36	0.00736562	0.0177464	0.00200831	0.00695942	-0.00330692	36	36	-0.00682773	0.0119091	0.00337154	0.00923374	0.00303853	36	0.000128294	0.00947335	-0.00019274	-0.0067435	0.00874315	36	0.00650678	-0.00995828	0.000866333	-0.00996343	0.000391395	36	0.00221654	0.00234822	0.00656575	0.00208206	0.00207657	36	0.00506992	0.00795821	0.0146048	0.00125423	0.0104888
37	0.00700335	0.0179928	0.00618103	0.0072559	-0.0034914	37	37	-0.00788926	0.0111762	-0.000183119	0.0094755	0.000498722	37	-0.000430443	0.0109781	0.0008854	-0.00587255	0.0110596	37	0.00730884	-0.0110795	-0.00146879	-0.0130878	-0.00343705	37	0.00115748	0.00214097	0.00602982	0.00150971	0.00121454	37	0.00686072	0.00868778	0.015204	0.00409624	0.0124358
38	0.0069856	0.0165917	0.00436862	0.00695837	-0.00496825	38	38	-0.00619106	0.0117539	-0.000840192	0.00883758	0.00369363	38	-0.00117383	0.00962562	0.00188885	-0.00705068	0.00979348	38	0.00497854	-0.00989566	5.5426e-05	-0.0150385	-0.00338406	38	0.0012837	0.00192436	0.00614997	0.00119462	0.000252473	38	0.00680928	0.00709944	0.0141049	0.00278501	0.0132757
39	0.00596558	0.0159601	0.00521197	0.00781324	-0.00615266	39	39	-0.00757153	0.011607	0.00180007	0.00789326	0.00262155	39	-0.00252151	0.0106927	0.001301	-0.00552562	0.00896737	39	0.00474611	-0.00880819	0.00156157	-0.0132456	-0.00213762	39	0.000824661	0.00104672	0.00625297	0.00285787	0.000820294	39	0.00650617	0.00748849	0.0132237	0.00204219	0.0121815
40	0.00492782	0.0163589	0.00363004	0.00645236	-0.00625119	40	40	-0.008071	0.0110149	-0.000878492	0.00944438	0.00193447	40	-0.000914842	0.0113546	0.0012492	-0.0064315	0.00866042	40	0.00572159	-0.00828432	-0.00216402	-0.0167676	-0.00333227	40	0.000252859	0.000859468	0.00636315	0.000195842	-0.000290277	40	0.00654906	0.00774419	0.0129634	0.00304277	0.014348

## Sheet: Figure5D_withSec18_Sec17 FSMS
	Replicate 1							Replicate 2						Replicate 3						Replicate 4						Average						Stdev
	100nM	500nM	1000nM	2000nM	0nM			100nM	500nM	1000nM	2000nM	0nM		100nM	500nM	1000nM	2000nM	0nM		100nM	500nM	1000nM	2000nM	0nM		100nM	500nM	1000nM	2000nM	0nM		100nM	500nM	1000nM	2000nM	0nM
Time (min)	FSMS	FSMS	FSMS	FSMS	Buffer	Time (min)	Time (min)	FSMS	FSMS	FSMS	FSMS	Buffer	Time (min)	FSMS	FSMS	FSMS	FSMS	Buffer	Time (min)	FSMS	FSMS	FSMS	FSMS	Buffer	Time (min)	FSMS	FSMS	FSMS	FSMS	Buffer	Time (min)	w.t.	w.t.	w.t.	w.t.	Buffer
0	0.00504581	0.00362347	0.00212718	0.0046857	0.00135306	0	0.00165169	0.0503085	0.0142862	0.041263	0.018044	0	0.00365169	0.00528348	0.00762448	0.0361728	0.0179689	0	0.0153801	0.00129677	0.0128964	0.0190446	0.0203057	0	0.0144179	0.00735922	0.0184096	0.00976994	0.0216645	0	0.00877715	0.00715063	0.0276498	0.0066552	0.0184289
1	0.00665682	0.00370208	0.000523094	0.00114427	0.00721528	1	-0.0029795	0.0362416	-0.0030307	0.0217563	0.0172539	1	0.0061967	0.0073923	0.00477684	0.0175307	0.0221216	1	0.0137331	-0.000959685	0.0112375	0.0123622	0.0197731	1	0.016591	0.00580347	0.0129947	0.00290995	0.0117543	1	0.00655889	0.00838891	0.0202669	0.00742751	0.0103195
2	0.00649436	0.00270948	-0.00210292	0.000534695	0.00713385	2	-0.00136844	0.0169532	0.000603744	0.0215958	0.0157494	2	0.00575811	0.00718563	0.00594108	0.0160199	0.0208455	2	0.010271	-0.00417223	0.0129191	0.0139972	0.0186659	2	0.0155987	0.00513231	0.00516347	0.00380665	0.0120426	2	0.00601701	0.00593807	0.0107744	0.00800684	0.0106658
3	0.00890825	0.00411191	0.00142796	0.000931234	0.00959776	3	-0.00293528	0.0179021	-0.00161957	0.0207441	0.0152922	3	0.00536399	0.00847255	0.00244238	0.0176722	0.0201041	3	0.0122804	-0.0021257	0.0124016	0.0144574	0.0156237	3	0.0151544	0.00608445	0.00662944	0.00407	0.0120442	3	0.00430563	0.00799121	0.0102485	0.00737452	0.0101245
4	0.00675849	0.00460454	-0.000472472	0.00288651	0.00615455	4	-0.00173416	0.019543	0.000557026	0.0207657	0.0173119	4	0.00706546	0.00569923	0.00408501	0.0165127	0.0190611	4	0.010475	-0.00513791	0.0110343	0.0115351	0.0162463	4	0.0146935	0.00516643	0.00633656	0.00370628	0.0117291	4	0.00580968	0.00625833	0.0124313	0.00636707	0.00894116
5	0.00699642	0.00444836	0.00170533	0.00316809	0.00854538	5	-0.00262454	0.0199673	0.00195498	0.0193545	0.0165964	5	0.00593836	0.00711593	0.00691587	0.0169851	0.0170568	5	0.0121256	-0.00256836	0.0102287	0.0102813	0.013468	5	0.0139167	0.00549917	0.00728244	0.00462967	0.0109346	5	0.00391978	0.0074882	0.0115321	0.0048505	0.00811298
6	0.00724379	0.00475652	0.00233916	0.0017665	0.00723616	6	-0.00191582	0.0195562	0.00174894	0.0211059	0.0140507	6	0.00524743	0.00536519	0.00439676	0.0156662	0.0183065	6	0.00891187	-0.00211371	0.0125725	0.00839164	0.0150503	6	0.0136609	0.00474661	0.00739967	0.00555354	0.0104213	6	0.00465265	0.00582981	0.0110741	0.00608577	0.00982816
7	0.00636648	0.00447352	0.000915415	0.00160514	0.00755355	7	-0.00228393	0.0185367	-0.000165311	0.0200433	0.016138	7	0.00579777	0.00692728	0.00358743	0.0187069	0.0173825	7	0.00993754	-0.00381235	0.0111514	0.00916973	0.0148247	7	0.0139747	0.00467336	0.0063993	0.00396717	0.0102727	7	0.00440631	0.00628419	0.0112983	0.00624515	0.00926846
8	0.00821962	0.00538541	0.0019732	0.00151866	0.00737711	8	-0.00119395	0.0195514	0.00148061	0.0213658	0.0131824	8	0.00396892	0.00696333	0.00215342	0.0156542	0.0165233	8	0.00928255	-0.00275669	0.0105466	0.00920798	0.0131141	8	0.0125492	0.00543607	0.00739338	0.00466681	0.0106975	8	0.00379756	0.00576631	0.0112888	0.00509802	0.0100071
9	0.00830452	0.00488335	0.0026334	0.0033052	0.00589876	9	-0.000585622	0.0172292	0.000179686	0.0230477	0.0155729	9	0.00540003	0.00719163	0.00338719	0.0166014	0.0174414	9	0.00886509	-0.00344647	0.0116068	0.0108992	0.0143017	9	0.0133037	0.00552799	0.00622204	0.00480662	0.0124174	9	0.00510225	0.00530196	0.0104027	0.00601555	0.00995842
10	0.00675954	0.00522085	0.00175384	0.00157877	0.00749508	10	-0.000607135	0.019359	0.00484073	0.02058	0.014489	10	0.0052282	0.00684677	0.00448668	0.0144133	0.0176468	10	0.00937132	-0.00376556	0.0130936	0.00536056	0.0147264	10	0.0135893	0.00517458	0.00693809	0.00656274	0.00917311	10	0.00430912	0.0051746	0.0116575	0.00586274	0.010058
11	0.00809698	0.00674487	0.0010947	0.00167053	0.00711401	11	-0.00220624	0.0184602	0.00367517	0.0210304	0.0139263	11	0.00468147	0.00577013	0.00362819	0.0162945	0.0172046	11	0.0101055	-0.002428	0.0102837	0.00888288	0.0115654	11	0.0124526	0.00533207	0.00759237	0.00501785	0.0105279	11	0.00424427	0.00660516	0.0104699	0.00473934	0.00978422
12	0.00766095	0.00508145	0.00271039	0.0032936	0.0076924	12	-0.000795968	0.0199625	0.0025707	0.0245187	0.0147141	12	0.00496385	0.00651513	0.00317377	0.0160931	0.0144482	12	0.0109716	-0.00351125	0.0123538	0.00903228	0.0142753	12	0.0127825	0.00594553	0.00717758	0.0058783	0.0122815	12	0.00339819	0.00606844	0.0118764	0.00560838	0.0109793
13	0.00840829	0.00246421	0.00103142	0.00200801	0.00767988	13	0.00275242	0.019959	0.00383809	0.0200769	0.0124491	13	0.00438948	0.00492299	0.00734152	0.0173472	0.0128632	13	0.00814053	-0.000389872	0.00989642	0.0105454	0.0122528	13	0.0113112	0.00643375	0.00734443	0.00492198	0.0108768	13	0.00243425	0.00319093	0.0110173	0.0045308	0.00903899
14	0.00876361	0.00779826	0.00371334	0.000777259	0.0104413	14	0.00235085	0.0194116	0.00379017	0.0234873	0.01241	14	0.00562233	0.00555264	0.00624083	0.0141938	0.0128356	14	0.00918778	-0.000539823	0.0130745	0.0104594	0.0125395	14	0.0120566	0.00676742	0.00889001	0.00685934	0.0115746	14	0.00109148	0.00383073	0.0100204	0.00538263	0.011396
15	0.0100025	0.00601011	0.00402656	0.00335265	0.00859444	15	-0.000604744	0.0187602	0.00430048	0.0200014	0.0113841	15	0.00505157	0.00802916	0.0051893	0.0129685	0.012683	15	0.0079138	-0.00400069	0.0129395	0.00774383	0.0137571	15	0.0116047	0.00577053	0.00692322	0.00708883	0.010366	15	0.00222903	0.00561905	0.0114079	0.00506864	0.00862856
16	0.00706979	0.00636439	0.00302361	0.00468676	0.00517943	16	0.000895165	0.0201143	0.00504438	0.0236981	0.0104388	16	0.00605371	0.00549616	0.0037457	0.0146902	0.0165366	16	0.00843323	-0.00355443	0.0134988	0.00965499	0.013354	16	0.0113772	0.00546606	0.00764143	0.00718893	0.01268	16	0.00482423	0.00401679	0.0118859	0.00555714	0.00986008
17	0.00897638	0.00574493	0.00373337	0.00114427	0.00686345	17	0.00404318	0.0192921	0.00601947	0.0248673	0.0128768	17	0.00444475	0.00833557	0.00493271	0.0144516	0.0151403	17	0.00834566	-0.0015331	0.0113044	0.0122988	0.0124687	17	0.0118373	0.00712174	0.00783463	0.00701908	0.0127701	17	0.00351796	0.0026847	0.0105687	0.00388323	0.0118685
18	0.00508459	0.00832443	0.00104092	0.00188251	0.00831256	18	0.00215127	0.0215162	0.00612369	0.0256184	0.0112088	18	0.0054457	0.0064911	0.00477085	0.0149492	0.0153926	18	0.00904743	-0.00362521	0.0125928	0.00923427	0.0115666	18	0.0116201	0.00542776	0.00873849	0.00658581	0.0122451	18	0.00290653	0.00346087	0.0125758	0.00578981	0.012151
19	0.00466847	0.00669455	0.00348659	0.00473421	0.00769032	19	0.00259586	0.0176989	0.00830986	0.0248817	0.0126173	19	0.00762902	0.0072397	0.00457421	0.0140895	0.0159141	19	0.00787781	0.000302301	0.0117622	0.00982112	0.0147911	19	0.0127532	0.00504738	0.00823193	0.00785287	0.0131457	19	0.00364215	0.00266128	0.00879962	0.00415667	0.0104771
20	0.00944596	0.00738529	0.00334844	0.0047996	0.00625164	20	0.00297233	0.0217816	0.00764263	0.0227638	0.0102315	20	0.00629643	0.00880059	0.005314	0.0129121	0.0167889	20	0.00814413	-0.00211251	0.0141323	0.0118996	0.0133156	20	0.0116469	0.00685414	0.00901811	0.00837445	0.0131543	20	0.00448467	0.00342418	0.0120304	0.00542904	0.00904758
21	0.00718823	0.0083737	0.00210187	0.00509911	0.0046334	21	5.01962e-05	0.0194343	0.00802716	0.022202	0.0088692	21	0.00772275	0.0100407	0.00546507	0.0135008	0.016396	21	0.00964603	-0.00373557	0.0154124	0.00842391	0.0158156	21	0.0114285	0.00562815	0.00802414	0.0085138	0.0119083	21	0.00567585	0.00498452	0.0115889	0.00666858	0.00906823
22	0.00690733	0.0051632	0.00483757	0.00213562	0.00830629	22	0.00209748	0.019022	0.0078307	0.0248254	0.0117514	22	0.00532313	0.00528468	0.00635953	0.0120021	0.0153241	22	0.0082257	-0.00145992	0.0109028	0.0111861	0.0145404	22	0.0124806	0.0057435	0.00757508	0.00785702	0.0127157	22	0.00317727	0.00322562	0.0104518	0.0030327	0.011422
23	0.00686436	0.00858018	0.00420585	0.00486288	0.00652936	23	0.00224568	0.0214816	0.00912564	0.0244912	0.00908006	23	0.00414075	0.00533755	0.00230569	0.0145368	0.0155909	23	0.00798818	-0.00412065	0.0145052	0.0118841	0.013907	23	0.0112768	0.0056994	0.00864704	0.00927889	0.013746	23	0.00419894	0.00304334	0.0128012	0.00515138	0.00994573
24	0.00809384	0.00628682	0.00391688	0.00448005	0.00742931	24	0.00101588	0.020725	0.0074881	0.0259239	0.00936319	24	0.00624116	0.00541205	0.00698061	0.0117359	0.0165666	24	0.00813333	0.00082173	0.0129622	0.0100064	0.0136143	24	0.0117434	0.00574768	0.00927787	0.00812238	0.0134701	24	0.00412474	0.00409791	0.0102833	0.00455588	0.0111336
25	0.0063298	0.00782132	0.00254692	0.00489241	0.00806095	25	-0.0002462	0.0229755	0.00846919	0.0246205	0.00977662	25	0.00407826	0.00536759	0.00431043	0.0100621	0.014775	25	0.00715565	-0.00413144	0.0141861	0.0126251	0.0129557	25	0.0113921	0.00441308	0.00888846	0.00840072	0.014046	25	0.00303289	0.00405613	0.0135849	0.00581988	0.00994052
26	0.00797645	0.00740101	0.00392321	0.00645114	0.00892749	26	0.000328665	0.0231213	0.0108243	0.0267935	0.00806959	26	0.00300763	0.0093329	0.00454184	0.0118402	0.0169127	26	0.00763909	-0.00308539	0.0160315	0.0122283	0.0126942	26	0.011651	0.00531473	0.00914565	0.0102597	0.0151577	26	0.00404217	0.00432136	0.0131902	0.00607385	0.0104828
27	0.00675325	0.00647549	0.00596602	0.00558846	0.00483699	27	0.00187399	0.0245232	0.0101606	0.0286335	0.0075223	27	0.00502153	0.00767708	0.00388358	0.0105009	0.0157988	27	0.0103886	-0.00299182	0.0123622	0.0139136	0.0112871	27	0.00986129	0.00633861	0.00933563	0.00949627	0.0160452	27	0.00476099	0.00427242	0.0139787	0.00324942	0.0116695
28	0.00746914	0.00816616	0.00648595	0.00545769	0.00768614	28	0.00241061	0.0209581	0.0104661	0.0262904	0.00867611	28	0.005227	0.00891354	0.00258266	0.0104026	0.0158072	28	0.00862037	-0.00307579	0.0128247	0.0117048	0.0118041	28	0.0109934	0.00616671	0.00868282	0.00992558	0.0144843	28	0.00365775	0.00330341	0.0120253	0.00320376	0.0106909
29	0.00649016	0.00931074	0.00623705	0.00637521	0.00445069	29	0.000506742	0.020253	0.0130823	0.0250542	0.00552148	29	0.00774437	0.00973184	0.00170499	0.0118246	0.01878	29	0.00703329	-0.000476244	0.0124148	0.0168383	0.0105397	29	0.00982297	0.00467673	0.00969582	0.010578	0.0160892	29	0.00653466	0.00362151	0.01037	0.00377419	0.00936198
30	0.00620297	0.00901621	0.00425119	0.00682026	0.00411556	30	0.00131347	0.0232229	0.0129434	0.0265204	0.00695487	30	0.00486412	0.00703663	0.00196277	0.0108654	0.0137536	30	0.00508513	0.000136755	0.0124351	0.0136972	0.0130373	30	0.00946534	0.00420052	0.010792	0.00987654	0.0156793	30	0.00469294	0.00256197	0.0116451	0.00487832	0.00999852
31	0.00671971	0.00739577	0.00589325	0.00652075	0.00350898	31	0.000598769	0.0209987	0.0115047	0.0286479	0.00903623	31	0.00422005	0.00677227	0.00334763	0.00996854	0.0134941	31	0.00677897	-0.000939292	0.0119785	0.0136375	0.011557	31	0.00939907	0.00469915	0.00915174	0.00979214	0.0162687	31	0.00433015	0.00355116	0.0110739	0.00338484	0.0112958
32	0.00694821	0.00774585	0.00607886	0.0084254	0.00406023	32	-0.000813895	0.0232361	0.0145342	0.0285281	0.00827097	32	0.00687441	0.00930286	0.000726598	0.00993976	0.0118539	32	0.00632552	-0.00419022	0.0130231	0.0148554	0.010217	32	0.00860053	0.00415328	0.00893056	0.0112121	0.0172696	32	0.00336256	0.00431295	0.0137515	0.00450922	0.0102665
33	0.00545878	0.00814205	0.00627186	0.00589641	0.00325006	33	-0.00122622	0.0230365	0.0131075	0.0272559	0.00567075	33	0.00662087	0.00744517	-5.75523e-05	0.0116891	0.0135962	33	0.007909	-0.00201774	0.0122582	0.0172673	0.0121676	33	0.00867116	0.00404719	0.00972026	0.0105458	0.0168066	33	0.00499573	0.00472837	0.0126014	0.00372565	0.0106872
34	0.00780455	0.009991	0.00673484	0.00663465	0.00177485	34	-0.00461088	0.0195466	0.0113178	0.0272511	0.00601428	34	0.00760018	0.0076867	0.0012062	0.00919038	0.0154443	34	0.00592365	-0.00316336	0.0131857	0.0152092	0.0102374	34	0.00836772	0.00303911	0.00879142	0.0104128	0.016365	34	0.00584746	0.0066915	0.0114024	0.00331928	0.0103567
35	0.00712115	0.0106901	0.00544398	0.00784536	0.00245869	35	-0.00448061	0.0219596	0.0123025	0.0254806	0.00810513	35	0.00718683	0.0101212	-0.000557538	0.0116783	0.0124066	35	0.00666261	-0.00324373	0.00962272	0.0186622	0.00923217	35	0.00805065	0.00310105	0.009802	0.00912306	0.0173294	35	0.00414903	0.00656991	0.0126251	0.00345645	0.00889286
36	0.00741044	0.0107446	0.00763549	0.00736656	0.000990783	36	-0.00308467	0.0214601	0.0120234	0.0289953	0.00500499	36	0.00710271	0.00739831	0.000128294	0.00947335	0.0117481	36	0.00773386	-0.00255636	0.0102765	0.0161403	0.00993514	36	0.00691976	0.00401988	0.00988277	0.00997845	0.0175007	36	0.00487254	0.00615485	0.0120314	0.00220907	0.0108784
37	0.00801418	0.00958326	0.00694471	0.00743616	-0.00072038	37	-0.00547019	0.0224269	0.0107356	0.0307203	0.0030101	37	0.00437867	0.00778883	-0.000430443	0.0109781	0.0125965	37	0.00601602	-0.00369959	0.00897969	0.0155247	0.0137715	37	0.00716442	0.00285334	0.00943687	0.00888667	0.0178937	37	0.00713183	0.00727729	0.0130639	0.00189717	0.0118214
38	0.00392533	0.011406	0.0048576	0.00814804	-0.000207762	38	-0.00429536	0.0209199	0.0104912	0.0313971	0.00388553	38	0.00449642	0.0104444	-0.00117383	0.00962562	0.0110344	38	0.00520149	-0.00684375	0.0101833	0.0178996	0.0101175	38	0.00620741	0.00161049	0.00849404	0.00851071	0.0191482	38	0.00532709	0.00515426	0.014109	0.00316743	0.0116747
39	0.00483513	0.00836217	0.0078538	0.0122379	-0.00051053	39	-0.00565783	0.0226815	0.0111489	0.0297847	0.00552622	39	0.00463581	0.00657401	-0.00252151	0.0106927	0.0163467	39	0.00662063	-0.0057929	0.00703507	0.0199494	0.00769547	39	0.00726447	0.00193264	0.00841692	0.00867925	0.0206573	39	0.00697961	0.00663388	0.0142373	0.0021776	0.00879481
40	0.00653838	0.010622	0.00702908	0.010676	0.00034975	40	-0.00446148	0.0223469	0.011646	0.0309694	0.00390804	40	0.00636012	0.00463221	-0.000914842	0.0113546	0.0145431	40	0.00296423	-0.00749514	0.00546933	0.016665	0.00802057	40	0.00670536	0.00168037	0.00849124	0.00804814	0.0194368	40	0.00609312	0.00561119	0.0150347	0.00321198	0.0104268

## Sheet: Figure5E_without 18_Sec17 KEKE
	Replicate 1						Replicate 2						Replicate 3						Replicate 4						Average						Stdev
	100nM	500nM	1000nM	2000nM	0nM		100nM	500nM	1000nM	2000nM	0nM		100nM	500nM	1000nM	2000nM	0nM		100nM	500nM	1000nM	2000nM	0nM		100nM	500nM	1000nM	2000nM	0nM		100nM	500nM	1000nM	2000nM	0nM
Time (min)	KEKE	KEKE	KEKE	KEKE	Buffer	Time (min)	KEKE	KEKE	KEKE	KEKE	Buffer	Time (min)	KEKE	KEKE	KEKE	KEKE	Buffer	Time (min)	KEKE	KEKE	KEKE	KEKE	Buffer	Time (min)	KEKE	KEKE	KEKE	KEKE	Buffer	Time (min)	KEKE	KEKE	KEKE	KEKE	Buffer
0	0.00498837	0.0116347	0.0120027	0.00997869	0	0	0.00930343	0.0154331	0.0545383	0.00897641	0.0190178	0	0.00847098	0	0.00540636	0.0132413	0.018388	0	0.0089515	0.00458714	0.00971763	0.00533656	0.0182017	0	0.0139019	0.00774777	0.0105516	0.0254195	0.00809722	0	0.00927448	0.00239618	0.00550349	0.0252434	0.00244276
1	0.00772059	0.0102701	0.0141483	0.0088022	0.00278075	1	0.00533052	0.0159169	0.024885	0.00930675	0.0165846	1	0.00595546	0.00208267	0.00203702	0.00646523	0.015159	1	0.0100185	0.0016571	0.00736443	0.00377138	0.0150536	1	0.0123945	0.00768987	0.00928138	0.0154659	0.00729344	1	0.00644709	0.00234414	0.00718115	0.0088343	0.00306061
2	0.00870824	0.0105865	0.0108	0.0122363	0.00260781	2	0.00429065	0.0171831	0.0246253	0.00765269	0.0192215	2	0.0043404	-0.0016918	0.00220928	0.0025514	0.0153245	2	0.00710893	0.00118141	0.00629808	-0.000143385	0.00902616	2	0.011545	0.00670261	0.00965031	0.0139078	0.00658188	2	0.00728999	0.00223665	0.0080418	0.00955067	0.00625894
3	0.00895986	0.0115209	0.0136653	0.0129215	0.00337296	3	0.00130344	0.0138095	0.00699562	0.00636248	0.0196196	3	0.00578521	0.000532359	0.00259476	-0.00123595	0.0164887	3	0.00532778	-0.000782789	0.00573418	-0.000193991	0.00716192	3	0.0116608	0.00519703	0.00818253	0.00879837	0.00636333	3	0.00765026	0.00382988	0.00784807	0.00426182	0.00655774
4	0.00784901	0.0120189	0.0173561	0.0108011	0.00477119	4	0.00122401	0.0160301	0.00725773	0.00745042	0.0171722	4	0.0062732	0.000782951	-0.000649294	0.00140821	0.0164216	4	0.00547712	-0.000851434	0.0045112	-0.00129167	0.00908999	4	0.0118637	0.00485004	0.00906583	0.00970835	0.00565328	4	0.0059708	0.00335672	0.00881967	0.00676403	0.00624347
5	0.00809958	0.0128739	0.0124061	0.0105664	0.00624594	5	0.00390311	0.0169279	0.00848331	0.00881843	0.0180973	5	0.0075957	0.00083211	0.00133593	0.00253453	0.0131555	5	0.00550481	-0.00102244	0.00306892	-0.0018893	0.00661758	5	0.0110291	0.00583583	0.00959313	0.00798609	0.00583185	5	0.00568101	0.00211773	0.00941417	0.00468839	0.00674359
6	0.0103046	0.0144525	0.0123505	0.0116989	0.0037723	6	0.000753422	0.0161925	0.00765149	0.010749	0.0151844	6	0.00779834	-0.000141483	0.000558947	0.000832397	0.0145703	6	0.00415842	-0.00306492	0.00599806	-0.00338219	0.00600821	6	0.0098838	0.00507213	0.00919337	0.00866669	0.00635522	6	0.00584324	0.00484069	0.0106516	0.00329567	0.00844621
7	0.0102179	0.012189	0.0132808	0.0128104	0.00432468	7	0.00294268	0.0171277	0.00798422	0.00880287	0.0139168	7	0.00440275	0.00117982	0.00209364	0.00102152	0.0135128	7	0.00523385	-0.00117659	0.00457988	-0.00048317	0.0067368	7	0.00962278	0.00613148	0.00938005	0.00861497	0.00704338	7	0.00482942	0.00371975	0.00946993	0.00438463	0.00681923
8	0.00781664	0.0124521	0.0144667	0.0102458	0.00460349	8	0.00110365	0.0172156	0.00619373	0.0100356	0.0151216	8	0.00530201	0.00217979	-0.00036982	-0.00100707	0.0154984	8	0.00459076	-0.00390311	0.00428949	-0.00442324	0.00524589	8	0.0101173	0.00450369	0.0085882	0.00831665	0.00528608	8	0.00600365	0.00335734	0.0110769	0.00541057	0.00840917
9	0.00923443	0.0140526	0.0153007	0.011415	0.0044274	9	0.00260689	0.014374	0.00591725	0.00950782	0.0141241	9	0.00243278	0.000291359	-0.00174912	0.00222494	0.0147322	9	0.00252179	-0.00270484	0.00574262	-0.00256406	0.00626111	9	0.00988621	0.0047877	0.00857393	0.00898684	0.00611959	9	0.00530357	0.00385122	0.00976902	0.00546862	0.00758047
10	0.00911124	0.0128322	0.0140341	0.00980374	0.00377964	10	0.00158267	0.0164477	0.00714523	0.0092876	0.0135212	10	0.0056665	-0.00161866	0.00168045	-0.000674591	0.0145164	10	0.00343343	-0.00335636	0.00356413	-0.00193509	0.00578421	10	0.00940035	0.00470911	0.00864117	0.00824781	0.00571875	10	0.0054106	0.00392306	0.0105463	0.00532134	0.00663344
11	0.00894211	0.0137457	0.0152368	0.0122259	0.00442635	11	0.00375748	0.0146544	0.00457438	0.0114766	0.0135698	11	0.00436318	0.00184407	0.000803486	-0.000287906	0.0120009	11	0.00361167	-0.00431979	0.00653184	-0.0046582	0.00385132	11	0.00846207	0.00543709	0.00802677	0.00878099	0.0063481	11	0.00503843	0.00303631	0.0107021	0.00567588	0.00953909
12	0.0116294	0.0131569	0.012448	0.0095565	0.0044295	12	0.00287769	0.0133811	0.00737981	0.0095904	0.0148089	12	0.00392914	0.00167261	-0.00149615	0.00110585	0.013556	12	0.00248445	-0.00417528	0.0028942	-0.00562936	0.00517243	12	0.00949169	0.00566386	0.00745421	0.00757399	0.00450585	12	0.00544893	0.00517008	0.0100721	0.00477984	0.00877736
13	0.00960715	0.0142729	0.0134474	0.0101128	0.006443	13	0.00343373	0.0133558	0.00819367	0.00878492	0.0125711	13	0.00242799	0.00451186	-0.000154192	-0.000654112	0.0102995	13	0.00647186	-0.00427403	0.00389187	-0.00479074	0.00663805	13	0.00898791	0.00650425	0.00778489	0.00851098	0.00470232	13	0.00297534	0.00308684	0.0104534	0.00478566	0.008248
14	0.00935763	0.0145078	0.0136433	0.0113511	0.00615161	14	0.00179088	0.0157159	0.00757609	0.00724576	0.0123946	14	0.00356584	0.00222056	-0.00040355	0.00103357	0.0108018	14	0.00425596	-0.00286019	0.00214836	-0.00635592	0.00652605	14	0.00896853	0.00513483	0.00912119	0.00778925	0.00408031	14	0.00310912	0.00385917	0.0103938	0.00575044	0.0092682
15	0.00985354	0.0125075	0.0114747	0.0115103	0.00494099	15	0.00305461	0.0126445	0.00740734	0.00937975	0.0105679	15	0.00441474	0.000525165	-0.00333681	0.000373434	0.0112934	15	0.00342982	-0.00494121	0.00390031	-0.00226885	0.00792664	15	0.00868225	0.00544599	0.00673691	0.00759412	0.00620708	15	0.0028834	0.00382166	0.0101138	0.00379065	0.00741727
16	0.00705972	0.0124636	0.0144196	0.0129823	0.00529946	16	0.00365036	0.0146785	0.00783342	0.0122355	0.0100988	16	0.00549624	0.00358623	-0.00139134	-0.00227674	0.0123833	16	0.00368874	-0.00192687	0.00126636	-0.00190979	0.00467506	16	0.00811417	0.00479961	0.00840508	0.00783979	0.0077693	16	0.00373786	0.00195741	0.009016	0.00657662	0.00839065
17	0.00965622	0.0135682	0.0132316	0.0110798	0.00573654	17	0.0016946	0.0134918	0.00797465	0.0118955	0.00895686	17	0.00582357	0.00330686	-0.00250562	-0.000181899	0.0119913	17	0.00361769	-0.00425596	0.000524137	-0.00518836	0.00364539	17	0.00758251	0.0049895	0.00760134	0.00724346	0.00592898	17	0.00366217	0.00415431	0.0102688	0.0063852	0.00963653
18	0.0110375	0.0141341	0.0116937	0.0135511	0.00442635	18	0.00249375	0.0134665	0.00651807	0.0110518	0.0123579	18	0.00342316	-0.000876474	5.90267e-05	-0.00291038	0.0127083	18	0.00566137	-0.00448117	0.00369668	-0.00428829	0.00556623	18	0.00876469	0.00639753	0.00770647	0.0073028	0.00677153	18	0.00437852	0.00431917	0.0105601	0.00405584	0.00965926
19	0.0108913	0.0144963	0.0126093	0.0115093	0.00337086	19	0.00385376	0.0128479	0.00609199	0.01005	0.0102291	19	0.00384521	0.000454423	-0.00369459	-0.000970929	0.0139145	19	0.00339971	-0.00329253	0.00226885	-0.00692102	0.000893584	19	0.00710201	0.00604826	0.00801723	0.00699005	0.00487942	19	0.00601815	0.00420034	0.00982916	0.00522839	0.0102455
20	0.0103808	0.0126025	0.0153405	0.0123065	0.00381004	20	0.00636437	0.0114121	0.00652525	0.0100584	0.0105442	20	0.00641348	0.00184407	-0.00237914	-0.00174671	0.00991458	20	0.00330457	-0.00120309	0.00306048	-0.00505461	0.00414397	20	0.00710321	0.00668324	0.00760381	0.00830873	0.0057701	20	0.00362154	0.00354886	0.00765019	0.00633128	0.00944163
21	0.00929708	0.0139503	0.014516	0.010778	0.00553215	21	0.00261892	0.0137265	0.00713565	0.00875021	0.00777699	21	0.00304188	-0.00019304	0.00127209	-0.00205991	0.0110848	21	0.00297701	-0.00316849	0.00127239	-0.00268334	0.00614068	21	0.00763366	0.00496434	0.00816943	0.00764134	0.00561497	21	0.00248839	0.00375653	0.00981957	0.00663626	0.00725772
22	0.0112828	0.0143157	0.0126009	0.0104721	0.00377859	22	0.00244561	0.0143656	0.00581193	0.00972684	0.00949823	22	0.00251791	0.00206349	-0.00365243	-0.000851671	0.0129637	22	0.00319017	-0.00472082	0.00233151	-0.00470037	0.00506886	22	0.00782734	0.00563953	0.00798682	0.00691478	0.0051662	22	0.00421011	0.00490139	0.0110052	0.00522278	0.00855282
23	0.0103067	0.0129647	0.0130514	0.0093323	0.00473346	23	0.00391876	0.0123749	0.00720986	0.010792	0.0101427	23	0.00581758	0.0025359	0.000940813	-0.00344282	0.0101028	23	0.0032841	-0.00354423	0.00415575	-0.00852838	0.0044631	23	0.00736051	0.0058365	0.00726514	0.008139	0.00386532	23	0.0031915	0.00388425	0.00936583	0.00452002	0.010758
24	0.00830107	0.0145183	0.0142666	0.0085382	0.00377964	24	0.00299202	0.015208	0.00505073	0.0085264	0.0107575	24	0.00552262	0.000612692	-0.00432581	-0.00483296	0.0119937	24	0.00228454	-0.00769301	0.00238573	-0.00855127	0.00483041	24	0.0078403	0.00452588	0.00734443	0.00723437	0.00283777	24	0.00413557	0.0032885	0.0130274	0.0062342	0.0098632
25	0.0124365	0.0134889	0.0130315	0.0110703	0.00275559	25	0.00285241	0.0139612	0.00332606	0.00702674	0.00687787	25	0.00376488	0.000499986	-0.000269836	-0.00466311	0.00850095	25	0.00130906	-0.00460882	0.000534982	-0.00450999	0.00329976	25	0.00535854	0.00553265	0.00761373	0.00563084	0.00452902	25	0.00278071	0.00602848	0.0105877	0.00655932	0.00808489
26	0.0100154	0.0143972	0.0123076	0.0108357	0.00330378	26	0.00366962	0.0147338	0.0077628	0.00746119	0.00532839	26	0.00630797	0.000904051	-0.00280798	-0.00321876	0.0122574	26	0.00304806	-0.00363575	0.00331472	-0.00540283	0.00176067	26	0.00566257	0.00557768	0.00849842	0.00779503	0.00429801	26	0.00463295	0.00385569	0.0105098	0.00449652	0.00856892
27	0.008655	0.0130942	0.0136611	0.00912801	0.00159005	27	0.00163081	0.0125121	0.00823915	0.00947431	0.00810394	27	0.00766884	0.00224934	-0.00138893	-0.00604963	0.0110812	27	0.00124042	-0.00452091	0.00055426	-0.0103478	0.000862272	27	0.00540937	0.00384208	0.00702847	0.00748484	0.00275151	27	0.00498979	0.00417268	0.0100063	0.00658591	0.0113457
28	0.00788346	0.0132216	0.010734	0.0110839	0.00322307	28	0.00121077	0.0135556	0.00451334	0.00743008	0.00724984	28	0.0032601	-0.000303349	-0.000879377	-0.00350064	0.0123114	28	0.00251095	-0.00546507	0.00315687	-0.00491484	0.00244712	28	0.00630786	0.00386839	0.00710403	0.00613475	0.00453306	28	0.0045222	0.0035374	0.0108864	0.00404043	0.0083836
29	0.00828646	0.0171461	0.0125967	0.00975974	0.00209002	29	0.00271761	0.0136482	0.00752702	0.00529967	0.00596927	29	0.00515213	-0.00127095	-0.00250803	-0.00336332	0.00883788	29	0.00312875	-0.00355988	0.000116877	-0.00728732	0.00089238	29	0.00444739	0.00471094	0.00907815	0.00674687	0.0025907	29	0.00364178	0.0031033	0.0110837	0.00627639	0.0088405
30	0.00884084	0.0138365	0.0133594	0.00852877	0.00185838	30	0.0021375	0.0120487	0.00638163	0.00801654	0.00533905	30	0.00395912	-0.00271695	0.00146964	-0.00475586	0.00890862	30	0.00263981	-0.00650799	4.57867e-05	-0.00878382	-0.000531092	30	0.00389374	0.00453938	0.00645908	0.00659561	0.00258716	30	0.00412148	0.00373363	0.0112653	0.00665938	0.00985089
31	0.00811524	0.0107232	0.0119451	0.0102877	-6.07929e-05	31	0.00190281	0.0103036	0.00648336	0.00704589	0.00532958	31	0.00343515	-0.00497588	-0.0025261	-0.00298145	0.0122886	31	0.000387782	-0.00547109	-0.000167483	-0.00894046	0.00244953	31	0.00500173	0.00346861	0.00518524	0.00608699	0.00279772	31	0.00533382	0.00409477	0.00923104	0.00606601	0.010294
32	0.0104372	0.0143731	0.0102113	0.00780486	0.000515691	32	0.000388746	0.0113254	0.00359775	0.00741212	0.00512938	32	0.00536076	-0.00364018	-0.00186717	-0.00599422	0.00912084	32	0.00410422	-0.0050508	-2.16884e-05	-0.00717647	0.00237486	32	0.00428519	0.00497671	0.00688258	0.00459577	0.00268017	32	0.00373964	0.0050807	0.0104464	0.00518897	0.00853836
33	0.0102691	0.0148774	0.0115732	0.00799029	-0.00137518	33	0.00167654	0.0106478	0.00633376	0.00733553	0.00469936	33	0.00251552	-0.00249393	-0.00127811	-0.0058858	0.0110201	33	-0.000227611	-0.00670308	-0.00160013	-0.00690295	-0.00110313	33	0.00331028	0.003906	0.00627404	0.00543561	0.00280762	33	0.00585383	0.00559222	0.0114358	0.00663242	0.00841597
34	0.00969798	0.013848	0.0121075	0.00824172	0.000854245	34	0.00220009	0.0119886	0.00570182	0.00484726	0.00455366	34	0.00593028	-0.00677319	-0.00225867	-0.00576293	0.00894339	34	0.00180644	-0.00557346	-0.00321471	-0.00737407	0.000505802	34	0.00371427	0.00456817	0.00675436	0.00486486	0.00190497	34	0.00393795	0.00444691	0.0107166	0.00769531	0.00821316
35	0.00947143	0.0153545	0.0106555	0.00647017	-0.00276188	35	-0.000208214	0.0103	0.00515605	0.00610037	0.0031025	35	0.00577441	-0.00444352	-0.00217435	-0.00722294	0.00862925	35	0.000803262	-0.0059215	-0.00106635	-0.00942483	-0.000955003	35	0.00200372	0.00335549	0.00657767	0.00491505	0.00104857	35	0.00505206	0.00532065	0.0111157	0.00586462	0.00907212
36	0.0116889	0.0166189	0.0113867	0.00785724	-0.00330692	36	0.00132029	0.0116732	0.00304719	0.00446906	0.00303853	36	0.00391356	-0.00567729	-0.00298025	-0.00725546	0.00874315	36	0.00160291	-0.00874556	-0.000960316	-0.0105081	0.000391395	36	0.00221654	0.00487072	0.0065155	0.0044912	0.000606081	36	0.00506992	0.00590645	0.0134458	0.0062989	0.00977307
37	0.0111252	0.0157064	0.0110546	0.0072779	-0.0034914	37	0.00370332	0.0109619	0.00331409	0.00535353	0.000498722	37	0.00274333	-0.00669765	-0.00129015	-0.00892387	0.0110596	37	0.000745456	-0.00414637	-0.00356534	-0.00883804	-0.00343705	37	0.00115748	0.00519132	0.00750731	0.00360112	0.00126446	37	0.00686072	0.00534745	0.0103674	0.0073142	0.00880177
38	0.00929603	0.0145224	0.011372	0.00757123	-0.00496825	38	0.00265383	0.010253	0.00381677	0.0033093	0.00369363	38	0.00361021	-0.0102071	-0.0036199	-0.00880943	0.00979348	38	0.000427523	-0.00829395	-0.0051992	-0.0112961	-0.00338406	38	0.0012837	0.00412579	0.00549384	0.00332987	-0.000138509	38	0.00680928	0.00461385	0.0121299	0.00829634	0.00989491
39	0.00870407	0.0138344	0.0113899	0.00425757	-0.00615266	39	0.00179088	0.00904226	0.00469287	0.00177494	0.00262155	39	0.00335242	-0.00864244	-0.00340548	-0.00932622	0.00896737	39	-0.000928508	-0.00764725	-0.00223511	-0.0102309	-0.00213762	39	0.000824661	0.00318881	0.00507648	0.00461587	-0.00139947	39	0.00650617	0.00496611	0.0112766	0.00681281	0.00774834
40	0.0108318	0.013516	0.0114024	0.00237289	-0.00625119	40	0.000988114	0.0127179	0.0032734	0.00138476	0.00193447	40	0.0037445	-0.00811248	-0.00225145	-0.00897687	0.00866042	40	0.000132472	-0.00898883	-0.00362318	-0.0109876	-0.00333227	40	0.000252859	0.00398413	0.00574836	0.00368422	-0.00240999	40	0.00654906	0.00594567	0.012769	0.00752122	0.00744485

## Sheet: Figure5F_withSec18_Sec17 KEKE 
	Replicate 1						Replicate 2						Replicate 3						Replicate 4						Average						Stdev
	100nM	500nM	1000nM	2000nM	0nM		100nM	500nM	1000nM	2000nM	0nM		100nM	500nM	1000nM	2000nM	0nM		100nM	500nM	1000nM	2000nM	0nM		100nM	500nM	1000nM	2000nM	0nM		100nM	500nM	1000nM	2000nM	0nM
Time (min)	KEKE	KEKE	KEKE	KEKE	Buffer	Time (min)	KEKE	KEKE	KEKE	KEKE	Buffer	Time (min)	KEKE	KEKE	KEKE	KEKE	Buffer	Time (min)	KEKE	KEKE	KEKE	KEKE	Buffer	Time (min)	KEKE	KEKE	KEKE	KEKE	Buffer	Time (min)	KEKE	KEKE	KEKE	KEKE	Buffer
0	0.00524601	0.00785486	0.00414995	0	0.00135306	0	0	0.0744481	0	0.022771	0.018044	0	0.0112495	0.00319748	0.00847098	0	0.0179689	0	0.0130325	0	0.0142984	0	0.0203057	0	0.0144179	0.00609284	0.0274343	0.00614946	0.00759032	0	0.00877715	0.0065574	0.0409041	0.00735593	0.0131468
1	0.00491793	0.00666625	0.00473421	-0.000611683	0.00721528	1	-0.000166125	0.0731299	-0.000352184	0.02288	0.0172539	1	0.00956722	0.00473434	0.00595546	0.00208267	0.0221216	1	0.0110256	0.00129677	0.0118757	-0.00100877	0.0197731	1	0.016591	0.00525913	0.027031	0.00541925	0.00708651	1	0.00655889	0.00560365	0.040013	0.00614266	0.013679
2	0.00273358	0.00813367	0.00510544	-0.00101771	0.00713385	2	-0.00296516	0.0741481	0.0010841	0.025392	0.0157494	2	0.00931488	0.00731059	0.0043404	-0.0016918	0.0208455	2	0.012152	0.000987276	0.0115697	-0.000518726	0.0186659	2	0.0155987	0.00397348	0.0277564	0.00591976	0.00795185	2	0.00601701	0.00763447	0.040335	0.00529003	0.0151057
3	0.00497873	0.0082018	0.00615585	0.000227799	0.00959776	3	-0.00287911	0.0738529	0.00352903	0.0228991	0.0152922	3	0.00943264	0.0110776	0.00578521	0.000532359	0.0201041	3	0.0121256	0.0101619	0.0142052	0.00248725	0.0156237	3	0.0151544	0.00474175	0.0307389	0.00796336	0.00853807	3	0.00430563	0.00750517	0.0373507	0.00556286	0.0124883
4	0.00417794	0.014171	0.00716407	0.00244779	0.00615455	4	0.00146167	0.0761655	0.00566848	0.0146995	0.0173119	4	0.00710752	0.0206689	0.0062732	0.000782951	0.0190611	4	0.00947809	0.0156117	0.017412	0.00414741	0.0162463	4	0.0146935	0.00503923	0.0353161	0.0100815	0.00709823	4	0.00580968	0.00407702	0.035384	0.00639225	0.00663751
5	0.00404797	0.013975	0.0090856	0.00576458	0.00854538	5	-0.000316714	0.077534	0.00670946	0.0127361	0.0165964	5	0.0127695	0.0280816	0.0075957	0.00083211	0.0170568	5	0.0106693	0.0252769	0.0179235	0.00693347	0.013468	5	0.0139167	0.00480018	0.0389286	0.0112395	0.00847806	5	0.00391978	0.0055315	0.0339074	0.00590917	0.00373362
6	0.00276503	0.0204379	0.0130921	0.00253743	0.00723616	6	0.00120232	0.0759205	0.0108758	0.0162987	0.0140507	6	0.00849178	0.0394633	0.00779834	-0.000141483	0.0183065	6	0.00800497	0.0332675	0.0236677	0.00899164	0.0150503	6	0.0136609	0.00399077	0.0432086	0.0158785	0.00927592	6	0.00465265	0.00356312	0.0290465	0.00683606	0.00688503
7	0.00325871	0.0219106	0.0131733	0.00475109	0.00755355	7	-0.00232576	0.0773726	0.0132764	0.0193462	0.016138	7	0.00943744	0.0492996	0.00440275	0.00117982	0.0173825	7	0.0101295	0.0424445	0.0264287	0.0140223	0.0148247	7	0.0139747	0.00368748	0.0472426	0.0176261	0.0127065	7	0.00440631	0.00623868	0.0280406	0.00762342	0.00738597
8	0.00570929	0.0265948	0.0176281	0.00946315	0.00737711	8	0.00155728	0.0807728	0.0168294	0.017148	0.0131824	8	0.00890633	0.0605767	0.00530201	0.00217979	0.0165233	8	0.00885189	0.0554242	0.0335594	0.0169865	0.0131141	8	0.0125492	0.00537282	0.0542639	0.0226723	0.0145325	8	0.00379756	0.00365893	0.0271076	0.00943697	0.00439096
9	0.00526697	0.0320399	0.0180014	0.0105072	0.00589876	9	0.000121905	0.0803258	0.0238515	0.0164844	0.0155729	9	0.00661606	0.070478	0.00243278	0.000291359	0.0174414	9	0.0106309	0.0639582	0.0369921	0.0217817	0.0143017	9	0.0133037	0.00533993	0.0587747	0.0262816	0.0162578	9	0.00510225	0.00525488	0.0245567	0.00972577	0.00564064
10	0.00368321	0.0382167	0.0206664	0.0107287	0.00749508	10	0.00179989	0.0790112	0.0274955	0.0199235	0.014489	10	0.0100455	0.0824352	0.0056665	-0.00161866	0.0176468	10	0.00783103	0.0735263	0.0456849	0.0251403	0.0147264	10	0.0135893	0.00443804	0.0635847	0.0312823	0.0185975	10	0.00430912	0.00308561	0.0221398	0.012932	0.00729671
11	0.0059881	0.0413423	0.0254355	0.0133948	0.00711401	11	0.00157162	0.0785857	0.0279232	0.0216953	0.0139263	11	0.00750285	0.0907287	0.00436318	0.00184407	0.0172046	11	0.00780944	0.0826001	0.0488642	0.0316781	0.0115654	11	0.0124526	0.00512305	0.0675094	0.0340743	0.0222561	11	0.00424427	0.00320762	0.0227501	0.0128687	0.00915455
12	0.00514748	0.0464835	0.029134	0.0173707	0.0076924	12	0.00105531	0.0828261	0.033491	0.0249547	0.0147141	12	0.00894118	0.0983842	0.00392914	0.00167261	0.0144482	12	0.00993514	0.0945529	0.0552132	0.0311438	0.0142753	12	0.0127825	0.00537931	0.0746208	0.0392794	0.0244898	12	0.00339819	0.00444445	0.0250632	0.01397	0.00689832
13	0.00554787	0.0504371	0.0299408	0.020234	0.00767988	13	0.00220505	0.0855618	0.0384647	0.026645	0.0124491	13	0.0111738	0.111758	0.00242799	0.00451186	0.0128632	13	0.0109368	0.101873	0.0612323	0.0401008	0.0122528	13	0.0113112	0.00622991	0.0792906	0.0432126	0.0289933	13	0.00243425	0.00440565	0.0262851	0.016177	0.0101394
14	0.00484037	0.0570279	0.0337839	0.0201687	0.0104413	14	0.00203892	0.0867904	0.0425029	0.0281879	0.01241	14	0.0118815	0.122958	0.00356584	0.00222056	0.0128356	14	0.00938452	0.112421	0.0682327	0.0436208	0.0125395	14	0.0120566	0.00542127	0.0854131	0.0481731	0.0306591	14	0.00109148	0.00370709	0.0277223	0.0179108	0.0119197
15	0.00555416	0.0607101	0.0355008	0.0226323	0.00859444	15	0.00234966	0.0873569	0.045833	0.0304471	0.0113841	15	0.0106114	0.125919	0.00441474	0.000525165	0.012683	15	0.00985236	0.118652	0.0738861	0.0479498	0.0137571	15	0.0116047	0.00591873	0.0889063	0.05174	0.0336764	15	0.00222903	0.00376462	0.0290019	0.0198627	0.012964
16	0.00717566	0.0671395	0.0391878	0.0224836	0.00517943	16	0.000536621	0.0891843	0.05303	0.0287988	0.0104388	16	0.0102521	0.135042	0.00549624	0.00358623	0.0165366	16	0.00981638	0.124801	0.0801443	0.0539965	0.013354	16	0.0113772	0.00584288	0.0937082	0.057454	0.0350929	16	0.00482423	0.00478128	0.0290958	0.0208336	0.0166727
17	0.00426703	0.0716591	0.042069	0.0268571	0.00686345	17	0.00407665	0.0918662	0.0546484	0.0329064	0.0128768	17	0.0103639	0.143138	0.00582357	0.00330686	0.0151403	17	0.00743276	0.134562	0.083914	0.0581965	0.0124687	17	0.0118373	0.00525881	0.0993625	0.0602105	0.03932	17	0.00351796	0.0018851	0.0321146	0.0214698	0.016625
18	0.00496405	0.0762374	0.0467642	0.0307371	0.00831256	18	0.00272016	0.0950692	0.0623426	0.0362893	0.0112088	18	0.0126662	0.149884	0.00342316	-0.000876474	0.0153926	18	0.0106729	0.143059	0.0880877	0.0592853	0.0115666	18	0.0116201	0.00611903	0.104789	0.0657315	0.0421039	18	0.00290653	0.00410024	0.0344548	0.0208692	0.0151363
19	0.00714316	0.0793672	0.0507802	0.0318645	0.00769032	19	0.00111388	0.0915925	0.0634854	0.0371494	0.0126173	19	0.0138654	0.156424	0.00384521	0.000454423	0.0159141	19	0.00682096	0.147684	0.0941068	0.0640746	0.0147911	19	0.0127532	0.005026	0.106214	0.0694575	0.0443628	19	0.00364215	0.00339183	0.0364298	0.0222722	0.0172742
20	0.00823115	0.0848564	0.051491	0.0346012	0.00625164	20	0.00260542	0.0964412	0.068689	0.0376513	0.0102315	20	0.0133379	0.169674	0.00641348	0.00184407	0.0167889	20	0.0119145	0.153702	0.101702	0.067904	0.0133156	20	0.0116469	0.00758369	0.111667	0.0739608	0.0467189	20	0.00448467	0.00468819	0.0368617	0.0255175	0.0184102
21	0.0070635	0.0895647	0.0570394	0.035544	0.0046334	21	0.0032998	0.0937653	0.0754488	0.0389379	0.0088692	21	0.0117109	0.174391	0.00304188	-0.00019304	0.016396	21	0.00901384	0.161679	0.104705	0.0741789	0.0158156	21	0.0114285	0.00645905	0.115003	0.0790644	0.0495536	21	0.00567585	0.00290458	0.0404773	0.0240375	0.0213936
22	0.0061275	0.0946912	0.0573927	0.0391393	0.00830629	22	0.00384957	0.100035	0.0807184	0.0432264	0.0117514	22	0.0111005	0.177036	0.00251791	0.00206349	0.0153241	22	0.00916259	0.171648	0.111256	0.0799937	0.0145404	22	0.0124806	0.00637989	0.122125	0.0831223	0.0541198	22	0.00317727	0.00266549	0.0429716	0.0270119	0.0225005
23	0.00834225	0.100107	0.0623832	0.036701	0.00652936	23	0.00358066	0.100161	0.0841911	0.0441572	0.00908006	23	0.0112675	0.185297	0.00581758	0.0025359	0.0155909	23	0.0110232	0.175815	0.113781	0.0824905	0.013907	23	0.0112768	0.0076487	0.125361	0.0867852	0.0544495	23	0.00419894	0.00376942	0.0436949	0.0257971	0.0245687
24	0.00494099	0.105224	0.0669075	0.0412791	0.00742931	24	0.00274406	0.1007	0.0861797	0.0468297	0.00936319	24	0.0135842	0.191519	0.00552262	0.000612692	0.0165666	24	0.00907382	0.179565	0.121222	0.0887594	0.0136143	24	0.0117434	0.00558629	0.128496	0.0914363	0.0589561	24	0.00412474	0.00321384	0.0442849	0.0275359	0.0259592
25	0.0064409	0.105164	0.0691782	0.0425984	0.00806095	25	0.00317192	0.100629	0.0921871	0.049416	0.00977662	25	0.0132321	0.192449	0.00376488	0.000499986	0.014775	25	0.00961604	0.189441	0.126051	0.0879156	0.0129557	25	0.0113921	0.00640962	0.131745	0.0958056	0.0599767	25	0.00303289	0.00322217	0.0500176	0.0286088	0.0244348
26	0.00822067	0.114553	0.0719392	0.0430635	0.00892749	26	0.00212258	0.105448	0.0967404	0.0480971	0.00806959	26	0.0125027	0.199158	0.00630797	0.000904051	0.0169127	26	0.0108708	0.18952	0.134478	0.0951443	0.0126942	26	0.011651	0.00707136	0.136507	0.101052	0.0621016	26	0.00404217	0.00448594	0.0461358	0.0314915	0.0287263
27	0.00836531	0.118044	0.0758877	0.047455	0.00483699	27	0.000714698	0.106479	0.0991278	0.0521807	0.0075223	27	0.0121363	0.204513	0.00766884	0.00224934	0.0157988	27	0.00905942	0.195352	0.13851	0.0978503	0.0112871	27	0.00986129	0.00604648	0.139959	0.104509	0.0658287	27	0.00476099	0.00463048	0.0483196	0.0316563	0.027832
28	0.00501856	0.122058	0.0762125	0.0481352	0.00768614	28	0.000539011	0.111054	0.104578	0.0502018	0.00867611	28	0.0137981	0.206981	0.0032601	-0.000303349	0.0158072	28	0.00728281	0.200386	0.137661	0.103066	0.0118041	28	0.0109934	0.00428013	0.1445	0.10615	0.0671344	28	0.00365775	0.00343201	0.0487107	0.0307542	0.031135
29	0.00666206	0.124125	0.0779263	0.0507064	0.00445069	29	0.00244049	0.107345	0.110331	0.0532708	0.00552148	29	0.0145659	0.21145	0.00515213	-0.00127095	0.01878	29	0.00773866	0.204806	0.143541	0.102796	0.0105397	29	0.00982297	0.00561374	0.145425	0.110599	0.0689244	29	0.00653466	0.00280034	0.0521054	0.0328083	0.0293617
30	0.00849214	0.131442	0.0828767	0.0511103	0.00411556	30	0.00241898	0.112193	0.11154	0.0539584	0.00695487	30	0.0152136	0.213115	0.00395912	-0.00271695	0.0137536	30	0.00715805	0.210355	0.152074	0.110467	0.0130373	30	0.00946534	0.00602305	0.15133	0.115497	0.0718452	30	0.00469294	0.0031917	0.052015	0.0347678	0.0334777
31	0.00704254	0.130549	0.0832795	0.0515659	0.00350898	31	-0.000855725	0.113651	0.115966	0.0556582	0.00903623	31	0.0118383	0.221249	0.00343515	-0.00497588	0.0134941	31	0.00714725	0.210352	0.150769	0.10942	0.011557	31	0.00939907	0.00444469	0.151517	0.116671	0.0722147	31	0.00433015	0.00459059	0.0516481	0.0337501	0.0322856
32	0.00726265	0.135596	0.08493	0.0562569	0.00406023	32	0.00413999	0.0911909	0.119436	0.0565183	0.00827097	32	0.0125532	0.221553	0.00536076	-0.00364018	0.0118539	32	0.00710047	0.219368	0.155851	0.113457	0.010217	32	0.00860053	0.0061677	0.148719	0.120072	0.0754109	32	0.00336256	0.00175792	0.0650885	0.0354646	0.0329496
33	0.00957383	0.141046	0.0899775	0.0547888	0.00325006	33	0.00136844	0.0916439	0.120436	0.0587512	0.00567075	33	0.0130098	0.220892	0.00251552	-0.00249393	0.0135962	33	0.00811174	0.218622	0.162353	0.119293	0.0121676	33	0.00867116	0.00635134	0.150437	0.124255	0.0776109	33	0.00499573	0.0043768	0.064008	0.0363385	0.0361517
34	0.00670713	0.14369	0.0892761	0.056453	0.00177485	34	0.00289823	0.0965093	0.124338	0.0592532	0.00601428	34	0.0134484	0.229087	0.00593028	-0.00677319	0.0154443	34	0.00430659	0.219085	0.165501	0.123981	0.0102374	34	0.00836772	0.00463732	0.153095	0.126372	0.0798959	34	0.00584746	0.00192587	0.0618268	0.0381531	0.0382048
35	0.0102111	0.145353	0.0952569	0.059927	0.00245869	35	0.00146167	0.0988231	0.128787	0.0605074	0.00810513	35	0.0137032	0.224898	0.00577441	-0.00444352	0.0124066	35	0.00483801	0.222365	0.167381	0.122607	0.00923217	35	0.00805065	0.00550359	0.155514	0.130475	0.0810137	35	0.00414903	0.00441253	0.0623946	0.0360917	0.0360219
36	0.00514224	0.149836	0.097769	0.0601864	0.000990783	36	-0.000395594	0.0984263	0.132166	0.0605876	0.00500499	36	0.0118959	0.231453	0.00391356	-0.00567729	0.0117481	36	0.0039455	0.223619	0.173526	0.127188	0.00993514	36	0.00691976	0.00289738	0.157294	0.134487	0.0826541	36	0.00487254	0.0029139	0.0629284	0.0379316	0.0385682
37	0.00852044	0.152465	0.0989291	0.0621733	-0.00072038	37	0.000493596	0.100076	0.134271	0.0661435	0.0030101	37	0.0144169	0.230543	0.00274333	-0.00669765	0.0125965	37	0.00277589	0.225013	0.173699	0.12878	0.0137715	37	0.00716442	0.00392997	0.159185	0.135633	0.085699	37	0.00713183	0.004136	0.0627389	0.0374035	0.0373622
38	0.00819446	0.156656	0.0994396	0.061202	-0.000207762	38	-0.000190028	0.100875	0.139044	0.0664106	0.00388553	38	0.0157964	0.234945	0.00361021	-0.0102071	0.0110344	38	0.00109764	0.226634	0.174038	0.130469	0.0101175	38	0.00620741	0.00303402	0.161389	0.137507	0.0860272	38	0.00532709	0.00451521	0.063013	0.0373231	0.0385757
39	0.00628787	0.15761	0.101886	0.0679316	-0.00051053	39	-0.00152501	0.105021	0.141048	0.0670551	0.00552622	39	0.0128428	0.235801	0.00335242	-0.00864244	0.0163467	39	0.00287186	0.226824	0.180653	0.132319	0.00769547	39	0.00726447	0.00254491	0.163152	0.141196	0.089102	39	0.00697961	0.00391669	0.0610902	0.0393834	0.0374298
40	0.00690838	0.161371	0.102912	0.0668696	0.00034975	40	-0.00379937	0.105775	0.14335	0.0672935	0.00390804	40	0.0154815	0.236515	0.0037445	-0.00811248	0.0145431	40	-0.000391072	0.223132	0.184648	0.131523	0.00802057	40	0.00670536	0.000905978	0.163426	0.143637	0.0885621	40	0.00609312	0.00547044	0.0587051	0.0408687	0.037206

## Sheet: Figure5G_without 18_Sec17 LALA
	Replicate 1						Replicate 2						Replicate 3						Replicate 4						Average						Stdev
	100nM	500nM	1000nM	2000nM	0nM		100nM	500nM	1000nM	2000nM	0nM		100nM	500nM	1000nM	2000nM	0nM		100nM	500nM	1000nM	2000nM	0nM		100nM	500nM	1000nM	2000nM	0nM		100nM	500nM	1000nM	2000nM	0nM
Time (min)	LALA	LALA	LALA	LALA	Buffer	Time (min)	LALA	LALA	LALA	LALA	Buffer	Time (min)	LALA	LALA	LALA	LALA	Buffer	Time (min)	LALA	LALA	LALA	LALA	Buffer	Time (min)	LALA	LALA	LALA	LALA	Buffer	Time (min)	LALA	LALA	LALA	LALA	Buffer
0	0.00135306	0.00847647	0.00596207	0.00903268	0	0	0.00339642	0.00199548	0.0469825	0.0204255	0.0190178	0	0.00707653	0.00981507	0.00747591	0.01082	0.018388	0	0.0076894	0.0117972	0.0125516	0.0179147	0.0182017	0	0.0139019	0.00414629	0.00742306	0.0218321	0.015791	0	0.00927448	0.00323404	0.00498506	0.0220287	0.00598597
1	0.00721528	0.0120899	0.00760685	0.0142656	0.00278075	1	0.00238543	0.00408605	0.0478586	0.0227103	0.0165846	1	0.00396272	0.0073547	0.00600988	0.0165937	0.015159	1	0.00812656	0.0131027	0.00946821	0.0190039	0.0150536	1	0.0123945	0.00590909	0.00975953	0.0216446	0.0186599	1	0.00644709	0.00308541	0.00493941	0.0227211	0.00423286
2	0.00713385	0.0105061	0.00552521	0.0148743	0.00260781	2	0.00293666	0.00325801	0.0257815	0.0230071	0.0192215	2	0.00508858	0.00272774	0.00303084	0.0300157	0.0153245	2	0.00738953	0.0109518	0.00797894	0.0269708	0.00902616	2	0.011545	0.00582001	0.00823863	0.0130952	0.0216174	2	0.00728999	0.00250033	0.0043191	0.0110549	0.00616684
3	0.00959776	0.0118706	0.00862934	0.0228719	0.00337296	3	0.00216518	0.00113374	0.0258832	0.0219755	0.0196196	3	0.00497348	0.00440875	0.0051546	0.0406935	0.0164887	3	0.0072691	0.00974512	0.00746685	0.0344858	0.00716192	3	0.0116608	0.00634401	0.00758316	0.0139931	0.0264444	3	0.00765026	0.00380166	0.00568556	0.0103135	0.0069785
4	0.00615455	0.013207	0.0103516	0.0223753	0.00477119	4	0.00378757	0.000148037	0.029141	0.024666	0.0171722	4	0.00629358	0.0068811	0.00421258	0.0557091	0.0164216	4	0.00373451	0.00810608	0.00665112	0.0450324	0.00908999	4	0.0118637	0.00455888	0.00715369	0.0153813	0.0306912	4	0.0059708	0.00138215	0.00658135	0.0120591	0.0124725
5	0.00854538	0.00949649	0.0109373	0.0235235	0.00624594	5	0.00240349	0.00249014	0.0169235	0.0254308	0.0180973	5	0.00480082	0.00668446	0.00511605	0.0661545	0.0131555	5	0.00427042	0.00840956	0.00808256	0.0572189	0.00661758	5	0.0110291	0.00507309	0.00679873	0.0119811	0.0353911	5	0.00568101	0.00314864	0.00377072	0.00451197	0.0189275
6	0.00723616	0.0121786	0.0117041	0.0288968	0.0037723	6	0.00285121	0.00185708	0.0164496	0.0278915	0.0151844	6	0.00776357	0.00512935	0.00876847	0.0794571	0.0145703	6	0.00399584	0.00521338	0.0106141	0.0647677	0.00600821	6	0.0098838	0.0046944	0.00641635	0.0129226	0.0405187	6	0.00584324	0.00227441	0.00526486	0.0031027	0.0210063
7	0.00755355	0.0109769	0.0115742	0.0307176	0.00432468	7	0.00201354	0.00210621	0.0172383	0.0311434	0.0139168	7	0.00240401	0.00788107	0.0105598	0.0868716	0.0135128	7	0.00230742	0.00877928	0.00969835	0.0764939	0.0067368	7	0.00962278	0.00395817	0.00728747	0.012837	0.0461183	7	0.00482942	0.00311715	0.00461969	0.00392538	0.0263069
8	0.00737711	0.0130702	0.0164091	0.0354529	0.00460349	8	0.000605385	0.00290537	0.0180785	0.027323	0.0151216	8	0.00466054	0.00781752	0.00925755	0.0963038	0.0154984	8	0.000958616	0.00772914	0.0122251	0.085291	0.00524589	8	0.0101173	0.00298037	0.00790157	0.0155709	0.0493556	8	0.00600365	0.00381178	0.00508461	0.0030154	0.0313853
9	0.00589876	0.0115605	0.0174514	0.0379358	0.0044274	9	0.00174876	-0.000137205	0.0188888	0.0315527	0.0141241	9	0.00463056	0.0056761	0.00950571	0.104397	0.0147322	9	0.00197865	0.0065104	0.00955858	0.0945026	0.00626111	9	0.00988621	0.00320872	0.00597791	0.0152996	0.0546637	9	0.00530357	0.00233248	0.00586702	0.00502354	0.0346488
10	0.00749508	0.014274	0.0178202	0.043638	0.00377964	10	0.00296795	0.00399458	0.0189402	0.0325401	0.0135212	10	0.00665808	0.00324091	0.00926237	0.113145	0.0145164	10	0.00160773	0.00596485	0.0114768	0.102427	0.00578421	10	0.00940035	0.00402359	0.0080778	0.0160791	0.0595351	10	0.0054106	0.00308237	0.00545571	0.00402484	0.0375579
11	0.00711401	0.0131401	0.0198579	0.0451309	0.00442635	11	0.00216398	0.000990521	0.0223668	0.0358662	0.0135698	11	0.00443273	0.00473008	0.00945632	0.117443	0.0120009	11	0.00283249	0.00411145	0.00980679	0.112561	0.00385132	11	0.00846207	0.00403683	0.00608071	0.0173438	0.0645192	11	0.00503843	0.0026858	0.00630966	0.00664672	0.0418622
12	0.0076924	0.0129574	0.0198474	0.0468417	0.0044295	12	0.00295471	0.00382006	0.0205285	0.0366597	0.0148089	12	0.0064003	0.00558977	0.0101478	0.124122	0.013556	12	0.00368634	0.00605638	0.0118118	0.117077	0.00517243	12	0.00949169	0.00477782	0.0076113	0.0173959	0.0668593	12	0.00544893	0.00255048	0.00476301	0.00484795	0.0437864
13	0.00767988	0.0119395	0.0221511	0.0535099	0.006443	13	0.0037647	0.00341567	0.0215518	0.0390462	0.0125711	13	0.00379126	0.00762568	0.0101201	0.126342	0.0102995	13	0.00338888	0.00339249	0.0139722	0.121563	0.00663805	13	0.00898791	0.00494448	0.00624922	0.019225	0.0713729	13	0.00297534	0.00237636	0.00492795	0.00455896	0.044063
14	0.0104413	0.0117391	0.0257518	0.0531212	0.00615161	14	0.00380683	0.00178125	0.0252872	0.0379942	0.0123946	14	0.00654298	0.00804773	0.0120728	0.135587	0.0108018	14	0.00486534	0.00367429	0.0133709	0.130907	0.00652605	14	0.00896853	0.00637116	0.00573153	0.02147	0.0740073	14	0.00310912	0.00356438	0.00528807	0.00701783	0.0498533
15	0.00859444	0.0134857	0.0265019	0.056437	0.00494099	15	0.00211102	0.00182217	0.0247486	0.0406213	0.0105679	15	0.00489554	0.00753456	0.0133473	0.13739	0.0112934	15	0.00181968	0.00414156	0.0144879	0.130601	0.00792664	15	0.00868225	0.00417505	0.00648315	0.0219128	0.0758863	15	0.0028834	0.00383008	0.00617429	0.00648965	0.0480393
16	0.00517943	0.0113319	0.029648	0.0606987	0.00529946	16	0.00449646	0.00297156	0.0245607	0.0415584	0.0100988	16	0.00688469	0.00392914	0.0123932	0.140247	0.0123833	16	0.00386337	0.00525673	0.0134119	0.137444	0.00467506	16	0.00811417	0.00451308	0.00652006	0.0225402	0.0799005	16	0.00373786	0.000658188	0.00432097	0.00830448	0.0507451
17	0.00686345	0.0115793	0.0297119	0.0609491	0.00573654	17	0.00313645	0.00314608	0.0258425	0.0445206	0.00895686	17	0.00209706	0.00595666	0.0146699	0.14663	0.0119913	17	0.00153306	0.00476658	0.0149313	0.141401	0.00364539	17	0.00758251	0.00384432	0.00649733	0.0234952	0.0822904	17	0.00366217	0.00273479	0.0044751	0.00766477	0.0518465
18	0.00831256	0.0123279	0.0293787	0.0657106	0.00442635	18	0.00491168	0.00628132	0.0251364	0.0470651	0.0123579	18	0.00303349	0.00745902	0.0154469	0.147926	0.0127083	18	0.00289632	0.00528443	0.0164314	0.145231	0.00556623	18	0.00876469	0.00537352	0.00796455	0.0236488	0.0860021	18	0.00437852	0.00273749	0.0038115	0.00660059	0.0521337
19	0.00769032	0.0146488	0.0303226	0.0698645	0.00337086	19	0.00415465	0.00334587	0.0246624	0.0463075	0.0102291	19	0.00331765	0.00484399	0.0146543	0.155526	0.0139145	19	0.00467626	0.00340453	0.0132721	0.148314	0.000893584	19	0.00710201	0.00550708	0.00713306	0.0227524	0.088162	19	0.00601815	0.00190864	0.00650886	0.00868425	0.0534082
20	0.00625164	0.0120731	0.0304159	0.0709194	0.00381004	20	0.00487076	0.00257198	0.029469	0.0526748	0.0105442	20	0.00689668	0.00576722	0.0137906	0.156615	0.00991458	20	0.00311189	0.00390792	0.0144433	0.150843	0.00414397	20	0.00710321	0.00474477	0.00618435	0.0247761	0.0914791	20	0.00362154	0.00157367	0.00514341	0.00896094	0.0522138
21	0.0046334	0.0114154	0.0376665	0.0755856	0.00553215	21	-0.000324958	0.000537986	0.0264026	0.0503948	0.00777699	21	0.0048308	0.00584036	0.0170262	0.155523	0.0110848	21	0.00416564	0.00255189	0.0176375	0.155584	0.00614068	21	0.00763366	0.00282469	0.0048351	0.0272356	0.0938549	21	0.00248839	0.00273769	0.005787	0.0100405	0.0549231
22	0.00830629	0.0138313	0.0367677	0.0771664	0.00377859	22	0.0031208	0.00162599	0.0292332	0.0571079	0.00949823	22	0.00573005	0.00632476	0.0151301	0.160865	0.0129637	22	0.00244712	0.0020762	0.0167242	0.157291	0.00506886	22	0.00782734	0.00462474	0.0058445	0.027575	0.0971883	22	0.00421011	0.00320606	0.00692043	0.0101241	0.0530075
23	0.00652936	0.0131287	0.0385026	0.0821469	0.00473346	23	0.00504407	0.00280066	0.0280351	0.0574826	0.0101427	23	0.00707294	0.004338	0.0185705	0.160429	0.0101028	23	0.00336599	0.00419695	0.0201558	0.165529	0.0044631	23	0.00736051	0.00497981	0.00670876	0.0288978	0.101719	23	0.0031915	0.00158266	0.00560346	0.00920375	0.0566198
24	0.00742931	0.00955078	0.0404606	0.0829064	0.00377964	24	0.00435324	0.00399338	0.0295647	0.0581217	0.0107575	24	0.00562334	0.00730674	0.0157975	0.167959	0.0119937	24	0.00338285	0.00262174	0.0175363	0.163502	0.00483041	24	0.0078403	0.00505513	0.00538863	0.0291872	0.10151	24	0.00413557	0.00211257	0.00366919	0.0114668	0.0550983
25	0.00806095	0.0145308	0.0411143	0.0878209	0.00275559	25	0.00431593	-0.000211825	0.03181	0.061887	0.00687787	25	0.00209466	0.0044615	0.0212725	0.172399	0.00850095	25	0.00243146	0.00417046	0.0163953	0.172468	0.00329976	25	0.00535854	0.00493611	0.00616314	0.0297732	0.107392	25	0.00278071	0.00286553	0.00757062	0.0124848	0.0578299
26	0.00892749	0.0107984	0.038777	0.0912351	0.00330378	26	0.00337957	0.00200391	0.0294821	0.0598619	0.00532839	26	0.00418453	0.00328048	0.0175357	0.17035	0.0122574	26	0.00164265	0.00232308	0.0174014	0.174775	0.00176067	26	0.00566257	0.0046499	0.00504179	0.0285535	0.108624	26	0.00463295	0.00380493	0.00498791	0.0107181	0.0593973
27	0.00483699	0.0132143	0.0404972	0.0956729	0.00159005	27	0.0030197	0.00279584	0.0334545	0.0648791	0.00810394	27	0.0030107	0.00391236	0.0173864	0.177912	0.0110812	27	0.00210631	0.00206175	0.0163326	0.173645	0.000862272	27	0.00540937	0.003321	0.00602395	0.0300948	0.111399	27	0.00498979	0.00139005	0.00623781	0.0124277	0.0560623
28	0.00768614	0.0137676	0.0430524	0.0978603	0.00322307	28	0.00170784	-0.00103385	0.0311553	0.0679371	0.00724984	28	0.00429484	0.00564612	0.0204823	0.178031	0.0123114	28	0.000454018	0.00277107	0.0169266	0.177126	0.00244712	28	0.00630786	0.00328266	0.00516828	0.0303781	0.114308	28	0.0045222	0.00386471	0.0076864	0.0130802	0.056422
29	0.00445069	0.014037	0.0389918	0.0988629	0.00209002	29	0.00257198	0.00155378	0.0357728	0.0677252	0.00596927	29	0.00441714	0.00509458	0.021452	0.183067	0.00883788	29	0.003873	0.00261211	0.0164362	0.179243	0.00089238	29	0.00444739	0.00363189	0.00606762	0.0304003	0.115277	29	0.00364178	0.000962283	0.00692191	0.0121999	0.0575423
30	0.00411556	0.0140317	0.0411887	0.103826	0.00185838	30	0.00464089	0.00181616	0.0344622	0.0692488	0.00533905	30	0.00292318	0.00549385	0.0210304	0.18222	0.00890862	30	0.00203043	0.00372608	0.0139758	0.184412	-0.000531092	30	0.00389374	0.00359563	0.00652466	0.0298756	0.119162	30	0.00412148	0.00138071	0.00657109	0.0141744	0.0590936
31	0.00350898	0.0139597	0.0405433	0.107954	-6.07929e-05	31	0.00588897	0.00151286	0.0350954	0.0795849	0.00532958	31	0.0021678	0.00563293	0.0242299	0.181784	0.0122886	31	-0.00070451	0.00320823	0.0139686	0.184467	0.00244953	31	0.00500173	0.00289781	0.00622693	0.0298691	0.124002	31	0.00533382	0.00333896	0.00675022	0.0140371	0.0542516
32	0.00406023	0.0146582	0.0427402	0.107913	0.000515691	32	0.00273326	-0.000610199	0.0356376	0.0775191	0.00512938	32	0.00235964	0.00421691	0.0224145	0.183155	0.00912084	32	0.00280841	0.00248566	0.0156579	0.186287	0.00237486	32	0.00428519	0.00320063	0.00551121	0.0313452	0.123906	32	0.00373964	0.00074538	0.00807132	0.0140421	0.0561199
33	0.00325006	0.0132174	0.0411279	0.115219	-0.00137518	33	0.00198586	-0.00059696	0.0381545	0.0773372	0.00469936	33	0.00136567	0.00274093	0.0233866	0.184916	0.0110201	33	0.00313838	0.00360806	0.0135505	0.190114	-0.00110313	33	0.00331028	0.00279143	0.0054095	0.0309443	0.127556	33	0.00585383	0.000699882	0.00708118	0.0151367	0.0573917
34	0.00177485	0.012592	0.0451739	0.117036	0.000854245	34	0.00450007	-0.0020003	0.0390546	0.0869803	0.00455366	34	0.000792543	0.00220138	0.025408	0.188104	0.00894339	34	-0.000496168	0.000720166	0.0149771	0.190515	0.000505802	34	0.00371427	0.00192625	0.00377063	0.0330685	0.13151	34	0.00393795	0.00250156	0.00775971	0.0159636	0.0532634
35	0.00245869	0.0145673	0.0410452	0.113363	-0.00276188	35	0.00303054	-0.00292944	0.0377871	0.0823843	0.0031025	35	0.00148317	0.00314979	0.0244696	0.192291	0.00862925	35	0.000419093	0.00261692	0.012448	0.195466	-0.000955003	35	0.00200372	0.00196944	0.00475161	0.0304267	0.130404	35	0.00505206	0.00137275	0.00894158	0.0156551	0.0584351
36	0.000990783	0.0151864	0.0461419	0.122576	-0.00330692	36	0.00237701	-0.00483947	0.0386991	0.0888509	0.00303853	36	-0.00158629	0.00233566	0.0230108	0.190644	0.00874315	36	-0.000846617	0.00244953	0.0151903	0.202576	0.000391395	36	0.00221654	0.000840392	0.0042655	0.0333438	0.138001	36	0.00506992	0.00161707	0.0101357	0.0161558	0.0584106
37	-0.00072038	0.0123456	0.0459659	0.119988	-0.0034914	37	0.00286806	-0.00604543	0.0400192	0.0962391	0.000498722	37	-0.00354306	0.00163904	0.0205834	0.196543	0.0110596	37	0.000714145	0.00333227	0.0126926	0.199007	-0.00343705	37	0.00115748	0.000953941	0.00321083	0.0328926	0.138412	37	0.00686072	0.0018062	0.00919613	0.0177446	0.0538041
38	-0.000207762	0.0159538	0.0437868	0.125975	-0.00496825	38	0.00296193	-0.0047131	0.041726	0.0973666	0.00369363	38	-0.00239561	0.00152753	0.0230397	0.214714	0.00979348	38	-0.000268557	0.00205572	0.0144228	0.198489	-0.00338406	38	0.0012837	0.000828539	0.00443214	0.0333119	0.14061	38	0.00680928	0.00184782	0.0105364	0.0163908	0.0521257
39	-0.00051053	0.0125043	0.0434505	0.122033	-0.00615266	39	0.00347104	-0.00606348	0.0397152	0.0924415	0.00262155	39	-0.0029016	0.00238362	0.0226699	0.198905	0.00896737	39	-0.000432341	0.000767133	0.014653	0.209414	-0.00213762	39	0.000824661	0.000842722	0.00240266	0.0326062	0.141296	39	0.00650617	0.00227652	0.00939133	0.0156598	0.0608189
40	0.00034975	0.0145506	0.0424113	0.126295	-0.00625119	40	0.00408725	-0.00666405	0.0439964	0.0903721	0.00193447	40	-0.00318336	-0.000311742	0.0229927	0.200021	0.00866042	40	1.08386e-05	0.00164627	0.0129914	0.207076	-0.00333227	40	0.000252859	0.00148261	0.00317761	0.033133	0.141248	40	0.00654906	0.00226204	0.0106899	0.0174612	0.0597718

## Sheet: Figure5H_withSec18_Sec17 LALA 
	Replicate 1						Replicate 2						Replicate 3						Replicate 4						Average						Stdev
	100nM	500nM	1000nM	2000nM	0nM		100nM	500nM	1000nM	2000nM	0nM		100nM	500nM	1000nM	2000nM	0nM		100nM	500nM	1000nM	2000nM	0nM		100nM	500nM	1000nM	2000nM	0nM		100nM	500nM	1000nM	2000nM	0nM
Time (min)	LALA	LALA	LALA	LALA	Buffer	Time (min)	LALA	LALA	LALA	LALA	Buffer	Time (min)	LALA	LALA	LALA	LALA	Buffer	Time (min)	LALA	LALA	LALA	LALA	Buffer	Time (min)	LALA	LALA	LALA	LALA	Buffer	Time (min)	LALA	LALA	LALA	LALA	Buffer
0	0	0.00576799	0.00192786	0.00627608	0.00135306	0	0.0190232	0.00637492	0.0533726	0.033521	0.018044	0	0.0155032	0.00404342	0.00707653	0.00981507	0.0179689	0	0.0128622	0.00833126	0.00910877	0.0100291	0.0203057	0	0.0144179	0.0106284	0.00682472	0.0214698	0.0166087	0	0.00877715	0.0097063	0.00133953	0.027861	0.0147662
1	0.00278075	0.00519779	0.0130162	0.0289874	0.00721528	1	0.0177455	0.00905324	0.0436217	0.0474035	0.0172539	1	0.0145467	0.00599002	0.00396272	0.0073547	0.0221216	1	0.0132724	0.00228765	0.0152032	0.0405251	0.0197731	1	0.016591	0.0112662	0.00551289	0.023947	0.038972	1	0.00655889	0.00768146	0.00339378	0.0170738	0.00930574
2	0.00260781	0.00153345	0.0446012	0.0532354	0.00713385	2	0.022109	0.00931737	0.0652678	0.0665208	0.0157494	2	0.0138774	0.00784291	0.00508858	0.00272774	0.0208455	2	0.0100455	0.00586847	0.0363825	0.0877124	0.0186659	2	0.0155987	0.0115874	0.0055731	0.0487505	0.0691562	2	0.00601701	0.00984163	0.00390036	0.014883	0.0173889
3	0.00337296	0.00485505	0.0785253	0.0792382	0.00959776	3	0.0206067	0.00977391	0.0878603	0.088379	0.0152922	3	0.0167649	0.0156281	0.00497348	0.00440875	0.0201041	3	0.0116722	0.00391551	0.0627921	0.121758	0.0156237	3	0.0151544	0.011884	0.00618149	0.0763926	0.0964585	3	0.00430563	0.00861884	0.0031464	0.0126695	0.0223818
4	0.00477119	0.00459825	0.106244	0.100256	0.00615455	4	0.0106739	0.0104958	0.119669	0.110276	0.0173119	4	0.0124715	0.019394	0.00629358	0.0068811	0.0190611	4	0.0116782	0.00737758	0.0976244	0.149052	0.0162463	4	0.0146935	0.00904107	0.00749054	0.107846	0.119861	4	0.00580968	0.00373176	0.00295039	0.0111095	0.0257718
5	0.00624594	0.00592521	0.131874	0.116578	0.00854538	5	0.0103942	0.00896002	0.14607	0.127303	0.0165964	5	0.0127443	0.0231839	0.00480082	0.00668446	0.0170568	5	0.0102566	0.0088423	0.117225	0.174433	0.013468	5	0.0139167	0.00896559	0.00790918	0.131723	0.139438	5	0.00391978	0.00235629	0.00171917	0.0144232	0.0307772
6	0.0037723	0.00614008	0.15241	0.130547	0.00723616	6	0.00894687	0.0111543	0.171348	0.144913	0.0140507	6	0.0124451	0.0305665	0.00776357	0.00512935	0.0183065	6	0.0108864	0.00873793	0.141576	0.187771	0.0150503	6	0.0136609	0.00786853	0.00867744	0.155112	0.15441	6	0.00465265	0.00367761	0.00250766	0.0150687	0.0297711
7	0.00432468	0.00391904	0.172038	0.148645	0.00755355	7	0.0088166	0.0109691	0.193356	0.15822	0.016138	7	0.0129522	0.0322488	0.00240401	0.00788107	0.0173825	7	0.00917699	0.012795	0.162831	0.205345	0.0148247	7	0.0139747	0.00743942	0.0092277	0.176075	0.170737	7	0.00440631	0.00270346	0.0046872	0.015658	0.0303514
8	0.00460349	0.00650694	0.187359	0.159017	0.00737711	8	0.0104707	0.0136558	0.208005	0.168587	0.0131824	8	0.0122192	0.0357767	0.00466054	0.00781752	0.0165233	8	0.0117741	0.0140318	0.17763	0.217556	0.0131141	8	0.0125492	0.00894944	0.0113982	0.190998	0.18172	8	0.00379756	0.00381971	0.0042401	0.0155112	0.0314016
9	0.0044274	0.00525125	0.201919	0.170624	0.00589876	9	0.00892058	0.0124044	0.232278	0.186648	0.0155729	9	0.0127202	0.04237	0.00463056	0.0056761	0.0174414	9	0.0091278	0.0156321	0.197769	0.232798	0.0143017	9	0.0133037	0.00749193	0.0110959	0.210656	0.19669	9	0.00510225	0.00265598	0.00531267	0.0188406	0.0322806
10	0.00377964	0.00641679	0.216531	0.180037	0.00749508	10	0.0123722	0.0133988	0.245529	0.197054	0.014489	10	0.0120642	0.0446506	0.00665808	0.00324091	0.0176468	10	0.0105121	0.0175538	0.21176	0.248086	0.0147264	10	0.0135893	0.00888798	0.0124565	0.224607	0.208392	10	0.00430912	0.00452065	0.005628	0.0182754	0.0354129
11	0.00442635	0.0078318	0.226767	0.190664	0.00711401	11	0.0109977	0.0154999	0.261108	0.208328	0.0139263	11	0.0103062	0.0463966	0.00443273	0.00473008	0.0172046	11	0.00963883	0.0184379	0.226679	0.254689	0.0115654	11	0.0124526	0.00835431	0.0139232	0.238185	0.217894	11	0.00424427	0.00346891	0.00547604	0.0198525	0.0330675
12	0.0044295	0.00539694	0.236044	0.201606	0.0076924	12	0.00902097	0.0178424	0.238781	0.220099	0.0147141	12	0.0134412	0.0499629	0.0064003	0.00558977	0.0144482	12	0.00958965	0.0209583	0.235889	0.264677	0.0142753	12	0.0127825	0.00768004	0.0147325	0.236905	0.228794	12	0.00339819	0.00282938	0.00823361	0.00162672	0.0324217
13	0.006443	0.00769344	0.248574	0.207954	0.00767988	13	0.00825369	0.0177993	0.252432	0.229988	0.0124491	13	0.0133042	0.0505517	0.00379126	0.00762568	0.0128632	13	0.00815612	0.0209547	0.247375	0.271123	0.0122528	13	0.0113112	0.0076176	0.0154825	0.24946	0.236355	13	0.00243425	0.00101841	0.00692756	0.00264256	0.0320618
14	0.00615161	0.00707399	0.257459	0.218317	0.0104413	14	0.00873294	0.0202996	0.260478	0.237711	0.01241	14	0.0149949	0.0544509	0.00654298	0.00804773	0.0128356	14	0.00965323	0.0227481	0.256891	0.281637	0.0125395	14	0.0120566	0.00817926	0.0167072	0.258276	0.245888	14	0.00109148	0.00181528	0.00843199	0.00192814	0.0324423
15	0.00494099	0.00784857	0.265326	0.228104	0.00859444	15	0.0116336	0.0190339	0.268649	0.249732	0.0113841	15	0.01282	0.0549929	0.00489554	0.00753456	0.012683	15	0.00907142	0.0227925	0.267813	0.288264	0.0137571	15	0.0116047	0.00854866	0.0165583	0.267263	0.255367	15	0.00222903	0.00337677	0.00777346	0.00172871	0.0304735
16	0.00529946	0.0049389	0.271113	0.23673	0.00517943	16	0.0112165	0.0207621	0.281651	0.254241	0.0104388	16	0.0130014	0.0608303	0.00688469	0.00392914	0.0165366	16	0.00652586	0.0246867	0.268751	0.303395	0.013354	16	0.0113772	0.00768059	0.0167959	0.273838	0.264788	16	0.00482423	0.00312294	0.0104543	0.00686847	0.0345614
17	0.00573654	0.0086263	0.27781	0.240715	0.00686345	17	0.00904248	0.0200151	0.291008	0.254772	0.0128768	17	0.0124439	0.0610658	0.00209706	0.00595666	0.0151403	17	0.00840804	0.0241253	0.276818	0.312446	0.0124687	17	0.0118373	0.00772902	0.0175889	0.281879	0.269311	17	0.00351796	0.00175445	0.00802929	0.00792183	0.0380116
18	0.00442635	0.00984321	0.28782	0.247248	0.00831256	18	0.00942015	0.0214744	0.303561	0.267211	0.0112088	18	0.0115643	0.0640194	0.00303349	0.00745902	0.0153926	18	0.0082245	0.0258503	0.283108	0.318988	0.0115666	18	0.0116201	0.007357	0.019056	0.291496	0.277816	18	0.00290653	0.00260747	0.00827306	0.0107106	0.0370266
19	0.00337086	0.00921746	0.294234	0.25089	0.00769032	19	0.00892894	0.0208314	0.309975	0.275146	0.0126173	19	0.0151932	0.0648581	0.00331765	0.00484399	0.0159141	19	0.0100971	0.026852	0.285765	0.321993	0.0147911	19	0.0127532	0.00746563	0.018967	0.296658	0.282676	19	0.00364215	0.00359395	0.00896389	0.0122854	0.036145
20	0.00381004	0.00806764	0.29328	0.264954	0.00625164	20	0.0108233	0.0207286	0.318494	0.282559	0.0102315	20	0.0146644	0.0648893	0.00689668	0.00576722	0.0167889	20	0.00896586	0.0256956	0.291585	0.33251	0.0133156	20	0.0116469	0.00786638	0.0181639	0.30112	0.293341	20	0.00448467	0.00363358	0.00908951	0.0150707	0.0350451
21	0.00553215	0.0091965	0.302067	0.268535	0.0046334	21	0.00932454	0.0202888	0.331282	0.291041	0.0088692	21	0.0116917	0.0634258	0.0048308	0.00584036	0.016396	21	0.0102878	0.0272359	0.296368	0.341527	0.0158156	21	0.0114285	0.0083815	0.0189071	0.309906	0.300368	21	0.00567585	0.00251418	0.00909871	0.0187304	0.0373791
22	0.00377859	0.00965035	0.303988	0.277472	0.00830629	22	0.0123196	0.0206701	0.333558	0.297201	0.0117514	22	0.0136467	0.0696129	0.00573005	0.00632476	0.0153241	22	0.00930534	0.0284774	0.301426	0.34237	0.0145404	22	0.0124806	0.00846784	0.0195993	0.312991	0.305681	22	0.00317727	0.00433165	0.00945912	0.0178575	0.0332694
23	0.00473346	0.0116827	0.312028	0.282456	0.00652936	23	0.0095552	0.021919	0.343854	0.308014	0.00908006	23	0.0169355	0.0664995	0.00707294	0.004338	0.0155909	23	0.00921417	0.0274878	0.299632	0.350514	0.013907	23	0.0112768	0.00783428	0.0203632	0.318505	0.313661	23	0.00419894	0.0026908	0.00801657	0.0228112	0.0343786
24	0.00377964	0.0116796	0.311521	0.290274	0.00742931	24	0.009064	0.024534	0.348224	0.306815	0.00936319	24	0.0124054	0.067641	0.00562334	0.00730674	0.0165666	24	0.00804816	0.0288097	0.300581	0.355219	0.0136143	24	0.0117434	0.00696393	0.0216744	0.320108	0.317436	24	0.00412474	0.00280406	0.00891591	0.0249553	0.0337504
25	0.00275559	0.0105004	0.317408	0.296451	0.00806095	25	0.012022	0.0202183	0.358475	0.318255	0.00977662	25	0.0141838	0.0677456	0.00209466	0.0044615	0.014775	25	0.00931134	0.0264669	0.310013	0.360323	0.0129557	25	0.0113921	0.00802964	0.0190619	0.328632	0.325009	25	0.00303289	0.0047643	0.00804583	0.0261082	0.0324674
26	0.00330378	0.00991343	0.314449	0.302116	0.00892749	26	0.0113025	0.0232026	0.363564	0.324359	0.00806959	26	0.0139951	0.0672529	0.00418453	0.00328048	0.0169127	26	0.00684735	0.0284487	0.308191	0.363922	0.0126942	26	0.011651	0.00715121	0.0205216	0.328735	0.330132	26	0.00404217	0.00400801	0.00955403	0.0303249	0.0313046
27	0.00159005	0.00964825	0.323325	0.307881	0.00483699	27	0.0135924	0.0228751	0.372305	0.333558	0.0075223	27	0.0146861	0.0663709	0.0030107	0.00391236	0.0157988	27	0.00624155	0.025073	0.306996	0.370095	0.0112871	27	0.00986129	0.00714134	0.0191988	0.334209	0.337178	27	0.00476099	0.00605156	0.00834368	0.0339878	0.0312647
28	0.00322307	0.00898582	0.3178	0.317123	0.00768614	28	0.0116587	0.020437	0.378747	0.3442	0.00867611	28	0.0135578	0.0689075	0.00429484	0.00564612	0.0158072	28	0.0076271	0.0286502	0.313866	0.371936	0.0118041	28	0.0109934	0.00750294	0.0193577	0.336804	0.344419	28	0.00365775	0.00421917	0.00987652	0.036377	0.0274072
29	0.00209002	0.0117718	0.319093	0.316167	0.00445069	29	0.0111101	0.0205434	0.384356	0.352358	0.00552148	29	0.0143592	0.0668924	0.00441714	0.00509458	0.01878	29	0.00500236	0.0273966	0.310327	0.379694	0.0105397	29	0.00982297	0.00606749	0.0199039	0.337925	0.349406	29	0.00653466	0.0046034	0.007832	0.0404484	0.031866
30	0.00185838	0.0116261	0.32058	0.327032	0.00411556	30	0.0128466	0.0218007	0.390247	0.348838	0.00695487	30	0.0153109	0.0648617	0.00292318	0.00549385	0.0137536	30	0.00723842	0.0264033	0.310978	0.385089	0.0130373	30	0.00946534	0.00731448	0.0199434	0.340602	0.353653	30	0.00469294	0.00549453	0.00756166	0.0432615	0.0293266
31	-6.07929e-05	0.00983482	0.318773	0.328541	0.00350898	31	0.0115248	0.0191403	0.397767	0.357778	0.00903623	31	0.0145539	0.0669729	0.0021678	0.00563293	0.0134941	31	0.00891427	0.0250418	0.308939	0.392392	0.011557	31	0.00939907	0.00679276	0.0180056	0.341826	0.35957	31	0.00433015	0.00607718	0.00766671	0.0486946	0.0319631
32	0.000515691	0.0131281	0.320272	0.341118	0.00406023	32	0.0116479	0.018563	0.400059	0.359975	0.00827097	32	0.013422	0.0657317	0.00235964	0.00421691	0.0118539	32	0.00636271	0.0270511	0.311465	0.392411	0.010217	32	0.00860053	0.00617544	0.0195808	0.343932	0.364501	32	0.00336256	0.00556847	0.00701707	0.0488068	0.0259446
33	-0.00137518	0.013495	0.321796	0.342415	0.00325006	33	0.0136295	0.0189383	0.404074	0.372793	0.00567075	33	0.0146632	0.062402	0.00136567	0.00274093	0.0135962	33	0.00567414	0.0256932	0.306563	0.400622	0.0121676	33	0.00867116	0.00597614	0.0193755	0.344144	0.371943	33	0.00499573	0.00750688	0.00611083	0.0524563	0.0291131
34	0.000854245	0.00987046	0.328615	0.35957	0.00177485	34	0.0104551	0.0168731	0.413986	0.368162	0.00601428	34	0.0154022	0.0648389	0.000792543	0.00220138	0.0154443	34	0.00831687	0.0241493	0.30262	0.405086	0.0102374	34	0.00836772	0.00654209	0.0169643	0.348407	0.377606	34	0.00584746	0.00504051	0.00713984	0.0582615	0.0241832
35	-0.00276188	0.010992	0.318628	0.342384	0.00245869	35	0.012512	0.0166914	0.420378	0.373761	0.00810513	35	0.0135157	0.0642729	0.00148317	0.00314979	0.0124066	35	0.00706208	0.0237666	0.305914	0.399606	0.00923217	35	0.00805065	0.00560406	0.01715	0.348307	0.371917	35	0.00414903	0.00774062	0.00639964	0.0627387	0.0286556
36	-0.00330692	0.0115286	0.324893	0.359216	0.000990783	36	0.0145581	0.0152835	0.418617	0.397492	0.00500499	36	0.0151235	0.0617663	-0.00158629	0.00233566	0.0117481	36	0.00452012	0.0239597	0.303747	0.394366	0.00993514	36	0.00691976	0.00525709	0.016924	0.349086	0.383692	36	0.00487254	0.00895528	0.00637584	0.0611372	0.0212541
37	-0.0034914	0.013344	0.317013	0.360702	-0.00072038	37	0.0128526	0.014092	0.42525	0.412474	0.0030101	37	0.0134004	0.0619466	-0.00354306	0.00163904	0.0125965	37	0.00628234	0.0230744	0.298197	0.398604	0.0137715	37	0.00716442	0.00521452	0.0168368	0.34682	0.390593	37	0.00713183	0.00822416	0.00541486	0.068571	0.0267997
38	-0.00496825	0.0135023	0.31616	0.365391	-0.000207762	38	0.0148856	0.0136414	0.425136	0.383411	0.00388553	38	0.0160787	0.0615284	-0.00239561	0.00152753	0.0110344	38	0.00413744	0.0225526	0.298467	0.407243	0.0101175	38	0.00620741	0.00468492	0.0165654	0.346588	0.385348	38	0.00532709	0.00993822	0.0051855	0.068598	0.020993
39	-0.00615266	0.0104564	0.31539	0.372792	-0.00051053	39	0.011881	0.0114423	0.434092	0.397442	0.00552622	39	0.0127311	0.0568698	-0.0029016	0.00238362	0.0163467	39	0.00294863	0.0203873	0.298409	0.399762	0.00769547	39	0.00726447	0.00289231	0.0140953	0.349297	0.389999	39	0.00697961	0.00901694	0.00547126	0.0739236	0.0149463
40	-0.00625119	0.0115265	0.310888	0.389978	0.00034975	40	0.0138147	0.00924924	0.441086	0.434413	0.00390804	40	0.012564	0.0574682	-0.00318336	-0.000311742	0.0145431	40	0.00112283	0.0166565	0.292513	0.383008	0.00802057	40	0.00670536	0.00289545	0.0124774	0.348163	0.402467	40	0.00609312	0.0101497	0.00379409	0.0809972	0.027885

## Sheet: Figure5J_without 18_Sec17 6AtoN
	Replicate 1						Replicate 2						Replicate 3						Replicate 4						Average						Stdev
	100nM	500nM	1000nM	2000nM	0nM		100nM	500nM	1000nM	2000nM	0nM		100nM	500nM	1000nM	2000nM	0nM		100nM	500nM	1000nM	2000nM	0nM		100nM	500nM	1000nM	2000nM	0nM		100nM	500nM	1000nM	2000nM	0nM
Time (min)	6AtoN	6AtoN	6AtoN	6AtoN	Buffer	Time (min)	6AtoN	6AtoN	6AtoN	6AtoN	Buffer	Time (min)	6AtoN	6AtoN	6AtoN	6AtoN	Buffer	Time (min)	6AtoN	6AtoN	6AtoN	6AtoN	Buffer	Time (min)	6AtoN	6AtoN	6AtoN	6AtoN	Buffer	Time (min)	6AtoN	6AtoN	6AtoN	6AtoN	Buffer
0	0.00587579	0.016054	0.0123715	0.0191224	0	0	0.0125025	0.0067158	0.0133976	0.0243871	0.0190178	0	0.0131447	0.00877673	0.0163516	0.00251767	0.018388	0	0.0152259	0.0103437	0.0088043	0.00856573	0.0182017	0	0.0139019	0.0112014	0.0110378	0.0115245	0.0173584	0	0.00927448	0.0048089	0.00470766	0.00241095	0.00805685
1	0.00774878	0.0182924	0.0187505	0.0196221	0.00278075	1	0.00971625	0.0111774	0.0191245	0.0249927	0.0165846	1	0.0132154	0.021467	0.0250273	-0.001666	0.015159	1	0.00882745	0.0154607	0.0186099	0.00861875	0.0150536	1	0.0123945	0.00876416	0.0149768	0.0188283	0.0177445	1	0.00644709	0.000985261	0.00358213	0.000266004	0.00834691
2	0.0068979	0.0167347	0.0225869	0.0210689	0.00260781	2	0.0115914	0.0140815	0.0209689	0.0251591	0.0192215	2	0.0127526	0.0447193	0.0319021	-0.00126727	0.0153245	2	0.00711013	0.0267521	0.0304265	0.00768132	0.00902616	2	0.011545	0.00853314	0.0191895	0.0246608	0.0179698	2	0.00728999	0.00265064	0.00668246	0.00505836	0.00914175
3	0.00940879	0.0194221	0.0279435	0.0234617	0.00337296	3	0.00963321	0.0173203	0.0246373	0.0236906	0.0196196	3	0.0122455	0.0646564	0.0454626	-0.0024225	0.0164887	3	0.00580709	0.0439229	0.0398923	0.00882479	0.00716192	3	0.0116608	0.00828303	0.0268884	0.0308243	0.018659	3	0.00765026	0.00214716	0.0147897	0.00802517	0.00851746
4	0.00937538	0.0233079	0.0297716	0.024194	0.00477119	4	0.00980411	0.0228277	0.0268467	0.025329	0.0171722	4	0.0121519	0.0872337	0.0508027	0.000151783	0.0164216	4	0.00698007	0.059492	0.0468784	0.00727045	0.00908999	4	0.0118637	0.00871985	0.0352092	0.0344989	0.0189312	4	0.0059708	0.00152187	0.0210309	0.0108202	0.0101144
5	0.00965309	0.0213796	0.0337369	0.022985	0.00624594	5	0.00909883	0.0256861	0.0307293	0.0219503	0.0180973	5	0.0134612	0.104848	0.0586978	0.00205268	0.0131555	5	0.00174863	0.0775118	0.0567093	0.00885732	0.00661758	5	0.0110291	0.00683352	0.0415259	0.0403918	0.0179309	5	0.00568101	0.00441235	0.031239	0.0142111	0.00787496
6	0.00859131	0.024684	0.0342052	0.024656	0.0037723	6	0.0119175	0.0295604	0.0305952	0.02663	0.0151844	6	0.0124061	0.117185	0.0640945	-0.000348137	0.0145703	6	0.00497011	0.0885178	0.062441	0.00756927	0.00600821	6	0.0098838	0.00849299	0.0475874	0.0424138	0.0196184	6	0.00584324	0.00347476	0.0355305	0.0174378	0.0104815
7	0.0105123	0.0258094	0.0386492	0.0261405	0.00432468	7	0.0106249	0.0367371	0.0311051	0.026265	0.0139168	7	0.0122407	0.134633	0.0700093	0.00120824	0.0135128	7	0.00229779	0.103644	0.0681523	0.00775	0.0067368	7	0.00962278	0.00781168	0.0553968	0.0459689	0.0200518	7	0.00482942	0.0047755	0.0421388	0.0195782	0.0106539
8	0.00664211	0.0279915	0.0372653	0.0236168	0.00460349	8	0.0126385	0.0388241	0.0364789	0.0259849	0.0151216	8	0.0140679	0.142923	0.0728703	0.00139014	0.0154984	8	0.005052	0.114488	0.0735889	0.00878623	0.00524589	8	0.0101173	0.00811086	0.0604346	0.049111	0.0194626	8	0.00600365	0.00400082	0.0471242	0.0212021	0.00932155
9	0.00790852	0.0276459	0.037677	0.0259111	0.0044274	9	0.00983059	0.0415441	0.0351552	0.0271818	0.0141241	9	0.0148533	0.154735	0.0753891	-2.16833e-05	0.0147322	9	0.00315645	0.123669	0.076359	0.00799822	0.00626111	9	0.00988621	0.00696518	0.0642862	0.0497304	0.0203637	9	0.00530357	0.00343561	0.0518941	0.0230955	0.0107276
10	0.0076663	0.0327052	0.0392862	0.0263636	0.00377964	10	0.00987151	0.045854	0.038656	0.0265546	0.0135212	10	0.0158425	0.16355	0.0782357	0.00270439	0.0145164	10	0.00529647	0.133508	0.0820498	0.0108153	0.00578421	10	0.00940035	0.00761143	0.070689	0.0533307	0.0212445	10	0.0054106	0.00228801	0.0547984	0.0248735	0.00903248
11	0.0095111	0.0318303	0.0392233	0.0280828	0.00442635	11	0.00978846	0.0498751	0.0402909	0.0270046	0.0135698	11	0.0120992	0.170205	0.078385	0.00222735	0.0120009	11	0.00295292	0.140674	0.0826679	0.0088766	0.00385132	11	0.00846207	0.0074175	0.0741266	0.0540607	0.0213214	11	0.00503843	0.00386892	0.0583341	0.0247803	0.0107909
12	0.00762872	0.0310672	0.0405423	0.0292939	0.0044295	12	0.00981615	0.052837	0.0406991	0.0290955	0.0148089	12	0.0122407	0.17776	0.0846744	0.00304168	0.013556	12	0.00520013	0.145144	0.084938	0.010555	0.00517243	12	0.00949169	0.00754833	0.0763492	0.0553931	0.0229815	12	0.00544893	0.00230906	0.0605638	0.0255867	0.0107621
13	0.00870198	0.0360816	0.0434097	0.0304966	0.006443	13	0.0125939	0.0566486	0.0417008	0.0323199	0.0125711	13	0.0133341	0.184208	0.0813833	0.00610986	0.0102995	13	0.00474972	0.152243	0.0894142	0.00914168	0.00663805	13	0.00898791	0.00868188	0.0816577	0.0581749	0.023986	13	0.00297534	0.00392215	0.0619875	0.0270675	0.0128879
14	0.00796803	0.0363197	0.0411751	0.0330612	0.00615161	14	0.00953211	0.0573912	0.0457091	0.0364454	0.0123946	14	0.0151363	0.187056	0.0829975	0.00537504	0.0108018	14	0.00310225	0.159066	0.0898155	0.0123082	0.00652605	14	0.00896853	0.00686746	0.0842591	0.0588999	0.0272716	14	0.00310912	0.00335324	0.0656361	0.0268695	0.0130687
15	0.00823112	0.0370662	0.0438895	0.0341381	0.00494099	15	0.011589	0.064379	0.0440479	0.0308837	0.0105679	15	0.0139049	0.193057	0.0859441	0.00516303	0.0112934	15	0.00594559	0.161701	0.0903782	0.012266	0.00792664	15	0.00868225	0.00858856	0.0877155	0.0594385	0.0257626	15	0.0028834	0.00283862	0.0655128	0.0267947	0.0118011
16	0.00961864	0.0389945	0.0458716	0.0283762	0.00529946	16	0.0127865	0.0666923	0.0456301	0.0376375	0.0100988	16	0.0134001	0.197049	0.0888677	0.00578462	0.0123833	16	0.00483643	0.166552	0.0954316	0.0154072	0.00467506	16	0.00811417	0.00908053	0.0907463	0.0623111	0.0271403	16	0.00373786	0.00400226	0.0670947	0.0286834	0.0111665
17	0.00972617	0.0390039	0.045506	0.0373062	0.00573654	17	0.0116227	0.0694412	0.0487814	0.0416194	0.00895686	17	0.0152837	0.200417	0.0897555	0.00415114	0.0119913	17	0.00375739	0.16932	0.0953978	0.0143662	0.00364539	17	0.00758251	0.00836874	0.0925883	0.0632284	0.0310973	17	0.00366217	0.00410459	0.0681718	0.0279076	0.0146492
18	0.00925636	0.0391333	0.0455971	0.0442582	0.00442635	18	0.0101303	0.0709865	0.0488257	0.0471501	0.0123579	18	0.015195	0.203568	0.093544	0.00990203	0.0127083	18	0.00426801	0.174611	0.0950424	0.0147771	0.00556623	18	0.00876469	0.00788488	0.0949104	0.0631551	0.0353951	18	0.00437852	0.00316263	0.0708367	0.0276624	0.0179142
19	0.0099047	0.0419522	0.044803	0.0324043	0.00337086	19	0.00872693	0.0762629	0.0518466	0.0406177	0.0102291	19	0.0124157	0.207535	0.094839	0.0127245	0.0139145	19	0.00107423	0.176862	0.0983017	0.0138541	0.000893584	19	0.00710201	0.00656862	0.0983591	0.0649838	0.0289587	19	0.00601815	0.00479459	0.0701167	0.0290683	0.0137104
20	0.0103254	0.042255	0.0455615	0.0575558	0.00381004	20	0.0105792	0.0805343	0.0529908	0.055193	0.0105442	20	0.0111244	0.206199	0.0948788	0.0113994	0.00991458	20	0.00168842	0.180272	0.0979619	0.0142577	0.00414397	20	0.00710321	0.00753102	0.10102	0.0655047	0.0423355	20	0.00362154	0.00506143	0.0712524	0.0283531	0.0243447
21	0.00804424	0.044011	0.0465966	0.050632	0.00553215	21	0.0105371	0.0792453	0.0546113	0.0452627	0.00777699	21	0.0131519	0.214431	0.0938042	0.011344	0.0110848	21	0.00395369	0.183758	0.100151	0.0186677	0.00614068	21	0.00763366	0.00751167	0.102338	0.0671197	0.0381875	21	0.00248839	0.00332385	0.0726792	0.0288855	0.0171165
22	0.00956957	0.0435694	0.0473655	0.0266235	0.00377859	22	0.0108512	0.0831364	0.0555891	0.0628576	0.00949823	22	0.0157525	0.215548	0.0953546	0.0122258	0.0129637	22	0.00412711	0.185578	0.101586	0.0166519	0.00506886	22	0.00782734	0.00818262	0.104094	0.0681803	0.0353777	22	0.00421011	0.00357016	0.0732872	0.0292212	0.024315
23	0.00959567	0.0464666	0.0480507	0.0438402	0.00473346	23	0.0109078	0.0873572	0.0543121	0.0887133	0.0101427	23	0.00927551	0.215749	0.0968303	0.00995985	0.0101028	23	-0.000102365	0.190208	0.0995403	0.0187436	0.0044631	23	0.00736051	0.00680036	0.108011	0.067301	0.0504324	23	0.0031915	0.00601382	0.074063	0.028095	0.0354476
24	0.0107264	0.0465679	0.0491528	0.0827095	0.00377964	24	0.00889302	0.0918019	0.0552073	0.0623334	0.0107575	24	0.0126747	0.217379	0.0967965	0.00793969	0.0119937	24	0.00107061	0.194757	0.104593	0.0203197	0.00483041	24	0.0078403	0.00689666	0.111042	0.0696509	0.0551208	24	0.00413557	0.0051281	0.0759449	0.0304114	0.0318141
25	0.00884501	0.0472872	0.0489024	0.0914059	0.00275559	25	0.00951165	0.0936445	0.0554551	0.0695265	0.00687787	25	0.0133929	0.217911	0.101428	0.0102514	0.00850095	25	0.0018233	0.194297	0.103497	0.0168411	0.00329976	25	0.00535854	0.00672665	0.111743	0.0692849	0.0592578	25	0.00278071	0.00425949	0.0751572	0.0298094	0.0383283
26	0.0101187	0.0451647	0.05083	0.0407791	0.00330378	26	0.00711779	0.0940923	0.0558165	0.0807805	0.00532839	26	0.013267	0.221165	0.1004	0.0260765	0.0122574	26	0.00363937	0.193833	0.104064	0.0120781	0.00176067	26	0.00566257	0.00695863	0.11103	0.0702367	0.0445459	26	0.00463295	0.00324261	0.0757677	0.0294008	0.0345058
27	0.00816848	0.0487092	0.0508657	0.0582242	0.00159005	27	0.00926973	0.0966594	0.0526102	0.146478	0.00810394	27	0.010917	0.22544	0.100921	0.016872	0.0110812	27	0.00203766	0.196502	0.107746	0.0266816	0.000862272	27	0.00540937	0.00649196	0.113957	0.0704072	0.077128	27	0.00498979	0.00389664	0.0753994	0.0323479	0.0620953
28	0.0107347	0.0495141	0.0522946	0.0711625	0.00322307	28	0.00893033	0.0991652	0.0560667	0.119857	0.00724984	28	0.0143137	0.225305	0.103314	0.0199402	0.0123114	28	0.002582	0.19891	0.102504	0.0339328	0.00244712	28	0.00630786	0.00741568	0.115863	0.0702886	0.074984	28	0.0045222	0.0042822	0.076085	0.0279634	0.0430892
29	0.00926576	0.0514101	0.0535319	0.0483472	0.00209002	29	0.0085115	0.102244	0.0559661	0.114248	0.00596927	29	0.013231	0.230232	0.108074	0.0207184	0.00883788	29	0.00156799	0.198972	0.107598	0.0181086	0.00089238	29	0.00444739	0.00644841	0.117542	0.0723652	0.0602347	29	0.00364178	0.00424337	0.0749609	0.0305364	0.0491598
30	0.00940252	0.0528895	0.0553118	0.0206383	0.00185838	30	0.00939731	0.104481	0.0578895	0.163347	0.00533905	30	0.0130068	0.230769	0.106258	0.00175032	0.00890862	30	0.000845412	0.200172	0.107852	0.0324037	-0.000531092	30	0.00389374	0.00654842	0.119181	0.0736844	0.0721296	30	0.00412148	0.00493895	0.0747337	0.0296179	0.0792151
31	0.00969798	0.0538917	0.0570268	0.0233465	-6.07929e-05	31	0.00942379	0.104696	0.0539566	0.145134	0.00532958	31	0.012297	0.228943	0.105004	0.0406537	0.0122886	31	0.000881541	0.2037	0.109872	0.0335713	0.00244953	31	0.00500173	0.00666777	0.120762	0.0736186	0.0673507	31	0.00533382	0.0050129	0.0761855	0.0314343	0.0675563
32	0.00912481	0.0539606	0.0564904	0.0225293	0.000515691	32	0.00812275	0.110587	0.0528759	0.142736	0.00512938	32	0.0134145	0.231001	0.105064	0.076654	0.00912084	32	0.0022737	0.204064	0.108116	0.0575057	0.00237486	32	0.00428519	0.00650709	0.12287	0.072494	0.0742569	32	0.00373964	0.0037003	0.0758016	0.0309022	0.0618292
33	0.00971886	0.0501217	0.0560671	0.0339014	-0.00137518	33	0.00943101	0.108276	0.0525826	0.197187	0.00469936	33	0.0143173	0.234486	0.107064	0.0775334	0.0110201	33	-0.00165831	0.204337	0.112867	0.0811015	-0.00110313	33	0.00331028	0.00583052	0.120912	0.0738388	0.104063	33	0.00585383	0.00648711	0.0778802	0.033844	0.0840295
34	0.00995795	0.052832	0.0562295	0.112188	0.000854245	34	0.0108632	0.112454	0.0525563	0.151269	0.00455366	34	0.0108678	0.233462	0.109761	0.0511231	0.00894339	34	0.000154149	0.205536	0.110009	0.0435624	0.000505802	34	0.00371427	0.00699178	0.123607	0.0729315	0.10234	34	0.00393795	0.00593883	0.0769608	0.0321622	0.0545246
35	0.00985041	0.0526577	0.0586014	0.183211	-0.00276188	35	0.00930464	0.112541	0.0470747	0.180595	0.0031025	35	0.0107107	0.228671	0.109968	0.029535	0.00862925	35	0.000416685	0.205507	0.108619	0.0657196	-0.000955003	35	0.00200372	0.00652391	0.123569	0.0714318	0.143175	35	0.00505206	0.00529605	0.0770193	0.032717	0.0670911
36	0.00954556	0.0551383	0.0602964	0.119339	-0.00330692	36	0.0102362	0.115579	0.0474074	0.178015	0.00303853	36	0.0103139	0.236041	0.114266	0.0199269	0.00874315	36	-0.00216532	0.210555	0.108792	0.0699127	0.000391395	36	0.00221654	0.00587214	0.127091	0.0721652	0.122422	36	0.00506992	0.0069692	0.0783451	0.0323675	0.0541173
37	0.0111554	0.0550339	0.062201	0.145419	-0.0034914	37	0.00536903	0.117824	0.0508484	0.119748	0.000498722	37	0.0140859	0.236456	0.116336	0.0121944	0.0110596	37	-0.00296496	0.213216	0.112132	0.0302735	-0.00343705	37	0.00115748	0.00451984	0.128691	0.0750604	0.0984799	37	0.00686072	0.00709841	0.0796491	0.0326026	0.060447
38	0.00833344	0.0546205	0.0609365	0.105765	-0.00496825	38	0.00933713	0.117338	0.047198	0.108184	0.00369363	38	0.0110189	0.234123	0.112076	0.0114584	0.00979348	38	-0.00320823	0.212673	0.108125	0.0661124	-0.00338406	38	0.0012837	0.00482078	0.12821	0.0720866	0.0933536	38	0.00680928	0.00697141	0.0795853	0.0319575	0.0236226
39	0.00951841	0.0561218	0.0573997	0.112442	-0.00615266	39	0.00859093	0.120182	0.043544	0.160213	0.00262155	39	0.0113702	0.229238	0.111412	0.0664677	0.00896737	39	-0.00423308	0.211893	0.109568	0.0950894	-0.00213762	39	0.000824661	0.00462542	0.129399	0.0701704	0.122582	39	0.00650617	0.00768569	0.0782934	0.0348152	0.0337252
40	0.0097648	0.0573182	0.0632109	0.209273	-0.00625119	40	0.00918549	0.121603	0.0444979	0.201232	0.00193447	40	0.0111651	0.227938	0.111717	0.107762	0.00866042	40	-0.00270484	0.215056	0.10619	0.0650195	-0.00333227	40	0.000252859	0.00541515	0.131326	0.0712997	0.158508	40	0.00654906	0.00703808	0.0793172	0.0316316	0.0810632

## Sheet: Figure5K_withSec18_Sec17 6AtoN 
	Replicate 1						Replicate 2						Replicate 3						Replicate 4						Average						Stdev
	100nM	500nM	1000nM	2000nM	0nM		100nM	500nM	1000nM	2000nM	0nM		100nM	500nM	1000nM	2000nM	0nM		100nM	500nM	1000nM	2000nM	0nM		100nM	500nM	1000nM	2000nM	0nM		100nM	500nM	1000nM	2000nM	0nM
Time (min)	6AtoN	6AtoN	6AtoN	6AtoN	Buffer	Time (min)	6AtoN	6AtoN	6AtoN	6AtoN	Buffer	Time (min)	6AtoN	6AtoN	6AtoN	6AtoN	Buffer	Time (min)	6AtoN	6AtoN	6AtoN	6AtoN	Buffer	Time (min)	6AtoN	6AtoN	6AtoN	6AtoN	Buffer	Time (min)	6AtoN	6AtoN	6AtoN	6AtoN	Buffer
0	0.00309624	0.0147968	0.0106106	0.0173328	0.00135306	0	0.0389678	0.0127439	0.0392805	0.0542866	0.018044	0	0.0144001	0	0.0131447	0.00877673	0.0179689	0	0.0144265	0.00850641	0.0231777	0.00860558	0.0203057	0	0.0144179	0.0188302	0.0120157	0.0243563	0.0267417	0	0.00877715	0.0183367	0.00320778	0.0143712	0.0242505
1	0.00280591	0.0132099	0.0570088	0.0156253	0.00721528	1	0.0369432	0.0136259	0.0646102	0.0566765	0.0172539	1	0.0149444	0.00421645	0.0132154	0.021467	0.0221216	1	0.013354	0.00629553	0.0332211	0.0107056	0.0197731	1	0.016591	0.017701	0.0110438	0.0516134	0.0276691	1	0.00655889	0.0174789	0.00411734	0.0163753	0.0252412
2	0.00458777	0.0151437	0.0956809	0.0135319	0.00713385	2	0.0356548	0.0153935	0.112814	0.0588183	0.0157494	2	0.0133066	0.015818	0.0127526	0.0447193	0.0208455	2	0.00983557	0.0119325	0.0849981	0.0117239	0.0186659	2	0.0155987	0.0166927	0.0141566	0.0978309	0.0280247	2	0.00601701	0.01663	0.00193016	0.014032	0.0266834
3	0.00597971	0.0187651	0.120866	0.0172125	0.00959776	3	0.0218951	0.0188212	0.148425	0.0558751	0.0152922	3	0.0154395	0.0300523	0.0122455	0.0646564	0.0201041	3	0.0104918	0.0207424	0.142758	0.00796973	0.0156237	3	0.0151544	0.0127889	0.0194429	0.13735	0.0270191	3	0.00430563	0.00820258	0.00112575	0.0145537	0.0254137
4	0.00605937	0.0221768	0.140393	0.0154661	0.00615455	4	0.0234165	0.026751	0.181589	0.0568669	0.0173119	4	0.0156762	0.0468123	0.0121519	0.0872337	0.0190611	4	0.0112523	0.0334582	0.183257	0.0161175	0.0162463	4	0.0146935	0.0135761	0.027462	0.168413	0.0294835	4	0.00580968	0.00890885	0.0056742	0.0242806	0.023717
5	0.0083129	0.0264784	0.161535	0.0166019	0.00854538	5	0.0247838	0.0366874	0.209549	0.0567879	0.0165964	5	0.0180542	0.0641191	0.0134612	0.104848	0.0170568	5	0.0153106	0.0506258	0.225017	0.0132239	0.013468	5	0.0139167	0.0161357	0.0379306	0.1987	0.0288712	5	0.00391978	0.00826638	0.0121216	0.0331024	0.0242354
6	0.00776891	0.0319058	0.174274	0.0157761	0.00723616	6	0.0241671	0.0479075	0.232128	0.0543346	0.0140507	6	0.0195995	0.0862708	0.0124061	0.117185	0.0183065	6	0.0130073	0.0673903	0.253983	0.0119402	0.0150503	6	0.0136609	0.0149811	0.0490678	0.220128	0.0273503	6	0.00465265	0.00837537	0.0177707	0.0411872	0.0234476
7	0.00954343	0.0382974	0.188298	0.0174098	0.00755355	7	0.0289728	0.0603035	0.24994	0.0535236	0.016138	7	0.0207794	0.0997324	0.0122407	0.134633	0.0173825	7	0.0149495	0.0909097	0.282044	0.0142506	0.0148247	7	0.0139747	0.0178219	0.0631702	0.240094	0.0283946	7	0.00440631	0.0100281	0.0264231	0.0476425	0.0218195
8	0.0115433	0.0441272	0.198353	0.0164848	0.00737711	8	0.0296636	0.0717531	0.263023	0.0565207	0.0131824	8	0.0228294	0.122662	0.0140679	0.142923	0.0165233	8	0.0167621	0.107265	0.305272	0.0134056	0.0131141	8	0.0125492	0.019323	0.0743818	0.255549	0.0288037	8	0.00379756	0.00932762	0.0316509	0.0538501	0.024053
9	0.0116984	0.0530973	0.207121	0.0180288	0.00589876	9	0.0326036	0.0866541	0.286932	0.0556678	0.0155729	9	0.023578	0.138657	0.0148533	0.154735	0.0174414	9	0.0211587	0.124147	0.320666	0.0160661	0.0143017	9	0.0133037	0.0218202	0.0879662	0.271573	0.0299209	9	0.00510225	0.0104683	0.0355431	0.0583096	0.022319
10	0.0134677	0.0574556	0.21867	0.0167738	0.00749508	10	0.0339601	0.098865	0.300303	0.0550485	0.014489	10	0.0288326	0.156706	0.0158425	0.16355	0.0176468	10	0.0239249	0.142198	0.345965	0.0132132	0.0147264	10	0.0135893	0.0237843	0.0995061	0.288313	0.0283452	10	0.00430912	0.0102469	0.0423747	0.0644888	0.0231942
11	0.0139069	0.0674403	0.229707	0.0172104	0.00711401	11	0.0352305	0.11746	0.313649	0.0542842	0.0139263	11	0.0289276	0.177528	0.0120992	0.170205	0.0172046	11	0.0248858	0.158232	0.361703	0.0159849	0.0115654	11	0.0124526	0.0246744	0.114377	0.301686	0.0291599	11	0.00424427	0.0106634	0.0454741	0.0668064	0.021767
12	0.017262	0.0735049	0.234782	0.0199303	0.0076924	12	0.0370531	0.131128	0.329545	0.0530288	0.0147141	12	0.0336775	0.185703	0.0122407	0.17776	0.0144482	12	0.027874	0.176273	0.375551	0.0172661	0.0142753	12	0.0127825	0.0273964	0.126968	0.313293	0.0300751	12	0.00339819	0.0099042	0.0515099	0.0717782	0.0199231
13	0.0182704	0.0840346	0.247032	0.0210208	0.00767988	13	0.041829	0.147408	0.341251	0.0557888	0.0124491	13	0.0378026	0.205907	0.0133341	0.184208	0.0128632	13	0.030993	0.189348	0.389392	0.0169124	0.0122528	13	0.0113112	0.0303641	0.140264	0.325892	0.0312407	13	0.00243425	0.0117919	0.0530191	0.072412	0.0213583
14	0.0193541	0.0893708	0.256116	0.022781	0.0104413	14	0.0436551	0.161359	0.356968	0.0545406	0.01241	14	0.0420708	0.214967	0.0151363	0.187056	0.0128356	14	0.0340208	0.207684	0.403482	0.0157028	0.0125395	14	0.0120566	0.0323434	0.152805	0.338856	0.0310081	14	0.00109148	0.012237	0.0596188	0.0753345	0.0206847
15	0.0219892	0.102177	0.26032	0.0257466	0.00859444	15	0.042062	0.172334	0.368837	0.0564788	0.0113841	15	0.0416021	0.235482	0.0139049	0.193057	0.012683	15	0.0373773	0.220244	0.417465	0.0175279	0.0137571	15	0.0116047	0.0338095	0.164918	0.348874	0.0332511	15	0.00222903	0.0105013	0.0593818	0.0804524	0.0205312
16	0.0247941	0.111345	0.274333	0.0252857	0.00517943	16	0.0478633	0.191705	0.383151	0.0604906	0.0104388	16	0.0486892	0.248076	0.0134001	0.197049	0.0165366	16	0.0397825	0.23412	0.430898	0.0188414	0.013354	16	0.0113772	0.03748	0.179057	0.362794	0.0348726	16	0.00482423	0.0117057	0.0623569	0.080243	0.0224186
17	0.0262636	0.116602	0.281915	0.0255124	0.00686345	17	0.0501627	0.203181	0.393475	0.0601731	0.0128768	17	0.0498572	0.262563	0.0152837	0.200417	0.0151403	17	0.0408334	0.248374	0.445497	0.0185881	0.0124687	17	0.0118373	0.0390866	0.189385	0.373629	0.0347579	17	0.00351796	0.012045	0.0669604	0.0835771	0.0222809
18	0.0277666	0.125679	0.291292	0.0296202	0.00831256	18	0.0544151	0.223132	0.407113	0.0639981	0.0112088	18	0.0551755	0.275858	0.015195	0.203568	0.0153926	18	0.0425392	0.259107	0.454006	0.0193817	0.0115666	18	0.0116201	0.0415736	0.202639	0.384137	0.0376667	18	0.00290653	0.0133504	0.069034	0.0837548	0.0233712
19	0.0283997	0.136506	0.293511	0.0320353	0.00769032	19	0.0559687	0.235973	0.422297	0.0630972	0.0126173	19	0.0593583	0.287867	0.0124157	0.207535	0.0159141	19	0.0508561	0.271448	0.470774	0.0192072	0.0147911	19	0.0127532	0.0450749	0.214643	0.395527	0.0381132	19	0.00364215	0.0146656	0.0699541	0.0916138	0.0225675
20	0.0332998	0.143138	0.309194	0.0305725	0.00625164	20	0.0596008	0.244982	0.433296	0.062339	0.0102315	20	0.061222	0.298554	0.0111244	0.206199	0.0167889	20	0.0502431	0.282331	0.477755	0.0216885	0.0133156	20	0.0116469	0.0477146	0.223484	0.406748	0.0382	20	0.00448467	0.0133316	0.0720439	0.08736	0.0213717
21	0.0342327	0.153884	0.312178	0.0307392	0.0046334	21	0.0638268	0.26064	0.442216	0.0651984	0.0088692	21	0.0656608	0.30394	0.0131519	0.214431	0.016396	21	0.0538131	0.289251	0.486242	0.0244267	0.0158156	21	0.0114285	0.0506242	0.234592	0.413545	0.0401214	21	0.00567585	0.0150526	0.0713443	0.0905047	0.0219454
22	0.0386098	0.161515	0.317654	0.0311347	0.00830629	22	0.0649407	0.278687	0.458066	0.0674792	0.0117514	22	0.0720197	0.31421	0.0157525	0.215548	0.0153241	22	0.0549168	0.302891	0.495629	0.026645	0.0145404	22	0.0124806	0.0528224	0.247698	0.423783	0.041753	22	0.00317727	0.0132898	0.075611	0.0938096	0.0223924
23	0.0363101	0.172633	0.328862	0.0384875	0.00652936	23	0.0684413	0.291574	0.462782	0.068828	0.00908006	23	0.0732177	0.31906	0.00927551	0.215749	0.0155909	23	0.0568805	0.306069	0.502545	0.0189693	0.013907	23	0.0112768	0.0538773	0.256759	0.431396	0.0420949	23	0.00419894	0.0162748	0.0732145	0.0909958	0.0251243
24	0.0418894	0.17764	0.340312	0.0734272	0.00742931	24	0.0703213	0.298605	0.472191	0.0795409	0.00936319	24	0.0777862	0.330229	0.0126747	0.217379	0.0165666	24	0.0613371	0.314376	0.502946	0.0227737	0.0136143	24	0.0117434	0.0578493	0.26354	0.438483	0.0585806	24	0.00412474	0.0145333	0.0748087	0.0863983	0.03116
25	0.0428202	0.186667	0.343308	0.0478969	0.00806095	25	0.0764368	0.311055	0.482871	0.0954131	0.00977662	25	0.0793687	0.341215	0.0133929	0.217911	0.014775	25	0.0611091	0.319543	0.505233	0.0309873	0.0129557	25	0.0113921	0.0601221	0.272421	0.443804	0.0580991	25	0.00303289	0.01683	0.074387	0.0877472	0.0334026
26	0.0425257	0.195825	0.350945	0.0522535	0.00892749	26	0.0784841	0.332099	0.490345	0.0770193	0.00806959	26	0.0868367	0.337651	0.013267	0.221165	0.0169127	26	0.0662686	0.326108	0.499719	0.0290486	0.0126942	26	0.011651	0.0624261	0.284678	0.447003	0.0527738	26	0.00404217	0.0182846	0.0770065	0.083321	0.0239896
27	0.0480631	0.206267	0.365107	0.0312739	0.00483699	27	0.0832109	0.343907	0.484981	0.0955281	0.0075223	27	0.0880347	0.347477	0.010917	0.22544	0.0157988	27	0.0689785	0.328619	0.513141	0.0265255	0.0112871	27	0.00986129	0.0667508	0.292931	0.45441	0.0511092	27	0.00476099	0.0176795	0.0754415	0.0786098	0.0385411
28	0.0480264	0.215172	0.365763	0.0444261	0.00768614	28	0.0815007	0.363278	0.513312	0.103614	0.00867611	28	0.0919267	0.338919	0.0143137	0.225305	0.0158072	28	0.0724586	0.33625	0.515777	0.0274841	0.0118041	28	0.0109934	0.0673286	0.3049	0.464951	0.058508	28	0.00365775	0.0173168	0.0788729	0.0859077	0.0399708
29	0.0530219	0.222277	0.373632	0.106848	0.00445069	29	0.0854112	0.38641	0.528011	0.147992	0.00552148	29	0.0969999	0.341687	0.013231	0.230232	0.01878	29	0.074384	0.345924	0.518532	0.0242391	0.0105397	29	0.00982297	0.070939	0.318204	0.473392	0.0930263	29	0.00653466	0.0164672	0.0855061	0.0865246	0.0630234
30	0.0543478	0.231611	0.377796	0.0851937	0.00411556	30	0.0921482	0.41415	0.517739	0.0961259	0.00695487	30	0.0965109	0.344085	0.0130068	0.230769	0.0137536	30	0.0767148	0.346695	0.518426	0.0263176	0.0130373	30	0.00946534	0.0744036	0.330819	0.47132	0.0692124	30	0.00469294	0.0190059	0.0922988	0.0809949	0.037548
31	0.056986	0.242643	0.39307	0.0224593	0.00350898	31	0.0922833	0.392385	0.545322	0.0454521	0.00903623	31	0.103453	0.347473	0.012297	0.228943	0.0134941	31	0.0773566	0.34713	0.522887	0.0226996	0.011557	31	0.00939907	0.075542	0.327386	0.487093	0.0302037	31	0.00433015	0.0177185	0.0767984	0.0821952	0.0132061
32	0.0576254	0.243775	0.415322	0.0864265	0.00406023	32	0.0967627	0.397071	0.563155	0.0443955	0.00827097	32	0.103141	0.344094	0.0134145	0.231001	0.0118539	32	0.0780932	0.350058	0.555837	0.0340494	0.010217	32	0.00860053	0.0774937	0.330301	0.511438	0.0549572	32	0.00336256	0.0195756	0.0785343	0.0833194	0.0277399
33	0.0600602	0.258176	0.40549	0.0855206	0.00325006	33	0.101034	0.510743	0.584643	0.0850141	0.00567075	33	0.108251	0.348468	0.0143173	0.234486	0.0135962	33	0.0796334	0.340632	0.546862	0.0297682	0.0121676	33	0.00867116	0.0802426	0.36985	0.512332	0.0667676	33	0.00499573	0.0204938	0.128794	0.0944366	0.0320435
34	0.0623766	0.264821	0.421898	0.136419	0.00177485	34	0.106332	0.423682	0.594066	0.156894	0.00601428	34	0.11338	0.327567	0.0108678	0.233462	0.0154443	34	0.0872677	0.343932	0.580359	0.0628913	0.0102374	34	0.00836772	0.0853255	0.344145	0.532108	0.118735	34	0.00584746	0.0220421	0.0794307	0.0956905	0.0494337
35	0.0652255	0.277901	0.395361	0.088539	0.00245869	35	0.106087	0.511225	0.620071	0.0937265	0.00810513	35	0.116146	0.338501	0.0107107	0.228671	0.0124066	35	0.0866032	0.369179	0.547802	0.0768216	0.00923217	35	0.00805065	0.085972	0.386102	0.521078	0.0863623	35	0.00414903	0.0204382	0.117579	0.114714	0.00866008
36	0.0684612	0.273734	0.411722	0.204382	0.000990783	36	0.11031	0.557343	0.649311	0.0772073	0.00500499	36	0.120193	0.330617	0.0103139	0.236041	0.0117481	36	0.0874141	0.369834	0.578322	0.0759084	0.00993514	36	0.00691976	0.0887283	0.400303	0.546451	0.119166	36	0.00487254	0.0209552	0.144239	0.121959	0.0738022
37	0.0698049	0.280137	0.446766	0.145823	-0.00072038	37	0.112613	0.546366	0.662029	0.035464	0.0030101	37	0.1199	0.332886	0.0140859	0.236456	0.0125965	37	0.0867855	0.354517	0.62253	0.0334901	0.0137715	37	0.00716442	0.0897344	0.393673	0.577108	0.0715924	37	0.00713183	0.0215557	0.137366	0.114595	0.0642932
38	0.070874	0.307818	0.439557	0.127595	-0.000207762	38	0.116643	0.53142	0.699279	0.0409839	0.00388553	38	0.121495	0.336142	0.0110189	0.234123	0.0110344	38	0.091903	0.365461	0.593043	0.020816	0.0101175	38	0.00620741	0.0931399	0.401566	0.577293	0.0631316	38	0.00532709	0.0229094	0.116091	0.130575	0.0567303
39	0.075074	0.293473	0.516432	0.0359226	-0.00051053	39	0.121274	0.534965	0.70837	0.0399202	0.00552622	39	0.126945	0.330022	0.0113702	0.229238	0.0163467	39	0.0918214	0.356721	0.548029	0.0378777	0.00769547	39	0.00726447	0.0960565	0.395053	0.590944	0.0379068	39	0.00697961	0.0233893	0.125226	0.102914	0.00199892
40	0.0779197	0.322677	0.558946	0.00577091	0.00034975	40	0.124934	0.468379	0.656779	0.0528587	0.00390804	40	0.12606	0.323916	0.0111651	0.227938	0.0145431	40	0.0922905	0.363303	0.571076	0.0423562	0.00802057	40	0.00670536	0.0983812	0.384787	0.5956	0.033662	40	0.00609312	0.0240914	0.0751894	0.0533281	0.0247186
