# Supplementary material for: Sec17/Sec18 can support membrane fusion without help from completion of SNARE zippering
Source: eLife journal article supplement (doi:10.7554/elife.67578), 2021-05-04
Supplement: supp [file elife-67578-supp-v1.zip › elife_poa_e67578_Figure_6_source_data_1.xlsx]

## Sheet: Figure6 A-C
	Replicate 1													Replicate 2													Replicate 3													Replicate 4
	No Sec17/18				with Sec17/18/ATP𝛾S				with Sec17/18/ATP					No Sec17/18				with Sec17/18/ATP𝛾S				with Sec17/18/ATP					No Sec17/18				with Sec17/18/ATP𝛾S				with Sec17/18/ATP					No Sec17/18				with Sec17/18/ATP𝛾S				with Sec17/18/ATP
Qa SNARE +4~+8 Heptad Repeats	w.t.	Gly	Ser	Ala	w.t.	Gly	Ser	Ala	w.t.	Gly	Ser	Ala	Qa SNARE +4~+8 Heptad Repeats	w.t.	Gly	Ser	Ala	w.t.	Gly	Ser	Ala	w.t.	Gly	Ser	Ala	Qa SNARE +4~+8 Heptad Repeats	w.t.	Gly	Ser	Ala	w.t.	Gly	Ser	Ala	w.t.	Gly	Ser	Ala	Qa SNARE +4~+8 Heptad Repeats	w.t.	Gly	Ser	Ala	w.t.	Gly	Ser	Ala	w.t.	Gly
0	0.036761	0.0258134	0.0250565	0.02812	0.108352	0.00175139	0.01801	0.11932	0.124153	0.000858192	0	0.0388335	0	0.0625963	0.0132913	0.0195433	0	0.0963172	0.0171809	0.0316369	0.101671	0.115669	0.00578191	0.0503293	0.0688043	0	0.0380266	0.00922717	0.0182161	0.00406581	0.0847332	0.00449386	0.025777	0.0661808	0.12289	0	0.0197149	0.035426	0	0.0434156	0.0199592	0.0148761	0.0138433	0.117761	0.01156	0.045431	0.111212	0.127572	0
1	0.0579696	0.0337531	0.02696	-0.00176104	0.172985	0.020529	0.0618345	0.173367	0.139641	-0.000276408	0.0121776	0.0668859	1	0.0857691	0.0132962	0.0155938	0.00355387	0.170878	0.0452994	0.0903424	0.154058	0.181558	0.00548037	0.0446816	0.111185	1	0.0306096	0.00802368	0.0138004	0.00513531	0.173389	0.0202757	0.0916563	0.139784	0.204715	-0.00593929	0.0324248	0.0595418	1	0.0614121	0.0172365	0.00974527	0.0150511	0.200256	0.0216197	0.108323	0.183053	0.189054	-0.0029576
2	0.078839	0.0296312	0.0280391	0.000601096	0.208089	0.0542363	0.112684	0.173607	0.201764	0.00326137	0.0306064	0.102078	2	0.104986	0.0115968	0.0150823	0.00775602	0.223843	0.0802533	0.136513	0.203388	0.239882	0.00541078	0.0615195	0.146385	2	0.0472302	0.00163154	0.0131168	0.00297026	0.244418	0.0456929	0.14695	0.1992	0.26281	-0.00852493	0.0173451	0.0808026	2	0.0740893	0.0143671	0.00964371	0.0145274	0.262803	0.0336324	0.160511	0.23923	0.246813	-0.00284013
3	0.0942804	0.0290301	0.022208	0.000843708	0.2544	0.0804407	0.149013	0.212059	0.247933	0.0049174	0.0454588	0.126942	3	0.126454	0.012322	0.0155047	0.0104284	0.282257	0.112719	0.18025	0.245304	0.288351	0.00677446	0.0811067	0.174751	3	0.0587886	0.000903238	-0.0117049	0.00048884	0.294668	0.0715469	0.189793	0.242952	0.313305	-0.00673706	0.0256827	0.104054	3	0.0889898	0.0103424	0.00683295	0.0157498	0.31481	0.0544188	0.200808	0.286518	0.296771	-0.00265535
4	0.11283	0.00739542	0.00112977	0.00537486	0.290016	0.113141	0.19087	0.249498	0.287158	0.00622581	0.0637935	0.15584	4	0.143703	0.00942003	0.0128042	0.0148271	0.31297	0.141999	0.21311	0.281663	0.327669	0.00707967	0.0930722	0.203526	4	0.0711734	-0.00374075	-0.0133848	0.00167	0.33744	0.1019	0.223808	0.284328	0.304826	-0.00907332	0.0378913	0.120803	4	0.103904	0.0106765	0.00368201	0.0163286	0.34901	0.0725707	0.233971	0.321172	0.331755	-0.00407113
5	0.12611	0.00573094	0.000724213	0.00550039	0.31604	0.139868	0.217219	0.274968	0.313792	0.00777563	0.0784153	0.177286	5	0.159889	0.00831883	0.00828953	0.0163752	0.339786	0.16656	0.242302	0.311808	0.350697	0.00976675	0.109877	0.228135	5	0.0828237	-0.0035596	-0.0160015	-0.000384621	0.359359	0.127724	0.256048	0.313675	0.329032	-0.0118066	0.0469485	0.136462	5	0.114369	0.00866477	0.00382273	0.0181005	0.377329	0.0909171	0.265412	0.351747	0.307078	-0.00309343
6	0.141442	0.0048474	0.00183588	0.00593492	0.34189	0.16572	0.24509	0.303573	0.314503	0.0108234	0.0946401	0.200988	6	0.15829	0.00471123	0.00709432	0.0189304	0.360343	0.193981	0.269948	0.332702	0.370492	0.00957751	0.127429	0.249942	6	0.0874292	-0.0092098	-0.019329	-5.5832e-05	0.385703	0.148739	0.283616	0.339673	0.347644	-0.0127334	0.0581596	0.149454	6	0.118344	0.00565089	-0.00017376	0.0177909	0.39834	0.113377	0.294267	0.376186	0.328564	-0.00330512
7	0.149783	0.00223661	-0.00011346	0.00450822	0.357068	0.1877	0.265226	0.321822	0.328685	0.0131336	0.108333	0.217319	7	0.162486	-0.00105481	0.00146867	0.0233352	0.37358	0.214173	0.28588	0.347658	0.369056	0.0098815	0.131949	0.260716	7	0.0981999	-0.0100473	-0.021504	-0.00210549	0.401107	0.175196	0.305168	0.35952	0.362032	-0.0118885	0.0712553	0.163449	7	0.131553	0.00563008	-0.00043073	0.0180001	0.4166	0.135254	0.319078	0.398936	0.346719	-0.00306283
8	0.163105	0.00330965	0.00138687	0.00721436	0.36705	0.206646	0.282898	0.333483	0.338641	0.0150841	0.120453	0.233149	8	0.165941	-0.000481012	0.00444509	0.0290365	0.390693	0.240704	0.304401	0.365392	0.385303	0.0115968	0.14821	0.277619	8	0.10374	-0.0124034	-0.0225239	-0.000707206	0.409087	0.193834	0.319231	0.371288	0.368143	-0.0152	0.0747913	0.17032	8	0.133716	0.00365142	-0.000872473	0.0200865	0.420017	0.152229	0.329531	0.41614	0.360551	-0.00280464
9	0.171763	0.00300307	-0.00337845	0.0072373	0.378	0.224829	0.301671	0.348414	0.345099	0.0173413	0.130693	0.243465	9	0.163075	-0.00123183	0.000831394	0.0279305	0.400151	0.264921	0.3262	0.383702	0.397079	0.0152434	0.16493	0.291688	9	0.112446	-0.0132756	-0.0236256	-0.000423083	0.420182	0.217192	0.33681	0.384643	0.378446	-0.0167769	0.0876079	0.184225	9	0.14668	0.00179145	-0.0040075	0.0216454	0.426758	0.170951	0.350135	0.428597	0.361777	0.000340179
10	0.17994	0.0025963	-0.000812325	0.0102802	0.390874	0.246472	0.314959	0.360081	0.355938	0.0222768	0.143798	0.258764	10	0.170492	-0.00302037	-0.00119276	0.0344937	0.405938	0.28158	0.342146	0.385231	0.401302	0.0169075	0.170703	0.303455	10	0.118966	-0.0171777	-0.0241207	0.00029653	0.42611	0.235607	0.349176	0.391432	0.378175	-0.0128836	0.0923784	0.19191	10	0.148029	-4.28283e-05	-0.000896947	0.0226831	0.432858	0.192195	0.360519	0.383733	0.367721	-0.0030922
11	0.188418	0.00114184	-0.00274477	0.00913232	0.395217	0.25494	0.325547	0.368188	0.359543	0.0258809	0.157776	0.268684	11	0.180098	-0.00375409	-0.00444875	0.039421	0.410805	0.298933	0.353728	0.396575	0.404203	0.0193528	0.184726	0.313459	11	0.124169	-0.0201417	-0.0264693	0.000117868	0.436343	0.248271	0.360184	0.399561	0.383402	-0.0156181	0.0997334	0.200654	11	0.153106	-0.0020166	-0.017633	0.0230233	0.436372	0.206936	0.367169	0.387548	0.377395	-0.000840658
12	0.176965	-0.000615581	-0.00495844	0.01011	0.394842	0.274856	0.335884	0.373433	0.366345	0.0283541	0.164868	0.276089	12	0.188026	-0.00424609	-0.00195579	0.0421447	0.422452	0.319224	0.362169	0.407677	0.413075	0.0229995	0.192416	0.325019	12	0.127005	-0.0212646	-0.0279495	0.000739464	0.433944	0.265418	0.371766	0.399533	0.388281	-0.0162732	0.105437	0.20618	12	0.153593	-0.00283646	-0.0183415	0.0238211	0.43911	0.225222	0.381237	0.395385	0.380961	0.0016703
13	0.181704	-0.00132048	-0.00365245	0.0113581	0.401921	0.289861	0.345937	0.381662	0.372619	0.0303783	0.176085	0.288261	13	0.199624	-0.00565006	-0.0035319	0.0466155	0.42917	0.335814	0.370637	0.415369	0.412591	0.0262323	0.205794	0.333705	13	0.131041	-0.0227683	-0.0289706	0.00124319	0.434712	0.281922	0.370107	0.406355	0.38767	-0.0168005	0.113926	0.214015	13	0.164485	-0.00399282	-0.0203961	0.0222572	0.443837	0.242075	0.386977	0.401024	0.385046	0.00217078
14	0.186929	-0.00161499	-0.00455409	0.0107087	0.407064	0.300528	0.349785	0.3839	0.375334	0.0347948	0.184977	0.29142	14	0.202686	-0.00765102	-0.00656936	0.0510288	0.428052	0.345241	0.370553	0.420443	0.414333	0.0282173	0.211688	0.335379	14	0.137406	-0.022112	-0.0315538	0.00260922	0.437267	0.294979	0.381999	0.406308	0.39226	-0.0151193	0.121329	0.225502	14	0.163438	-0.00698713	-0.0214288	0.0220088	0.433811	0.252097	0.388154	0.395715	0.381872	-0.00161524
15	0.195763	-0.0020459	-0.00449857	0.0137552	0.417576	0.310417	0.353338	0.391886	0.378871	0.0369059	0.19431	0.304458	15	0.204396	-0.0115553	-0.00754359	0.0528344	0.42931	0.351056	0.376897	0.416207	0.409785	0.0308495	0.216291	0.338254	15	0.141101	-0.0268899	-0.0323019	0.00104096	0.438159	0.300773	0.384191	0.409167	0.400842	-0.0163154	0.127543	0.226707	15	0.171268	-0.00775437	-0.0218498	0.0267493	0.445817	0.27386	0.394411	0.410408	0.393334	0.00402831
16	0.201903	-0.00340863	-0.00588181	0.0167631	0.420098	0.317653	0.355138	0.396564	0.385246	0.0376675	0.198404	0.30912	16	0.212335	-0.010719	-0.00879373	0.0564139	0.437339	0.359663	0.378168	0.427499	0.416069	0.0305443	0.228165	0.34539	16	0.149746	-0.0290029	-0.0326233	0.00182881	0.439553	0.31246	0.388492	0.416323	0.398072	-0.0136143	0.13357	0.233769	16	0.169542	-0.00741786	-0.0206053	0.0294867	0.445769	0.283151	0.40092	0.411347	0.393577	0.00403932
17	0.20684	-0.00129996	-0.00762113	0.0175018	0.419913	0.325823	0.359607	0.402467	0.389174	0.0444763	0.208111	0.312522	17	0.216426	-0.0117299	-0.00991569	0.0580755	0.453635	0.367996	0.380158	0.440149	0.425326	0.035789	0.232851	0.350679	17	0.149634	-0.029117	-0.0339322	0.00582266	0.447349	0.320576	0.387314	0.417481	0.400705	-0.0149419	0.137729	0.239336	17	0.175797	-0.0069235	-0.0208305	0.0310505	0.453649	0.299233	0.407215	0.419503	0.400982	0.0074252
18	0.212647	-0.00217143	-0.0100098	0.0186388	0.426618	0.33518	0.362961	0.401636	0.394989	0.0477413	0.213731	0.323785	18	0.223798	-0.0147002	-0.0127126	0.0640845	0.458307	0.375562	0.385037	0.4608	0.424266	0.0390536	0.242171	0.355102	18	0.1571	-0.0267634	-0.0336109	0.00419112	0.448834	0.329156	0.396313	0.421601	0.40722	-0.0155498	0.146382	0.24717	18	0.174491	-0.00970856	-0.0234173	0.0299455	0.454819	0.298644	0.406062	0.420581	0.398272	0.00309343
19	0.216293	-0.00197469	-0.0061377	0.0191482	0.433636	0.337069	0.364516	0.407469	0.397349	0.0506695	0.219772	0.323412	19	0.228987	-0.0126821	-0.0121254	0.0683452	0.451824	0.376078	0.390097	0.453956	0.433598	0.0436903	0.248669	0.362914	19	0.155383	-0.0310786	-0.0358553	0.00576187	0.45366	0.333537	0.395692	0.42043	0.404314	-0.0137235	0.147753	0.248574	19	0.183945	-0.00532294	-0.0236951	0.0330231	0.467067	0.320457	0.409075	0.437797	0.407648	0.00836498
20	0.222109	-0.00424268	-0.00778529	0.0201174	0.446922	0.346678	0.365959	0.415148	0.399506	0.0498753	0.224605	0.326242	20	0.229832	-0.0159296	-0.015263	0.0675224	0.461351	0.387364	0.384901	0.438905	0.437404	0.0412144	0.250709	0.364036	20	0.153343	-0.0332349	-0.0383765	0.00590579	0.458574	0.335434	0.398675	0.419142	0.405811	-0.0156578	0.152766	0.252711	20	0.185252	-0.00798809	-0.0233084	0.0363783	0.484093	0.323666	0.423437	0.450464	0.409944	0.0110974
21	0.226155	-0.00452874	-0.00876539	0.0241863	0.45133	0.352135	0.371258	0.416052	0.404508	0.0549436	0.231734	0.328526	21	0.231825	-0.0167719	-0.016131	0.072512	0.458004	0.380017	0.387366	0.450249	0.439217	0.046447	0.255892	0.36715	21	0.160154	-0.0326766	-0.0394062	0.00678173	0.479313	0.341422	0.398569	0.425856	0.404063	-0.0104021	0.161257	0.257088	21	0.185142	-0.00827198	-0.0246336	0.0378272	0.487711	0.332711	0.420812	0.487784	0.409219	0.0106141
22	0.231608	-0.00705987	-0.00684381	0.0238012	0.451545	0.353707	0.369304	0.42769	0.40645	0.0580432	0.235024	0.336714	22	0.240225	-0.0157647	-0.0152581	0.0769888	0.500794	0.39653	0.397925	0.473383	0.458869	0.0505649	0.267213	0.374865	22	0.16334	-0.0332101	-0.0393579	0.00801003	0.443984	0.344651	0.399953	0.431431	0.40857	-0.0106726	0.163299	0.261837	22	0.185535	-0.0085265	-0.0269524	0.0384439	0.46832	0.334436	0.436786	0.490723	0.418635	0.0143193
23	0.235229	-0.00714315	-0.00901886	0.0231386	0.439268	0.356721	0.367113	0.43329	0.4097	0.0588169	0.237903	0.346127	23	0.241772	-0.0176925	-0.0154974	0.078101	0.515203	0.392231	0.385888	0.494156	0.442506	0.0524059	0.26819	0.380344	23	0.165898	-0.0306505	-0.0388641	0.00994679	0.456308	0.34943	0.404499	0.433564	0.419853	-0.00858697	0.170951	0.265583	23	0.18545	-0.00884955	-0.0273049	0.0390264	0.455113	0.346027	0.456499	0.493641	0.433185	0.0161475
24	0.235818	-0.00720712	-0.0123297	0.0264253	0.46741	0.360904	0.364965	0.440009	0.414967	0.0646384	0.239521	0.342303	24	0.244249	-0.0167683	-0.0178695	0.0831187	0.570168	0.397061	0.390076	0.535213	0.458329	0.0548708	0.274897	0.385946	24	0.166554	-0.036338	-0.0370563	0.0106974	0.475212	0.355001	0.416765	0.43123	0.415581	-0.00827803	0.176531	0.267102	24	0.18748	-0.0107107	-0.0259674	0.0417833	0.490089	0.352942	0.445035	0.489078	0.441741	0.0179524
25	0.240981	-0.0072542	-0.0119073	0.0290892	0.496649	0.359815	0.372113	0.425582	0.416953	0.0651115	0.242942	0.343888	25	0.246995	-0.0173909	-0.0163923	0.0855713	0.634206	0.404215	0.398942	0.551913	0.460661	0.0564652	0.277	0.396068	25	0.170765	-0.0356866	-0.0407127	0.0115188	0.490797	0.357738	0.424232	0.450349	0.411262	-0.00958202	0.177061	0.266765	25	0.189899	-0.0124361	-0.0270503	0.0426704	0.557179	0.35707	0.464285	0.504565	0.439363	0.0189815
26	0.24336	-0.00757164	-0.0111794	0.0296094	0.477175	0.360448	0.373537	0.436275	0.418293	0.0665455	0.24129	0.341407	26	0.251018	-0.020299	-0.0195323	0.0897332	0.62372	0.407439	0.402599	0.552402	0.465349	0.0605673	0.2805	0.409079	26	0.169604	-0.0347461	-0.0389335	0.0118128	0.496203	0.359921	0.417194	0.44688	0.409605	-0.00693682	0.183503	0.267543	26	0.192128	-0.0114303	-0.0260017	0.0428785	0.600571	0.365319	0.46959	0.556966	0.446174	0.0212636
27	0.251655	-0.00709246	-0.00921198	0.032913	0.480376	0.366887	0.374022	0.43887	0.420354	0.0699891	0.245016	0.353946	27	0.250358	-0.0213037	-0.0209863	0.0895354	0.605002	0.41161	0.403644	0.579324	0.452154	0.0628917	0.286995	0.390611	27	0.17633	-0.0374248	-0.0377784	0.0141987	0.480976	0.366081	0.449934	0.453238	0.42158	-0.00549511	0.185261	0.276903	27	0.198443	-0.0146326	-0.0273489	0.0468909	0.625777	0.369565	0.478464	0.568413	0.459992	0.0216087
28	0.252737	-0.00917215	-0.0099531	0.0316215	0.500495	0.369887	0.386149	0.457362	0.423524	0.0752903	0.250446	0.352453	28	0.253326	-0.0213318	-0.0193052	0.0912336	0.644409	0.42142	0.408823	0.566304	0.464677	0.0625926	0.285752	0.409432	28	0.178543	-0.0379894	-0.0400328	0.0170623	0.551824	0.368496	0.459937	0.505347	0.425248	-0.0028524	0.191443	0.277508	28	0.19569	-0.0130137	-0.027962	0.0482332	0.621108	0.370299	0.493564	0.565372	0.460254	0.0225485
29	0.2539	-0.00986619	-0.01169	0.0354937	0.539231	0.369056	0.390919	0.483868	0.416871	0.0752578	0.250218	0.354006	29	0.261988	-0.020172	-0.0187021	0.0980191	0.574181	0.42328	0.421248	0.594254	0.4672	0.0697785	0.297197	0.433408	29	0.1786	-0.0382673	-0.0389062	0.0154518	0.627779	0.366098	0.490637	0.461041	0.426331	-0.00583631	0.190312	0.279437	29	0.196289	-0.0154818	-0.0293986	0.050858	0.622136	0.37647	0.484132	0.625508	0.471794	0.023
30	0.260105	-0.00893678	-0.0125361	0.0343663	0.58959	0.365228	0.403635	0.450067	0.431349	0.0793278	0.248562	0.364011	30	0.261848	-0.0205089	-0.0204503	0.0978396	0.549691	0.431528	0.414506	0.597132	0.451895	0.0684771	0.297725	0.414839	30	0.180999	-0.0384087	-0.0397437	0.0193092	0.650587	0.371928	0.458818	0.448282	0.441375	-0.00332759	0.195554	0.279179	30	0.19697	-0.0177762	-0.0304521	0.0513609	0.651504	0.369902	0.499793	0.531521	0.477364	0.0226035
31	0.260892	-0.0105071	-0.0124939	0.0373235	0.559208	0.368636	0.393728	0.479128	0.441245	0.078635	0.250642	0.366904	31	0.267758	-0.0226967	-0.0219129	0.102946	0.621992	0.43317	0.436257	0.659131	0.460529	0.069068	0.301998	0.426657	31	0.18203	-0.0394422	-0.0399633	0.0219035	0.589017	0.371506	0.436077	0.492662	0.450873	-0.0012829	0.195638	0.281861	31	0.19962	-0.0153374	-0.0270063	0.0498252	0.666075	0.378738	0.481192	0.691536	0.47405	0.0301181
32	0.264239	-0.00672311	-0.0127196	0.0405462	0.516681	0.36342	0.402073	0.505616	0.441418	0.0809621	0.251623	0.390232	32	0.266421	-0.0237051	-0.0220472	0.103867	0.643436	0.453718	0.434071	0.67159	0.470186	0.0746949	0.302921	0.448157	32	0.183427	-0.0396432	-0.0401097	0.0328441	0.541603	0.380349	0.465788	0.56056	0.440656	-0.000333751	0.205597	0.28692	32	0.201112	-0.0153974	-0.0291893	0.0539416	0.679549	0.390923	0.537054	0.728028	0.48434	0.0290523
33	0.267454	-0.00812204	-0.0139761	0.038609	0.58966	0.365014	0.412804	0.49766	0.432001	0.0830744	0.250191	0.407986	33	0.273918	-0.0217823	-0.0198363	0.107297	0.698841	0.484852	0.431986	0.573279	0.513454	0.0771903	0.307804	0.430296	33	0.18596	-0.041111	-0.0418715	0.0308069	0.512862	0.376094	0.479124	0.610185	0.426072	-0.000327548	0.201575	0.289164	33	0.197857	-0.0200877	-0.0294071	0.0523386	0.721106	0.389194	0.624441	0.61833	0.485456	0.0285249
34	0.26969	-0.0100291	-0.0133424	0.0414974	0.556164	0.364995	0.41316	0.528559	0.427106	0.0838638	0.250039	0.421582	34	0.276991	-0.0221473	-0.0235122	0.112884	0.758515	0.488613	0.501071	0.591275	0.5138	0.0785613	0.310602	0.426426	34	0.189354	-0.0403641	-0.0405725	0.0332176	0.556046	0.39036	0.50998	0.656229	0.458627	0.00462041	0.212059	0.300536	34	0.205893	-0.0183905	-0.0276561	0.0524965	0.772801	0.402582	0.583563	0.521212	0.489175	0.0326731
35	0.271673	-0.00842863	-0.0143165	0.0412029	0.615856	0.366587	0.432493	0.511744	0.443668	0.0850262	0.250622	0.44562	35	0.275975	-0.0250554	-0.0211145	0.112112	0.690138	0.483415	0.498082	0.663456	0.483863	0.0781584	0.31451	0.436743	35	0.192821	-0.0394187	-0.0413963	0.0340042	0.568138	0.38576	0.535773	0.677177	0.441649	0.00141937	0.210762	0.296693	35	0.207348	-0.0156666	-0.027289	0.0571023	0.797352	0.413667	0.610309	0.597351	0.519593	0.0334464
36	0.278955	-0.00951615	-0.0116562	0.0457727	0.559317	0.372157	0.443718	0.548741	0.456433	0.0857745	0.255768	0.457127	36	0.277484	-0.0245292	-0.0217737	0.116108	0.690519	0.513333	0.475139	0.765625	0.503025	0.0811946	0.314992	0.411511	36	0.18756	-0.041549	-0.0418232	0.0323267	0.518019	0.397226	0.491033	0.719136	0.430665	0.00455713	0.211486	0.298508	36	0.202635	-0.0194404	-0.0274493	0.0596317	0.829931	0.415296	0.562209	0.766373	0.520867	0.0332054
37	0.281407	-0.00806411	-0.0134245	0.04676	0.623551	0.379147	0.441484	0.557505	0.450192	0.0870757	0.251969	0.441387	37	0.283892	-0.0226869	-0.0234097	0.111945	0.681527	0.560886	0.4834	0.794011	0.50247	0.0827939	0.317521	0.406646	37	0.199415	-0.0392288	-0.0412648	0.0346531	0.468202	0.420601	0.498854	0.668026	0.437099	0.00368119	0.212804	0.300636	37	0.210291	-0.0201856	-0.0284086	0.0580495	0.857786	0.433755	0.478055	0.83901	0.534149	0.0339641
38	0.275606	-0.00973583	-0.0152278	0.0463532	0.687536	0.372359	0.446642	0.537124	0.414324	0.0882646	0.244157	0.442012	38	0.285384	-0.0233669	-0.0224013	0.118074	0.639712	0.51487	0.47834	0.873867	0.527584	0.0863344	0.322784	0.434555	38	0.204107	-0.0406519	-0.0427884	0.0376283	0.435353	0.404064	0.511299	0.620977	0.452596	0.00815148	0.218987	0.317509	38	0.209595	-0.019088	-0.0277588	0.0617816	0.908028	0.432562	0.476313	0.994434	0.510429	0.0354263
39	0.27994	-0.00924337	-0.0144118	0.0475373	0.708548	0.381786	0.460654	0.540808	0.447363	0.0905036	0.250319	0.46101	39	0.293098	-0.0235012	-0.0232937	0.123637	0.598009	0.475897	0.531036	0.852014	0.526725	0.0883304	0.324468	0.446096	39	0.203088	-0.039905	-0.0415998	0.0372449	0.40258	0.411032	0.505719	0.631961	0.449855	0.00570479	0.217157	0.32611	39	0.212883	-0.0210128	-0.0293398	0.064787	1.00058	0.435176	0.455558	0.718216	0.551073	0.0382175
40	0.284881	-0.00995792	-0.0147957	0.0509882	0.664831	0.376295	0.454161	0.568387	0.447137	0.0914656	0.244085	0.488491	40	0.283599	-0.0248027	-0.0222584	0.122867	0.641498	0.501986	0.561241	0.719805	0.526867	0.0869961	0.32361	0.418252	40	0.207106	-0.0428182	-0.0413852	0.0369273	0.360028	0.401456	0.533922	0.630304	0.442337	0.00725444	0.22168	0.316413	40	0.2081	-0.0170897	-0.0320258	0.0625342	1.00814	0.465619	0.537271	0.8059	0.550877	0.0356711
[truncated: 28 more columns]

## Sheet: Figure6 D-F
	Replicate 1													Replicate 2													Replicate 3													Replicate 4
	No Sec17/18				with Sec17/18/ATP𝛾S				with Sec17/18/ATP					No Sec17/18				with Sec17/18/ATP𝛾S				with Sec17/18/ATP					No Sec17/18				with Sec17/18/ATP𝛾S				with Sec17/18/ATP					No Sec17/18				with Sec17/18/ATP𝛾S				with Sec17/18/ATP
Qa SNARE +4~+8 Heptad Repeats	w.t.	Gly	Ser	Ala	w.t.	Gly	Ser	Ala	w.t.	Gly	Ser	Ala	Qa SNARE +4~+8 Heptad Repeats	w.t.	Gly	Ser	Ala	w.t.	Gly	Ser	Ala	w.t.	Gly	Ser	Ala	Qa SNARE +4~+8 Heptad Repeats	w.t.	Gly	Ser	Ala	w.t.	Gly	Ser	Ala	w.t.	Gly	Ser	Ala	Qa SNARE +4~+8 Heptad Repeats	w.t.	Gly	Ser	Ala	w.t.	Gly	Ser	Ala	w.t.	Gly
0	0.0413907	0.0532672	0.0248779	0.0162107	0.0225681	0.00728183	0.0186889	0.00836748	0.0263684	0.00253079	0	0.00482271	0	0.0134376	0.0289609	0.000285675	0.0137269	0.0162677	0.0134872	0	0.0183667	0.00703777	0.0320174	0.0174007	0.018052	0	0.0183004	0.0133891	0.0153853	0.0401796	0.0149055	0.0181176	0.0069933	0.0363983	0.0208118	0	0.0259316	0.0107795	0	0.0333949	0.0427463	0.014905	0.0109519	0.0294639	0.00867642	0.00636548	0.0183237	0.00845388	0.0064364
1	0.0182362	0.0512475	0.0249842	0.0217703	0.0428012	0.0165033	0.0326852	0.0408461	0.0294271	0.00172461	0.00203156	0.00614603	1	0.0180568	0.0289173	-0.00443159	0.00749897	0.0748202	0.0282564	0.0327776	0.0610134	0.0117865	0.0267893	0.0136712	0.0112854	1	0.00342549	0.00856127	-0.00982006	-0.00305374	0.0175973	0.0209873	0.0153742	-0.00497015	0.000824473	-0.00221086	0.00428554	0.00677123	1	0.0237	0.0155591	0.0122969	0.0066895	0.0381305	0.00828148	0.0223599	0.0129706	0.00262518	0.000468302
2	0.0197136	0.0175686	0.024903	0.0140728	0.100719	0.0344087	0.0586357	0.0842959	0.0320726	-0.000274696	0.000432348	0.00755534	2	0.0133069	0.025396	-0.006556	0.0039365	0.129695	0.0456438	0.0720276	0.0996836	0.0119039	0.0230331	0.0120952	0.0108738	2	0.00423769	0.00754908	-0.0130996	-0.00303902	0.0358768	0.0340831	0.0372902	0.00992803	0.00324146	-0.0049039	0.00221454	0.00405979	2	0.00801615	0.0145271	0.0107012	0.00465978	0.0640485	0.0168136	0.0520573	0.0313652	0.00165189	0.00130586
3	0.0182482	0.0186029	0.0240371	0.00196467	0.140864	0.0546251	0.0818941	0.118793	0.0405404	0.00234686	6.56882e-05	0.00978396	3	0.00894429	0.0255885	-0.00552829	0.00383603	0.174191	0.0709357	0.110534	0.141604	0.0190228	0.0208288	0.0137209	0.0145924	3	-9.81516e-06	0.00387821	-0.0138296	-0.00588173	0.0541171	0.0428935	0.0593903	0.0258298	0.00151767	-0.00909129	-0.00324146	0.00229797	3	0.00671029	0.0137006	0.00706487	0.000950053	0.08869	0.0256514	0.0780523	0.052753	-6.23587e-05	0.000486642
4	0.0179735	0.0181001	0.0223973	0.00510338	0.181044	0.0750828	0.112283	0.152953	0.054649	0.00502574	0.00348028	0.0141039	4	0.00801221	0.0247944	-0.00873124	0.00425728	0.213285	0.0888872	0.140201	0.173508	0.0260509	0.0228734	0.0146953	0.0140876	4	-0.00150785	0.00232374	-0.0130272	-0.0063455	0.0758147	0.05662	0.0863182	0.0427794	0.00437143	-0.00845698	-0.00169189	-0.00143424	4	0.00440913	0.0100226	0.00408144	-0.00152595	0.114416	0.0320952	0.103711	0.0754235	0.000842454	-0.00384423
5	0.0151107	0.0194282	0.0196993	0.00473791	0.210692	0.0874596	0.134439	0.178853	0.062184	0.00422793	0.00460415	0.0148228	5	0.0078149	0.0200929	-0.00921907	0.00340752	0.250199	0.106909	0.176006	0.206263	0.0369162	0.0201558	0.0130914	0.0170957	5	-0.00344144	0.00242312	-0.017417	-0.00790243	0.0952181	0.0658229	0.103503	0.0587302	0.00236545	-0.0100814	-0.00203664	-0.00280345	5	0.00124106	0.010409	0.00701352	-0.00220334	0.142361	0.0420395	0.124582	0.0918898	0.000267776	-0.00133399
6	0.0145708	0.0185993	0.0196527	0.00203395	0.241239	0.110615	0.159818	0.208617	0.0760777	0.00631801	0.00664406	0.0219829	6	0.00443522	0.0185713	-0.00991631	-6.77873e-05	0.27925	0.127964	0.198882	0.229795	0.0494423	0.0204851	0.0150621	0.019628	6	-0.00622894	0.000506707	-0.0186513	-0.00796132	0.115721	0.0772993	0.123518	0.0752921	0.00477385	-0.00963112	-0.00321446	-0.00386349	6	-6.35814e-05	0.00731798	0.00086324	-0.00620286	0.168826	0.0524229	0.142672	0.105952	0.00309226	-0.003563
7	0.0151632	0.01762	0.0181837	0.00227759	0.267862	0.127682	0.181802	0.229995	0.0881476	0.00746098	0.00951046	0.0244205	7	0.00229992	0.013227	-0.00985336	-0.00295601	0.29314	0.138746	0.215039	0.250119	0.0564172	0.017103	0.0125636	0.0206412	7	-0.00829994	-0.00298135	-0.0194193	-0.0127695	0.137881	0.0888603	0.139149	0.0897387	0.00749878	-0.0111218	-0.0060081	-0.0057983	7	-0.00247112	0.00522101	-0.000122272	-0.00680199	0.188496	0.0609171	0.163045	0.12632	0.00372685	-0.00420616
8	0.0141277	0.015328	0.0153686	0.0035173	0.285398	0.141921	0.200172	0.251908	0.0991091	0.00651746	0.0124605	0.0283713	8	0.000826762	0.0124305	-0.0111558	-0.00334457	0.322275	0.161308	0.23847	0.272013	0.0669581	0.0183062	0.0186972	0.0272456	8	-0.0110727	-0.00588419	-0.0219271	-0.0140798	0.156524	0.0987662	0.155029	0.102125	0.00763128	-0.0132419	-0.00614429	-0.00753804	8	-0.00355445	0.00368772	0.000473192	-0.00793178	0.212298	0.0751973	0.181315	0.142421	0.00209941	-0.00437245
9	0.0139665	0.0150832	0.0136034	-0.000329635	0.30379	0.158073	0.216471	0.264645	0.109949	0.00974216	0.0137706	0.0309391	9	0.00278654	0.0130164	-0.0123506	-0.00202514	0.340194	0.179423	0.256293	0.290189	0.0828251	0.0177675	0.0219134	0.0325633	9	-0.0116445	-0.00479102	-0.0203566	-0.0141436	0.173731	0.110287	0.170825	0.11677	0.0142123	-0.0109733	-0.00632341	-0.00967161	9	-0.00647063	0.00152962	-0.00327689	-0.00817021	0.226389	0.0805992	0.196144	0.151231	0.00672129	-0.00558538
10	0.0113115	0.0157305	0.0142078	0.00170909	0.324089	0.173678	0.237844	0.286293	0.121895	0.012132	0.0164961	0.0376083	10	-0.000576192	0.0107854	-0.0117575	-0.00375735	0.355775	0.191049	0.275243	0.31103	0.0909414	0.0196305	0.0227487	0.0357699	10	-0.0126849	-0.00885818	-0.0220166	-0.013978	0.192343	0.119345	0.18559	0.130662	0.0188365	-0.0139265	-0.00347825	-0.00746933	10	-0.00820689	0.00106254	-0.00695483	-0.0118457	0.243546	0.0904592	0.203024	0.168146	0.00783886	-0.00584093
11	0.0113115	0.0126277	0.0122395	0.000627024	0.333411	0.187288	0.253039	0.298887	0.131745	0.0130421	0.0219482	0.0454132	11	-0.00307222	0.0107842	-0.013302	-0.00388808	0.366284	0.205435	0.28648	0.320094	0.102433	0.0196644	0.0238877	0.0422351	11	-0.0165484	-0.00936857	-0.0236496	-0.0172919	0.207402	0.132697	0.200089	0.144155	0.0228963	-0.0125708	-0.00781041	-0.0106801	11	-0.0124717	0.00118726	-0.00657945	-0.0118885	0.258768	0.0993142	0.220966	0.175529	0.00658435	-0.00421716
12	0.0109353	0.0126193	0.0121237	-0.000324858	0.340505	0.20083	0.26238	0.304157	0.144435	0.0152683	0.0234841	0.0507901	12	-0.0027236	0.00797953	-0.0117926	-0.00485526	0.38002	0.223302	0.301368	0.336456	0.11487	0.0200093	0.0270096	0.0454163	12	-0.0180464	-0.00999306	-0.0240815	-0.0162441	0.224334	0.141112	0.210503	0.153931	0.0261132	-0.0151939	-0.00961517	-0.0104016	12	-0.0102635	-0.00168613	-0.0091973	-0.0161411	0.273964	0.111045	0.231815	0.190847	0.0123947	-0.00528948
13	0.00953554	0.0120759	0.0139665	-0.00147858	0.35021	0.212604	0.278321	0.314822	0.153728	0.019132	0.0291226	0.0575632	13	-0.0024706	0.0102117	-0.0115311	-0.00500536	0.387662	0.237721	0.3143	0.347252	0.128542	0.0213167	0.0322692	0.0533728	13	-0.0179838	-0.0128333	-0.0251599	-0.0183016	0.233136	0.149247	0.218792	0.16244	0.028767	-0.0137608	-0.0049542	-0.0139584	13	-0.0133374	-0.00153696	-0.0109238	-0.0128496	0.285313	0.116635	0.236215	0.198663	0.0144978	-0.00305191
14	0.0105579	0.0121141	0.0112172	0.00167445	0.35904	0.222087	0.290736	0.323647	0.165416	0.0217141	0.033108	0.06211	14	-0.00651605	0.00811994	-0.0148563	-0.00624006	0.390593	0.241387	0.322526	0.356868	0.135375	0.0207841	0.033585	0.0560552	14	-0.0201603	-0.0136529	-0.0253832	-0.0193862	0.248754	0.15939	0.230975	0.175999	0.0362155	-0.0155509	-0.0077233	-0.0122861	14	-0.0156423	-0.00693037	-0.0108895	-0.0170019	0.289012	0.12235	0.249216	0.208288	0.014109	-0.00492267
15	0.0106761	0.0137885	0.0124664	0.00268724	0.366304	0.22861	0.300243	0.329395	0.172485	0.0223268	0.0346451	0.0685223	15	-0.00431054	0.00167168	-0.0137172	-0.00798437	0.388573	0.253315	0.329045	0.358027	0.143851	0.0222887	0.0334518	0.0606672	15	-0.021494	-0.0161361	-0.0288026	-0.019596	0.261649	0.165566	0.240531	0.186098	0.041047	-0.0140479	-0.00675651	-0.0135658	15	-0.0146959	-0.00493245	-0.0131626	-0.0146029	0.313016	0.135196	0.26365	0.222475	0.0224296	-0.00351776
16	0.0120329	0.0121392	0.0108135	9.07691e-05	0.370946	0.243781	0.310998	0.336928	0.182902	0.0251992	0.037994	0.0711881	16	-0.00662499	0.00355883	-0.0149677	-0.00673757	0.401268	0.265265	0.333446	0.371572	0.155756	0.0227354	0.0402366	0.0631959	16	-0.022489	-0.0169606	-0.0269193	-0.019753	0.270666	0.154003	0.249085	0.193892	0.0462834	-0.0147313	-0.00624367	-0.0136517	16	-0.0146311	-0.00712234	-0.014411	-0.016585	0.317288	0.144951	0.270955	0.229264	0.0228049	-0.00211164
17	0.0084905	0.01078	0.00979829	0.000665242	0.371537	0.252305	0.323026	0.343923	0.1927	0.027269	0.0464416	0.0789297	17	-0.00524383	0.00220914	-0.0134437	-0.00826278	0.402017	0.270504	0.340988	0.373613	0.163741	0.0272468	0.0434093	0.0707711	17	-0.0225209	-0.0167471	-0.0266261	-0.0234668	0.283216	0.161118	0.259543	0.206162	0.054587	-0.0151117	-0.00648536	-0.0150675	17	-0.0130036	-0.00775571	-0.0124827	-0.0165104	0.326445	0.152593	0.276443	0.237286	0.0274476	-0.000792322
18	0.00994041	0.0106713	0.00830657	0.00186674	0.380852	0.26329	0.320078	0.344541	0.198671	0.0311183	0.047065	0.0854914	18	-0.00608391	0.00164747	-0.0145246	-0.006349	0.409154	0.279258	0.347045	0.378874	0.17269	0.028783	0.0457976	0.0724416	18	-0.0229908	-0.017709	-0.0272518	-0.0202339	0.293905	0.173489	0.243021	0.216006	0.0550238	-0.0123217	-0.00133854	-0.0134897	18	-0.0126356	-0.00627255	-0.0179385	-0.0192639	0.329238	0.157491	0.274628	0.240019	0.0296314	-0.00134621
19	0.00897301	0.0119493	0.0104755	0.00129943	0.382106	0.267328	0.329361	0.349839	0.204367	0.0300983	0.0498633	0.0883602	19	-0.00632479	0.000499931	-0.0169831	-0.00698572	0.408068	0.286437	0.350907	0.38227	0.178964	0.0314521	0.0501444	0.0768889	19	-0.0244434	-0.0186831	-0.0278861	-0.0237674	0.300933	0.176824	0.246971	0.221789	0.0653689	-0.0106114	-0.00339482	-0.0107096	19	-0.00867153	-0.00619185	-0.0160188	-0.0192346	0.340179	0.164891	0.293522	0.253593	0.0355481	0.000859572
20	0.00891329	0.0110703	0.00814295	0.00214502	0.383555	0.274345	0.332856	0.346326	0.210922	0.0362897	0.0518184	0.0925929	20	-0.0084032	-0.00275991	-0.0165946	-0.00818652	0.410659	0.289498	0.354568	0.381428	0.188262	0.0335365	0.0512944	0.0803727	20	-0.0132259	-0.0194046	-0.0285891	-0.0237748	0.304481	0.183738	0.248363	0.225899	0.0661382	-0.0116089	-0.00256789	-0.014021	20	-0.0103625	-0.0065281	-0.0184851	-0.016047	0.348109	0.173185	0.29861	0.262542	0.0365813	-0.000169958
21	0.00606839	0.00852633	0.00834359	1.91093e-05	0.385335	0.27917	0.341975	0.352488	0.218128	0.037508	0.0574425	0.0982445	21	-0.00746749	-0.00224424	-0.0148672	-0.00989331	0.415846	0.297788	0.350648	0.38622	0.192832	0.0326371	0.0557526	0.0839412	21	-0.0115181	-0.0207726	-0.028556	-0.0238741	0.311083	0.188641	0.257452	0.233103	0.0745903	-0.0103746	-0.00124162	-0.0141461	21	-0.00956656	-0.0121917	-0.0191759	-0.0209623	0.348471	0.17748	0.298161	0.264586	0.039363	0.00267653
22	0.00945432	0.00960959	0.00846303	0.000449068	0.389874	0.287804	0.342038	0.350387	0.222516	0.040071	0.0594705	0.100169	22	-0.00584181	-0.000590718	-0.0153901	-0.00863319	0.420849	0.31055	0.358431	0.393603	0.204311	0.0378713	0.0597024	0.0907018	22	-0.0102298	-0.020548	-0.0287277	-0.0238987	0.318325	0.194848	0.260848	0.241953	0.0780563	-0.0111684	0.000871095	-0.0129769	22	-0.0119998	-0.0116134	-0.0220603	-0.0204011	0.354246	0.181681	0.29804	0.267827	0.0413096	0.002185
23	0.00654254	0.0096693	0.00762222	-0.000775121	0.388918	0.287263	0.348324	0.350562	0.229001	0.0422136	0.0610781	0.101177	23	-0.00888013	-0.0035201	-0.0169262	-0.00916459	0.427779	0.310403	0.355755	0.398176	0.200995	0.037358	0.0636534	0.0920793	23	-0.0102409	-0.0209014	-0.0283744	-0.0262114	0.325423	0.202079	0.264408	0.250639	0.0863587	-0.00876616	0.00323532	-0.0124837	23	-0.00946385	-0.0103577	-0.0181611	-0.0219124	0.357452	0.192712	0.309536	0.279626	0.047713	0.00469647
24	0.0072054	0.00678141	0.00553811	0.00105221	0.390486	0.294062	0.35217	0.355662	0.233307	0.045584	0.064888	0.105317	24	-0.00957011	-0.00650516	-0.0150863	-0.0091077	0.43706	0.314195	0.359574	0.40851	0.211523	0.0417473	0.066256	0.0968946	24	-0.0100483	-0.0208253	-0.0299841	-0.0241698	0.326012	0.207755	0.265994	0.255304	0.0893903	-0.01082	0.00254826	-0.0123217	24	-0.0140967	-0.0120841	-0.0214306	-0.020664	0.360082	0.196978	0.312431	0.279822	0.0521893	0.00652076
25	0.00708596	0.00744785	0.00598001	0.00148216	0.390125	0.296484	0.356676	0.353604	0.232971	0.0480826	0.0679168	0.106059	25	-0.00783427	-0.0052983	-0.0164687	-0.00913796	0.451777	0.320078	0.362615	0.408847	0.215838	0.0446549	0.069839	0.0996678	25	-0.0148957	-0.0229405	-0.0287768	-0.0248667	0.33486	0.21046	0.270995	0.261814	0.0941543	-0.00883855	0.00428922	-0.0107378	25	-0.0158281	-0.0114153	-0.0216996	-0.022624	0.364445	0.201988	0.311681	0.280599	0.0549808	0.00958368
26	0.00693906	0.0044656	0.00611736	-0.000753623	0.398097	0.296988	0.353799	0.352361	0.242578	0.0494955	0.0670103	0.106498	26	-0.00982431	-0.00503805	-0.017333	-0.0101281	0.439766	0.312792	0.363773	0.407194	0.217314	0.0461304	0.0714696	0.0988931	26	-0.0149779	-0.0241821	-0.0280934	-0.0251906	0.338823	0.214523	0.270757	0.264125	0.100407	-0.00827908	0.00763742	-0.0106421	26	-0.0158587	-0.0131577	-0.0204891	-0.0228612	0.371406	0.208375	0.317553	0.290994	0.0593117	0.0104824
27	0.00665839	0.00775957	0.00509263	0.000529089	0.396091	0.299552	0.361176	0.361353	0.246039	0.0521612	0.0715165	0.107978	27	-0.0109367	-0.00740455	-0.0174225	-0.0104223	0.455274	0.315145	0.356992	0.402258	0.221689	0.0430122	0.0757462	0.101124	27	-0.0151399	-0.0243661	-0.0299252	-0.0230227	0.339173	0.219417	0.273493	0.270363	0.104985	-0.00862507	0.00860789	-0.0128836	27	-0.0141187	-0.0098918	-0.0195611	-0.0204365	0.373642	0.215466	0.321101	0.295663	0.0668436	0.0102024
28	0.00533388	0.00626904	0.00519653	0.000434736	0.3991	0.302039	0.36962	0.35123	0.249655	0.0541641	0.0714508	0.110798	28	-0.0110263	-0.00787664	-0.0167205	-0.0112902	0.485763	0.323281	0.359345	0.418164	0.223558	0.0500318	0.0767279	0.101053	28	-0.0151104	-0.0230362	-0.0285093	-0.0266678	0.347427	0.228507	0.280563	0.279506	0.10989	-0.00676019	0.0122947	-0.00858949	28	-0.0162597	-0.0138754	-0.0227976	-0.0238699	0.373916	0.217683	0.322442	0.300253	0.0665331	0.00812375
29	0.00740246	0.00449546	0.00414791	0.00249854	0.422029	0.30259	0.371913	0.352629	0.233145	0.0538966	0.073935	0.110533	29	-0.00866587	-0.00431175	-0.0160389	-0.00827368	0.488417	0.328079	0.366827	0.444756	0.229594	0.0542891	0.082468	0.107218	29	-0.0182648	-0.022646	-0.0288529	-0.0230349	0.348237	0.229007	0.278141	0.279801	0.111712	-0.00507198	0.00970842	-0.00852937	29	-0.0164554	-0.0123495	-0.0215296	-0.0226448	0.378161	0.22114	0.324336	0.304447	0.0708811	0.011655
30	0.00536852	0.0057722	0.00527178	9.55465e-05	0.438408	0.306008	0.378347	0.358792	0.232277	0.0539396	0.0766533	0.111	30	-0.0115856	-0.00660199	-0.0162399	-0.0104998	0.463878	0.326455	0.365642	0.453049	0.225827	0.0535931	0.0826012	0.10884	30	-0.0177826	-0.0238741	-0.0258728	-0.0195223	0.349292	0.232257	0.279969	0.286411	0.11617	-0.00245502	0.0123045	-0.00871463	30	-0.0170288	-0.0156141	-0.0259914	-0.0228905	0.369818	0.217435	0.32547	0.297068	0.0713212	0.0128557
31	0.00634309	0.00459937	0.00432945	0.000769149	0.431298	0.3065	0.370995	0.371892	0.235821	0.0558768	0.0760741	0.113648	31	-0.00922996	-0.00587933	-0.0176864	-0.0106874	0.463679	0.329168	0.365785	0.469388	0.234945	0.0541136	0.0875472	0.109009	31	-0.0182893	-0.0176182	-0.0277033	-0.0215762	0.35581	0.231519	0.283014	0.287471	0.11395	-0.00188942	0.0113794	-0.00949984	31	-0.0167427	-0.01423	-0.024507	-0.020406	0.381486	0.225479	0.324182	0.306318	0.0771756	0.0171413
32	0.00688293	0.00380872	0.00442738	0.00128391	0.423019	0.307786	0.381369	0.380179	0.234466	0.0578367	0.0771311	0.115215	32	-0.0110203	-0.0085424	-0.0163525	-0.0109452	0.453977	0.324575	0.362034	0.484151	0.230857	0.0541112	0.0869057	0.105956	32	-0.0199432	-0.0135302	-0.0257562	-0.0213737	0.356311	0.241362	0.283681	0.295039	0.122853	-0.00189187	0.0136541	-0.00709513	32	-0.019643	-0.0141554	-0.024474	-0.0222437	0.372141	0.225441	0.333691	0.311444	0.0802312	0.0146555
33	-0.00190735	0.00381469	0.00365585	-0.000515951	0.441177	0.305167	0.385477	0.367777	0.236418	0.0604176	0.0776745	0.116513	33	-0.0115614	-0.00802311	-0.0161612	-0.0108556	0.458788	0.326932	0.374571	0.491032	0.234121	0.0555819	0.0888679	0.108149	33	-0.0204364	-0.0152797	-0.0285314	-0.0224325	0.353651	0.234738	0.281307	0.295592	0.125601	-0.00255071	0.0145546	-0.00808646	33	-0.0191612	-0.016706	-0.0138449	-0.0256123	0.378719	0.230162	0.322042	0.311532	0.0819846	0.0173736
34	-0.00283773	0.00346714	0.0026968	0.000549392	0.458502	0.305818	0.375308	0.371277	0.233794	0.0571069	0.0782478	0.11273	34	-0.00955316	-0.00517483	-0.0177457	-0.00945027	0.430971	0.329629	0.385138	0.519186	0.235173	0.0589108	0.0916593	0.111652	34	-0.0183911	-0.0141363	-0.0276113	-0.0199518	0.336385	0.246	0.29045	0.304289	0.131134	0.00159251	0.0198291	-0.00566825	34	-0.013165	-0.0162487	-0.0131662	-0.02202	0.377416	0.233629	0.329454	0.316584	0.0868742	0.0184667
35	-0.00239583	0.0031602	0.00219399	0.00322589	0.467674	0.304926	0.367098	0.384843	0.236928	0.0609348	0.0798303	0.116299	35	-0.00968389	-0.00815142	-0.0155753	-0.0102347	0.412671	0.332317	0.369407	0.53063	0.240698	0.0631535	0.092831	0.10837	35	-0.0204388	-0.0144221	-0.0276309	-0.0237711	0.342838	0.238897	0.286031	0.299173	0.131932	8.58826e-06	0.019034	-0.00492721	35	-0.0119655	-0.0141273	-0.0129633	-0.0250853	0.383991	0.236203	0.332144	0.323538	0.0913922	0.0205429
36	-0.00160757	0.00374184	0.00270755	0.00124688	0.470381	0.304978	0.381094	0.398524	0.235437	0.0625877	0.0804848	0.114516	36	-0.0115529	-0.0086925	-0.0158683	-0.0105688	0.424939	0.33025	0.385343	0.518172	0.236634	0.0624962	0.0970459	0.108262	36	-0.0207811	-0.015092	-0.0271708	-0.0233233	0.342155	0.242248	0.28357	0.30341	0.133735	0.00226607	0.0192708	-0.00608172	36	-0.0139635	-0.0178554	-0.0131479	-0.0251831	0.381864	0.233355	0.327313	0.325646	0.0921221	0.0235386
37	-0.00436767	0.00254631	0.00201842	0.000839615	0.492811	0.305408	0.421008	0.403014	0.236313	0.0627477	0.0783529	0.116291	37	-0.00981463	-0.00791779	-0.0167289	-0.00922391	0.425588	0.342763	0.401446	0.528567	0.238749	0.0663117	0.097627	0.107871	37	-0.0197591	-0.017839	-0.0296197	-0.0244815	0.345107	0.246353	0.286209	0.305767	0.136773	0.0015876	0.0191837	-0.00581303	37	-0.0155114	-0.0178639	-0.0122406	-0.0245155	0.355231	0.234217	0.316013	0.324641	0.0940443	0.0216079
38	-0.00350178	0.00114297	0.000401295	0.00104026	0.496064	0.305805	0.40427	0.414227	0.233142	0.0608452	0.0808431	0.111691	38	-0.0141336	-0.00667341	-0.0155923	-0.0113156	0.441389	0.339523	0.410524	0.544367	0.240509	0.0629223	0.0961453	0.110021	38	-0.0194573	-0.0164048	-0.028383	-0.0211921	0.345008	0.243997	0.278242	0.305439	0.135978	0.00465975	0.0213602	-0.00629765	38	-0.0122859	-0.0152473	-0.012583	-0.0266321	0.360834	0.240065	0.327728	0.331954	0.0968382	0.0264486
39	-0.00114775	0.002907	0.00120747	-7.64372e-05	0.498471	0.304646	0.40183	0.435238	0.229873	0.0608368	0.0817412	0.115061	39	-0.0115069	-0.00803642	-0.0154398	-0.00951806	0.432293	0.331452	0.40525	0.569921	0.235057	0.069816	0.0990674	0.109123	39	-0.0201984	-0.0156343	-0.0306969	-0.0233441	0.345268	0.244259	0.277266	0.306557	0.139581	0.00570383	0.02303	-0.00515541	39	-0.0173186	-0.0181843	-0.0133154	-0.0247258	0.365822	0.243588	0.325316	0.346998	0.0994047	0.0248652
40	-0.00232536	0.00203753	0.00257617	0.00359732	0.517396	0.306478	0.43142	0.458318	0.231128	0.065687	0.0777163	0.114563	40	-0.0115928	-0.00750381	-0.0166333	-0.0120153	0.422828	0.337006	0.399935	0.594816	0.233867	0.067015	0.0993676	0.107532	40	-0.0240189	-0.0185629	-0.0298025	-0.0217541	0.343484	0.246407	0.273222	0.304078	0.137519	0.00487445	0.0235466	-0.00377515	40	-0.0161876	-0.0191197	-0.014702	-0.0240362	0.356567	0.235163	0.323397	0.342201	0.0996675	0.0237758
41	-0.0012636	0.00258573	0.00199095	0.000753623	0.530821	0.302995	0.434117	0.484478	0.234047	0.0642908	0.0774297	0.112247	41	-0.0135926	-0.00852425	-0.0173487	-0.00926507	0.444224	0.341866	0.388038	0.627758	0.23133	0.0692544	0.100846	0.105042	41	-0.0226816	-0.0173139	-0.0300626	-0.0230951	0.347872	0.252208	0.276208	0.306049	0.143518	0.00532595	0.0235147	2.69917e-05	41	-0.0159259	-0.0143829	-0.0160837	-0.0230788	0.357273	0.243259	0.311125	0.34332	0.10668	0.0262567
42	-0.00185838	0.00145828	-0.000145708	0.00219518	0.543134	0.303957	0.421233	0.511164	0.230062	0.0624026	0.0782394	0.113773	42	-0.0112309	-0.00735734	-0.0147619	-0.0101572	0.492243	0.323038	0.387759	0.625876	0.235367	0.0697252	0.103504	0.104674	42	-0.0204806	-0.0182206	-0.0284173	-0.0225344	0.348531	0.250176	0.276628	0.304719	0.145499	0.00493948	0.0243919	-0.00241085	42	-0.0178982	-0.0162585	-0.0145002	-0.0224614	0.357111	0.239433	0.322497	0.345275	0.10746	0.0264291
43	-0.00272785	0.000800202	-0.000401295	0.0030133	0.560317	0.295405	0.415198	0.543373	0.227639	0.0644962	0.0777438	0.113672	43	-0.0127634	-0.00653905	-0.0177639	-0.00950111	0.50502	0.331623	0.38586	0.584494	0.226556	0.0710132	0.106086	0.104206	43	-0.0204879	-0.017271	-0.028805	-0.024041	0.349324	0.252906	0.274959	0.308761	0.14764	0.00678227	0.0278603	5.39834e-05	43	-0.0170386	-0.0184839	-0.0141701	-0.0230813	0.361606	0.240679	0.321047	0.366541	0.109371	0.0270612
44	-0.00103907	0.0036021	0.00159921	0.00243285	0.583803	0.296298	0.404193	0.54659	0.231046	0.0656034	0.0793322	0.111986	44	-0.011496	-0.00710193	-0.0156225	-0.0101124	0.527052	0.327393	0.392394	0.593329	0.227598	0.0734487	0.107134	0.105406	44	-0.0191334	-0.0203664	-0.0294565	-0.0245698	0.349124	0.251351	0.274687	0.30145	0.145105	0.00345493	0.025928	-0.00275192	44	-0.0204671	-0.0190671	-0.0174103	-0.0234713	0.363298	0.239544	0.342602	0.374874	0.110612	0.0287058
45	-0.00251287	0.00248899	0.00274457	0.000611497	0.593972	0.298665	0.36432	0.563507	0.228673	0.0656774	0.0783385	0.113664	45	-0.0129607	-0.00568202	-0.0174504	-0.0119729	0.569867	0.329953	0.408068	0.618858	0.222341	0.0697228	0.101884	0.104197	45	-0.0177863	-0.0199162	-0.0286234	-0.025782	0.34838	0.246151	0.273986	0.307235	0.145895	0.00698348	0.0240876	-0.00212989	45	-0.01916	-0.0164456	-0.0163918	-0.0216959	0.387628	0.238691	0.328673	0.360158	0.112306	0.030409
46	-0.0013699	0.00136751	0.00277324	0.00133048	0.595616	0.300264	0.379226	0.570254	0.231222	0.0662734	0.0776673	0.110427	46	-0.0127706	-0.0041786	-0.0171502	-0.0115928	0.574652	0.346496	0.436673	0.649562	0.22371	0.0738942	0.10822	0.10187	46	-0.0185249	-0.0200119	-0.0282971	-0.0241441	0.347319	0.247326	0.27878	0.304148	0.148053	0.00758589	0.0284848	-0.000219614	46	-0.016953	-0.0193557	-0.0164725	-0.022937	0.419461	0.240658	0.333448	0.361277	0.116569	0.0302366
47	-0.00282937	0.00309929	-0.000504008	0.00187271	0.593419	0.303617	0.398216	0.588232	0.220558	0.0652857	0.0732698	0.106858	47	-0.0103654	-0.00872035	-0.0157642	-0.00821436	0.51487	0.341296	0.438466	0.646612	0.221063	0.0734136	0.105306	0.102489	47	-0.0199456	-0.0218964	-0.0266899	-0.0263304	0.34728	0.245601	0.270216	0.297012	0.147844	0.00456896	0.0277879	-0.000856372	47	-0.0164933	-0.0201321	-0.0189155	-0.0216079	0.420027	0.23883	0.326753	0.375303	0.115799	0.0282986
48	-0.000647327	0.00240538	0.00337637	0.00238747	0.607275	0.308062	0.414827	0.599785	0.22433	0.0640412	0.0769113	0.110118	48	-0.0124341	-0.0100821	-0.0181573	-0.0102589	0.499098	0.346947	0.464007	0.628855	0.218747	0.071455	0.103938	0.0971815	48	-0.0191923	-0.020867	-0.0293461	-0.0265782	0.349791	0.243443	0.26386	0.296905	0.145187	0.00914282	0.0282713	-0.000125143	48	-0.0174433	-0.0199413	-0.0175607	-0.0237012	0.426897	0.236569	0.358433	0.402398	0.11854	0.0315841
49	-0.00167087	0.0028019	0.00401534	0.000776315	0.621364	0.309184	0.410266	0.6172	0.216433	0.0631132	0.0723036	0.109222	49	-0.0130043	-0.00861988	-0.0158186	-0.00866103	0.578483	0.360179	0.481742	0.607052	0.215718	0.0735141	0.108011	0.0998385	49	-0.0182832	-0.0226325	-0.0294307	-0.0239821	0.340706	0.247384	0.26339	0.304505	0.146333	0.00640194	0.0301252	0.00276174	49	-0.0196552	-0.017793	-0.0171486	-0.0221019	0.455217	0.238703	0.335939	0.419284	0.122636	0.0308908
50	0.00037502	0.00313034	0.00146306	0.00175925	0.628716	0.314742	0.409347	0.615365	0.219678	0.0662686	0.0749669	0.111215	50	-0.0116279	-0.00683804	-0.0166151	-0.00966937	0.655321	0.36087	0.502087	0.615871	0.215694	0.076182	0.105421	0.0977989	50	-0.0212142	-0.0224411	-0.0279756	-0.0240116	0.347719	0.244069	0.267975	0.298069	0.148112	0.00547931	0.0313128	0.000874776	50	-0.0211323	-0.0192065	-0.0184936	-0.022569	0.480429	0.233997	0.364817	0.41879	0.1224	0.032193
51	-0.00263828	0.00219996	0.00233372	0.00219757	0.648157	0.318202	0.407508	0.62825	0.213282	0.0617863	0.0745979	0.105937	51	-0.0143455	-0.0076648	-0.0192722	-0.01191	0.638253	0.363259	0.529262	0.582411	0.208855	0.0717952	0.101671	0.0925938	51	-0.0187494	-0.0242667	-0.02668	-0.024614	0.345209	0.244294	0.269824	0.30672	0.145339	0.006332	0.0308993	-0.000530018	51	-0.0158636	-0.0196638	-0.0174091	-0.022871	0.467816	0.23538	0.350908	0.401493	0.122042	0.0310705
52	-0.00165654	0.00122419	0.00156218	0.00177239	0.683096	0.309942	0.419683	0.641955	0.209646	0.0630869	0.0736603	0.102284	52	-0.0152086	-0.0115601	-0.0170703	-0.011634	0.662159	0.359087	0.573972	0.57212	0.206685	0.0719755	0.101545	0.0955231	52	-0.0204143	-0.0233245	-0.0244066	-0.0219087	0.345233	0.24185	0.28254	0.304405	0.145078	0.00774784	0.0303521	0.000311631	52	-0.0183445	-0.0202568	-0.0174922	-0.0211971	0.457995	0.2297	0.364929	0.396598	0.121249	0.0293086
53	-0.00105937	0.00090172	0.00233372	0.00104146	0.701346	0.304862	0.425884	0.638373	0.209091	0.0648617	0.0733128	0.102185	53	-0.0140017	-0.00923964	-0.0149822	-0.00969358	0.572224	0.350223	0.615195	0.541359	0.203138	0.0715531	0.10424	0.0919449	53	-0.0211762	-0.0215099	-0.0263586	-0.0242066	0.335238	0.236264	0.286192	0.299036	0.145942	0.00480452	0.0305803	0.00308932	53	-0.0186587	-0.02258	-0.0200428	-0.0230519	0.453606	0.231656	0.337197	0.356464	0.122277	0.0291154
54	-0.00271352	0.000979351	0.00188585	0.00362599	0.702963	0.309534	0.435122	0.627679	0.208335	0.0639457	0.0691995	0.0984427	54	-0.0121303	-0.0100894	-0.0181149	-0.0106353	0.540515	0.349811	0.622801	0.51377	0.200535	0.0740503	0.102902	0.0885289	54	-0.0185445	-0.0215786	-0.0283253	-0.0253366	0.326334	0.232124	0.282971	0.298626	0.140102	0.00698716	0.0324599	0.0010539	54	-0.0183873	-0.0214783	-0.0218463	-0.0233649	0.453833	0.232686	0.348816	0.385874	0.119606	0.0305203
55	-0.00238986	0.00031172	0.00180463	0.00119911	0.712408	0.307774	0.410772	0.615615	0.203316	0.0639242	0.0681628	0.102586	55	-0.0130987	-0.00992115	-0.0178099	-0.0111341	0.552786	0.355278	0.629918	0.485578	0.200154	0.0739632	0.101883	0.0896971	55	-0.0163668	-0.0223503	-0.0257746	-0.0227098	0.346525	0.232708	0.288406	0.307492	0.142204	0.00813799	0.0318858	0.00234091	55	-0.0167451	-0.0180131	-0.0195097	-0.019764	0.510253	0.234952	0.346322	0.391575	0.122841	0.028361
56	-0.00135676	0.000908886	0.00113103	0.000341579	0.724626	0.312567	0.427542	0.630135	0.200387	0.0622617	0.0658769	0.102678	56	-0.0154688	-0.0108907	-0.0181634	-0.0100531	0.580214	0.364084	0.615848	0.472009	0.195254	0.0720579	0.0950474	0.0851202	56	-0.0167508	-0.023868	-0.0283462	-0.0237895	0.342548	0.233898	0.287963	0.305773	0.143641	0.0056658	0.031384	0.00222436	56	-0.0158513	-0.0190157	-0.017579	-0.022185	0.487257	0.233936	0.39007	0.35259	0.125973	0.0301229
57	0.000948299	0.00201603	0.00153233	0.00317692	0.755584	0.313862	0.435721	0.629516	0.195974	0.0588638	0.0646372	0.100012	57	-0.01394	-0.00835962	-0.0157412	-0.0103121	0.664215	0.389928	0.630273	0.483194	0.195857	0.070069	0.0966707	0.0878281	57	-0.0179924	-0.0227847	-0.0248225	-0.0236877	0.341983	0.234801	0.285102	0.322316	0.136935	0.0078006	0.0345641	0.00323655	57	-0.0211946	-0.0194046	-0.0200599	-0.0231106	0.499349	0.235234	0.386718	0.404554	0.128165	0.0302586
58	-0.000334413	0.000591194	0.00354477	0.000858724	0.75664	0.311596	0.446647	0.634604	0.198641	0.061145	0.065982	0.0985239	58	-0.0128408	-0.00959069	-0.0182469	-0.0109428	0.714946	0.401147	0.641217	0.477194	0.190454	0.0720022	0.0949106	0.086436	58	-0.0179507	-0.0253219	-0.0269659	-0.0246839	0.350521	0.228564	0.295484	0.320692	0.138235	0.00717611	0.0352953	0.00487813	58	-0.0190915	-0.0199316	-0.0180425	-0.0203791	0.467349	0.242151	0.396879	0.42108	0.123692	0.0290909
59	-0.000527894	0.000752428	0.00251287	0.00161235	0.760112	0.316162	0.442892	0.619982	0.189698	0.0604714	0.0627884	0.0961842	59	-0.0146723	-0.00884261	-0.0158949	-0.0100664	0.737413	0.39242	0.655727	0.448237	0.186969	0.0679168	0.0942279	0.0838795	59	-0.0191948	-0.0231306	-0.0270493	-0.0239711	0.358205	0.223676	0.297857	0.316826	0.136622	0.00734174	0.0316833	0.00382791	59	-0.0191246	-0.020461	-0.0183921	-0.0197714	0.508711	0.233455	0.400591	0.363237	0.124893	0.0293025
60	-0.00314587	0.00140334	0.00342773	0.00101279	0.778312	0.332111	0.427097	0.612582	0.179111	0.0597404	0.0641869	0.0978324	60	-0.0149858	-0.00843104	-0.0200941	-0.0102468	0.758179	0.389323	0.622801	0.424191	0.17896	0.0684337	0.0904706	0.0795266	60	-0.0181801	-0.0219258	-0.0270947	-0.0238471	0.385912	0.232128	0.303256	0.329325	0.13548	0.00455055	0.0326158	0.00164527	60	-0.0200245	-0.0210075	-0.0189045	-0.0200807	0.458763	0.232422	0.395697	0.385912	0.127203	0.0285126
61	-0.00374662	0.00199692	0.00246629	0.00083842	0.779779	0.351054	0.423863	0.609468	0.174358	0.0586607	0.0625244	0.0977142	61	-0.0153804	-0.0093038	-0.019116	-0.0122078	0.720672	0.404726	0.568119	0.38227	0.177911	0.0681916	0.0892359	0.0823107	61	-0.0202548	-0.0246066	-0.0264077	-0.0212596	0.401358	0.234813	0.314754	0.333548	0.135293	0.00704237	0.0337838	0.00470269	61	-0.0213267	-0.0202042	-0.0183347	-0.0205111	0.471648	0.239056	0.389337	0.393871	0.122959	0.0306328
62	-0.000371437	0.00219518	0.00279235	0.00095427	0.764331	0.344592	0.435443	0.656201	0.170678	0.0580827	0.059879	0.0939938	62	-0.0133952	-0.0088305	-0.0176574	-0.0102492	0.672273	0.414816	0.560855	0.369178	0.18187	0.069741	0.0896365	0.0831895	62	-0.0178673	-0.0214461	-0.0254617	-0.022262	0.42288	0.236524	0.329219	0.336102	0.129799	0.00701293	0.0329397	0.00365369	62	-0.0199536	-0.0190463	-0.0160739	-0.021389	0.493058	0.241842	0.395101	0.408492	0.125052	0.0291582
63	-0.00301688	0.00283176	0.0030336	0.000353522	0.774445	0.335817	0.450388	0.68449	0.170762	0.0588232	0.0595732	0.0949242	63	-0.0134098	-0.00729802	-0.0196474	-0.0106838	0.579709	0.418519	0.5296	0.356626	0.174185	0.0679301	0.0845561	0.0797118	63	-0.0188083	-0.023614	-0.0259231	-0.0210866	0.434986	0.239857	0.336711	0.344365	0.133527	0.00743866	0.033239	0.00388189	63	-0.0193728	-0.0215199	-0.0175595	-0.0215749	0.479471	0.242817	0.393888	0.424877	0.122107	0.0253959
64	-0.00386605	0.0026323	0.00127435	0.000632995	0.790402	0.344488	0.440939	0.697034	0.165079	0.0576169	0.0592149	0.0939592	64	-0.0166478	-0.00977226	-0.0187916	-0.0132088	0.523906	0.39644	0.495657	0.340355	0.174482	0.0675778	0.0787155	0.0769071	64	-0.0196426	-0.0194438	-0.024982	-0.0225466	0.450916	0.235567	0.329608	0.344243	0.130678	0.00641298	0.03272	0.00484746	64	-0.0223697	-0.0206811	-0.0204964	-0.0220505	0.516828	0.23387	0.396367	0.420202	0.122528	0.0272055
65	-0.00234805	0.00131376	0.00297627	0.000827671	0.793521	0.336031	0.450282	0.679894	0.159007	0.0560834	0.0569158	0.0937132	65	-0.011565	-0.0101971	-0.0198544	-0.0132415	0.580394	0.410204	0.51579	0.337834	0.168213	0.0666918	0.0796355	0.076303	65	-0.019699	-0.0230619	-0.025647	-0.0208572	0.467138	0.237237	0.331263	0.342728	0.126766	0.00808523	0.0372718	0.00489531	65	-0.0192322	-0.0204243	-0.0186037	-0.0224369	0.529495	0.234186	0.390411	0.428457	0.121893	0.0258104
66	-0.00033083	0.00273621	0.00365704	0.00170312	0.758026	0.339278	0.470874	0.674535	0.16052	0.0543659	0.056419	0.0929775	66	-0.0127101	-0.0092808	-0.0177118	-0.0139969	0.630233	0.415979	0.519829	0.35207	0.162867	0.0652646	0.077942	0.0739377	66	-0.0222914	-0.0220277	-0.0269463	-0.0219909	0.473314	0.234566	0.328257	0.339147	0.125987	0.00547318	0.0342389	0.0029789	66	-0.018276	-0.0201431	-0.0170313	-0.0225359	0.541617	0.233429	0.403571	0.471465	0.123166	0.0275136
67	-0.00234208	0.00336921	0.00359732	0.00198856	0.752494	0.340854	0.461986	0.685532	0.147505	0.0553035	0.0533376	0.0906581	67	-0.0124862	-0.00746507	-0.0193593	-0.011145	0.630076	0.42672	0.532525	0.379206	0.169675	0.0663698	0.0809235	0.0768332	67	-0.0198597	-0.021251	-0.0267991	-0.023841	0.477603	0.23303	0.320873	0.337532	0.123851	0.00864347	0.0346328	0.00198021	67	-0.0197359	-0.0175827	-0.0177258	-0.0213475	0.574108	0.239482	0.395803	0.431423	0.118011	0.0255023
68	-0.00316737	0.00127913	0.00363077	-0.000556558	0.727832	0.344849	0.463459	0.679155	0.151374	0.0528874	0.0560022	0.0903487	68	-0.0156213	-0.0106039	-0.017707	-0.0123022	0.649121	0.437852	0.539231	0.395939	0.161479	0.0637539	0.0765197	0.072306	68	-0.0192291	-0.0248692	-0.0263242	-0.0232447	0.476558	0.230997	0.322845	0.343881	0.123054	0.00430763	0.0339617	0.00415795	68	-0.0194779	-0.0142924	-0.0178077	-0.020955	0.648998	0.242227	0.391609	0.44529	0.119192	0.0251966
69	-0.00251048	0.00251048	0.000975768	0.000616275	0.736639	0.340653	0.434831	0.661178	0.149529	0.0540721	0.052363	0.0868625	69	-0.0119899	-0.00912949	-0.017753	-0.0130696	0.617514	0.443117	0.519075	0.41905	0.157838	0.063254	0.0744631	0.0721825	69	-0.0222056	-0.0244005	-0.0263844	-0.0236484	0.479743	0.23379	0.324428	0.340928	0.12006	0.00435916	0.0313803	0.00368068	69	-0.0220359	-0.0161644	-0.0196662	-0.0205735	0.663566	0.235908	0.403452	0.443597	0.123788	0.0242612
70	-0.00341937	0.00130421	0.00267172	0.000146903	0.732257	0.339563	0.425573	0.662573	0.138213	0.05098	0.0497594	0.0857398	70	-0.0127464	-0.00965484	-0.018351	-0.0114318	0.616745	0.439172	0.522444	0.429799	0.153231	0.0631232	0.075814	0.0731594	70	-0.0220473	-0.0226742	-0.0248164	-0.0228742	0.483885	0.233747	0.33256	0.346545	0.117966	0.00598111	0.0355223	0.00535662	70	-0.0194975	-0.0160568	-0.0185719	-0.0239995	0.648795	0.223871	0.404473	0.43751	0.117151	0.0238944
[truncated: 28 more columns]
