# Supplementary figures and images for: Sec17/Sec18 can support membrane fusion without help from completion of SNARE zippering
Source: eLife journal article supplement (doi:10.7554/elife.67578), 2021-05-04

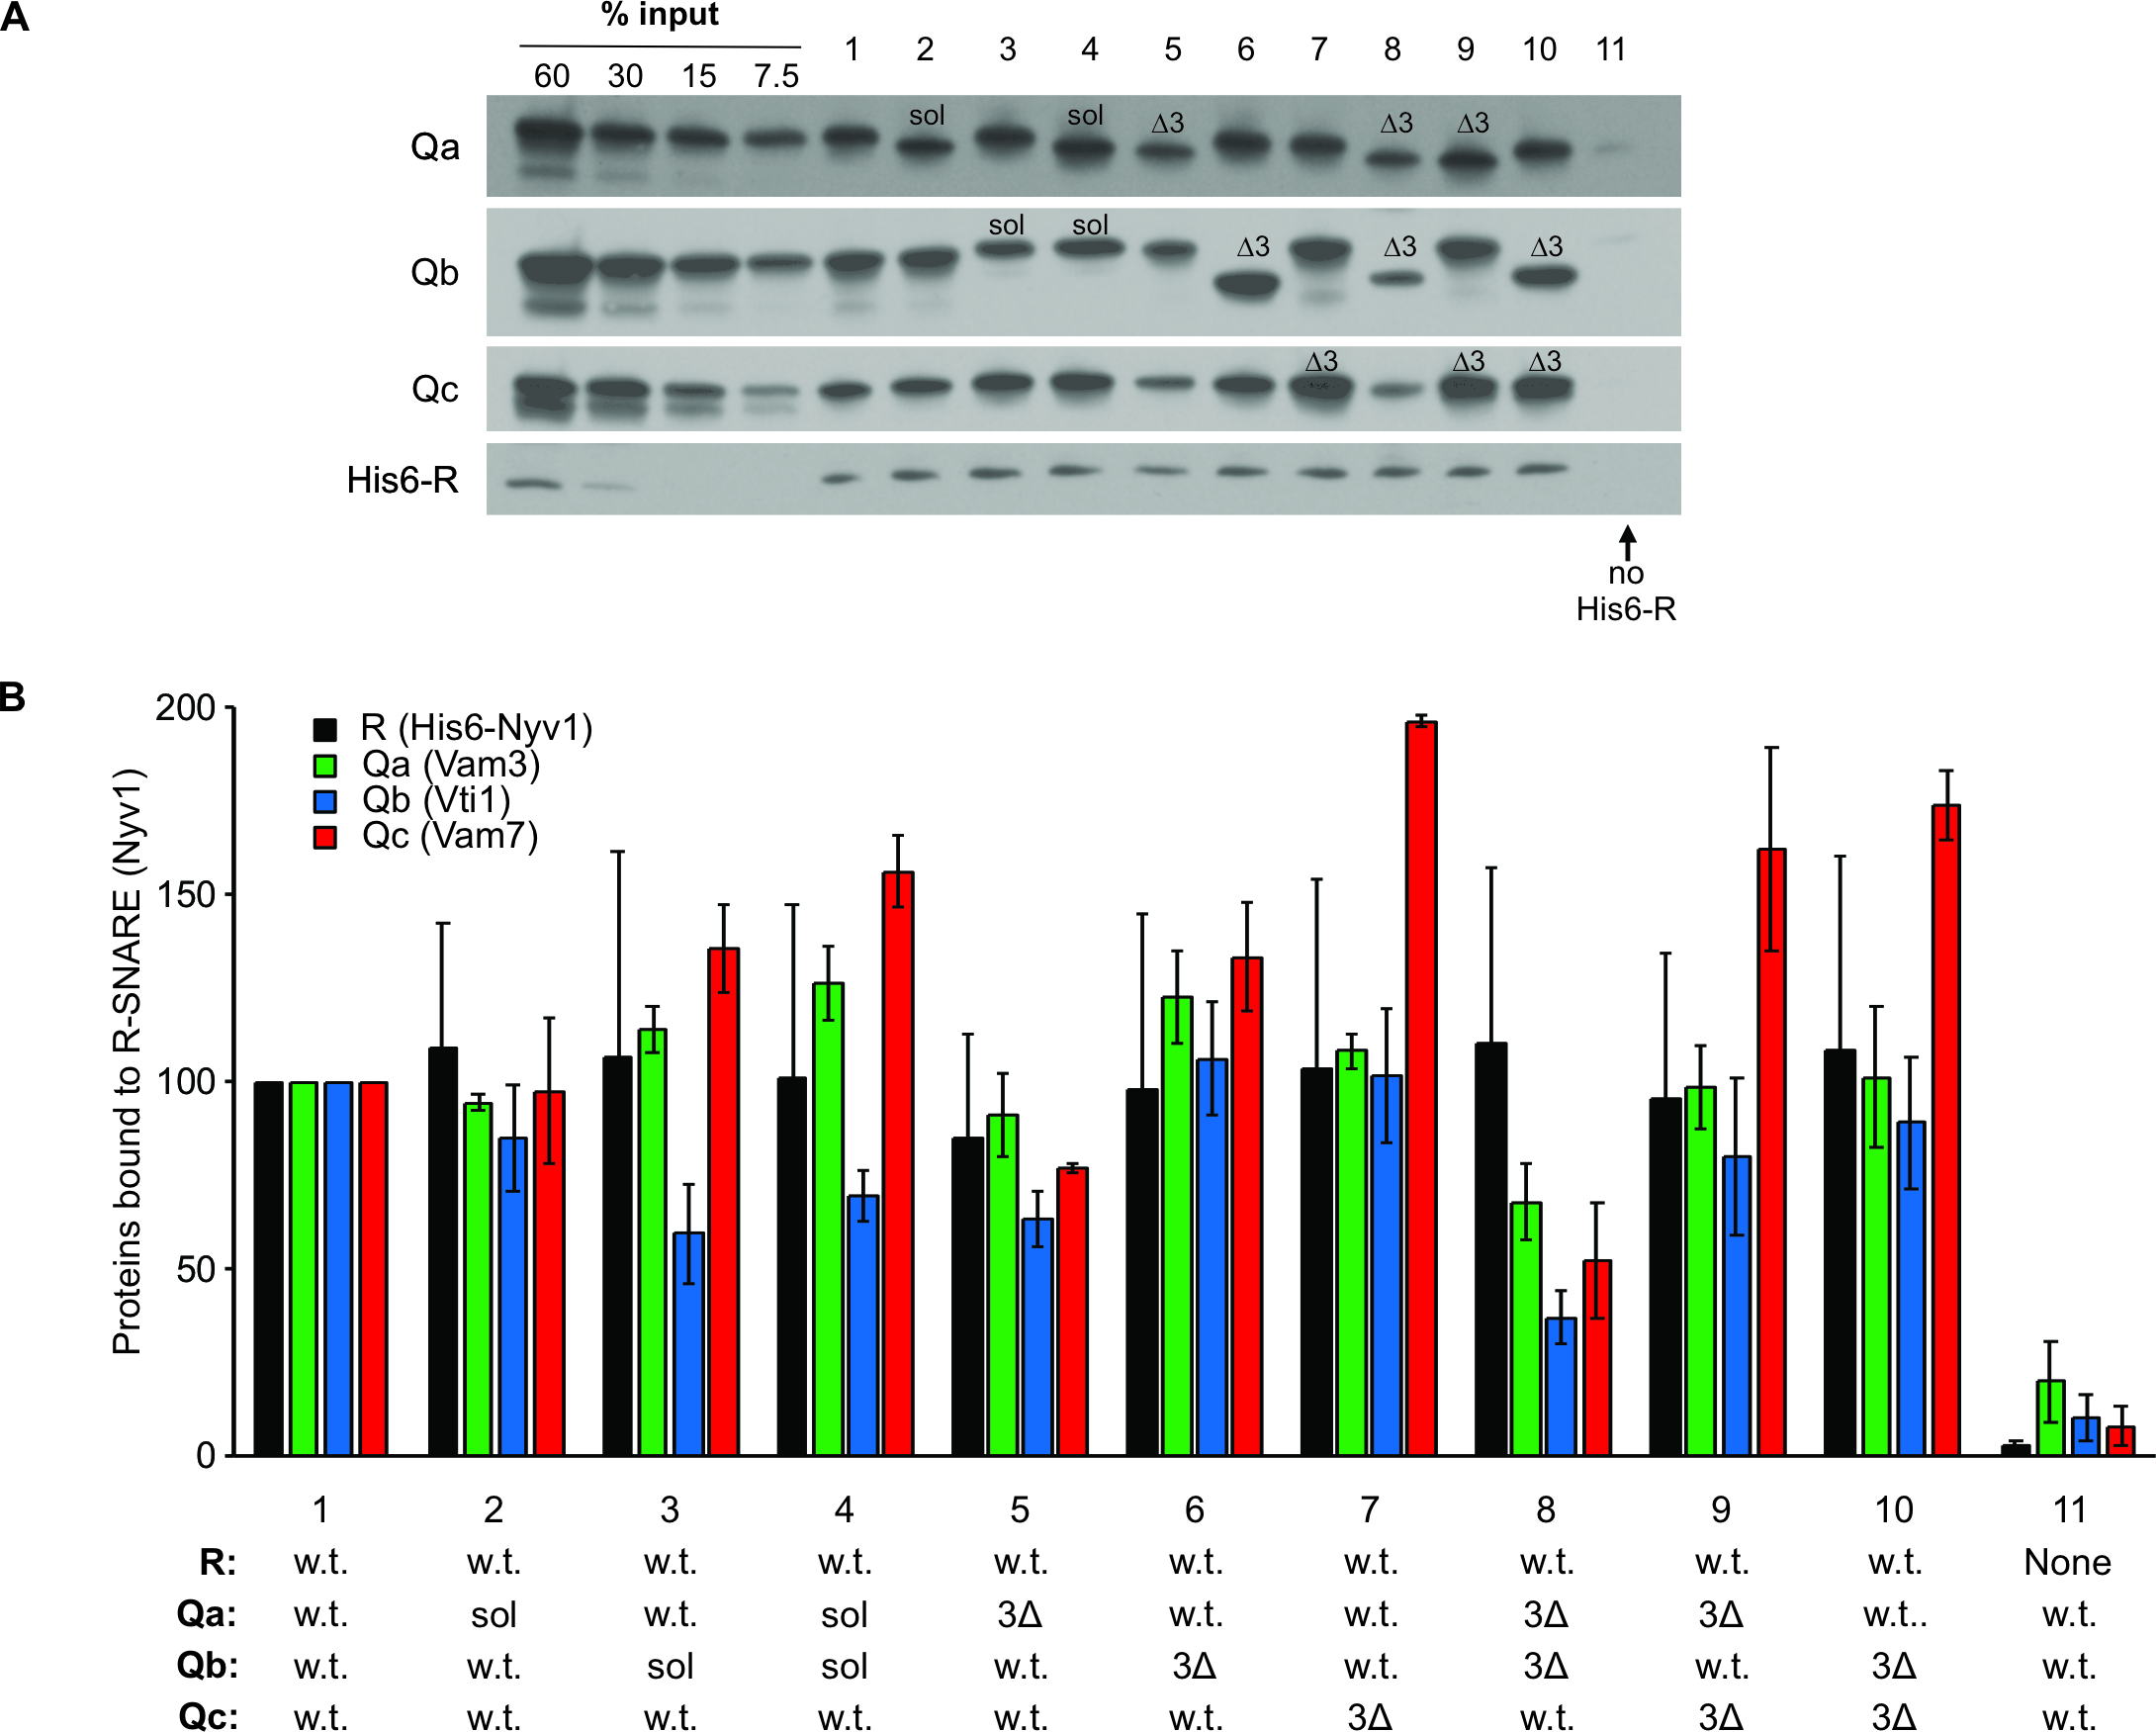

Supplement: supp [file elife-67578-supp-v1.zip › elife_poa_e67578_Figure_1_figure_supplement_1.tif]

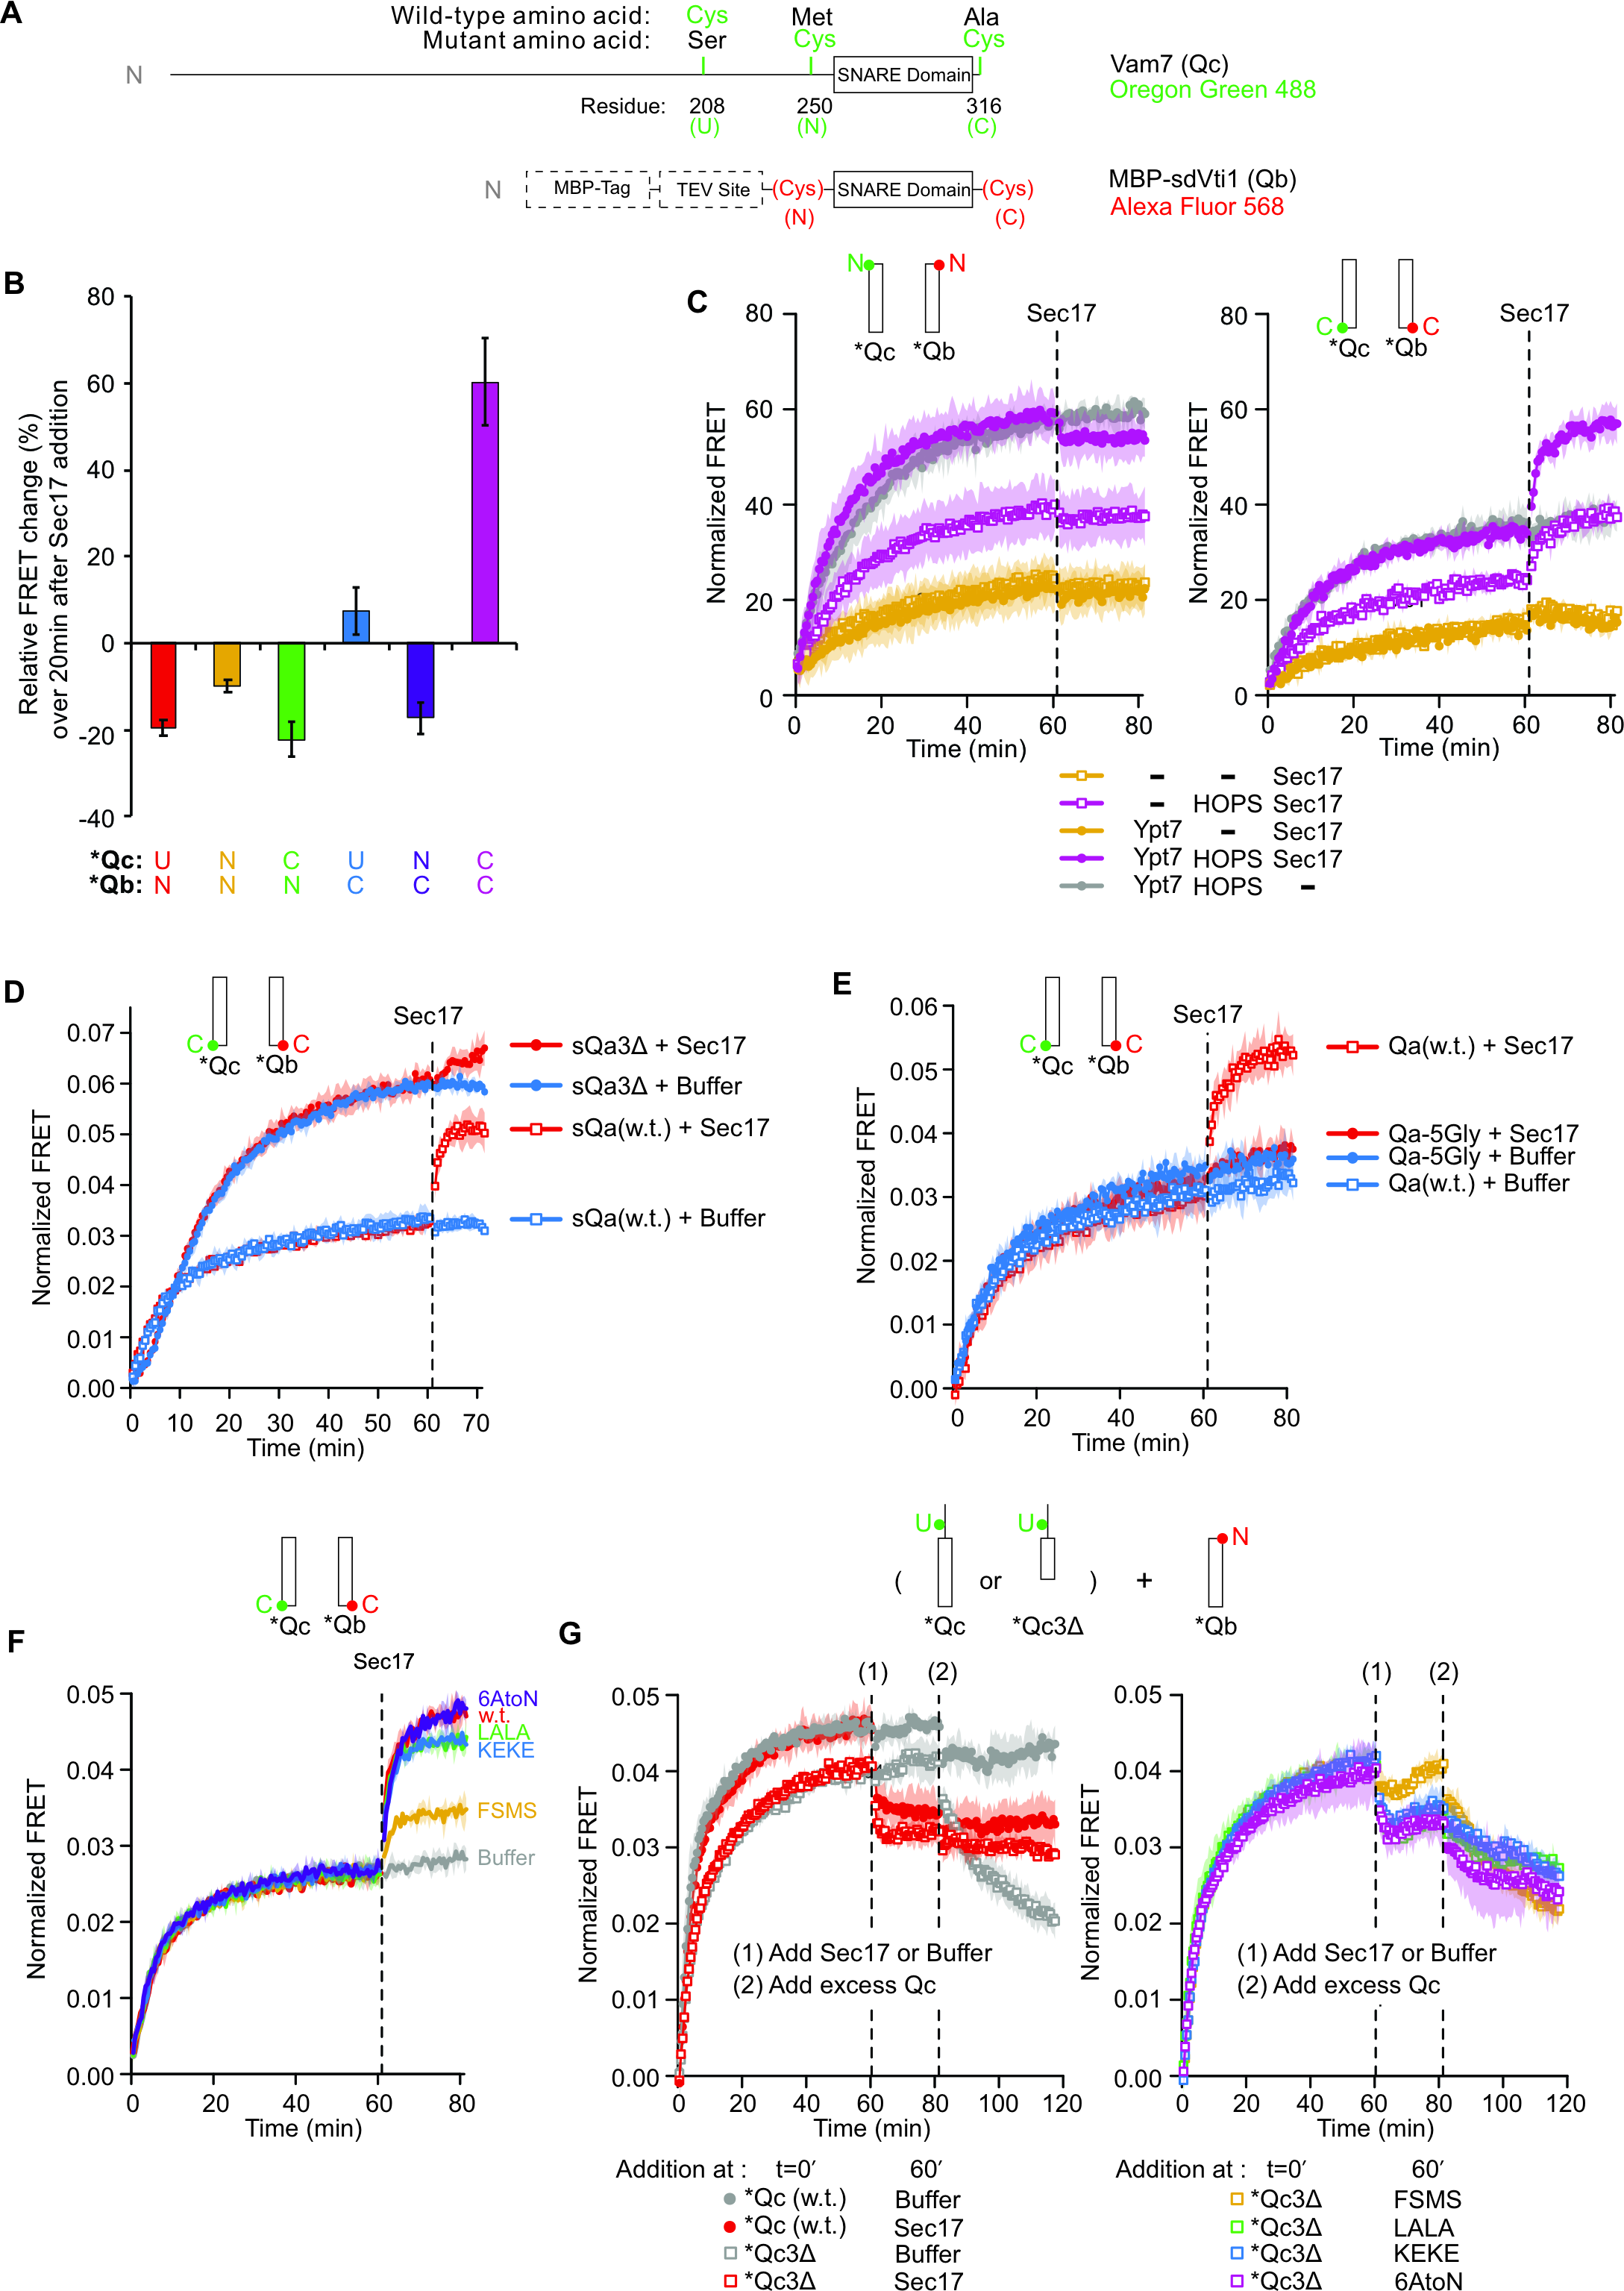

Supplement: supp [file elife-67578-supp-v1.zip › elife_poa_e67578_Figure_2_figure_supplement_1.tif]

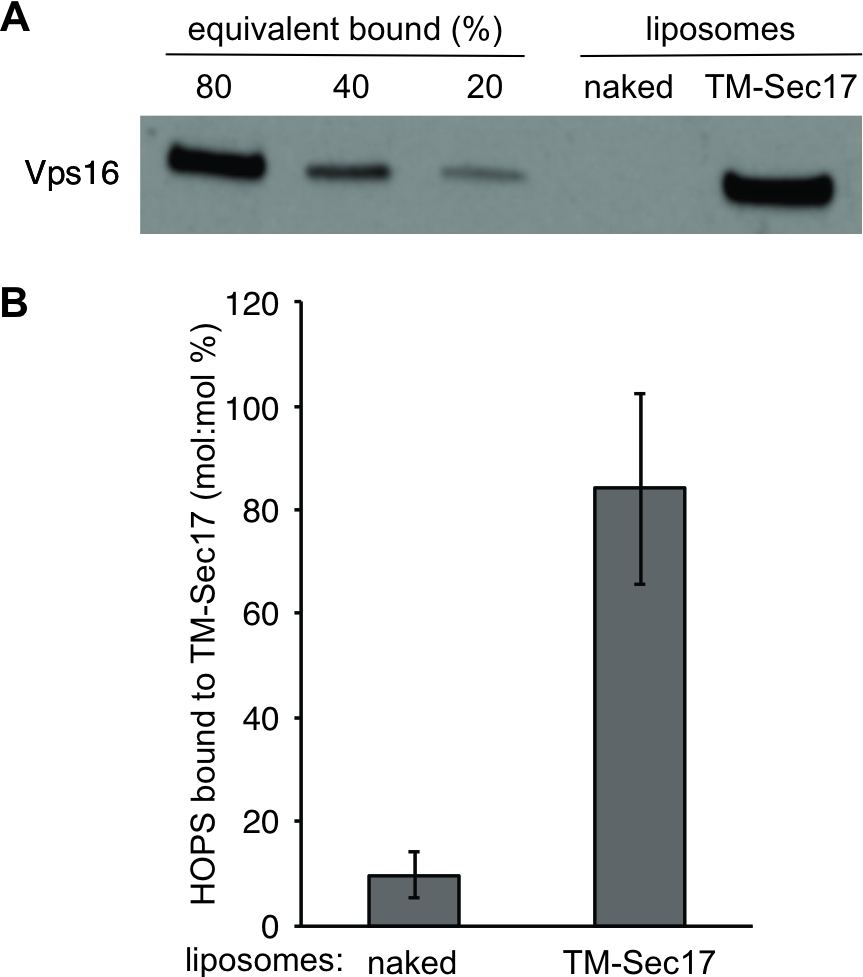

Supplement: supp [file elife-67578-supp-v1.zip › elife_poa_e67578_Figure_2_figure_supplement_2.tif]

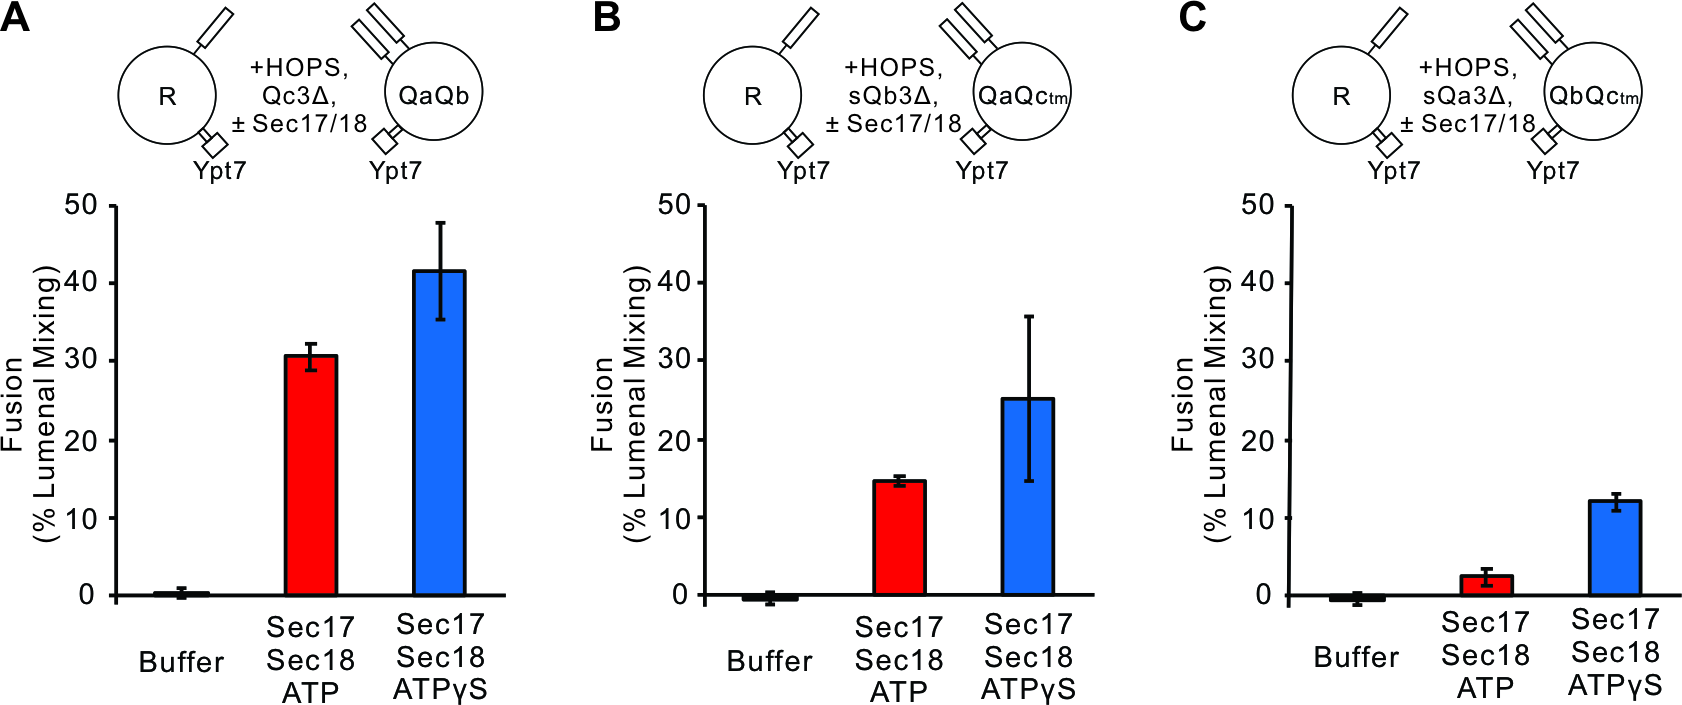

Supplement: supp [file elife-67578-supp-v1.zip › elife_poa_e67578_Figure_3_figure_supplement_1.tif]

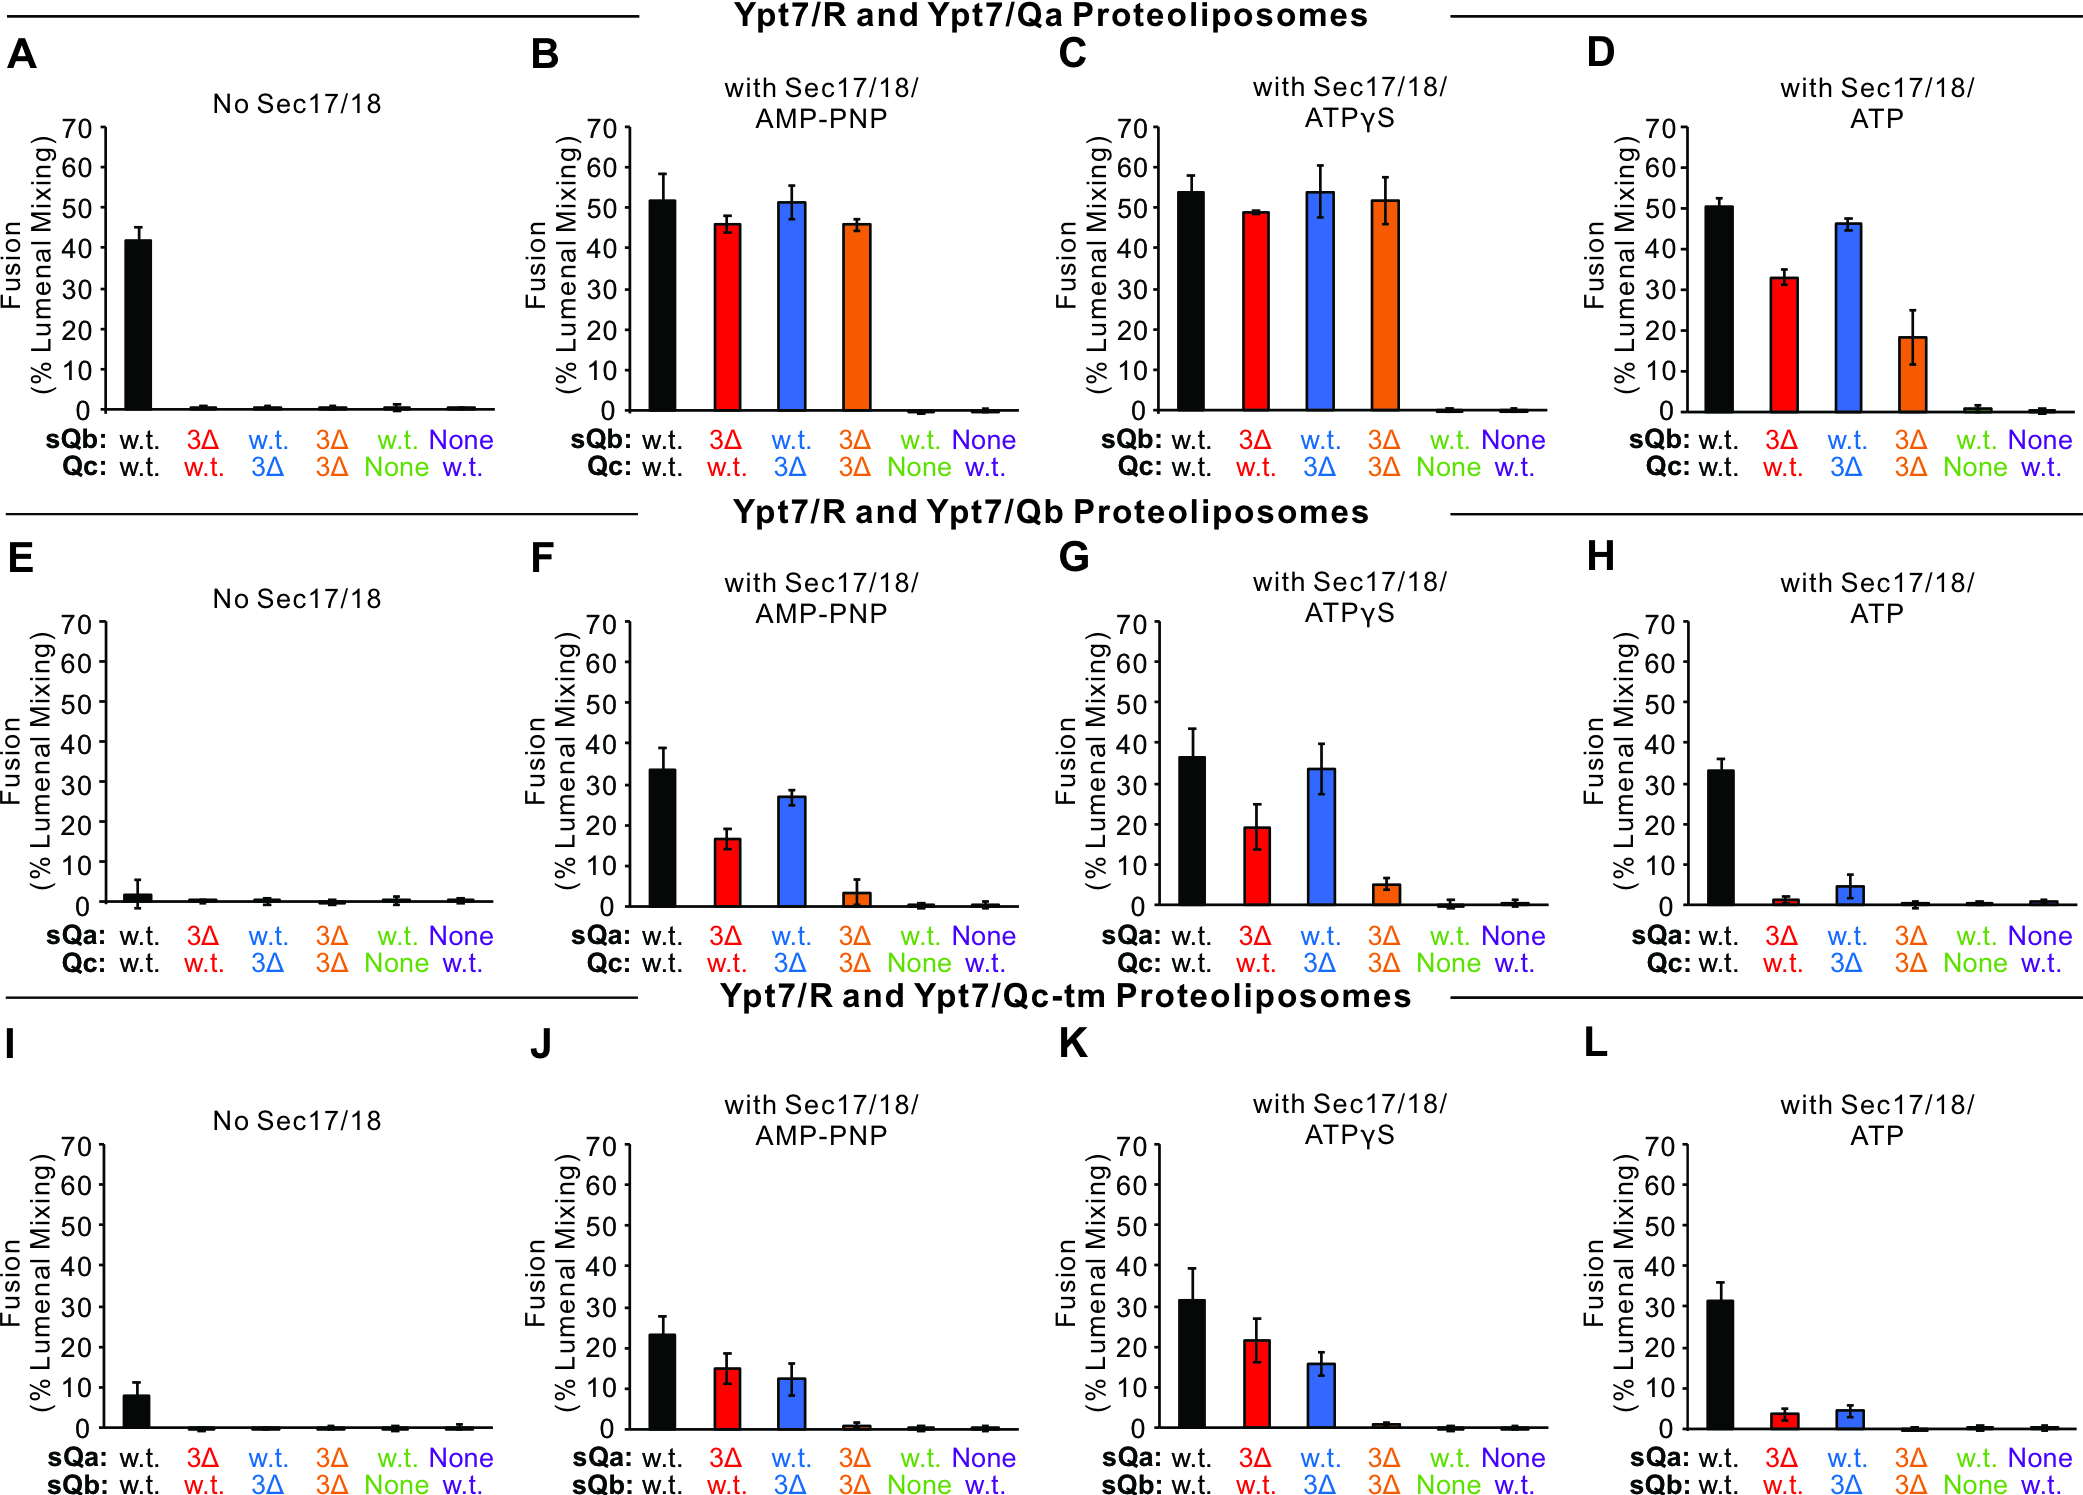

Supplement: supp [file elife-67578-supp-v1.zip › elife_poa_e67578_Figure_4_figure_supplement_1.tif]

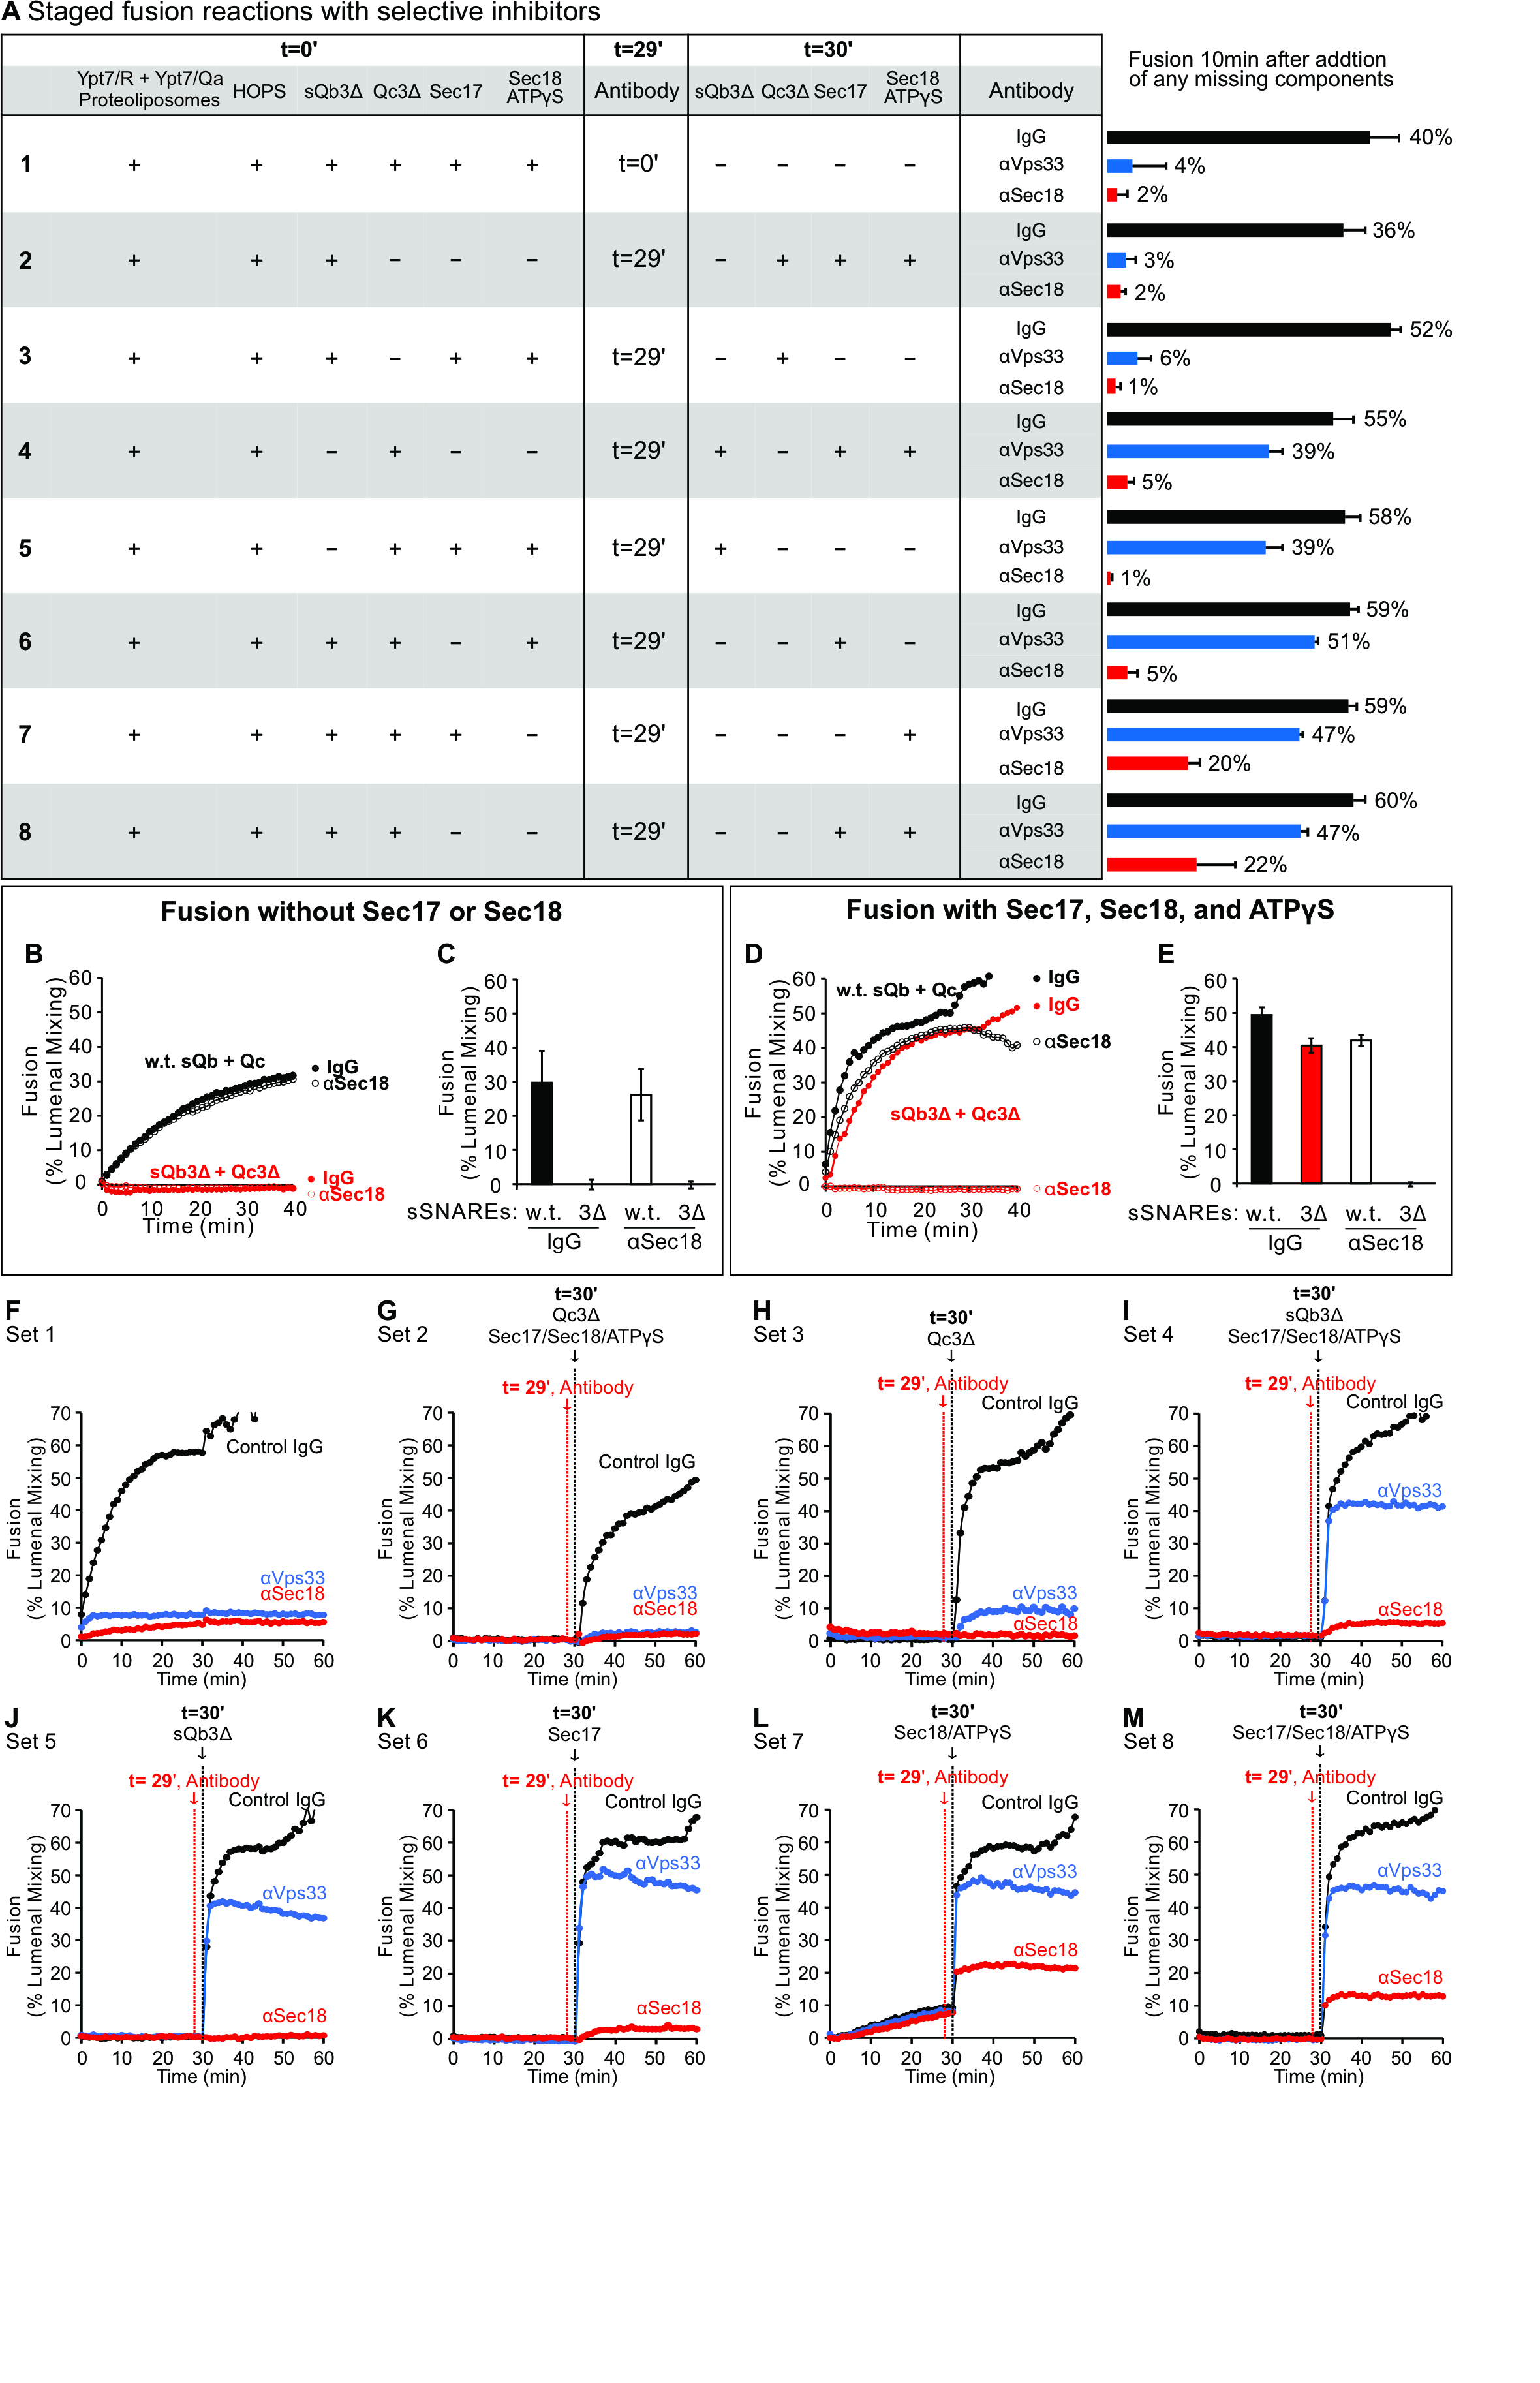

Supplement: supp [file elife-67578-supp-v1.zip › elife_poa_e67578_Figure_4_figure_supplement_2.tif]

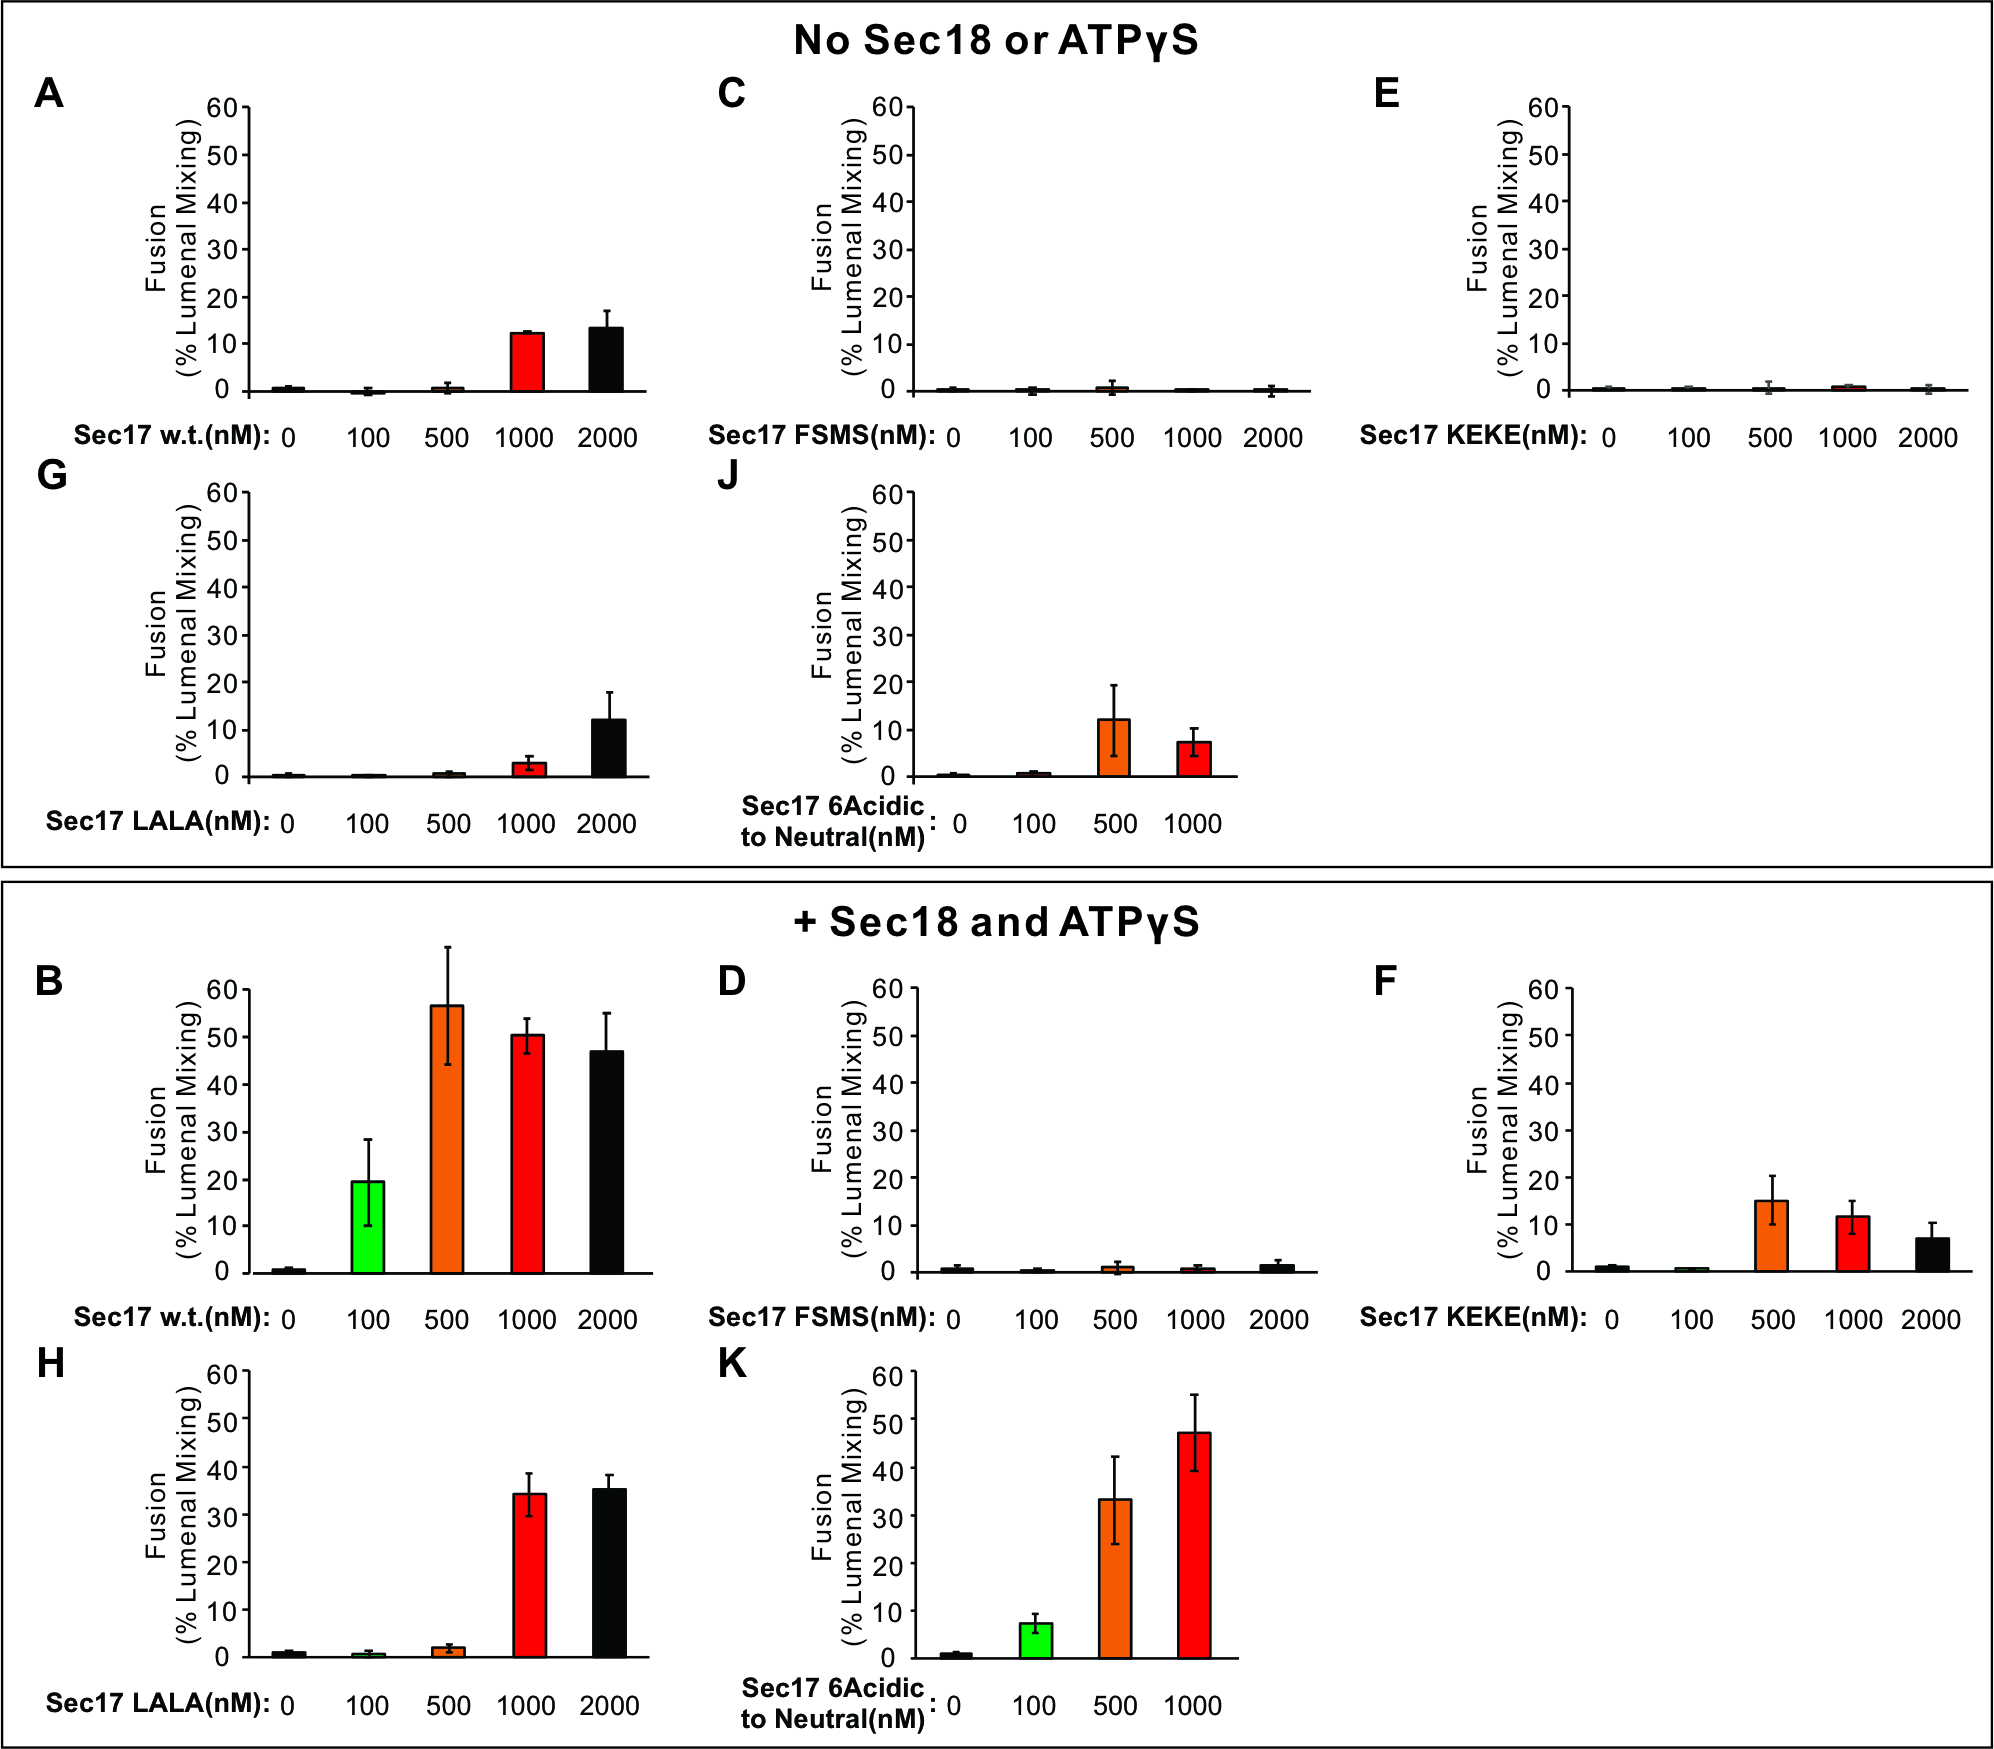

Supplement: supp [file elife-67578-supp-v1.zip › elife_poa_e67578_Figure_5_figure_supplement_1.tif]

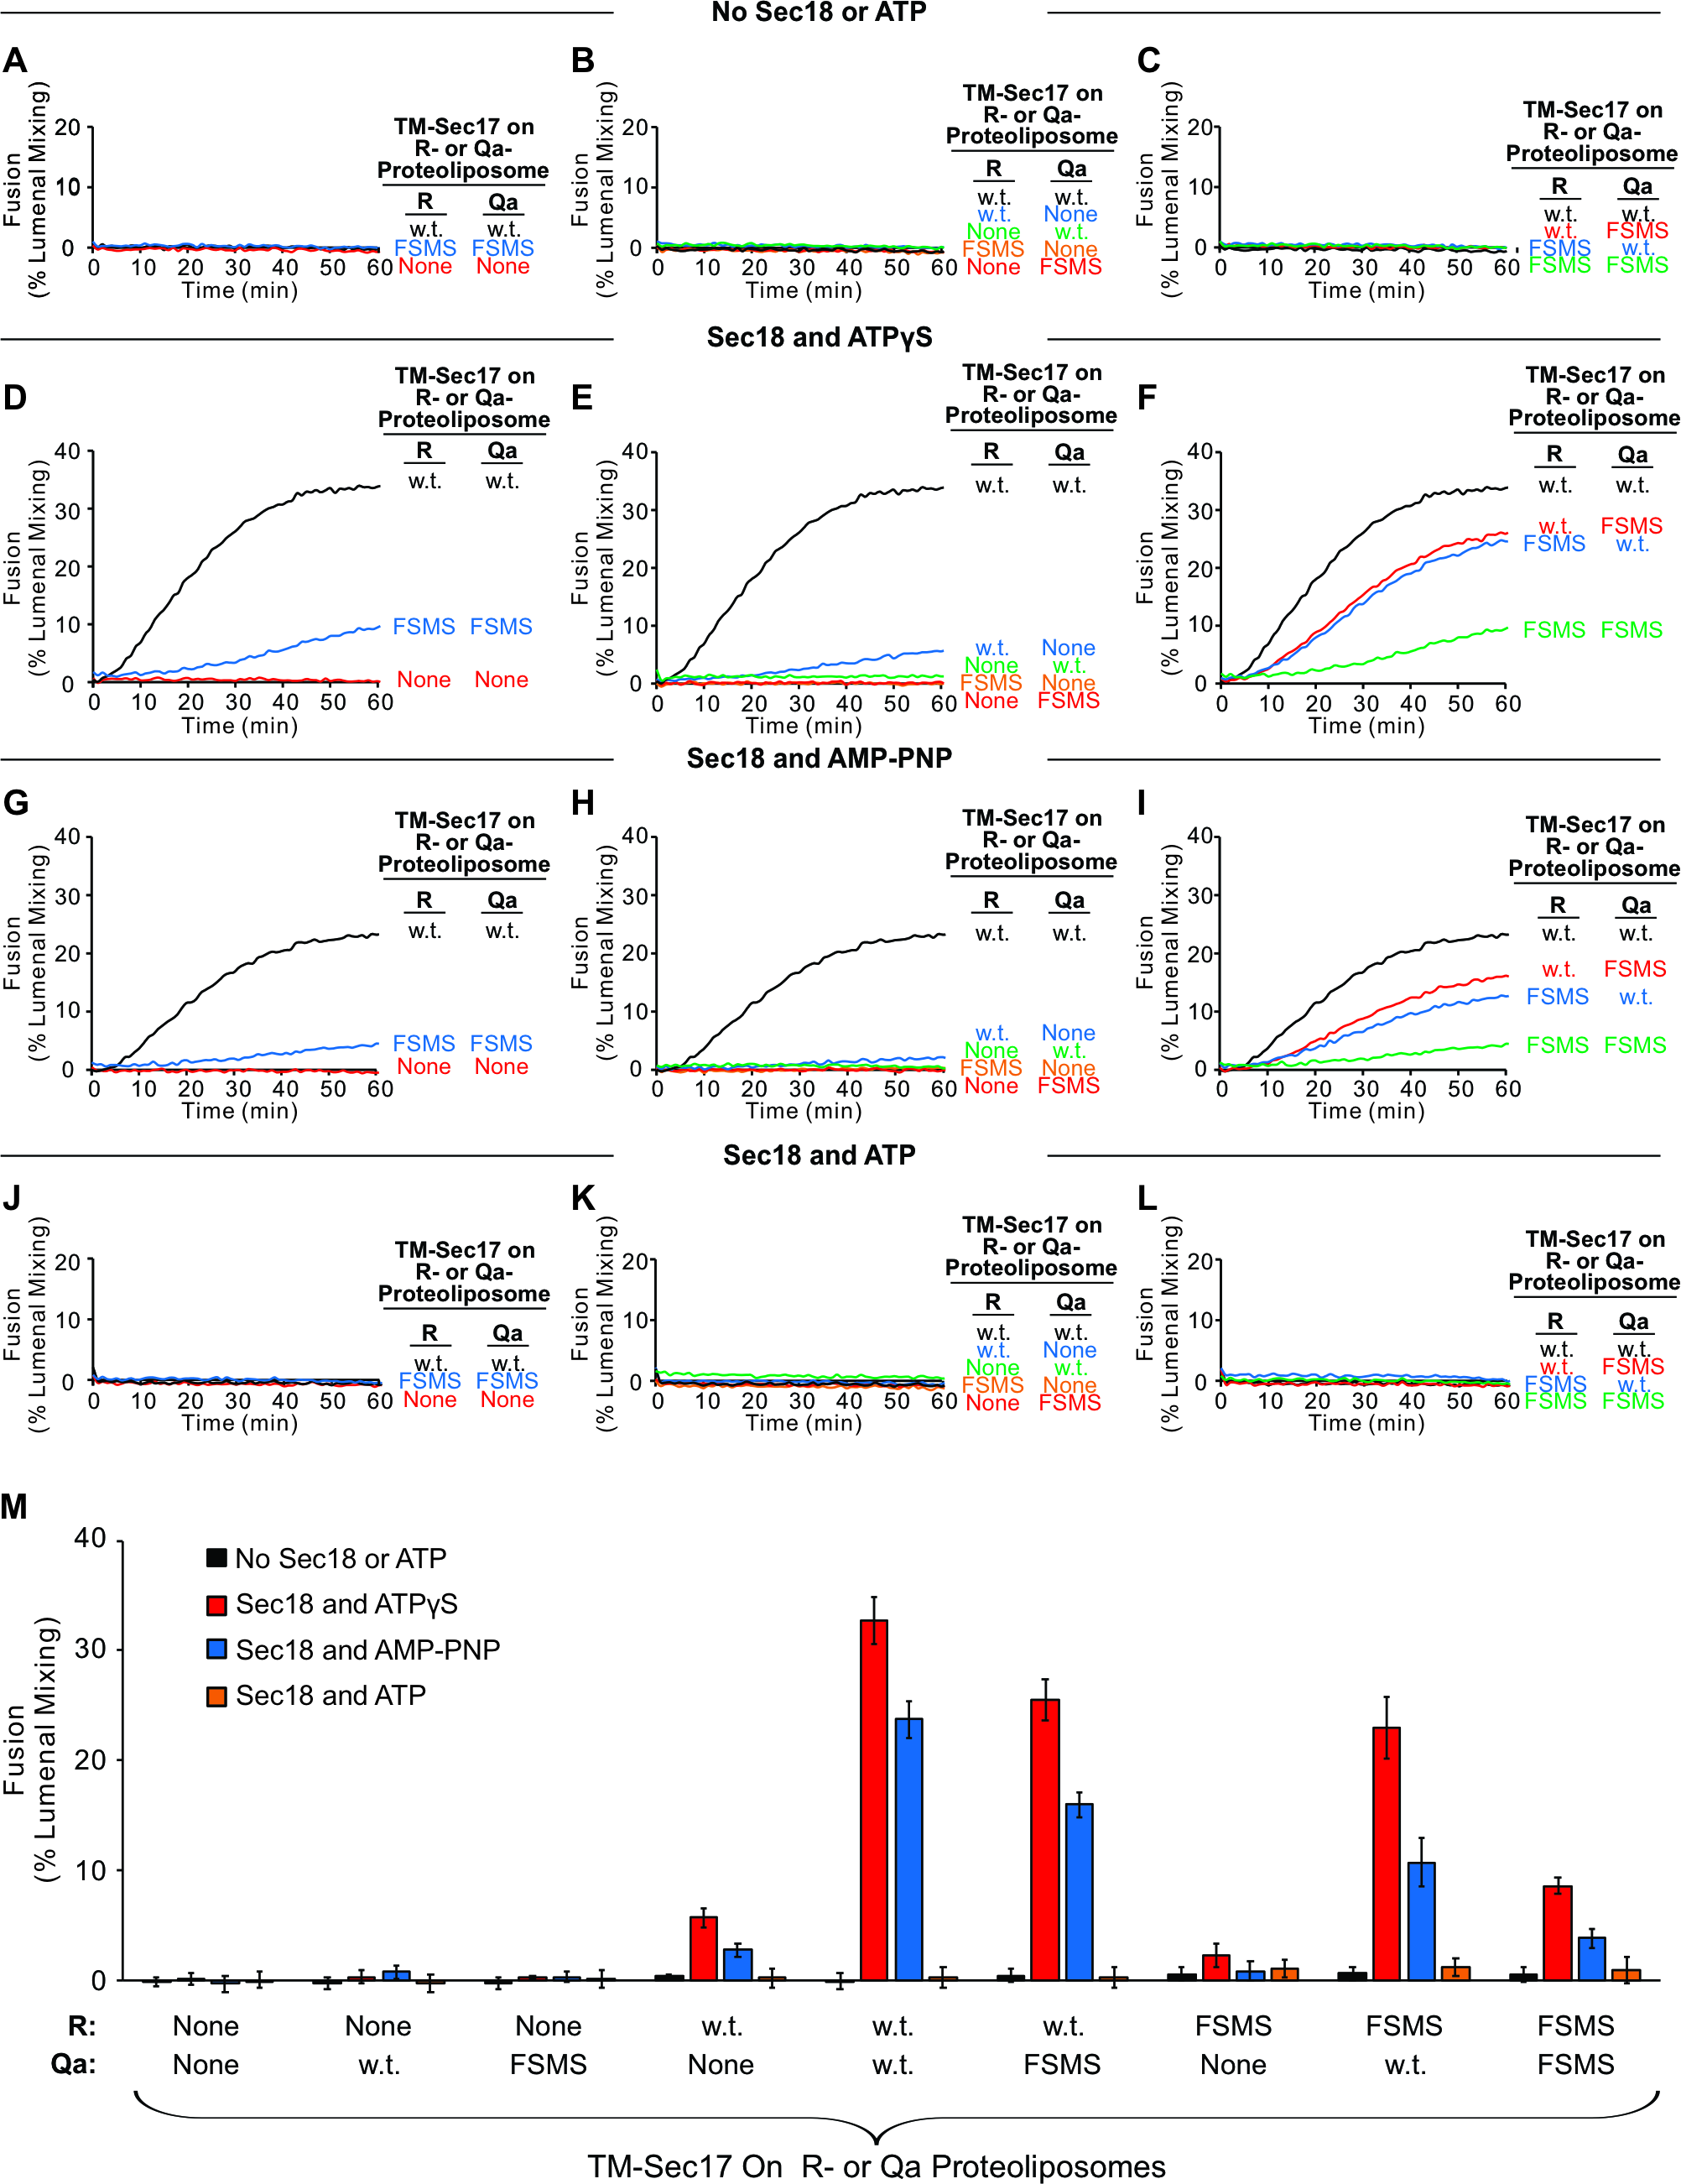

Supplement: supp [file elife-67578-supp-v1.zip › elife_poa_e67578_Figure_5_figure_supplement_2.tif]

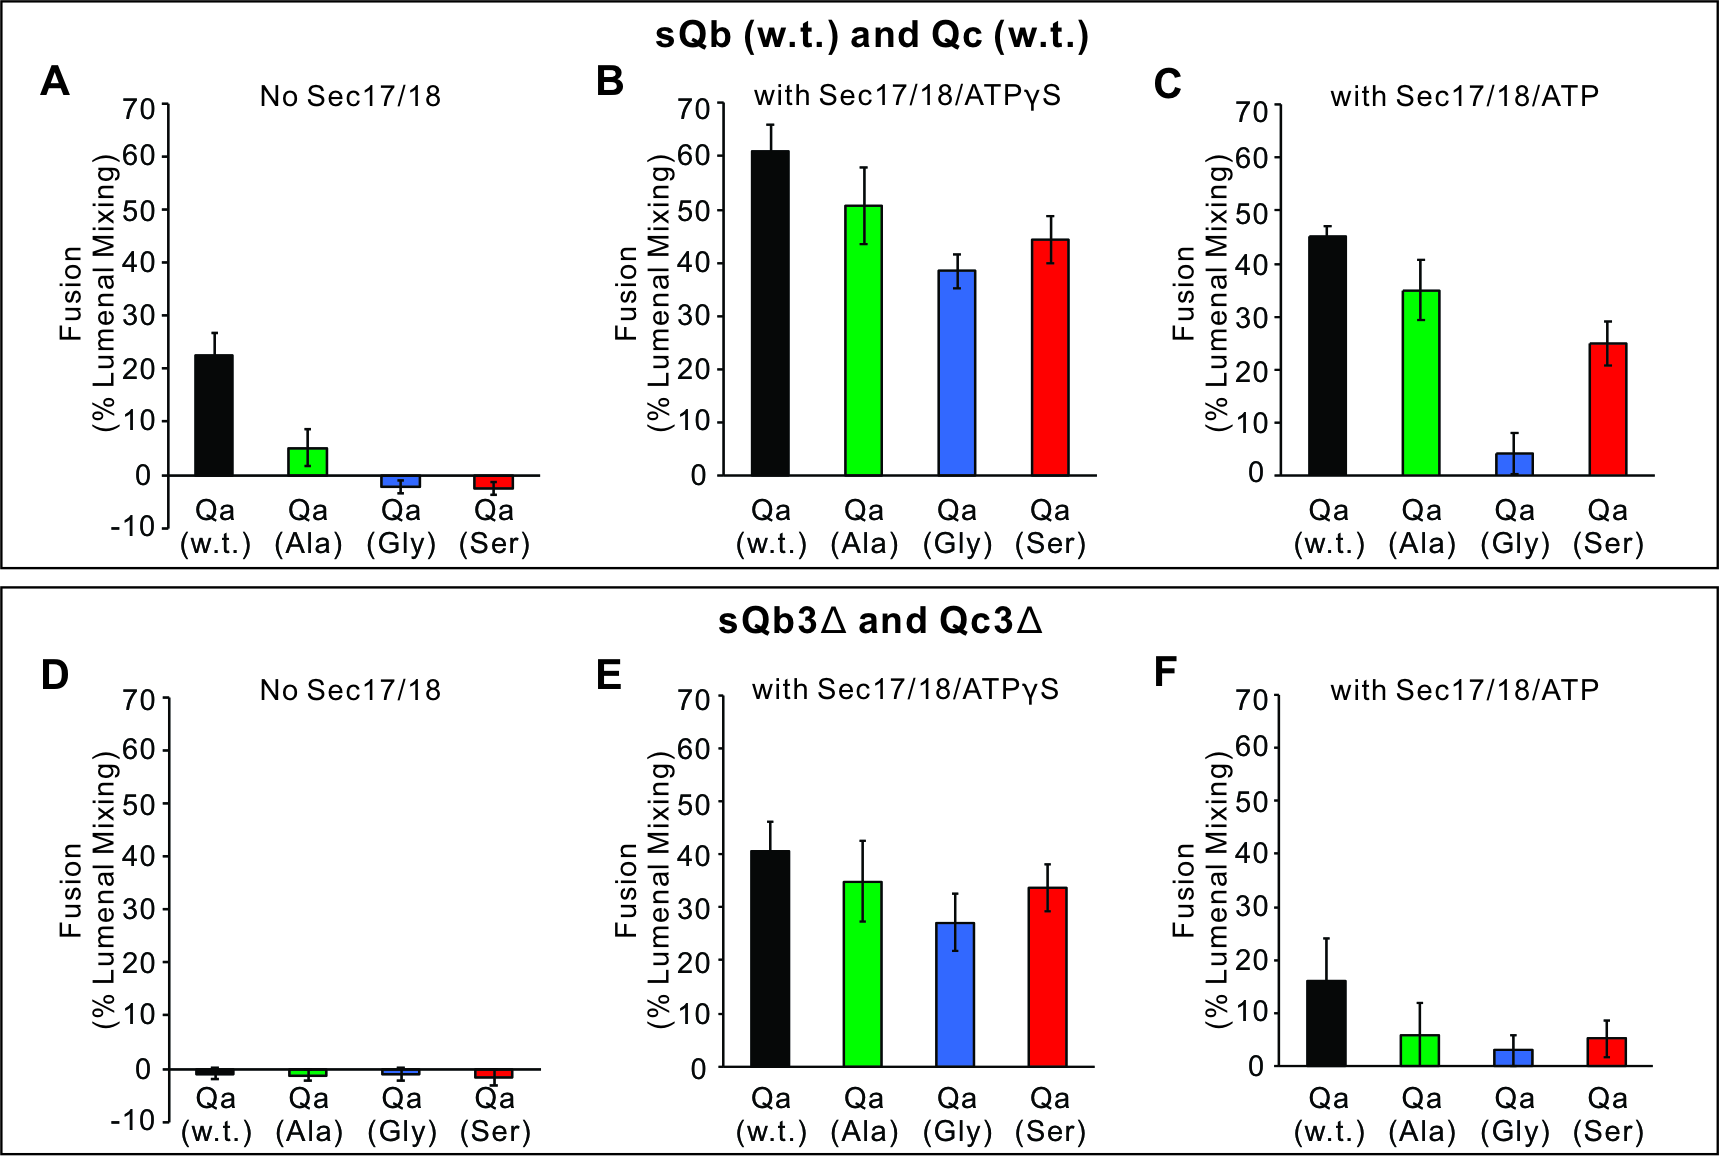

Supplement: supp [file elife-67578-supp-v1.zip › elife_poa_e67578_Figure_6_figure_supplement_1.tif]
